# Supplementary material for: Macrocyclic shape-persistency of cyclo[6]aramide results in enhanced multipoint recognition for the highly efficient template-directed synthesis of rotaxanes
Source: Royal Society of Chemistry journal article supplement (doi:10.1039/c6sc04714a), 2016-11-22
Supplement: c6sc04714a1.pdf [file c6sc04714a1.pdf]

## Electronic Supplementary Information

# Macrocyclic shape-persistency of cyclo[6]aramide results in enhanced multipoint recognition for highly efficient template-directed synthesis of rotaxanes

Xiaowei Li,<sup>a</sup> Xiangyang Yuan,<sup>a</sup> Pengchi Deng,<sup>a</sup> Lixi Chen,<sup>a</sup> Yi Ren,<sup>a</sup> Chengyuan Wang,<sup>a</sup> Lixin Wu,<sup>b</sup> Wen Feng,<sup>a</sup> Bing Gong,<sup>c</sup> Lihua Yuan\*<sup>a</sup>

<sup>a</sup> College of Chemistry, Key Laboratory for Radiation Physics and Technology of Ministry of Education, Analytical & Testing Center, Sichuan University, Chengdu 610064, Sichuan, China

<sup>b</sup> State Key Laboratory of Supramolecular Structure and Materials, Jilin University, Changchun 130012, China

<sup>c</sup> Department of Chemistry, The State University of New York at Buffalo, Buffalo, New York 14260, United States

E-mail: [lhyuan@scu.edu.cn](mailto:lhyuan@scu.edu.cn);

Fax: +86 28 85418755

## Table of Contents

|                                                                                              |            |
|----------------------------------------------------------------------------------------------|------------|
| <b>1. General Methods .....</b>                                                              | <b>3</b>   |
| <b>2. Synthetic Protocols .....</b>                                                          | <b>4</b>   |
| <b>3. Spectroscopic Characterization .....</b>                                               | <b>18</b>  |
| <b>3.1 <sup>1</sup>H and <sup>13</sup>C NMR Spectra of Novel Compounds .....</b>             | <b>18</b>  |
| <b>3.2 MALDI-TOF-MS or HRESI-MS Spectra of Novel Compounds .....</b>                         | <b>34</b>  |
| <b>4. Host-Guest Complexation of 1 and G1-G4.....</b>                                        | <b>40</b>  |
| <b>4.1 NMR Spectra of Complexation.....</b>                                                  | <b>40</b>  |
| <b>4.2 2D NMR Spectra of Host-Guest Complexes .....</b>                                      | <b>45</b>  |
| <b>4.2.1 2D-NOESY Spectra of Host-Guest Complexes.....</b>                                   | <b>45</b>  |
| <b>4.2.2 2D-DOSY Spectra of Host-Guest Complexes .....</b>                                   | <b>50</b>  |
| <b>4.3 UV-vis Spectra of 1<sub>2</sub> ⊃ G1 and 1<sub>2</sub> ⊃ G4.....</b>                  | <b>52</b>  |
| <b>4.4 Job Plots of Host-Guest Complexes.....</b>                                            | <b>53</b>  |
| <b>4.5 Determination of the Stoichiometries and Binding Constants .....</b>                  | <b>59</b>  |
| <b>4.6 MALDI-TOF-MS Spectra of Complexes .....</b>                                           | <b>72</b>  |
| <b>4.7 FT-IR Spectra of Complexes.....</b>                                                   | <b>76</b>  |
| <b>5. Optimization for Synthesis of Rotaxanes .....</b>                                      | <b>78</b>  |
| <b>6. Stacked NMR Spectra of Rotaxanes.....</b>                                              | <b>79</b>  |
| <b>6.1 2D NOESY, HSQC and HMBC Spectra of Rotaxanes .....</b>                                | <b>81</b>  |
| <b>6.2 2D DOSY Spectra of Rotaxanes.....</b>                                                 | <b>91</b>  |
| <b>7. UV-vis Spectra of Rotaxanes .....</b>                                                  | <b>95</b>  |
| <b>8. Redox-Responsive of Host-Guest Complexes and Rotaxanes .....</b>                       | <b>95</b>  |
| <b>9. X-Ray Single Crystal Structures of 3<sub>2</sub> ⊃ G1 and [3]CR-C<sub>6</sub>.....</b> | <b>97</b>  |
| <b>10. Molecular Modeling .....</b>                                                          | <b>104</b> |

## 1. General Methods

All chemicals were obtained from commercial suppliers and were used as received unless otherwise noted. All reactions were conducted with oven-dried glassware under atmosphere or nitrogen. Solvents were dried and distilled following usual protocols. Column chromatography was carried out using silica gel (300-400 mesh). Solvents for extraction and chromatography were reagent grade.  $\text{CDCl}_3$  and  $\text{CD}_3\text{COCD}_3$  were from Cambridge Isotope Laboratories (CIL).

Analytical NMR spectra were recorded on Bruker AVANCE AV II-400 MHz or Bruker AVANCE AV II-600 MHz, at a constant temperature of 298 K. Chemical shifts are reported in  $\delta$  values in ppm using tetramethylsilane (TMS) or residual solvent as internal standard and coupling constants ( $J$ ) are denoted in Hz. Multiplicities are denoted as follows: s = singlet, d = doublet, t = triplet, dd = double doublet and m = multiplet. MALDI-TOF MS spectra were recorded on a Bruker Autoflex III MS spectrometer, matrix is 2,6-dihydroxyacetophenone (DHAP). ESI mass spectra were recorded on a Bruker Daltonics MicroTOF-Q II. ESI-MS were obtained on a Thermo-ITQ. UV-vis spectra were measured by SHIMADZU UV-2450. Fourier transform Infrared (FT-IR) data were collected by a Thermal Nicolet NEXUS 670 FT-IR spectrophotometer. Single crystal X-ray data were measured on a Xcalibur E diffractometer with graphite monochromated  $\text{Mo-K}_\alpha$  radiation ( $\lambda = 0.7107 \text{ \AA}$ ). Data collection and structure refinement details can be found in the CIF files or obtained free of charge via [www.ccdc.cam.ac.uk/data\\_request/cif](http://www.ccdc.cam.ac.uk/data_request/cif).

## 2. Synthetic Protocols

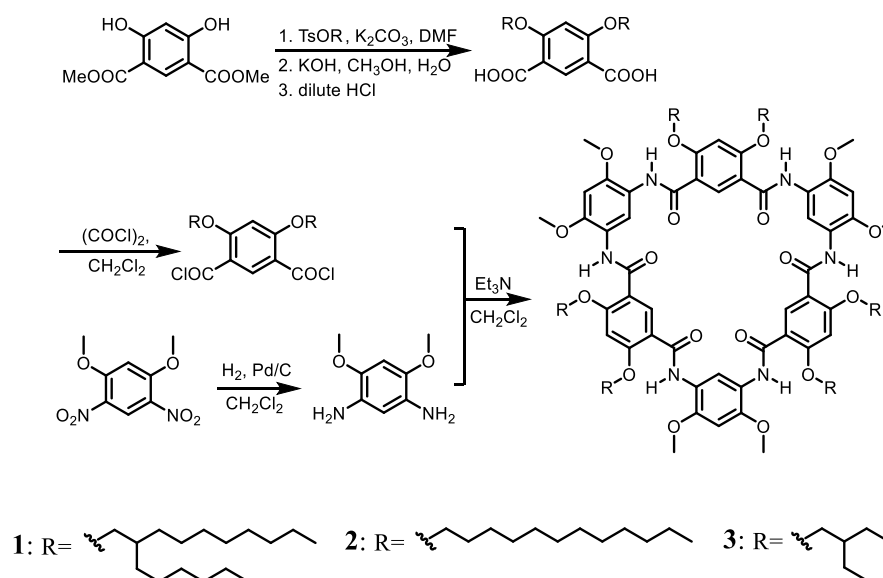

Cyclo[6]aramides **1-3** were prepared according to literature procedures.<sup>[1-3]</sup>

4,6-bis(2-ethylbutoxy)isophthalic acid was synthesized according to an analogous literature procedure.<sup>[1]</sup>

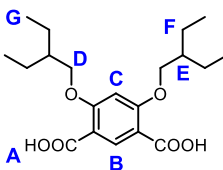 <sup>1</sup>H NMR (400 MHz, CDCl<sub>3</sub>): δ 10.49 (br, s, 2H, *H<sub>A</sub>*), 8.94 (s, 1H, *H<sub>B</sub>*), 6.58 (s, 1H, *H<sub>C</sub>*), 4.17 (d, *J* = 5.2 Hz, 4H, *H<sub>D</sub>*), 1.82 (m, 2H, *H<sub>E</sub>*), 1.55 (m, 8H, *H<sub>F</sub>*), 0.99 (m, 12H, *H<sub>G</sub>*); <sup>13</sup>C NMR (100 MHz, CDCl<sub>3</sub>, 298 K): δ 164.67, 162.89, 140.22, 111.64, 96.50, 72.45, 40.77, 23.43, 11.15; HRMS (ESI), *m/z* calcd for [C<sub>20</sub>H<sub>30</sub>O<sub>6</sub>+H]<sup>+</sup> 367.2115; found: 367.2119; [C<sub>20</sub>H<sub>30</sub>O<sub>6</sub>+Na]<sup>+</sup> 389.1935; found: 389.1936.

### Synthesis of cyclo[6]aramide **3**.

1,5-Dimethoxy-2,4-dinitrobenzene<sup>[1]</sup> (500 mg, 2.19 mmol) was hydrogenated in the presence of 20% Pd/C (100 mg) at 0.3 MPa for 10 h at room temperature. The solution was filtered in darkness as fast as possible followed by immediate removal of the solvent. The reduced diamine was used for the immediate coupling reaction. 4,6-Bis(2-ethylbutoxy)isophthaloyl dichloride (761 mg, 2.19 mmol) was dissolved in CH<sub>2</sub>Cl<sub>2</sub> (80 mL) and added dropwise to a mixture of the above diamine and Et<sub>3</sub>N (1.11 g, 10.95 mmol) in CH<sub>2</sub>Cl<sub>2</sub> (200 mL) at 0 °C. The solution was stirred at 0 °C under N<sub>2</sub> for 4 h. The organic layer was washed with water (20 mL × 3) and dried

over anhydrous  $\text{Na}_2\text{SO}_4$  and filtered. Addition of acetone/ $\text{CH}_3\text{OH}$  to the filtrate caused a precipitation, which was filtered to give a white solid **3** (677 mg, 62%).

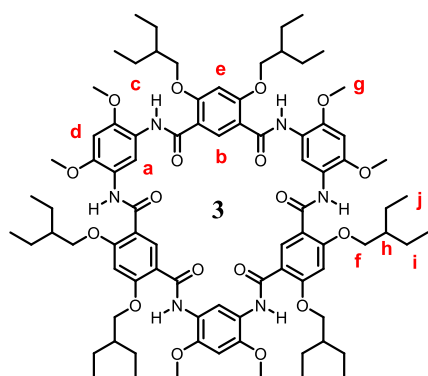

$^1\text{H}$  NMR (400 MHz,  $\text{CDCl}_3$ , 298 K):  $\delta$  9.67 (s, 3H,  $H_a$ ), 9.58 (s, 6H,  $H_c$ ), 9.20 (s, 3H,  $H_b$ ), 6.60 (s, 3H,  $H_d$ ), 6.59 (s, 3H,  $H_e$ ), 4.18 (d,  $J = 5.6$  Hz, 12H,  $H_f$ ), 3.94 (s, 18H,  $H_g$ ), 2.01 (m, 6H,  $H_h$ ), 1.62 (m, 24H,  $H_i$ ), 1.01 (m, 36H,  $H_j$ );  $^{13}\text{C}$  NMR (100 MHz,  $\text{CDCl}_3$ , 298 K):  $\delta$  162.65, 160.55, 146.07, 138.60, 120.10, 116.83, 115.20, 96.16, 94.87, 72.13, 55.93, 40.48, 23.13, 11.50; MALDI-TOF-MS,  $m/z$  calcd for  $[\text{C}_{84}\text{H}_{114}\text{N}_6\text{O}_{18}+\text{H}]^+$  1495.826; found: 1495.889.

### Synthesis of heteroditopic cyclo[6]aramides **5**.

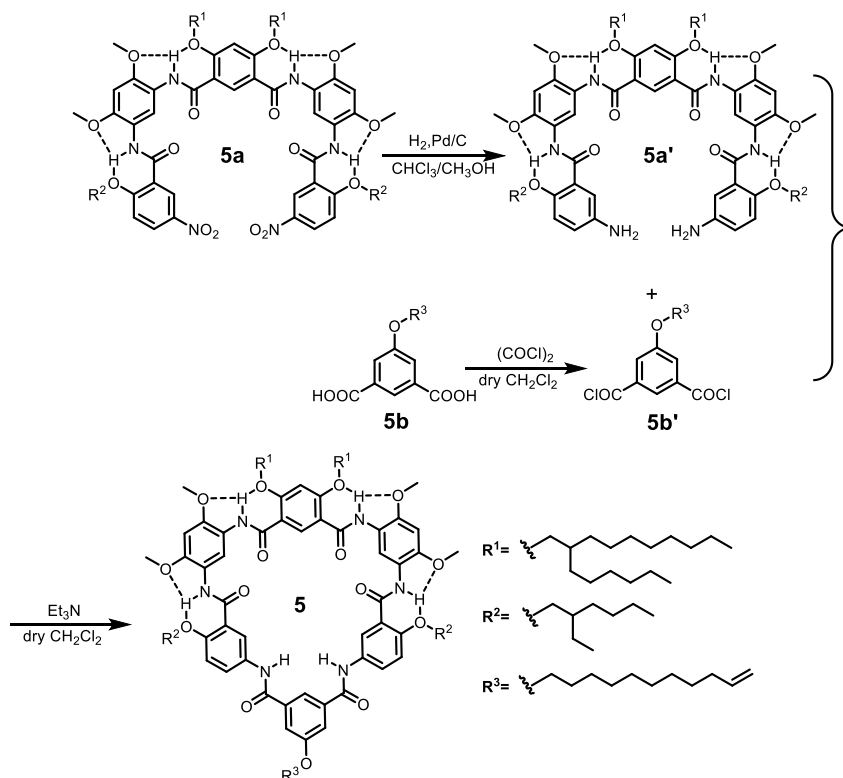

Compounds **5a**, **5b** and **5** were synthesized according to analogous literature procedures.<sup>[4]</sup> **5a** and **5b** were converted into **5a'** and **5b'** by catalytic hydrogenation, respectively. Compounds **5a'** and **5b'** were used directly in the subsequent reaction without further purification.

Pentamer **5a** (400 mg, 0.27 mmol) was hydrogenated in the presence of 20% Pd/C (80

mg) in  $\text{CHCl}_3/\text{CH}_3\text{OH}$  (100 mL, v/v=5:1) for 10 h at 40 °C. The solution was filtered in darkness as fast as possible followed by immediate removal of the solvent. The reduced diamine was used for the immediate coupling reaction. DMF (5  $\mu\text{L}$ ) was added to a suspension of compound **5b** (94 mg, 0.28 mmol) and oxalyl chloride (105 mg, 0.84 mmol) in  $\text{CH}_2\text{Cl}_2$ . The mixture was stirred for 40 min at room temperature. The solvent was evaporated and the resulting acid chloride was dried in vacuum at room temperature for 30 min to get compound **5b'**. Compound **5b'** was dissolved in  $\text{CH}_2\text{Cl}_2$  (60 mL) and added dropwise to a mixture of the above **5a'** and  $\text{Et}_3\text{N}$  (162 mg, 1.60 mmol) in  $\text{CH}_2\text{Cl}_2$  (20 mL) at 0 °C. The solution was stirred under  $\text{N}_2$  for 7 h. The organic layer was washed with water (20 mL  $\times$  3) and dried over anhydrous  $\text{Na}_2\text{SO}_4$  and filtered. The crude product was purified by chromatography on silica gel ( $\text{CH}_2\text{Cl}_2/\text{MeOH}$  = 20: 1) to provide the product **5** as a light yellow solid (291 mg, 62%).

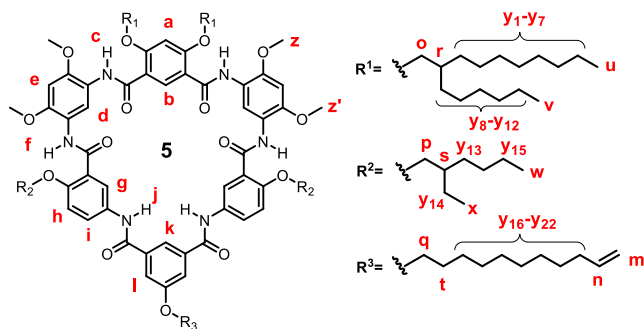

$^1\text{H}$  NMR (400 MHz,  $\text{CDCl}_3$ , 298 K):  $\delta$  = 10.20 (s, 2H,  $H_j$ ), 9.42 (s, 2H,  $H_f$ ), 9.35 (s, 2H,  $H_d$ ), 9.16 (s, 2H,  $H_c$ ), 9.15 (s, 1H,  $H_b$ ), 8.49 (dd,  $J_1$  = 8.8 Hz,  $J_2$  = 2.4 Hz, 2H,  $H_i$ ), 8.20 (s, 3H,  $H_k$  and  $H_g$ ), 7.73 (s, 2H,  $H_l$ ), 7.01 (d,  $J_1$  = 8.8 Hz, 2H,  $H_h$ ), 6.49 (s, 3H,  $H_a$  and  $H_e$ ), 5.82 (m, 1H,  $H_n$ ), 4.95 (m, 2H,  $H_m$ ), 4.07 (m, 10H,  $H_o$ ,  $H_p$  and  $H_q$ ), 3.90 (s, 6H,  $H_z$ ), 3.88 (s, 6H,  $H_z'$ ), 2.04 (m, 2H,  $H_t$ ), 1.82 (m, 4H,  $H_r$  and  $H_s$ ), 1.54-1.25 (m, 78H,  $H_{y1}$ -  $H_{y22}$ ), 0.94-0.84 (m, 24H,  $H_u$ ,  $H_v$ ,  $H_w$  and  $H_x$ );  $^{13}\text{C}$  NMR (100 MHz,  $\text{CDCl}_3$ , 298 K):  $\delta$  165.02, 164.90, 163.08, 162.40, 161.48, 160.77, 159.87, 159.62, 159.54, 153.51, 146.64, 146.59, 145.95, 139.26, 139.21, 135.92, 135.17, 132.72, 132.40, 125.49, 124.15, 122.15, 120.95, 119.85, 118.01, 117.74, 116.11, 114.09, 113.20, 112.94, 94.87, 72.59, 72.31, 68.43, 55.89, 55.74, 38.72, 37.95, 33.83, 31.88, 31.85, 31.04, 30.05, 29.98, 29.62, 29.58, 29.47, 29.42, 29.34, 29.22, 29.16, 29.12, 28.95, 28.78, 26.70, 26.02, 25.94, 23.04, 23.08, 22.67, 14.09, 10.50. ESI-HRMS (m/z) calcd for  $\text{C}_{105}\text{H}_{154}\text{N}_6\text{O}_{15}$  [ $\text{M}+\text{H}$ ] $^+$  1741.421, found [ $\text{M}+\text{H}$ ] $^+$  1741.426.

## Synthesis of Guests G1-G4

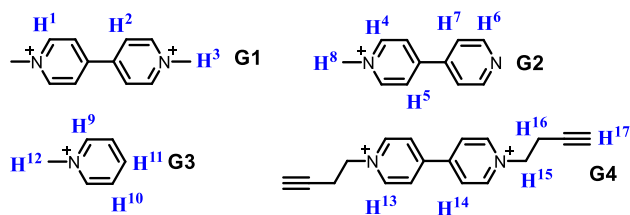

Guests **G1-G4**<sup>[5, 6]</sup> were prepared according to literature procedures.

**G1** <sup>1</sup>H NMR (400 MHz, CD<sub>3</sub>COCD<sub>3</sub>, 298 K): δ 9.40 (d, *J* = 4.4 Hz, 4H, *H*<sup>1</sup>), 8.85 (d, *J* = 4.4 Hz, 4H, *H*<sup>2</sup>), 4.75 (s, 6H, *H*<sup>3</sup>); **G2** <sup>1</sup>H NMR (400 MHz, CD<sub>3</sub>COCD<sub>3</sub>, 298 K): δ 9.29 (d, *J* = 6.4 Hz, 2H, *H*<sup>4</sup>), 8.88 (d, *J* = 6.4 Hz, 2H, *H*<sup>5</sup>), 8.70 (d, *J* = 6.4 Hz, 2H, *H*<sup>6</sup>), 8.00 (d, *J* = 6.4 Hz, 2H, *H*<sup>7</sup>), 4.72 (s, 3H, *H*<sup>8</sup>); **G3** <sup>1</sup>H NMR (400 MHz, CD<sub>3</sub>COCD<sub>3</sub>, 298 K): δ 9.14 (d, *J* = 6.0 Hz, 2H, *H*<sup>9</sup>), 8.75 (m, 1H, *H*<sup>11</sup>), 8.29 (t, *J* = 6.8 Hz, 2H, *H*<sup>10</sup>), 4.66 (s, 3H, *H*<sup>12</sup>); **G4** <sup>1</sup>H NMR (400 MHz, CD<sub>3</sub>COCD<sub>3</sub>, 298 K): δ 9.53 (d, *J* = 4.8 Hz, 4H, *H*<sup>13</sup>), 8.95 (d, *J* = 4.8 Hz, 4H, *H*<sup>14</sup>), 5.16 (t, *J* = 6.0 Hz, 4H, *H*<sup>15</sup>), 3.20 (m, 4H, *H*<sup>16</sup>), 2.74 (t, *J* = 2.4 Hz, 2H, *H*<sup>17</sup>).

### Synthesis of Stopper-N<sub>3</sub>

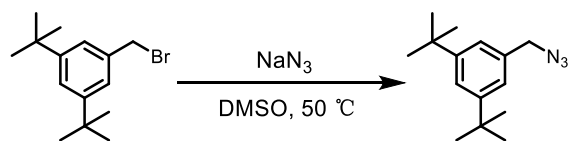

**Stopper-N<sub>3</sub>** was prepared according to the literature procedure<sup>[7]</sup>.

3,5-Di-(tert-butyl)benzyl bromide (**Stopper-Br**) (500 mg, 1.77 mmol) and sodium azide (172 mg, 2.65 mmol) were mixed with DMSO (20 mL) at 50 °C under N<sub>2</sub> and the mixture was stirred for 4 h. Water (50 mL) was added to quench the reaction and the organic material was extracted with ether (3 × 50 mL), washed with brine (3 × 30 mL) and water (3 × 30 mL), dried (Na<sub>2</sub>SO<sub>4</sub>) and concentrated. The colorless oily residue was purified by column chromatography using silica gel (0-30% dichloromethane / petroleum ether) to give **Stopper-N<sub>3</sub>** as colorless oil (352 mg, yield of 81%). **Stopper-N<sub>3</sub>**

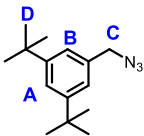 <sup>1</sup>H NMR (400 MHz, CDCl<sub>3</sub>, 298 K): δ 7.40 (t, *J* = 2.0 Hz, 1H, *H*<sub>A</sub>), 7.14 (d, *J* = 2.0 Hz, 2H, *H*<sub>B</sub>), 4.34 (s, 2H, *H*<sub>C</sub>), 1.33 (s, 18H, *H*<sub>D</sub>); <sup>13</sup>C NMR (100 MHz, CDCl<sub>3</sub>, 298 K): δ 151.39, 134.52, 122.38, 122.31, 55.51, 34.85, 31.42; HRMS (ESI), *m/z* calcd for [C<sub>15</sub>H<sub>23</sub>N<sub>3</sub>-N<sub>3</sub>]<sup>+</sup> 203.1794; found: 203.1811; [C<sub>15</sub>H<sub>23</sub>N<sub>3</sub>+H]<sup>+</sup> 246.1965; found: 246.2248.

### Synthesis of dumbbell-shaped Axle-1

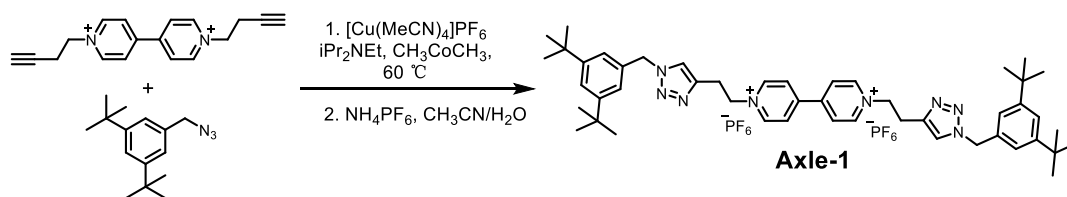

A solution of guest **G4** (40 mg, 0.072 mmol) and  $\text{Cu}(\text{MeCN})_4\text{PF}_6$  (8 mg, 0.021 mmol) in acetone (8 mL) was added under  $\text{N}_2$  to a sealed CEM vial containing 3,5-di-(tert-butyl)benzyl azide (**Stopper-N<sub>3</sub>**) (38 mg, 0.152 mmol) and  $\text{NiPr}_2\text{Et}$  (11 mg, 0.086 mmol). The orange solution was stirred at 40 °C for 24 h. The mixture was washed with  $\text{CH}_2\text{Cl}_2/\text{H}_2\text{O}$  and dried over anhydrous  $\text{Na}_2\text{SO}_4$ , and the solvent was removed. The solid was dissolved in  $\text{CH}_3\text{CN}-\text{H}_2\text{O}$  and saturated aqueous  $\text{NH}_4\text{PF}_6$  was added. The organic solvent was then evaporated under reduced pressure. The precipitate was collected and washed with  $\text{H}_2\text{O}$ . Then the crude material was purified twice by column chromatography using silica gel (eluent:  $\text{CH}_3\text{COCH}_3$  and then  $\text{CH}_3\text{COCH}_3$  with 2%  $\text{NH}_4\text{PF}_6$  (m / v)) and the main fraction was collected. Then,  $\text{H}_2\text{O}$  (200 mL) was added to the residue in order to remove excess  $\text{NH}_4\text{PF}_6$ , leaving the product as an orange precipitate. The solid was collected by filtration, further washed with excess  $\text{H}_2\text{O}$  and dried under high vacuum to afford the **Axle-1** as a dark red solid (69 mg, 92%).

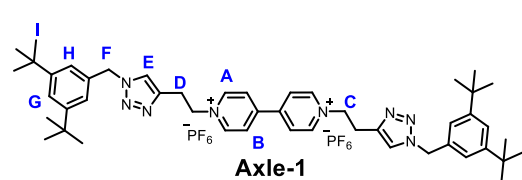

$^1\text{H}$  NMR (400 MHz,  $\text{CD}_3\text{COCD}_3$ , 298 K):  $\delta$  9.45 (d,  $J = 6.4$  Hz, 4H,  $H_A$ ), 8.84 (d,  $J = 6.4$  Hz, 4H,  $H_B$ ), 7.92 (s, 2H,  $H_E$ ), 7.46 (t,  $J = 2.0$  Hz, 2H,  $H_G$ ), 7.24 (d,  $J = 2.0$  Hz, 4H,  $H_H$ ), 5.56 (s, 4H,  $H_F$ ), 5.30 (t,  $J = 6.4$  Hz, 4H,  $H_C$ ), 3.64 (m, 4H,  $H_D$ ), 1.28 (s, 36H,  $H_I$ );  $^{13}\text{C}$  NMR (100 MHz,  $\text{CDCl}_3$ , 298 K):  $\delta$  151.28, 150.10, 146.35, 141.92, 135.09, 126.97, 122.95, 122.41, 122.22, 61.13, 53.96, 34.53, 30.79, 26.94; HRMS (ESI),  $m/z$  calcd for  $[\text{C}_{48}\text{H}_{64}\text{N}_8\text{F}_{12}\text{P}_2-2\text{PF}_6]^{2+}$  376.2621; found: 376.2607 and  $[\text{C}_{48}\text{H}_{64}\text{N}_8\text{F}_{12}\text{P}_2-2\text{PF}_6]^+$  752.5248; found: 752.5246.

### Synthesis of dumbbell-shaped Axle-2

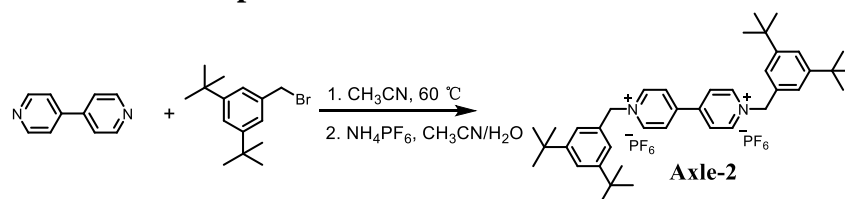



A mixture of 3,5-di-(tert-butyl)benzyl bromide (**Stopper-Br**) (350 mg, 1.24 mmol) and 4,4'-bipyridine (88 mg, 0.56 mmol) was dissolved in CH<sub>3</sub>CN. Then the mixture was stirred under N<sub>2</sub> for 6 days at 60 °C. Then the diethyl ether was added to the mixture and the precipitate was filtered off. This solid was washed with CH<sub>2</sub>Cl<sub>2</sub> and then removed of the solvent of the filtrate to give a light yellow solid. The solid was dissolved in CH<sub>3</sub>CN–H<sub>2</sub>O and saturated aqueous NH<sub>4</sub>PF<sub>6</sub> was added. The organic solvent was then evaporated under reduced pressure. The precipitate was collected and washed with H<sub>2</sub>O to yield **Axle-2** as a white solid (239 mg, 89%, over two steps).

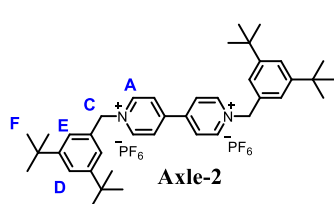

<sup>1</sup>H NMR (400 MHz, CD<sub>3</sub>COCD<sub>3</sub>, 298 K): δ 9.45 (d, *J* = 6.4 Hz, 4H, *H<sub>A</sub>*), 8.68 (d, *J* = 6.4 Hz, 4H, *H<sub>B</sub>*), 7.49 (m, 6H, *H<sub>D</sub>* and *H<sub>E</sub>*), 6.01 (s, 4H, *H<sub>C</sub>*), 1.18 (s, 36H, *H<sub>F</sub>*); <sup>13</sup>C NMR (100 MHz, CDCl<sub>3</sub>, 298 K): δ 153.31, 151.24, 146.61, 133.37, 128.45, 125.00, 124.71, 66.50, 35.64, 31.58;

HRMS (ESI), *m/z* calcd for [C<sub>40</sub>H<sub>54</sub>N<sub>2</sub>F<sub>12</sub>P<sub>2</sub>-2PF<sub>6</sub>]<sup>+</sup> 562.4282; found: 562.4260; [C<sub>40</sub>H<sub>54</sub>N<sub>2</sub>F<sub>12</sub>P<sub>2</sub>-PF<sub>6</sub>]<sup>+</sup> 707.3923; found: 707.3890.

### “Click-capping” approach for the synthesis of [3]rotaxanes or [2]rotaxanes<sup>[8]</sup>

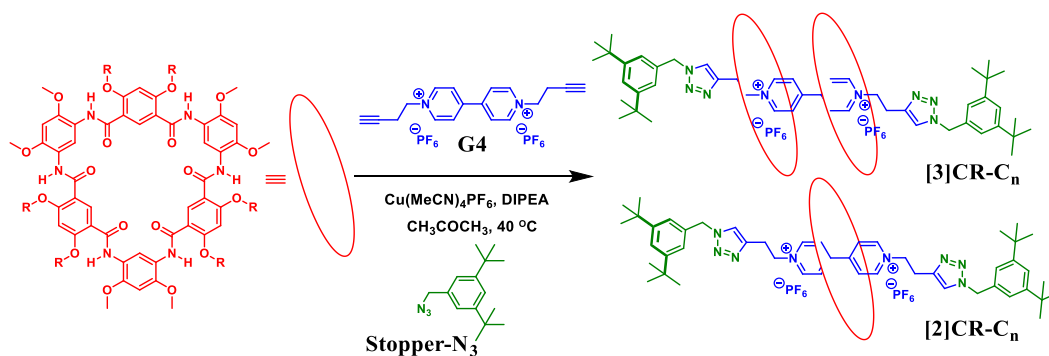

#### General procedure for [3]CR-C<sub>n</sub> (n= 16, 12, 6)

##### Condition A (Entries 1-3, Table 1 in the main text)

A mixture of macrocycle **1-3** (2.0 equiv.), guest **G4** (1.0 equiv.) and Cu(CH<sub>3</sub>CN)<sub>4</sub>PF<sub>6</sub> (0.3 equiv.) was stirred in dry acetone at room temperature for 20 minutes under N<sub>2</sub>. Then a solution of **Stopper-N<sub>3</sub>** (2.5 equiv.) and N,N-diisopropylethylamine (**DIPEA**) (1.2 equiv.) was injected. The mixture was further stirred at 40 °C for 24 h. The resulting solution was washed with 16% aqueous EDTA tetra-sodium saturated ammonia solution (2 × 50 mL). The organic layer was retained and the aqueous layer

extracted twice with CH<sub>2</sub>Cl<sub>2</sub> (2 × 50 mL). The organic extracts were combined and washed by water, dried over Na<sub>2</sub>SO<sub>4</sub> and dried in *vacuo*. Removal of the solvent afforded a red solid and the crude material was purified by flash column chromatography using silica gel (CHCl<sub>3</sub>/CH<sub>3</sub>OH, 20:1, v/v) to give the red solid [3]CR-C<sub>n</sub> or [2]CR-C<sub>n</sub>.

[3]CR-C<sub>16</sub> was synthesized according to the above general procedure using macrocycle **1** (100.0 mg, 0.043 mmol), guest **G4** (12 mg, 0.021 mmol), Cu(CH<sub>3</sub>CN)<sub>4</sub>PF<sub>6</sub> (3 mg, 0.006 mmol) **Stopper-N<sub>3</sub>** (13 mg, 0.053 mmol) and N,N-diisopropylethylamine (**DIPEA**) (3 mg, 0.024 mmol) in dry acetone. Flash column chromatography using silica gel (CHCl<sub>3</sub>/CH<sub>3</sub>OH, 20:1) afforded 103 mg (86% yield) of [3]rotaxane [3]R-C<sub>16</sub> as a red solid.

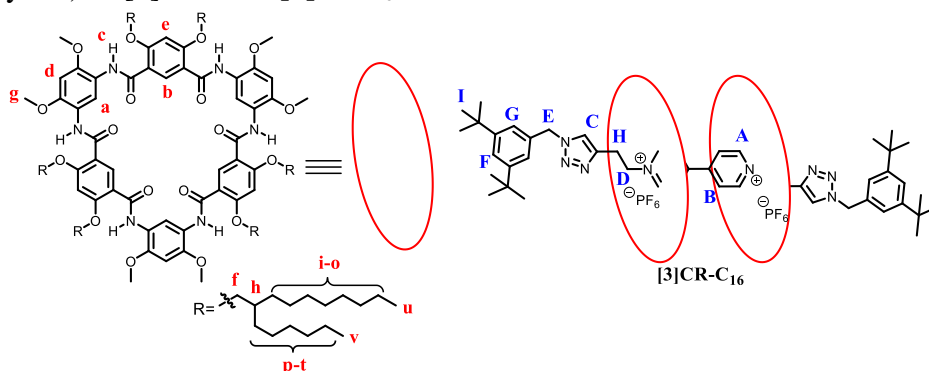

<sup>1</sup>H NMR (400 MHz, CD<sub>3</sub>COCD<sub>3</sub>, 298 K): δ 10.08 (s, 6H, *H<sub>a</sub>*), 9.80 (s, 12H, *H<sub>c</sub>*), 9.59 (d, *J* = 6.4 Hz, 4H, *H<sub>A</sub>*), 8.95 (d, *J* = 6.4 Hz, 4H, *H<sub>B</sub>*), 8.64 (s, 6H, *H<sub>b</sub>*), 7.46 (s, 2H, *H<sub>C</sub>*), 7.08 (m, 8H, *H<sub>d</sub>* and *H<sub>F</sub>*), 6.77 (d, *J* = 1.6 Hz, 4H, *H<sub>G</sub>*), 6.67 (m, 6H, *H<sub>e</sub>*), 5.12 (m, 4H, *H<sub>D</sub>*), 5.10 (s, 4H, *H<sub>E</sub>*), 4.73 (m, 24H, *H<sub>f</sub>*), 4.00 (s, 36H, *H<sub>g</sub>*), 3.37 (m, 4H, *H<sub>H</sub>*), 2.20 (m, 12H, *H<sub>h</sub>*), 1.62-1.21 (m, 324H, *H<sub>I</sub>*, *H<sub>i-o</sub>* and *H<sub>p-t</sub>*), 0.92-0.81 (m, 72H, *H<sub>u</sub>* and *H<sub>v</sub>*); <sup>13</sup>C NMR (100 MHz, CD<sub>3</sub>COCD<sub>3</sub>, 298 K): δ 162.54, 161.46, 151.41, 150.74, 146.88, 146.18, 145.03, 141.59, 139.08, 136.07, 128.95, 123.38, 123.20, 122.30, 120.94, 116.31, 115.62, 98.25, 95.00, 73.71, 71.57, 71.43, 63.27, 56.16, 54.17, 38.36, 35.01, 32.75, 32.71, 32.62, 31.55, 31.43, 31.24, 31.17, 30.93, 30.81, 30.63, 30.48, 30.35, 30.40, 30.07, 27.48, 26.51, 23.52, 23.41, 23.33, 14.51, 14.45, 14.40; MALDI-TOF-MS, *m/z* calcd for [C<sub>336</sub>H<sub>532</sub>N<sub>20</sub>O<sub>36</sub>F<sub>12</sub>P<sub>2</sub>-2PF<sub>6</sub>]<sup>+</sup> 5427.051; found: 5427.495.

[3]CR-C<sub>12</sub> was synthesized according to the above general procedure using macrocycle **2** (201 mg, 0.100 mmol), guest **G4** (26 mg, 0.048 mmol),

Cu(CH<sub>3</sub>CN)<sub>4</sub>PF<sub>6</sub> (5 mg, 0.014 mmol) **Stopper-N<sub>3</sub>** (30 mg, 0.119 mmol) and **DIPEA** (7 mg, 0.057 mmol) in dry acetone. Flash column chromatography using silica gel (CHCl<sub>3</sub> / CH<sub>3</sub>OH, 20 : 1) afforded 220 mg (91% yield) of [3]rotaxane **[3]R-C<sub>12</sub>** as a red solid.

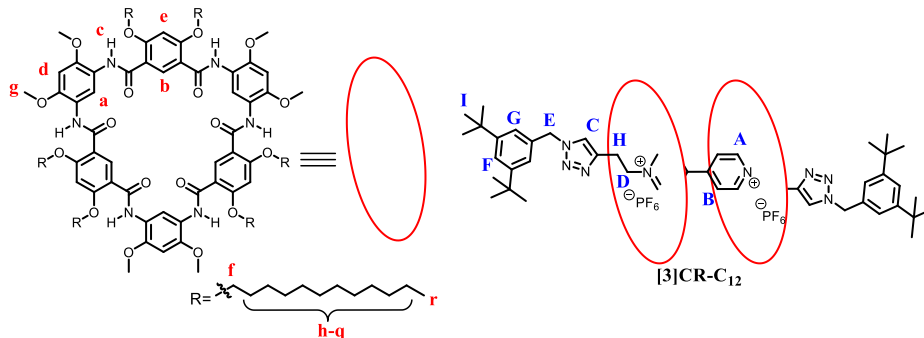

<sup>1</sup>H NMR (400 MHz, CD<sub>3</sub>COCD<sub>3</sub>, 298 K): δ 10.17 (s, 6H, *H<sub>a</sub>*), 9.90 (s, br, 4H, *H<sub>A</sub>*), 9.57 (br, 4H, *H<sub>B</sub>*), 9.43 (s, 12H, *H<sub>C</sub>*), 8.60 (s, 6H, *H<sub>b</sub>*), 7.14 (s, 2H, *H<sub>C</sub>*), 6.70 (s, 4H, *H<sub>G</sub>*), 6.60 (m, br, 2H, *H<sub>F</sub>*), 6.54 (m, br, 12H, *H<sub>d</sub>* and *H<sub>e</sub>*), 5.22 (m, br, 4H, *H<sub>D</sub>*), 5.03 (m, br, 4H, *H<sub>E</sub>*), 4.18-4.07 (m, 24H, *H<sub>f</sub>*), 3.85 (s, 36H, *H<sub>g</sub>*), 3.53 (partial overlayer, m, br, 4H, *H<sub>H</sub>*), 1.33-1.20 (m, 276H, *H<sub>I</sub>* and *H<sub>h-q</sub>*), 1.00-0.83 (m, 36H, *H<sub>r</sub>*); <sup>13</sup>C NMR (100 MHz, CD<sub>3</sub>COCD<sub>3</sub>, 298 K): δ 162.42, 160.90, 151.52, 146.67, 145.60, 142.24, 139.18, 138.65, 136.02, 130.44, 123.91, 122.79, 122.46, 121.31, 116.03, 115.49, 96.87, 94.44, 83.11, 70.66, 55.87, 35.06, 32.72, 31.55, 30.90, 30.69, 30.56, 30.47, 26.60, 23.38, 14.44; MALDI-TOF-MS, m/z calcd for [C<sub>288</sub>H<sub>436</sub>N<sub>20</sub>O<sub>36</sub>F<sub>12</sub>P<sub>2</sub>-2PF<sub>6</sub>]<sup>+</sup> 4753.296; found: 4753.335.

**[3]CR-C<sub>6</sub>** was synthesized according to the above general procedure using macrocycle **3** (200 mg, 0.133 mmol), guest **G4** (35 mg, 0.064 mmol), Cu(CH<sub>3</sub>CN)<sub>4</sub>PF<sub>6</sub> (7 mg, 0.019 mmol) **Stopper-N<sub>3</sub>** (39 mg, 0.159 mmol) and **DIPEA** (10 mg, 0.076 mmol) in dry acetone. The undissolved macrocycle **3** (65 mg) was collected by filter. The percent conversion of macrocycle **3** achieved 68%. Flash column chromatography using silica gel (CHCl<sub>3</sub> / CH<sub>3</sub>OH, 20 : 1) afforded 166 mg (64% yield) of [3]rotaxane **[3]CR-C<sub>6</sub>** as a red solid.

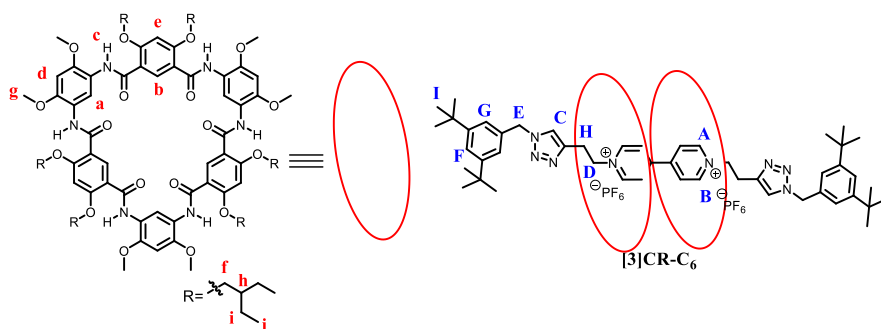

$^1\text{H}$  NMR (400 MHz,  $\text{CD}_3\text{COCD}_3$ , 298 K):  $\delta$  10.10 (s, 6H,  $H_a$ ), 9.73 (s, 12H,  $H_c$ ), 9.62 (d,  $J = 6.4$  Hz, 4H,  $H_A$ ), 9.06 (d,  $J = 6.4$  Hz, 4H,  $H_B$ ), 8.60 (s, 6H,  $H_b$ ), 7.59 (s, 2H,  $H_C$ ), 7.09 (m, 8H,  $H_d$  and  $H_F$ ), 6.75 (d,  $J = 1.6$  Hz, 4H,  $H_G$ ), 6.67 (s, 6H,  $H_e$ ), 5.12-5.10 (m, 4H,  $H_D$ ), 5.10 (s, 4H,  $H_E$ ), 4.40-4.36 (m, 12H,  $H_f$ ), 4.31-4.27 (m, 12H,  $H_f$ ), 3.99 (s, 36H,  $H_g$ ), 4.36 (m, 4H,  $H_H$ ), 2.10 (m, 12H,  $H_h$ ), 1.73-1.38 (m, 48H,  $H_i$  and  $H_j$ ), 0.99 (m, 36H,  $H_i$ ), 0.91 (m, 72H,  $H_j$ );  $^{13}\text{C}$  NMR (100 MHz,  $\text{CD}_3\text{COCD}_3$ , 298 K):  $\delta$  161.73, 160.62, 150.63, 150.46, 145.97, 145.31, 138.05, 135.23, 128.48, 122.65, 122.58, 122.30, 121.43, 120.07, 115.45, 114.74, 97.36, 94.21, 72.00, 62.11, 55.25, 53.13, 39.75, 34.12, 30.50, 27.47, 22.31, 22.08, 10.44, 9.20; MALDI-TOF-MS,  $m/z$  calcd for  $[\text{C}_{216}\text{H}_{292}\text{N}_{20}\text{O}_{36}\text{F}_{12}\text{P}_2\text{-}2\text{PF}_6]^+$  3744.178; found: 3744.265.

#### Condition B (Entry 4, Table 1 in the main text)

A mixture of macrocycle **1** (100 mg, 0.043 mmol), guest **G4** (24 mg, 0.043 mmol) and  $\text{Cu}(\text{CH}_3\text{CN})_4\text{PF}_6$  (5 mg, 0.013 mmol) was stirred in dry acetone at room temperature for 20 minutes under  $\text{N}_2$ . Then a solution of **Stopper-N<sub>3</sub>** (26 mg, 0.107 mmol) and  $\text{N,N}$ -diisopropylethylamine (**DIPEA**) (7 mg, 0.051 mmol) was injected. The mixture was further stirred at 40 °C for 24 h. The resulting solution was washed with 16% aqueous EDTA tetra-sodium saturated ammonia solution ( $2 \times 50$  mL). The organic layer was retained and the aqueous layer extracted twice with  $\text{CH}_2\text{Cl}_2$  ( $2 \times 50$  mL). The organic extracts were combined and washed by water, dried over  $\text{Na}_2\text{SO}_4$  and dried in *vacuo*. Removal of the solvent afforded a red solid and the crude material was purified by flash column chromatography using silica gel ( $\text{CHCl}_3/\text{CH}_3\text{OH}$ , 20:1, v/v) to give the red solid **[3]CR-C<sub>16</sub>** 44 mg (36% yield) and **[2]CR-C<sub>16</sub>** 49 mg (34% yield). The yield of [2]/[3]rotaxane was calculated based on the macrocycle **1**. **[3]CR-C<sub>16</sub>**/**[2]CR-C<sub>16</sub>** = 53/100.

**Condition C** (Entry 5, Table 1 in the main text)

A mixture of macrocycle **1** (100 mg, 0.043 mmol), guest **G4** (12 mg, 0.021 mmol) and  $\text{Cu}(\text{CH}_3\text{CN})_4\text{PF}_6$  (3 mg, 0.006 mmol) was stirred in dry  $\text{CH}_3\text{COCH}_3 / \text{CH}_3\text{CN} = 1 : 1$  (v/v) at room temperature for 20 minutes under  $\text{N}_2$ . Then a solution of **Stopper-N<sub>3</sub>** (13 mg, 0.053 mmol) and *N,N*-diisopropylethylamine (**DIPEA**) (3 mg, 0.024 mmol) was injected. The mixture was further stirred at 40 °C for 24 h. The resulting solution was washed with 16% aqueous EDTA tetra-sodium saturated ammonia solution (2 × 50 mL). The organic layer was retained and the aqueous layer extracted twice with  $\text{CH}_2\text{Cl}_2$  (2 × 50 mL). The organic extracts were combined and washed by water, dried over  $\text{Na}_2\text{SO}_4$  and dried in *vacuo*. Removal of solvents afforded a red solid and the crude material was purified by flash column chromatography using silica gel ( $\text{CHCl}_3/\text{CH}_3\text{OH}$ , 20:1, v/v) to give the red solid **[3]CR-C<sub>16</sub>** 72 mg (60% yield) and **[2]CR-C<sub>16</sub>** 22 mg (18% yield). The yield of **[2]/[3]rotaxane** based on the guest **G4**. **[3]CR-C<sub>16</sub>**/**[2]CR-C<sub>16</sub>** = 193/100.

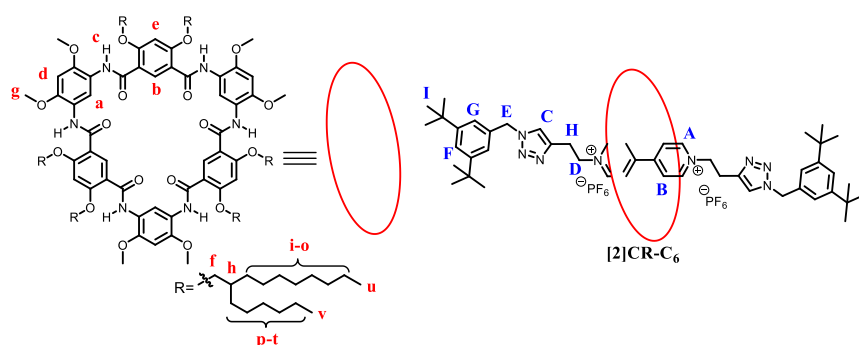

**[2]CR-C<sub>16</sub>**, red solid.  $^1\text{H}$  NMR (400 MHz,  $\text{CD}_3\text{COCD}_3$ , 298 K):  $\delta$  9.97 (s, 3H,  $H_a$ ), 9.77 (s, 6H,  $H_c$ ), 9.55 (d,  $J = 6.4$  Hz, 4H,  $H_A$ ), 9.23 (d,  $J = 6.4$  Hz, 4H,  $H_B$ ), 8.95 (s, 3H,  $H_b$ ), 7.73 (s, 2H,  $H_C$ ), 7.33 (s, 2H,  $H_F$ ), 7.13 (s, 4H,  $H_G$ ), 6.99 (m, 6H,  $H_d$  and  $H_e$ ), 5.32 (m, 4H,  $H_D$ ), 5.25 (s, 4H,  $H_E$ ), 4.43-4.42 (m, 12H,  $H_f$ ), 4.08 (s, 18H,  $H_g$ ), 3.52 (m, 4H,  $H_H$ ), 2.21 (m, 6H,  $H_h$ ), 1.60-1.16 (m, 180H,  $H_i$ ,  $H_{i-o}$  and  $H_{p-t}$ ), 0.88-0.82 (m, 36H,  $H_u$  and  $H_v$ );  $^{13}\text{C}$  NMR (100 MHz,  $\text{CD}_3\text{COCD}_3$ , 298 K):  $\delta$  163.04, 161.74, 152.00, 147.01, 146.87, 140.19, 135.88, 135.36, 123.56, 123.07, 121.02, 115.77, 98.55, 96.14, 73.99, 73.15, 69.27, 65.56, 62.01, 56.99, 54.61, 54.30, 51.68, 48.36, 38.58, 35.28, 32.73, 32.64, 32.58, 31.85, 31.83, 31.60, 30.83, 30.53, 30.48, 27.23, 23.34, 14.41; MALDI-TOF-MS,  $m/z$  calcd for  $[\text{C}_{192}\text{H}_{298}\text{N}_{14}\text{O}_{18}\text{F}_{12}\text{P}_2\text{-}2\text{PF}_6]^+$  3090.299; found: 3090.275.

## “Facile one-pot” approach for the synthesis of [3]rotaxanes and [2]rotaxanes<sup>[9]</sup>

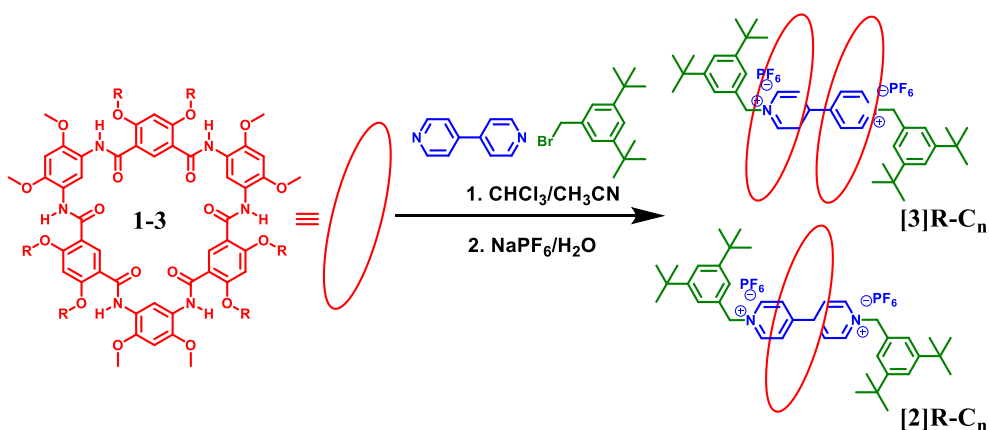

### General procedure for [3]R-C<sub>n</sub> or [2]R-C<sub>n</sub>

A mixture of cyclo[6]aramide **1-3** (2 equiv.), 3,5-di-*tert*-butylbenzyl bromide **Stopper-Br** (2.5 equiv.) and 4,4'-bipyridine (1 equiv.) was stirred in 6 mL CHCl<sub>3</sub>/CH<sub>3</sub>CN (1/1, v/v) under N<sub>2</sub> at 40 °C for 48 h. Removal of solvents afforded a pale red solid and the crude compound was dissolved in acetone/H<sub>2</sub>O and saturated aqueous NaPF<sub>6</sub> was added; the organic solvent was then evaporated under reduced pressure. The precipitate was collected and washed with H<sub>2</sub>O. Then the crude material was purified by flash column chromatography using silica gel (CHCl<sub>3</sub>/CH<sub>3</sub>OH, 30:1, and then CHCl<sub>3</sub>/CH<sub>3</sub>OH, 10:1, v/v) to give the red solid [3]R-C<sub>n</sub> or [2]R-C<sub>n</sub>.

[3]R-C<sub>16</sub> was synthesized according to the above general procedure using macrocycle **1** (210 mg, 89.84 μmol), **Stopper-Br** (30 mg, 106.95 μmol) and 4,4'-bipyridine (6.7 mg, 42.78 μmol) in CHCl<sub>3</sub> / CH<sub>3</sub>CN = 1 / 1 (v/v) (6 mL). Flash column chromatography using silica gel (CHCl<sub>3</sub> / CH<sub>3</sub>OH, 30 : 1, v/v and then CHCl<sub>3</sub>/CH<sub>3</sub>OH, 10:1, v/v) afforded 191 mg (85% yield, over two steps) of [3]rotaxane [3]R-C<sub>16</sub> as a red solid.

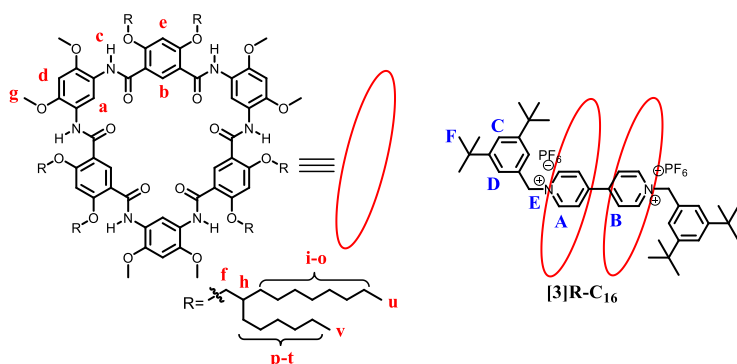

<sup>1</sup>H NMR (400 MHz, CD<sub>3</sub>COCD<sub>3</sub>, 298 K): δ 10.07 (s, br, 6H, *H<sub>a</sub>*), 9.98 (d, *J* = 6.4 Hz,

4H,  $H_A$ ), 9.73 (s, 12H,  $H_C$ ), 8.95 (d,  $J = 6.4$  Hz, 4H,  $H_B$ ), 8.77 (m, 6H,  $H_b$ ), 7.31 (d,  $J = 1.6$  Hz, 4H,  $H_D$ ), 7.16 (t,  $J = 1.6$  Hz, 2H,  $H_C$ ), 7.09 (s, 6H,  $H_d$ ), 6.64 (m, 6H,  $H_e$ ), 6.02 (s, 4H,  $H_E$ ), 4.39-4.33 (m, 24H,  $H_f$ ), 3.98 (m, 36H,  $H_g$ ), 2.16 (m, 12H,  $H_h$ ), 1.63-1.21 (m, 324H,  $H_i$ ,  $H_{i-o}$  and  $H_{p-t}$ ), 0.90-0.79 (m, 72H,  $H_u$  and  $H_v$ );  $^{13}\text{C}$  NMR (100 MHz,  $\text{CD}_3\text{COCD}_3$ , 298 K):  $\delta$  160.85, 159.98, 150.83, 149.75, 145.15, 144.60, 137.98, 132.36, 132.00, 130.56, 128.20, 128.13, 127.45, 122.79, 122.51, 119.64, 114.99, 114.39, 96.85, 93.45, 72.33, 64.47, 54.70, 36.95, 33.80, 31.32, 31.28, 31.20, 30.21, 29.97, 29.69, 29.51, 29.34, 29.21, 29.02, 28.93, 28.67, 26.15, 25.13, 22.09, 21.98, 21.92, 18.45, 13.08, 13.04, 12.99, 12.59; MALDI-TOF-MS,  $m/z$  calcd for  $[\text{C}_{328}\text{H}_{522}\text{N}_{14}\text{O}_{36}\text{F}_{12}\text{P}_2\text{-2PF}_6]^+$  5236.954; found: 5236.883.

[3]R-C<sub>12</sub> was synthesized according to the above general procedure using macrocycle **2** (200 mg, 99.96  $\mu\text{mol}$ ), **Stopper-Br** (34 mg, 119.00  $\mu\text{mol}$ ) and 4,4'-bipyridine (7.4 mg, 47.60  $\mu\text{mol}$ ) in  $\text{CHCl}_3/\text{CH}_3\text{CN} = 1/1$  (v/v) (6 mL). Flash column chromatography using silica gel ( $\text{CHCl}_3/\text{CH}_3\text{OH}$ , 30:1, v/v and then  $\text{CHCl}_3/\text{CH}_3\text{OH}$ , 10:1, v/v) afforded 196 mg (85% yield, over two steps) of [3]rotaxane [3]R-C<sub>12</sub> as a red solid.

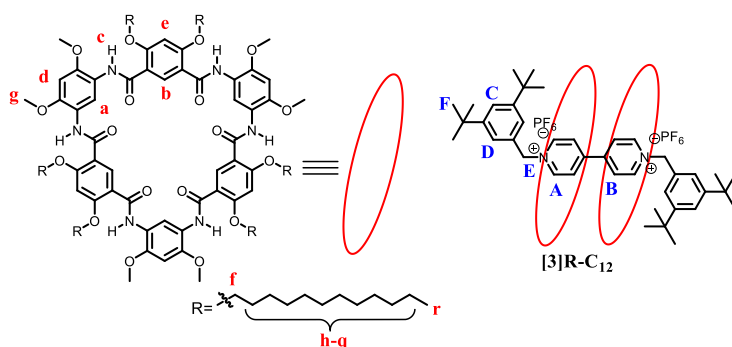

$^1\text{H}$  NMR (400 MHz,  $\text{CD}_3\text{COCD}_3$ , 298 K):  $\delta$  10.02 (s, br, 6H,  $H_a$ ), 9.96 (d, br,  $J = 6.4$  Hz, 4H,  $H_A$ ), 9.73 (d, br,  $J = 6.4$  Hz, 4H,  $H_B$ ), 9.30 (s, 12H,  $H_c$ ), 8.56 (s, 6H,  $H_b$ ), 7.37 (m, 4H,  $H_D$ ), 7.10 (s, 2H,  $H_C$ ), 6.49 (s, 6H,  $H_d$ ), 6.39 (s, br, 6H,  $H_e$ ), 6.04 (s, br, 4H,  $H_E$ ), 4.03-3.96 (m, 24H,  $H_f$ ), 3.83 (s, 36H,  $H_g$ ), 1.92 (m, br, 24H,  $H_h$ ), 1.32-1.21 (m, 252H,  $H_F$  and  $H_{i-q}$ ), 0.85 (m, 36H,  $H_r$ );  $^{13}\text{C}$  NMR (100 MHz,  $\text{CD}_3\text{COCD}_3$ , 298 K):  $\delta$  161.23, 159.72, 151.43, 151.15, 145.27, 144.44, 138.50, 133.04, 130.32, 123.69, 120.61, 114.97, 114.75, 95.66, 93.41, 69.54, 54.87, 34.44, 34.25, 31.88, 31.16, 30.94, 30.65, 30.07, 29.86, 29.71, 29.39, 25.77, 22.55, 13.60; MALDI-TOF-MS,  $m/z$  calcd for  $[\text{C}_{280}\text{H}_{426}\text{N}_{14}\text{O}_{36}\text{F}_{12}\text{P}_2\text{-2PF}_6]^+$  4563.199; found: 4563.225.

[2]**R-C**<sub>6</sub> was synthesized according to the above general procedure using macrocycle **3** (200 mg, 133.70 μmol), **Stopper-Br** (45 mg, 159.17 μmol) and 4,4'-bipyridine (9.9 mg, 63.67 μmol) in CHCl<sub>3</sub> / CH<sub>3</sub>CN = 1 / 1 (v / v) (6 mL). The undissolved macrocycle **3** (33 mg) was collected by filter. The percent conversion of macrocycle **3** achieved 84%. Flash column chromatography using silica gel (CHCl<sub>3</sub> / CH<sub>3</sub>OH, 30 : 1, v / v and then CHCl<sub>3</sub> / CH<sub>3</sub>OH, 10 : 1, v / v) afforded 106 mg (71% yield) of [2]rotaxane [2]**R-C**<sub>6</sub> as a pale orange solid.

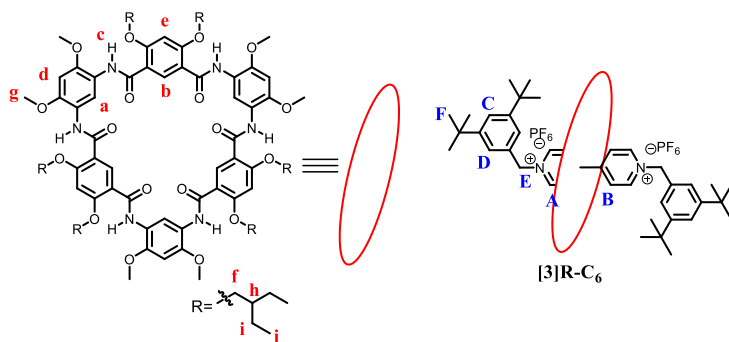

<sup>1</sup>H NMR (400 MHz, CD<sub>3</sub>COCD<sub>3</sub>, 298 K): δ 9.91 (s, 3H, *H<sub>a</sub>*), 9.72 (d, overlap, 4H, *H<sub>A</sub>*), 9.70 (s, 6H, *H<sub>c</sub>*), 9.31 (d, *J* = 6.4 Hz, 4H, *H<sub>B</sub>*), 8.98 (s, 3H, *H<sub>b</sub>*), 7.41 (s, br, 4H, *H<sub>D</sub>*), 7.38 (s, 2H, *H<sub>C</sub>*), 7.12 (s, 3H, *H<sub>d</sub>*), 6.97 (s, 3H, *H<sub>e</sub>*), 6.23 (s, 4H, *H<sub>E</sub>*), 4.40 (d, *J* = 6.0 Hz, 12H, *H<sub>f</sub>*), 4.07 (s, 18H, *H<sub>g</sub>*), 3.13 (m, br, 6H, *H<sub>h</sub>*), 1.64 (m, 24H, *H<sub>i</sub>*), 1.06 (s, 36H, *H<sub>F</sub>*), 1.04-0.99 (m, 36H, *H<sub>j</sub>*); <sup>13</sup>C NMR (100 MHz, CD<sub>3</sub>COCD<sub>3</sub>, 298 K): δ 162.13, 160.09, 151.89, 150.84, 145.91, 145.71, 138.07, 132.65, 128.58, 123.53, 120.04, 116.31, 114.80, 97.95, 95.22, 72.26, 65.40, 55.71, 40.30, 34.44, 30.51, 29.75, 22.89, 10.23; MALDI-TOF-MS, *m/z* calcd for [C<sub>124</sub>H<sub>168</sub>N<sub>8</sub>O<sub>18</sub>F<sub>12</sub>P<sub>2</sub>-2PF<sub>6</sub>]<sup>+</sup> 2058.255; found: 2058.365.

## References

- [1] Yuan, L.; Feng, W.; Yamato, K.; Sanford, A. R.; Xu, D.; Guo, H.; Gong, B., *J. Am. Chem. Soc.* **2004**, *126*, 11120.
- [2] Yang, Y.; Feng, W.; Hu, J.; Zou, S.; Gao, R.; Yamato, K.; Kline, M.; Cai, Z.; Gao, Y.; Wang, Y.; Li, Y.; Yang, Y.; Yuan, L.; Zeng, X. C.; Gong, B., *J. Am. Chem. Soc.* **2011**, *133*, 18590.
- [3] Hu, J.; Chen, L.; Ren, Y.; Deng, P.; Li, X.; Wang, Y.; Jia, Y.; Luo, J.; Yang, X.; Feng, W.; Yuan, L., *Org. Lett.* **2013**, *15*, 4670.
- [4] Hu, J.; Chen, L.; Shen, J.; Luo, J.; Deng, P.; Ren, Y.; Zeng, H.; Feng, W.; Yuan, L. *Chem. Commun.* **2014**, *50*, 8024.
- [5] Xiao, Y.; Chu, L.; Sanakis, Y.; Liu, P., *J. Am. Chem. Soc.* **2009**, *131*, 9931.
- [6] Coskun, A.; Saha, S.; Aprahamian, I.; Stoddart, J. F., *Org. Lett.* **2008**, *10*, 3187.



- [7] Gassensmith, J. J.; Barr, L.; Baumes, J. M.; Paek, A.; Nguyen, A.; Smith, B. D., *Org. Lett.* **2008**, *10*, 3343.
- [8] (a) Neal, E. A.; Goldup, S., *Chem. Sci.* **2015**, *6*, 2398; (b) Winn, J.; Pinczewska, A.; Goldup, S., *J. Am. Chem. Soc.* **2013**, *135*, 13318.
- [9] (a) Xu, Z.; Jiang, L.; Feng, Y.; Zhang, S.; Liang, J.; Pan, S.; Yang, Y.; Yang, D.; Cai, Y., *Org. Biomol. Chem.* **2011**, *9*, 1237; (b) Cheng, P.-N.; Lin, C.-F.; Liu, Y.-H.; Lai, C.-C.; Peng, S.-M.; Chiu, S.-H., *Org. Lett.* **2006**, *8*, 435.

### 3. Spectroscopic Characterization

#### 3.1 $^1\text{H}$ and $^{13}\text{C}$ NMR Spectra of Novel Compounds

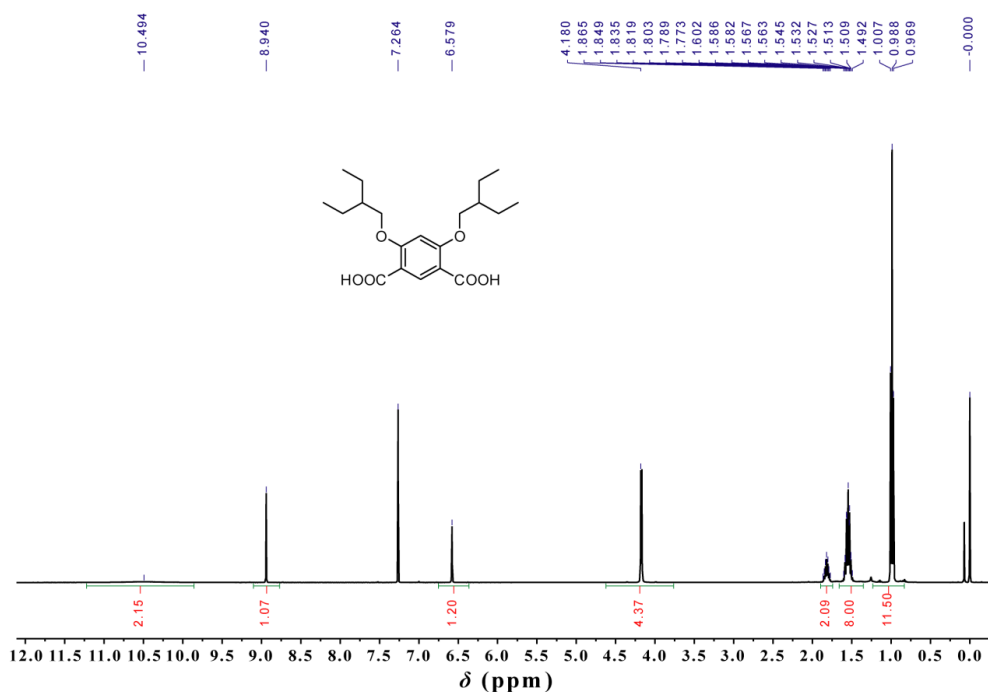

Figure S1  $^1\text{H}$  NMR spectrum of 4,6-bis(2-ethylbutoxy)isophthalic acid (400 MHz,  $\text{CDCl}_3$ , 298 K).

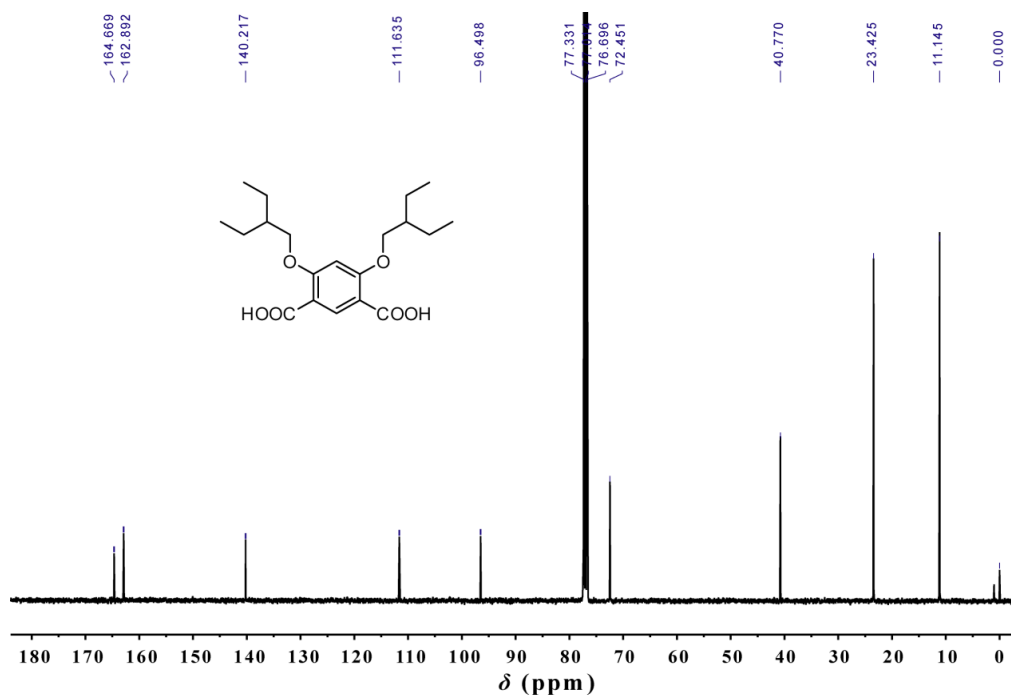

Figure S2  $^{13}\text{C}$  NMR spectrum of 4,6-bis(2-ethylbutoxy)isophthalic acid (100 MHz,  $\text{CDCl}_3$ , 298 K).

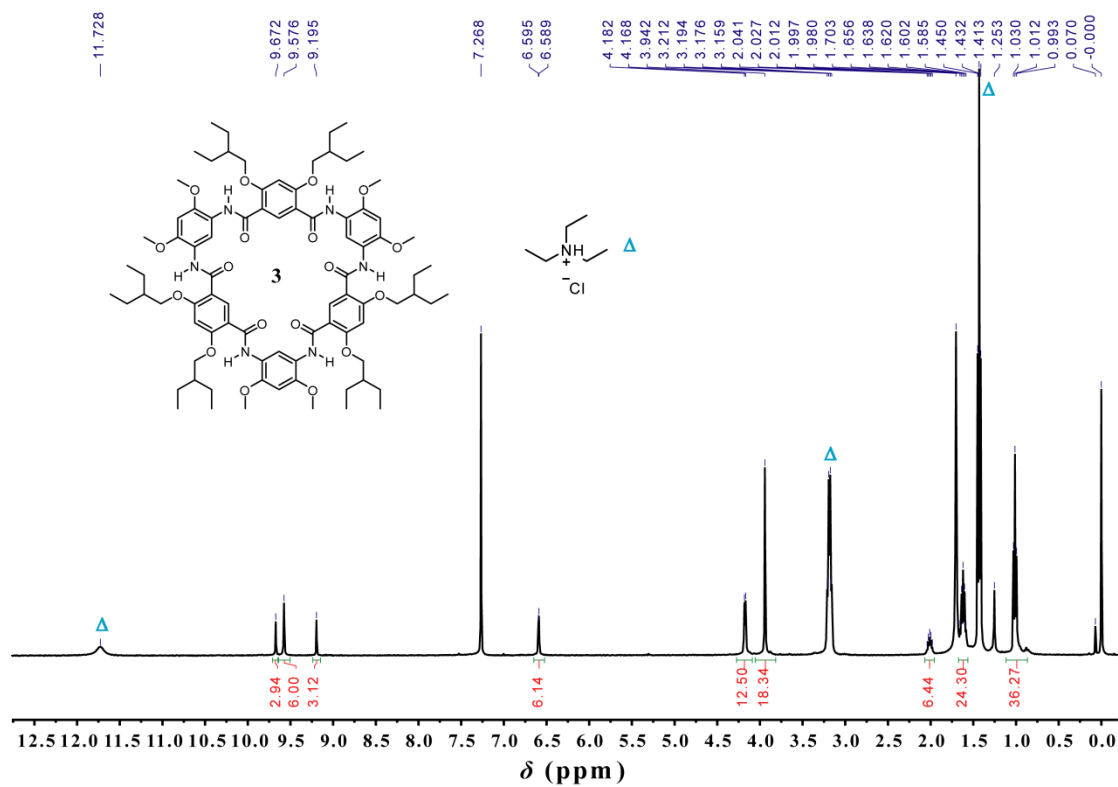

**Figure S3**  $^1\text{H}$  NMR spectrum of cyclo[6]aramide **3** and additional  $\text{Et}_3\text{N HCl}$  ( $\Delta$ ) (400 MHz,  $\text{CDCl}_3$ , 298 K).

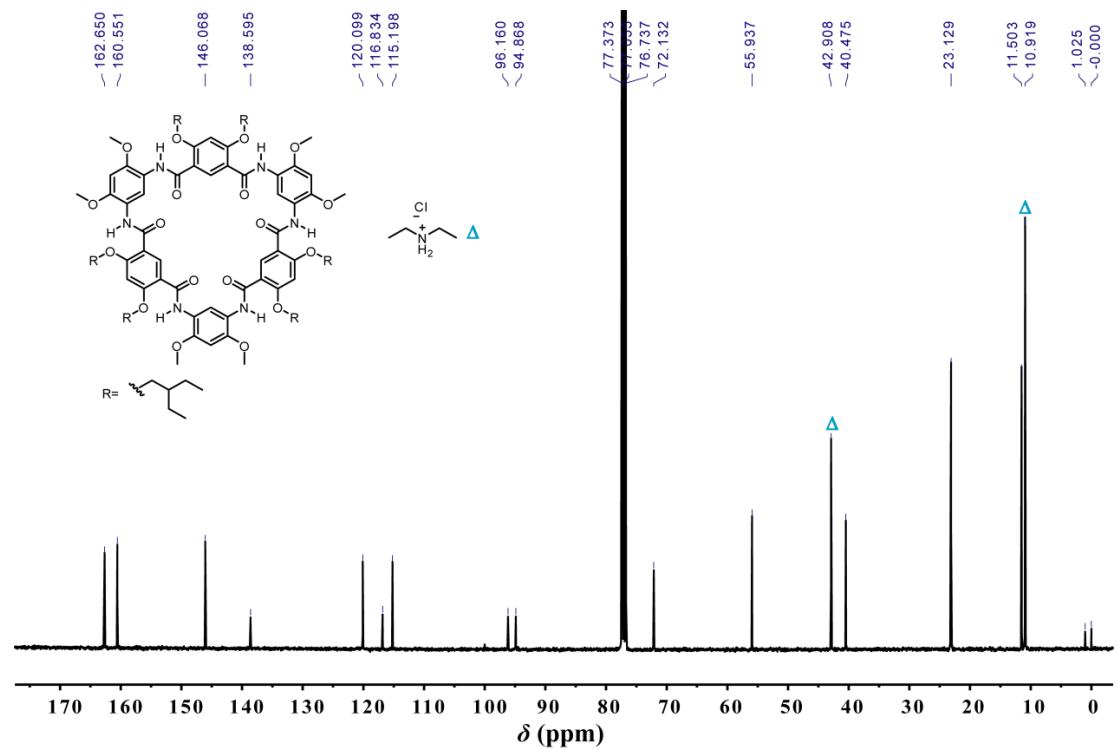

**Figure S4**  $^{13}\text{C}$  NMR spectrum of cyclo[6]aramide **3** and additional  $\text{Et}_2\text{NH HCl}$  ( $\Delta$ ) (100 MHz,  $\text{CDCl}_3$ , 298 K).

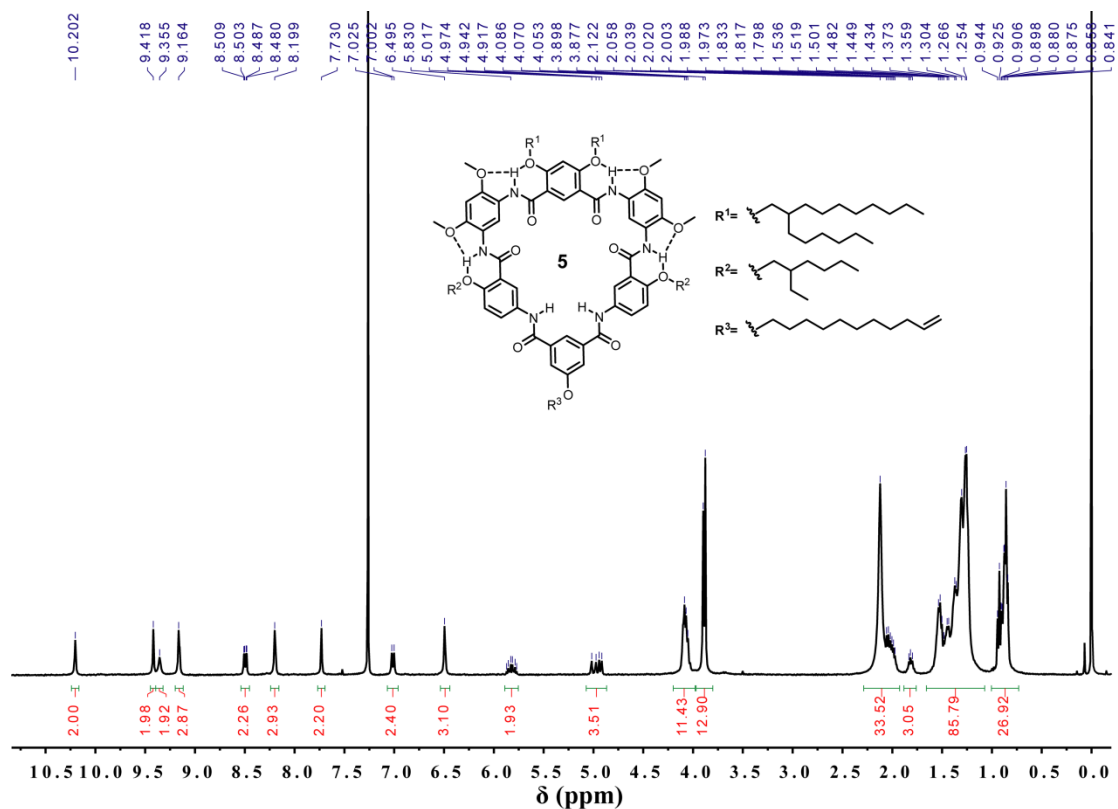

Figure S5 <sup>1</sup>H NMR spectrum of heteroditopic cyclo[6]aramides **5** (400 MHz, CDCl<sub>3</sub>, 298 K).

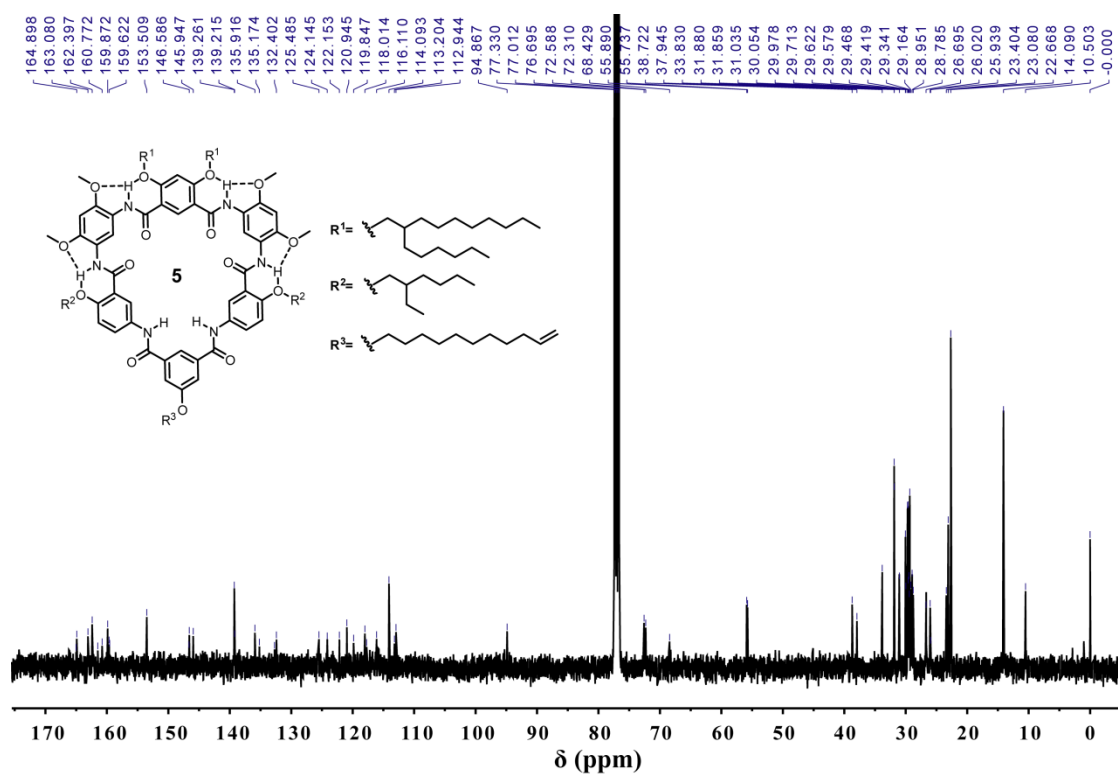

Figure S6 <sup>13</sup>C NMR spectrum of heteroditopic cyclo[6]aramides **5** (100 MHz, CDCl<sub>3</sub>, 298 K).

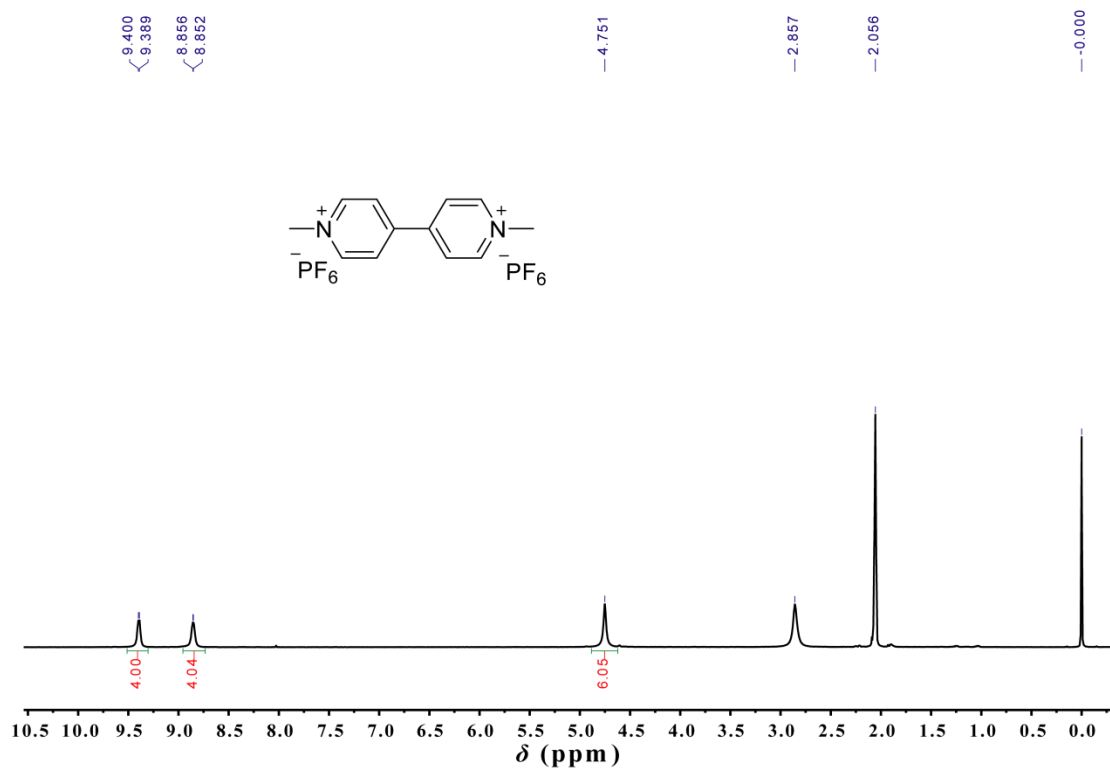

Figure S7  $^1\text{H}$  NMR spectrum of G1 (400 MHz,  $\text{CD}_3\text{COCD}_3$ , 298 K).

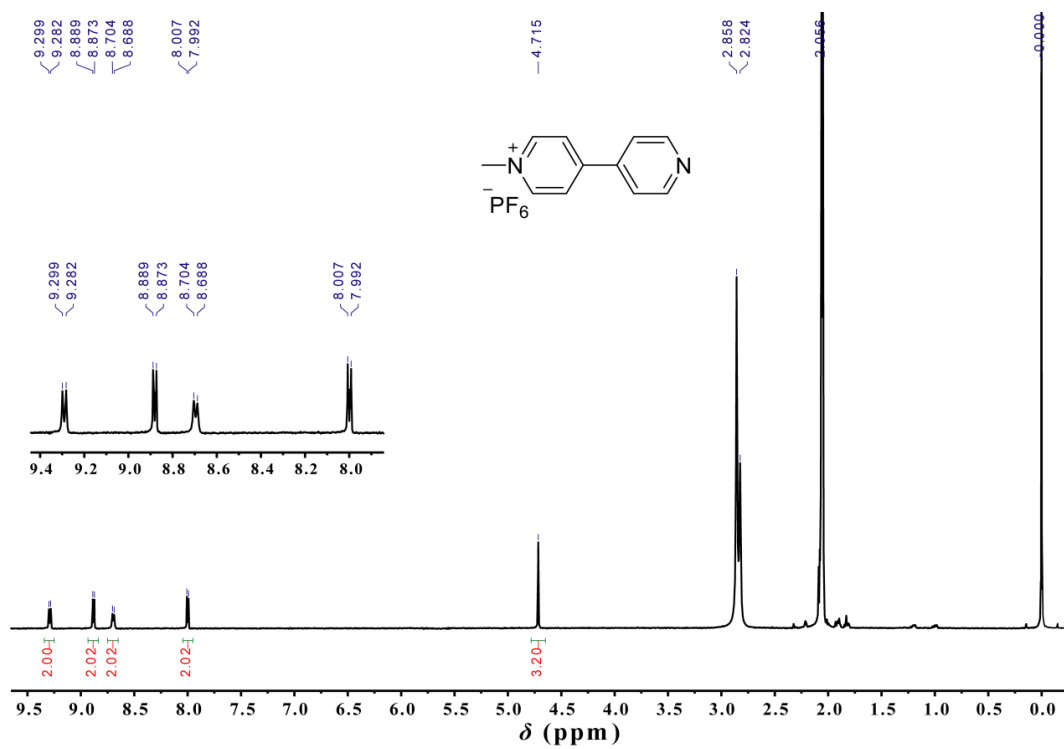

Figure S8  $^1\text{H}$  NMR spectrum of G2 (400 MHz,  $\text{CD}_3\text{COCD}_3$ , 298 K).

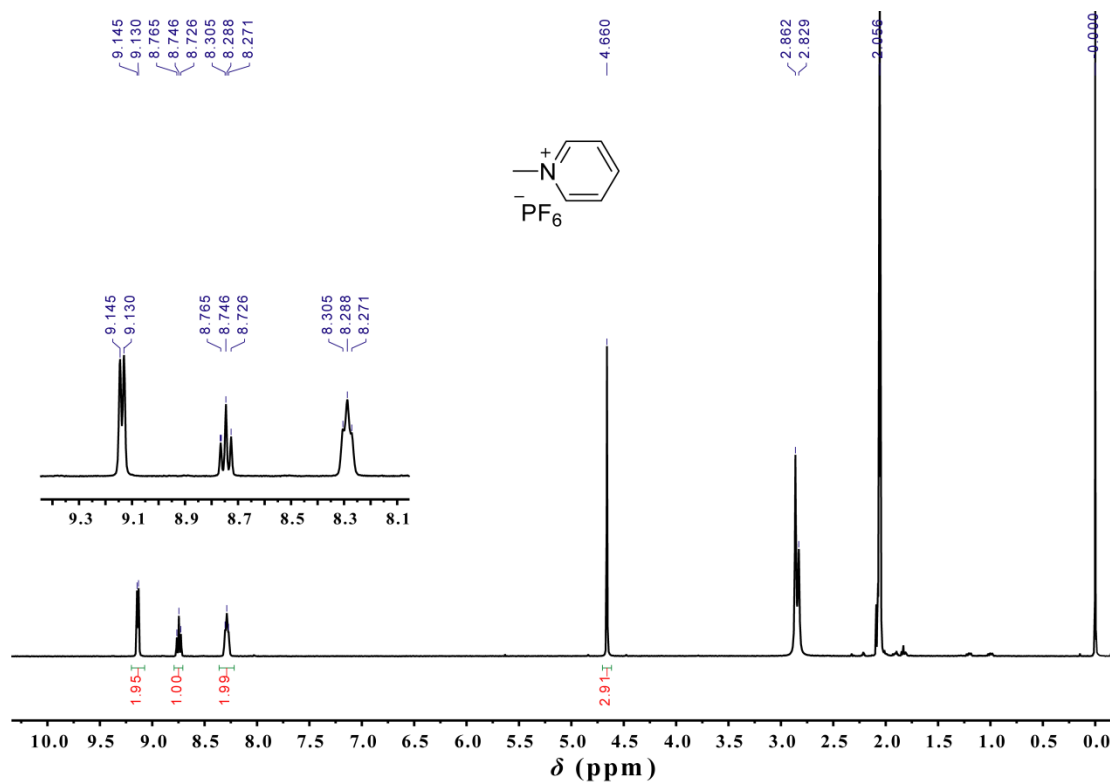

Figure S9  $^1\text{H}$  NMR spectrum of G3 (400 MHz,  $\text{CD}_3\text{COCD}_3$ , 298 K).

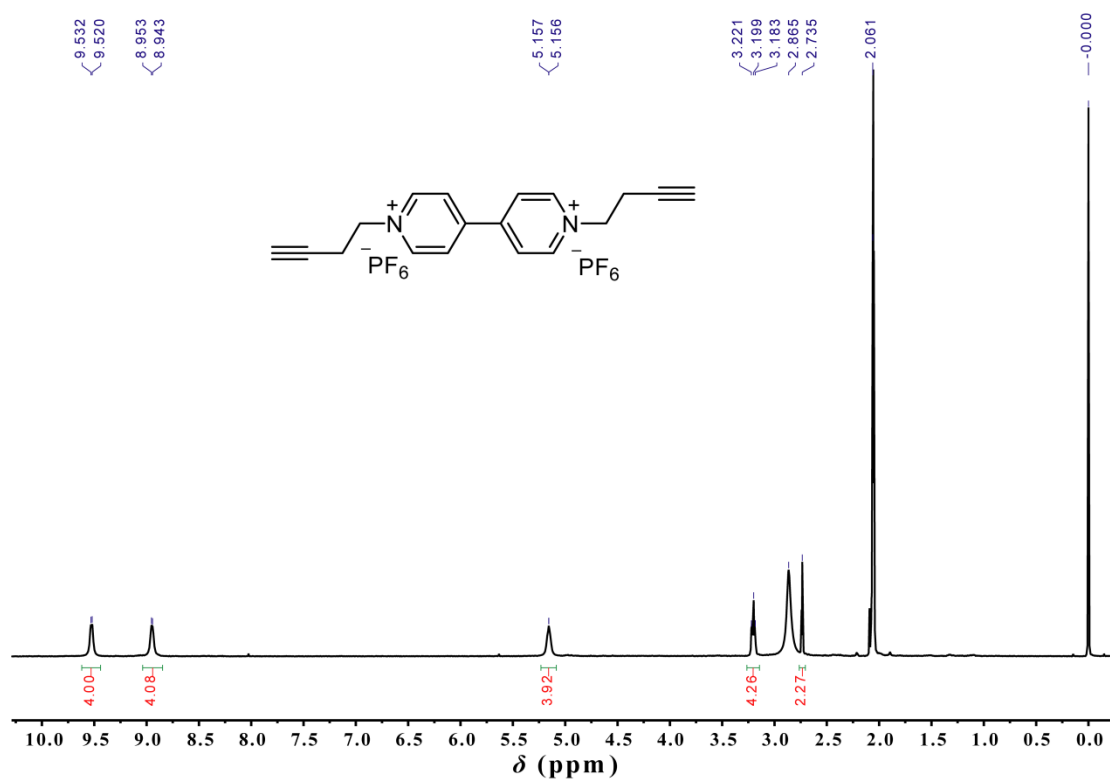

Figure S10  $^1\text{H}$  NMR spectrum of G4 (400 MHz,  $\text{CD}_3\text{COCD}_3$ , 298 K).

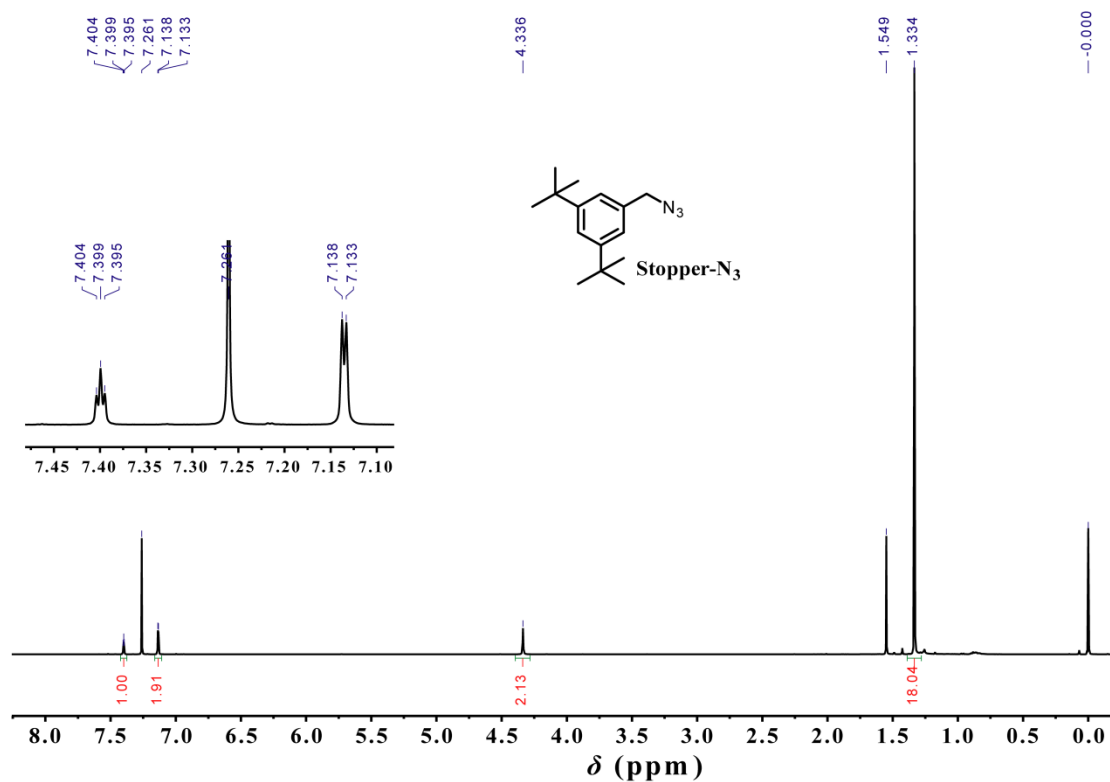

Figure S11 <sup>1</sup>H NMR spectrum of Stopper-N<sub>3</sub> (400 MHz, CDCl<sub>3</sub>, 298 K).

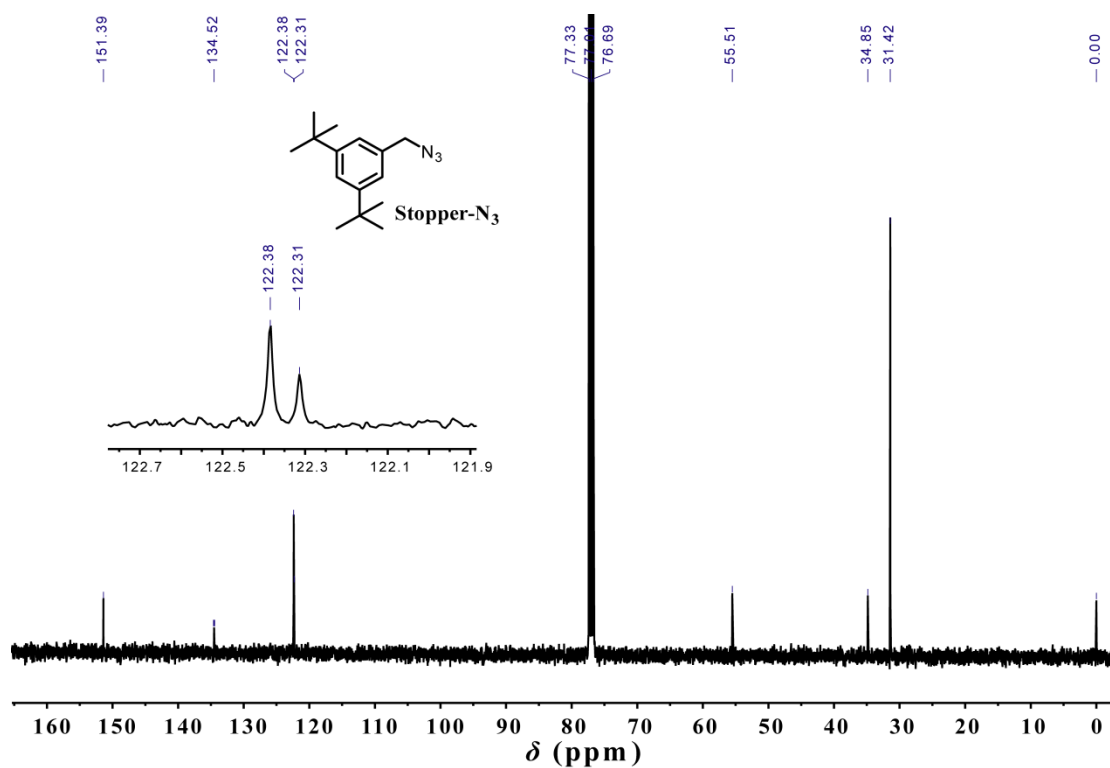

Figure S12 <sup>13</sup>C NMR spectrum of Stopper-N<sub>3</sub> (100 MHz, CDCl<sub>3</sub>, 298 K).

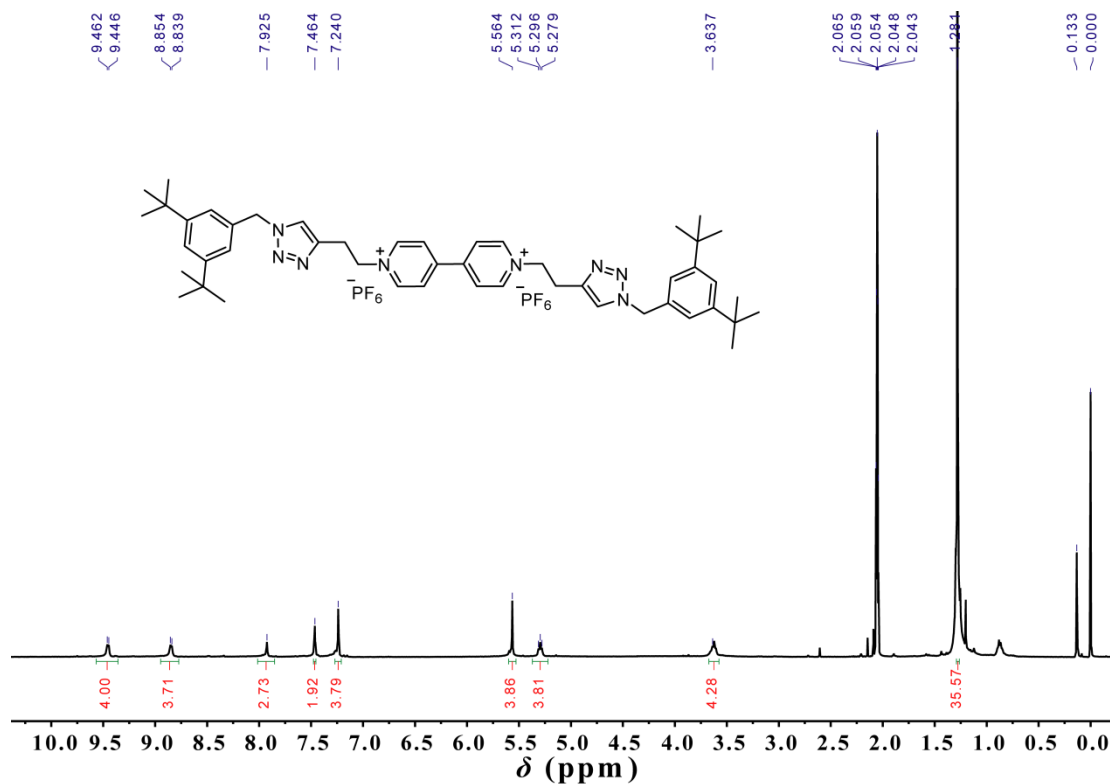

Figure S13  $^1\text{H}$  NMR spectrum of Axle-1 (400 MHz,  $\text{CD}_3\text{COCD}_3$ , 298 K).

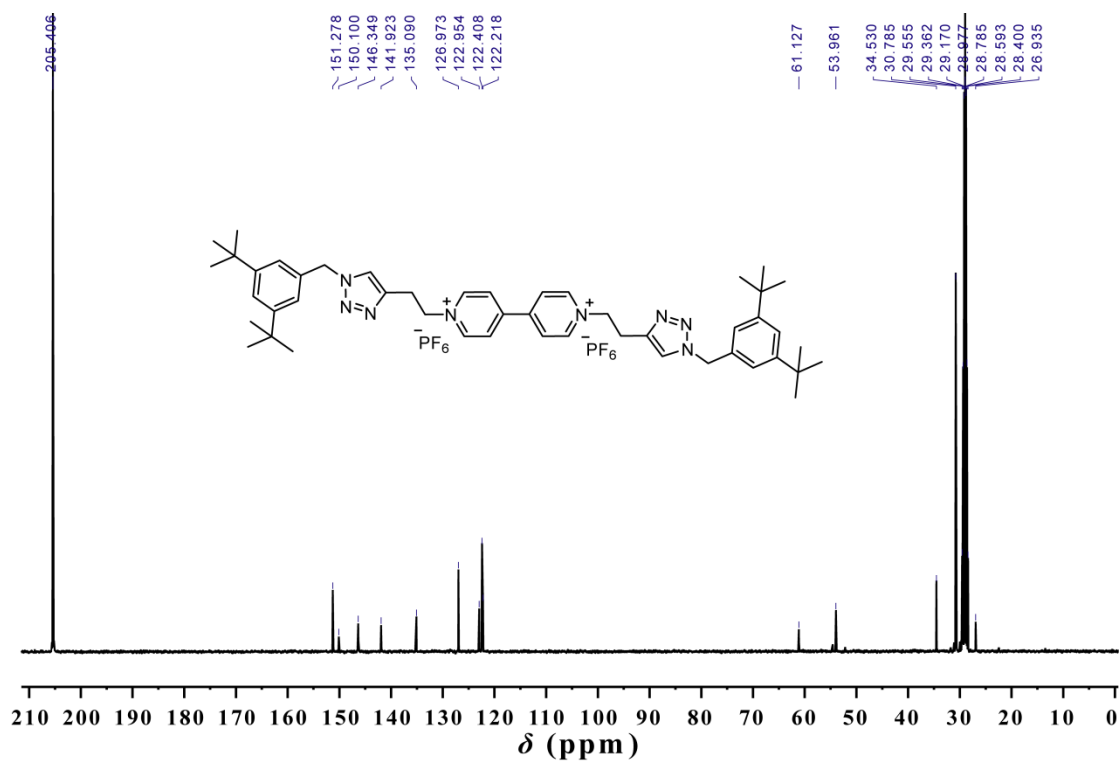

Figure S14  $^{13}\text{C}$  NMR spectrum of Axle-1 (100 MHz,  $\text{CD}_3\text{COCD}_3$ , 298 K).



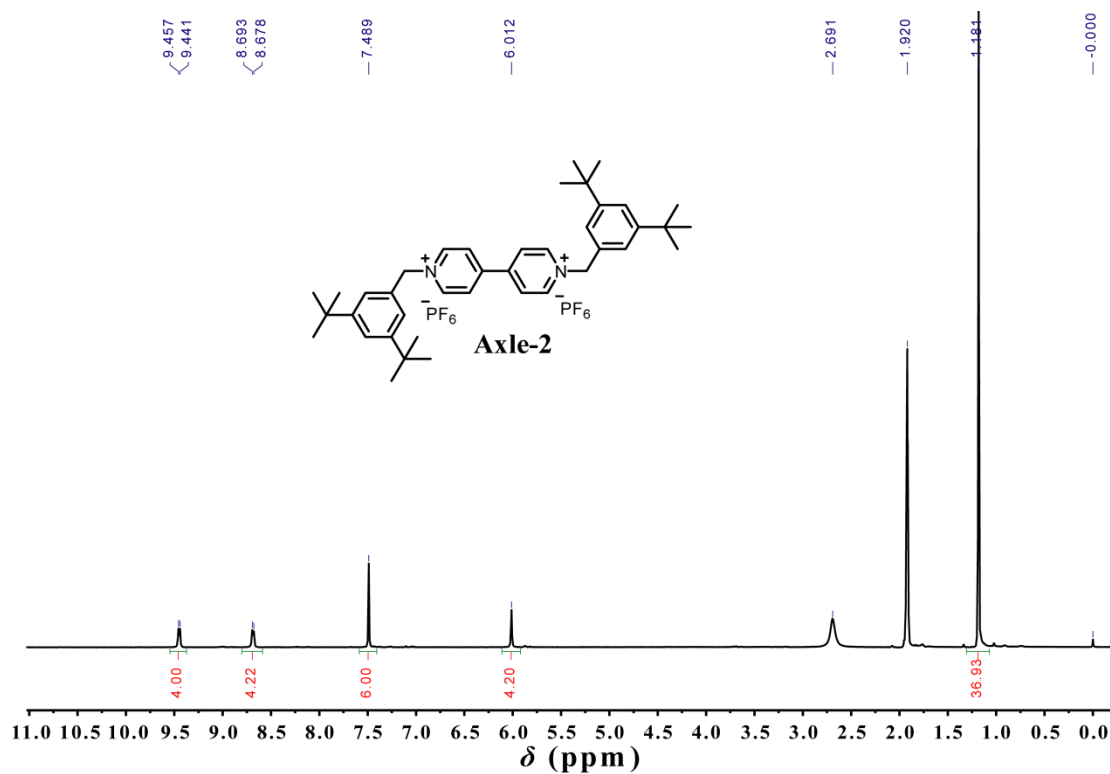

Figure S15  $^1\text{H}$  NMR spectrum of Axle-2 (400 MHz,  $\text{CD}_3\text{COCD}_3$ , 298 K).

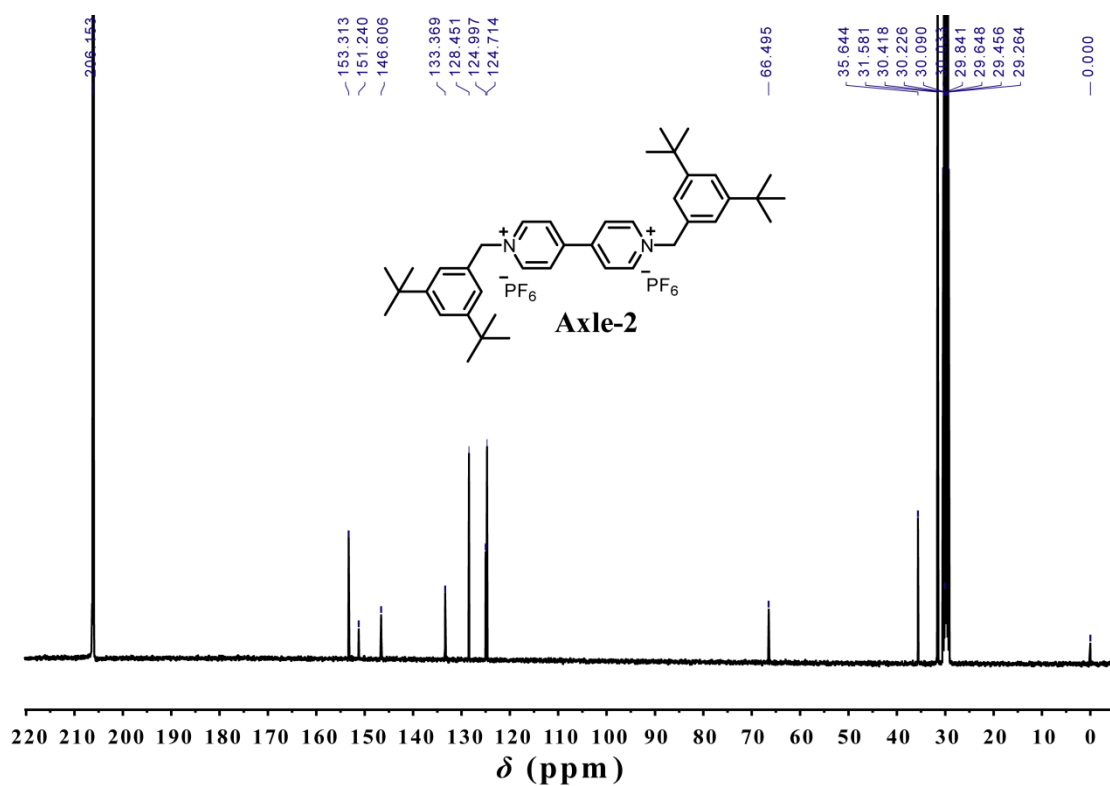

Figure S16  $^{13}\text{C}$  NMR spectrum of Axle-2 (100 MHz,  $\text{CD}_3\text{COCD}_3$ , 298 K).

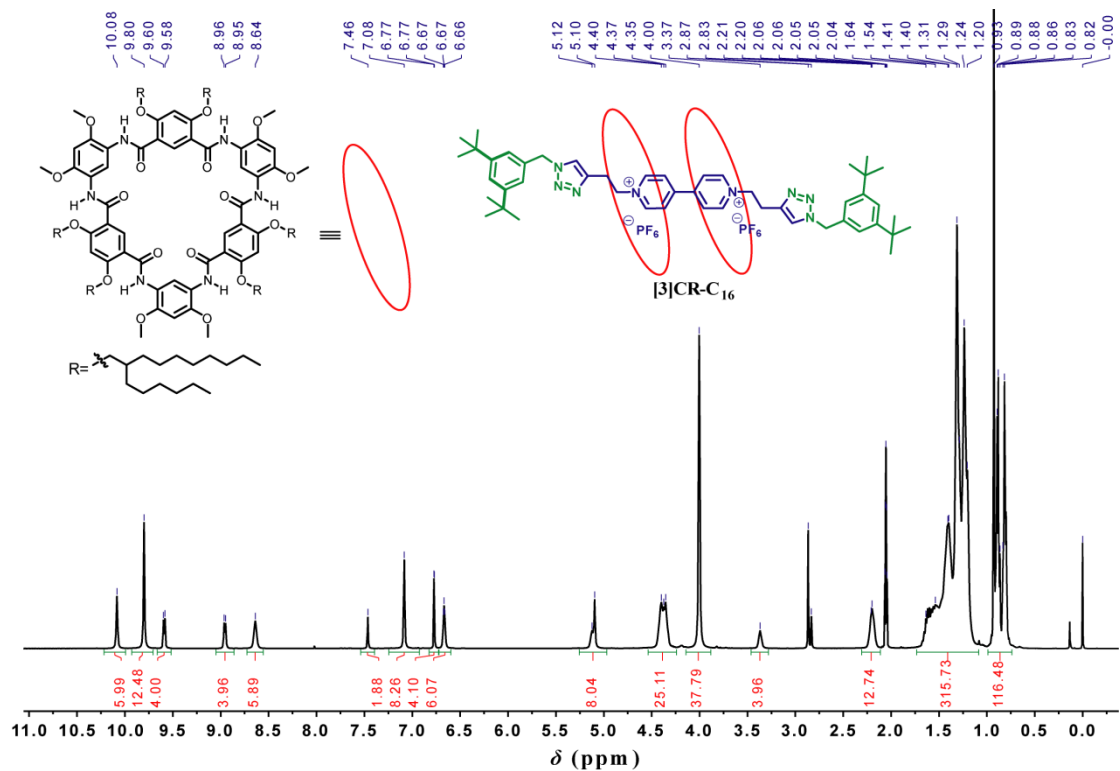

Figure S17  $^1\text{H}$  NMR spectrum of  $[3]\text{CR-C}_{16}$  (400 MHz,  $\text{CD}_3\text{COCD}_3$ , 298 K).

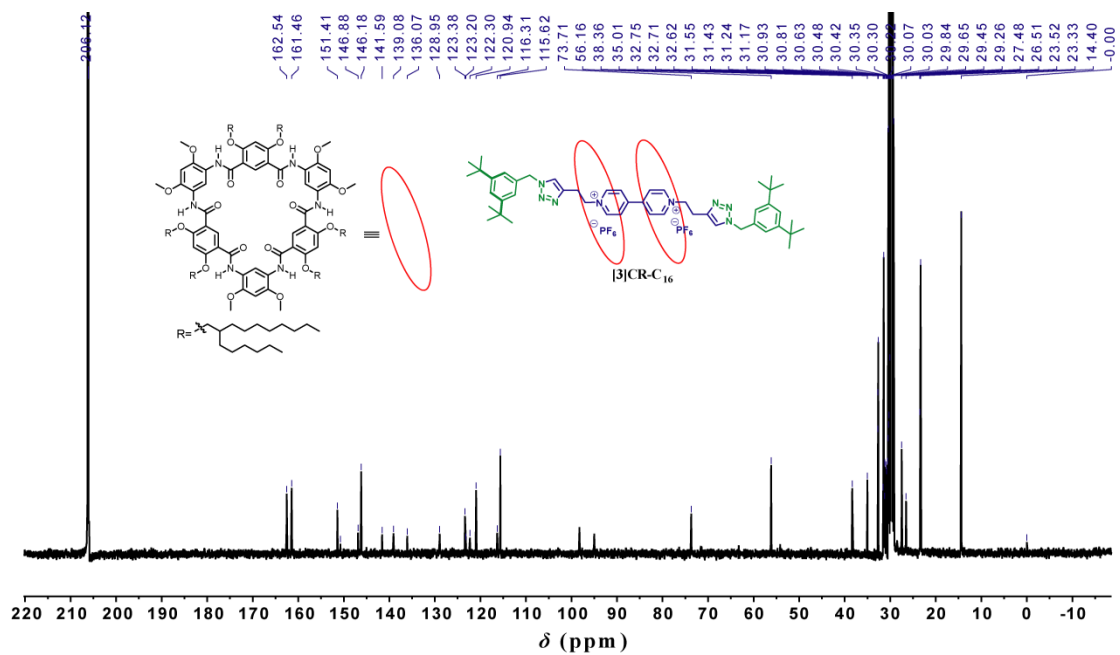

Figure S18  $^{13}\text{C}$  NMR spectrum of compound  $[3]\text{CR-C}_{16}$  (100 MHz,  $\text{CD}_3\text{COCD}_3$ , 298 K).

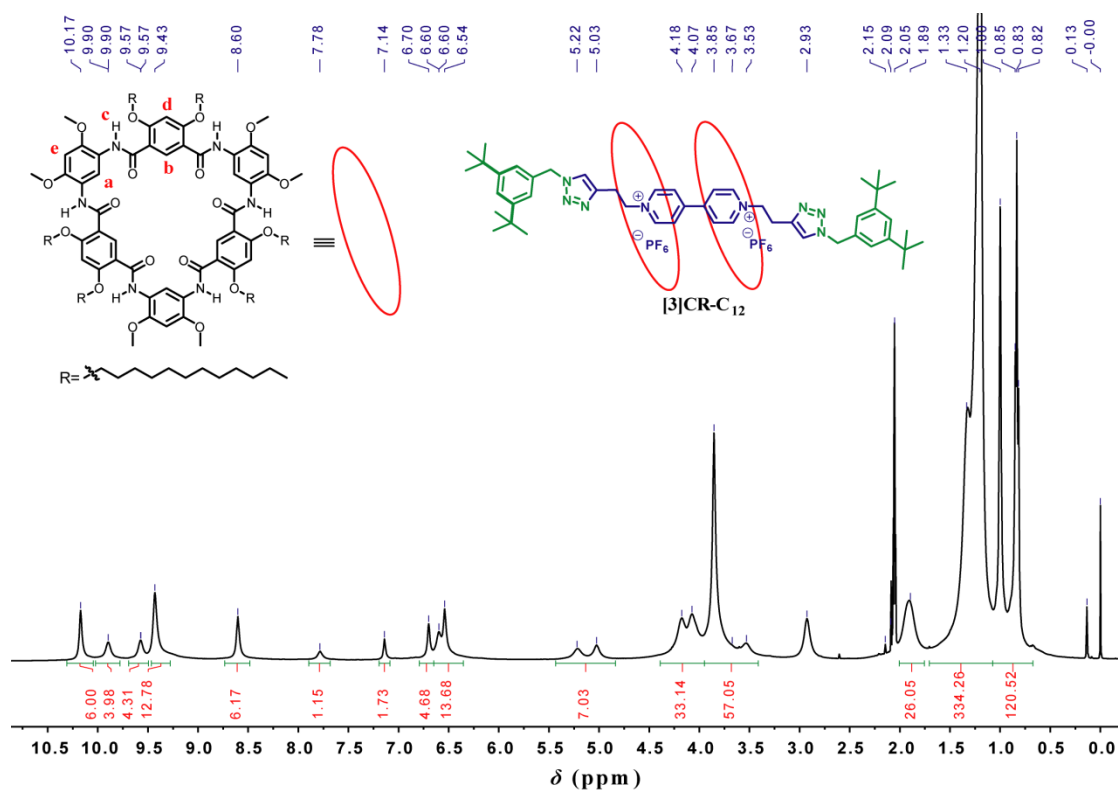

Figure S19  $^1\text{H}$  NMR spectrum of  $[3]\text{CR-C}_{12}$  (400 MHz,  $\text{CD}_3\text{COCD}_3$ , 298 K).

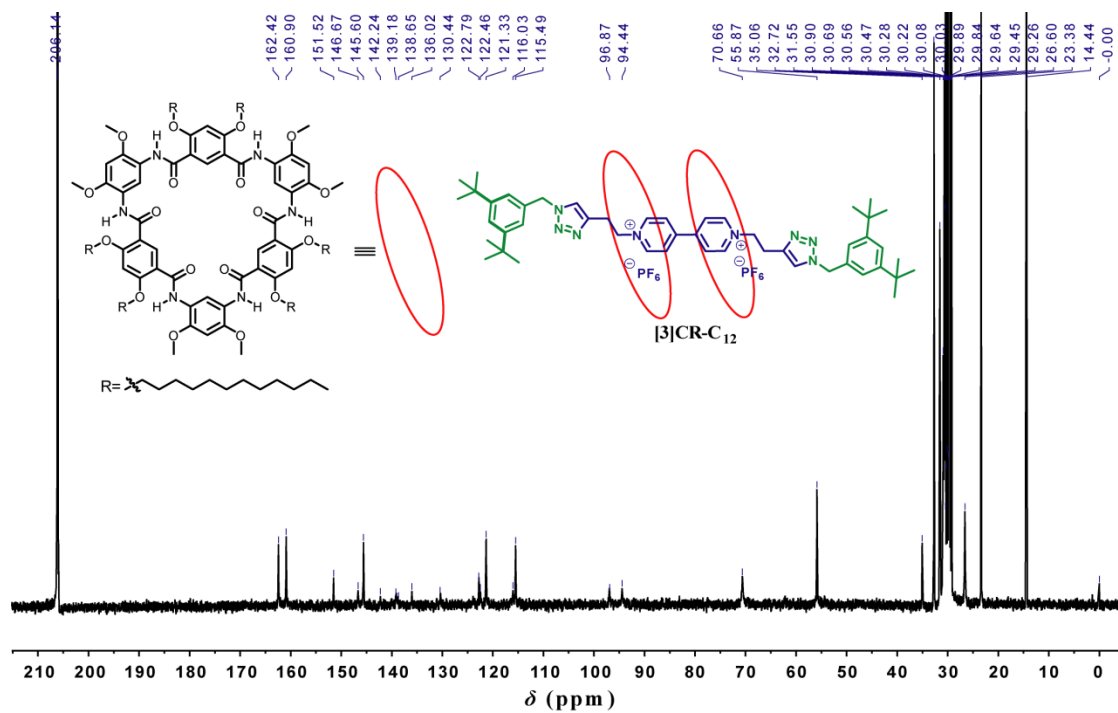

Figure S20  $^{13}\text{C}$  NMR spectrum of compound  $[3]\text{CR-C}_{12}$  (100 MHz,  $\text{CD}_3\text{COCD}_3$ , 298 K).

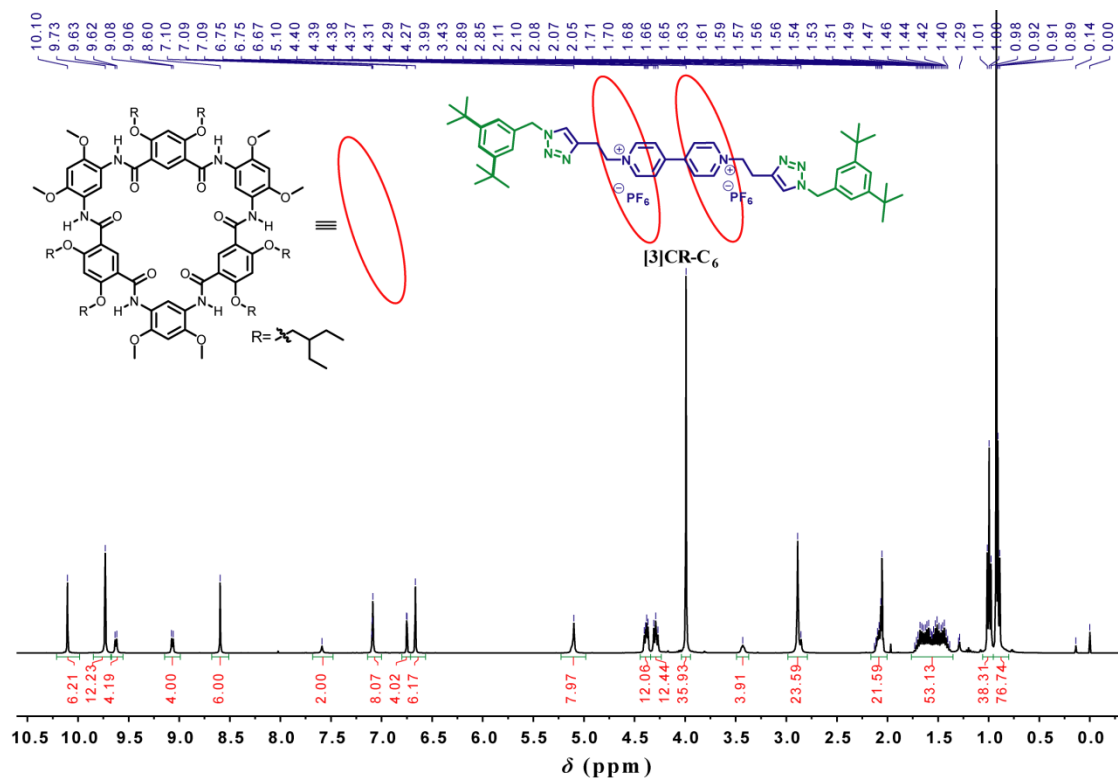

Figure S21  $^1\text{H}$  NMR spectrum of  $[3]\text{CR-C}_6$  (400 MHz,  $\text{CD}_3\text{COCD}_3$ , 298 K).

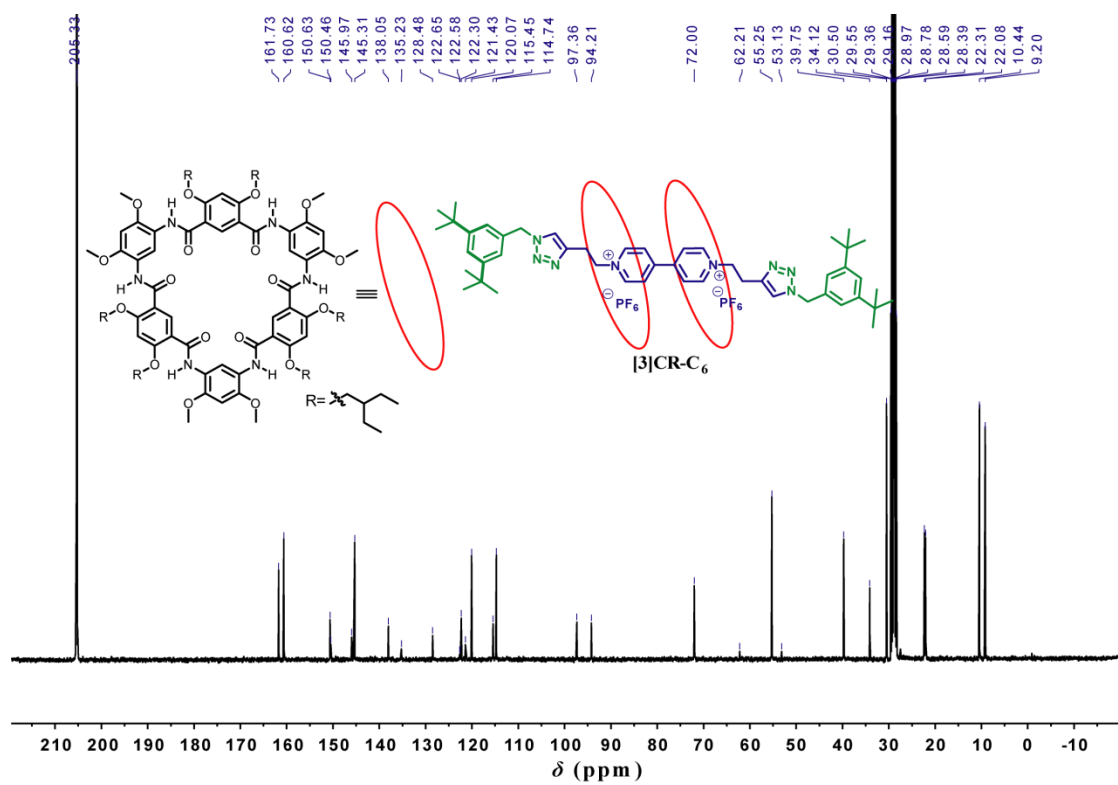

Figure S22  $^{13}\text{C}$  NMR spectrum of compound  $[3]\text{CR-C}_6$  (100 MHz,  $\text{CD}_3\text{COCD}_3$ , 298 K).

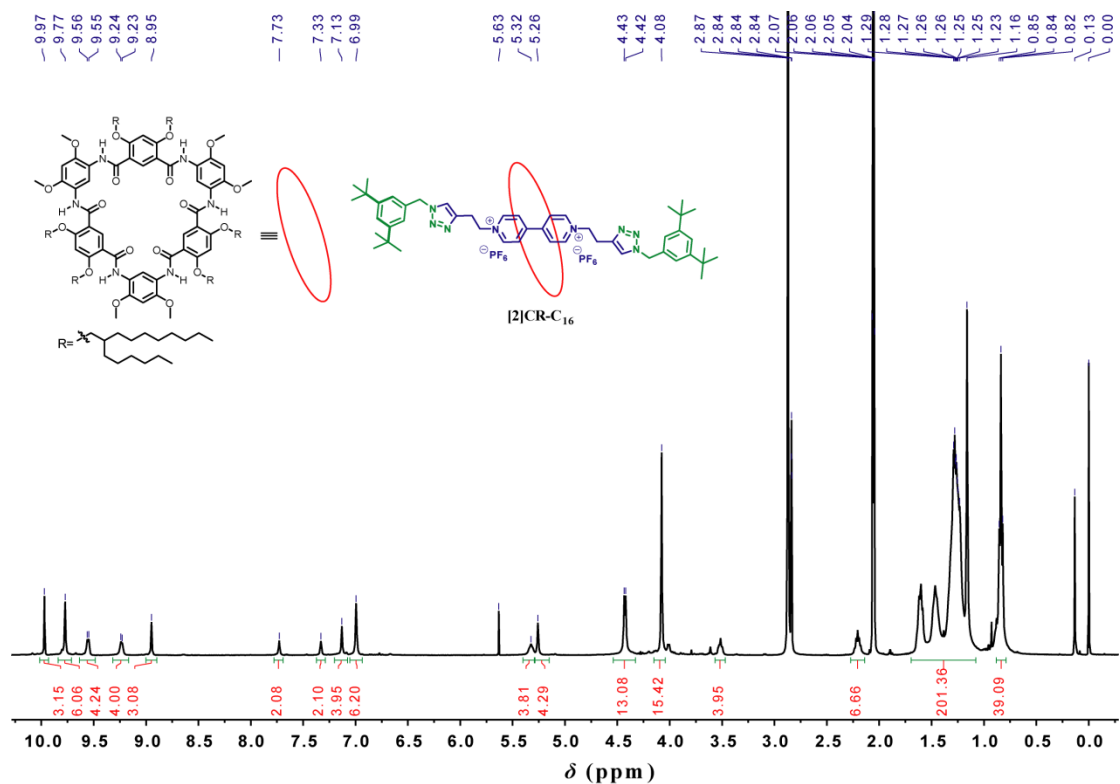

Figure S23  $^1\text{H}$  NMR spectrum of  $[2]\text{CR-C}_{16}$  (400 MHz,  $\text{CD}_3\text{COCD}_3$ , 298 K).

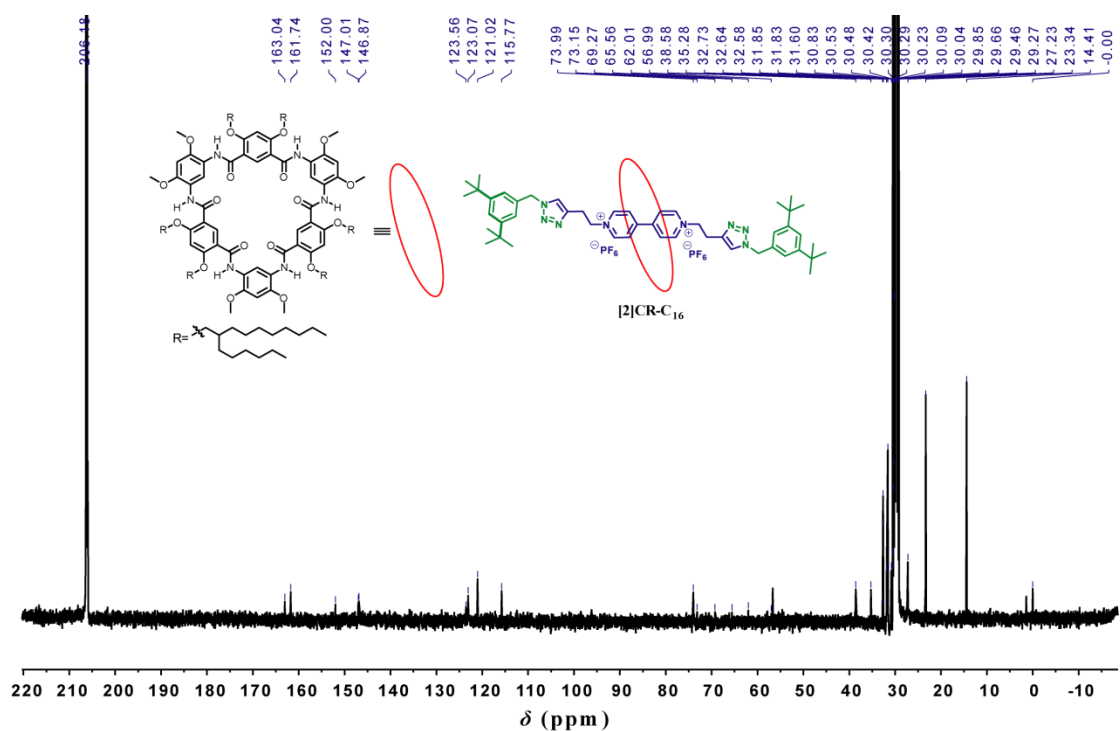

Figure S24  $^{13}\text{C}$  NMR spectrum of compound  $[2]\text{CR-C}_{16}$  (100 MHz,  $\text{CD}_3\text{COCD}_3$ , 298 K).

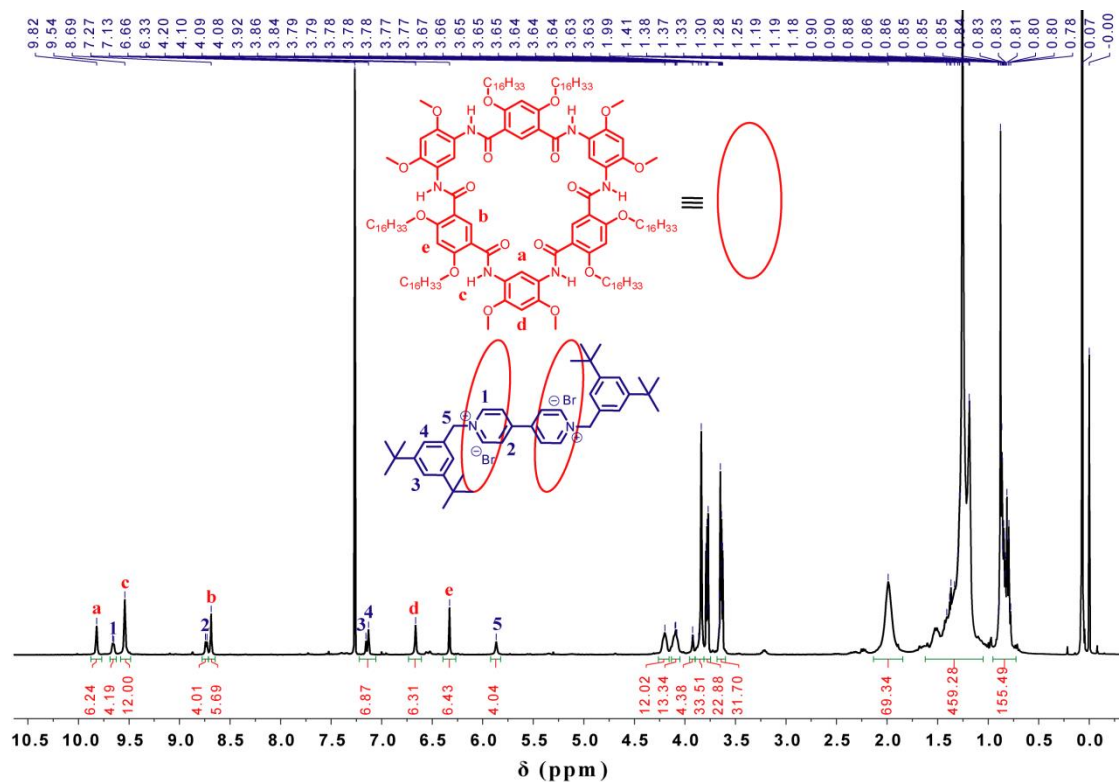

Figure S25  $^1\text{H}$  NMR spectrum of compound  $[3]\text{R-C}_{16}\text{-Br}$  (400 MHz,  $\text{CDCl}_3$ , 298 K).

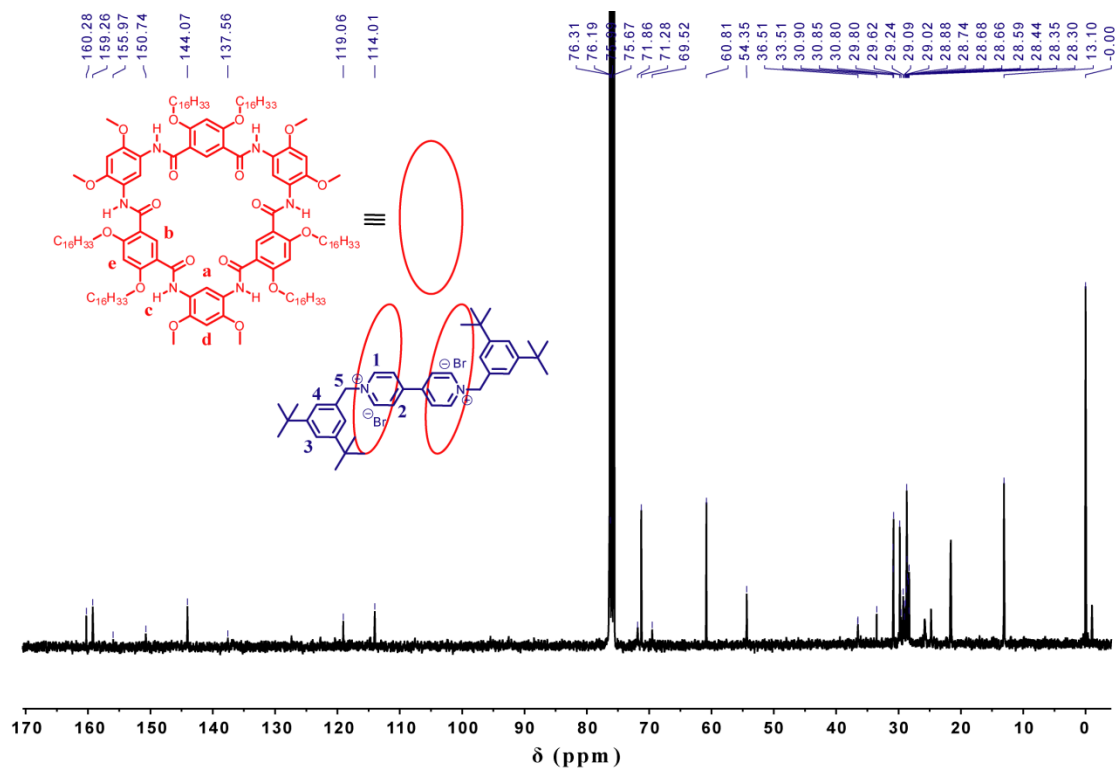

Figure S26  $^{13}\text{C}$  NMR spectrum of compound  $[3]\text{R-C}_{16}\text{-Br}$  (100 MHz,  $\text{CDCl}_3$ , 298 K).

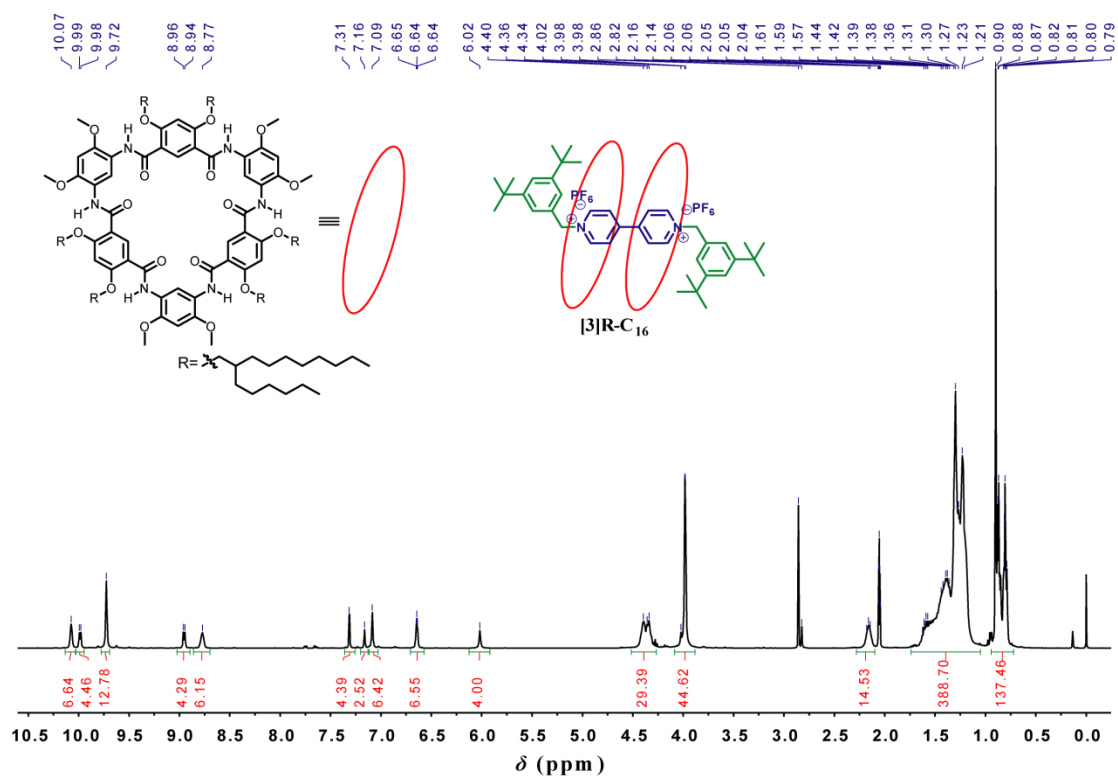

**Figure S27** <sup>1</sup>H NMR spectrum of compound **[3]R-C<sub>16</sub>** (400 MHz, CD<sub>3</sub>COCD<sub>3</sub>, 298 K).

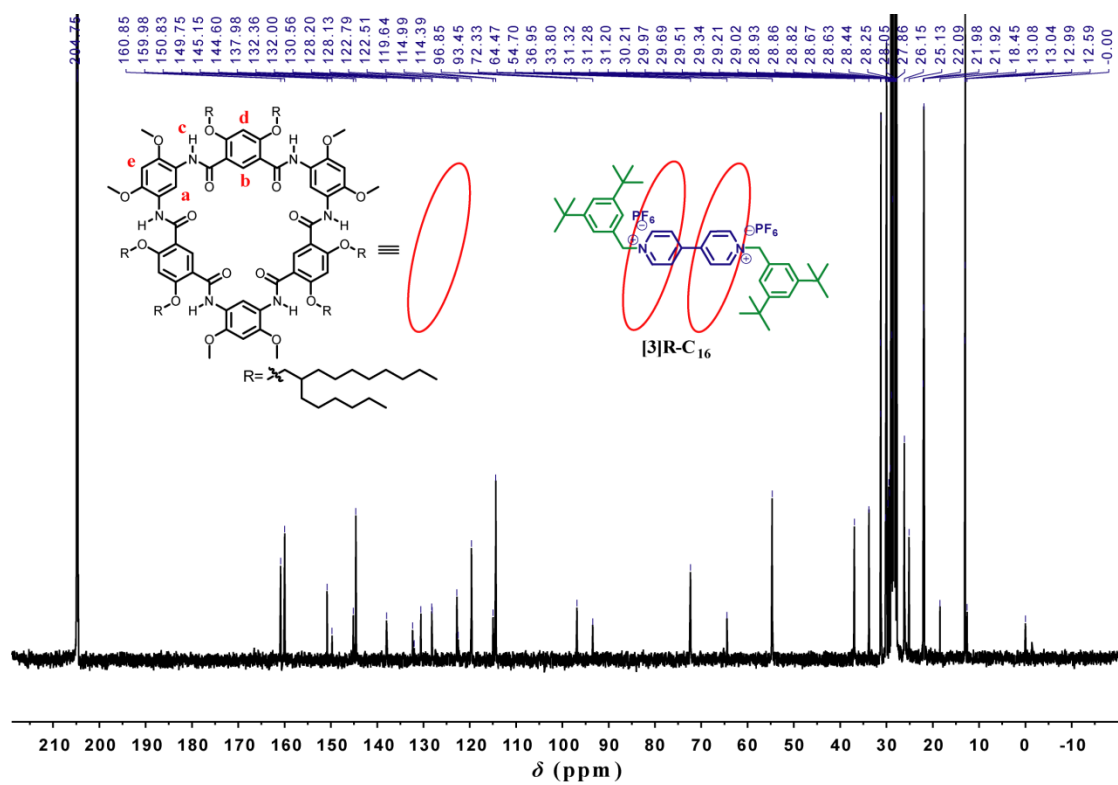

**Figure S28** <sup>13</sup>C NMR spectrum of compound **[3]R-C<sub>16</sub>** (100 MHz, CD<sub>3</sub>COCD<sub>3</sub>, 298 K).

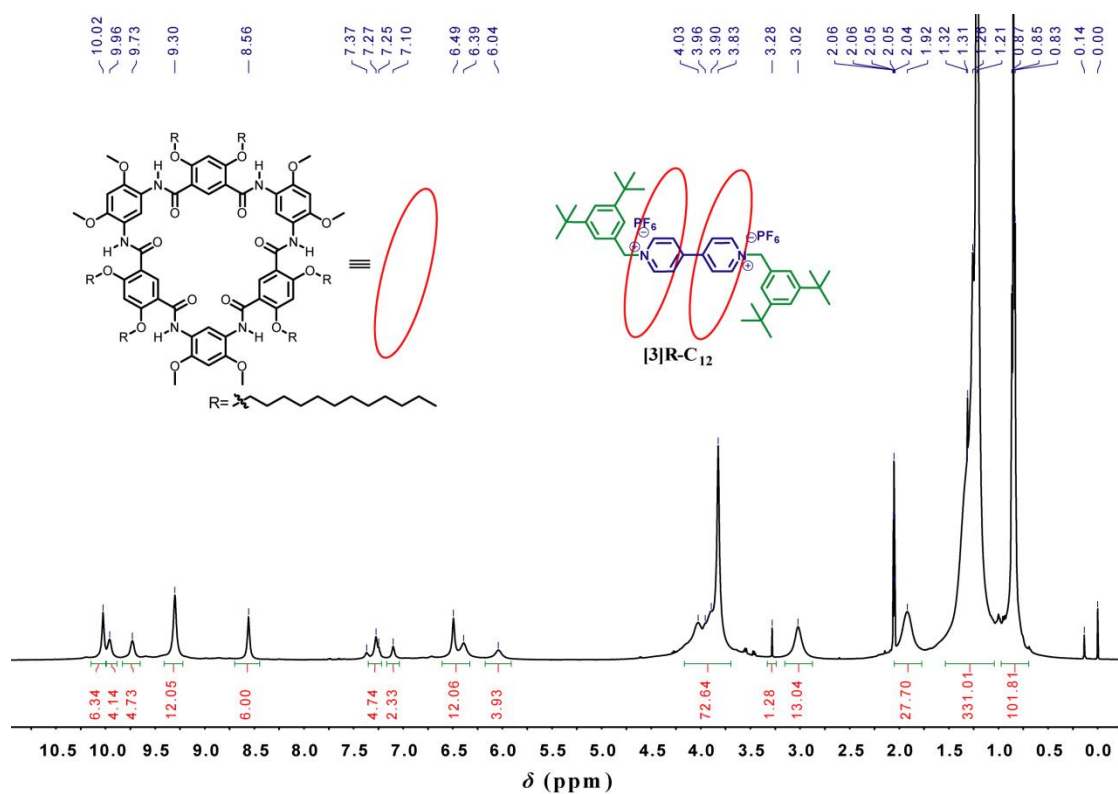

Figure S29 <sup>1</sup>H NMR spectrum of compound [3]R-C<sub>12</sub> (400 MHz, CD<sub>3</sub>COCD<sub>3</sub>, 298 K).

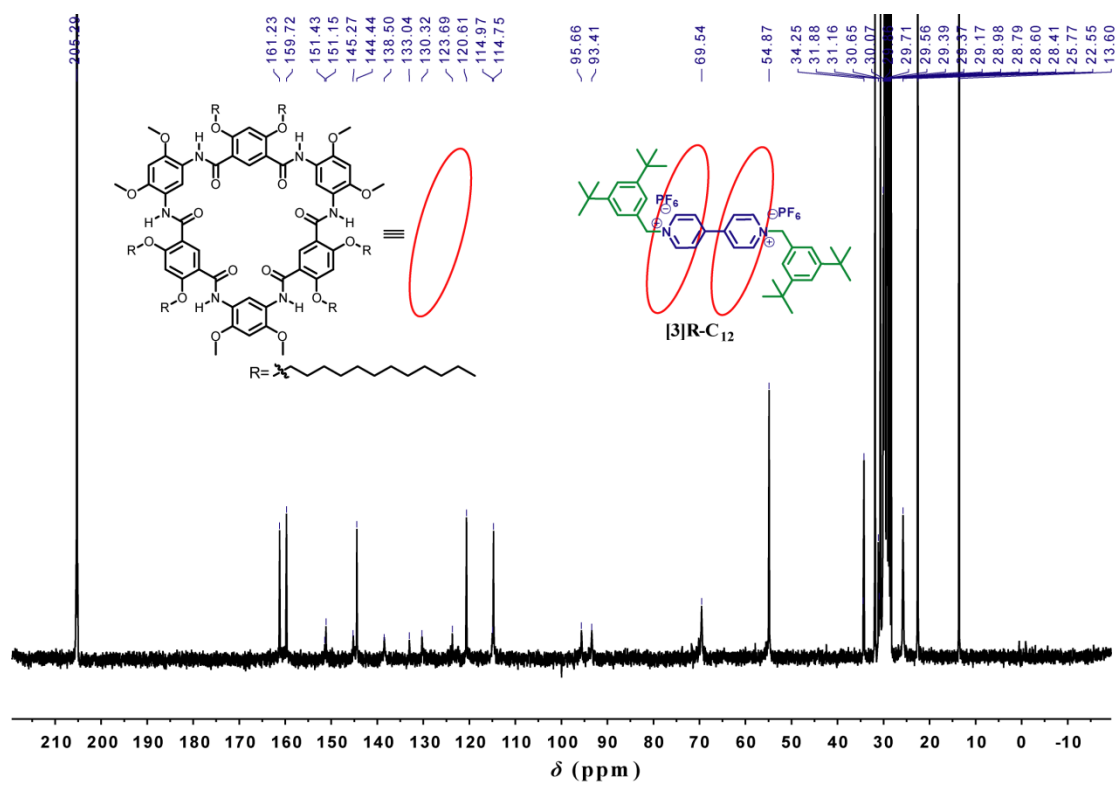

Figure S30 <sup>13</sup>C NMR spectrum of compound [3]R-C<sub>12</sub> (100 MHz, CD<sub>3</sub>COCD<sub>3</sub>, 298 K).



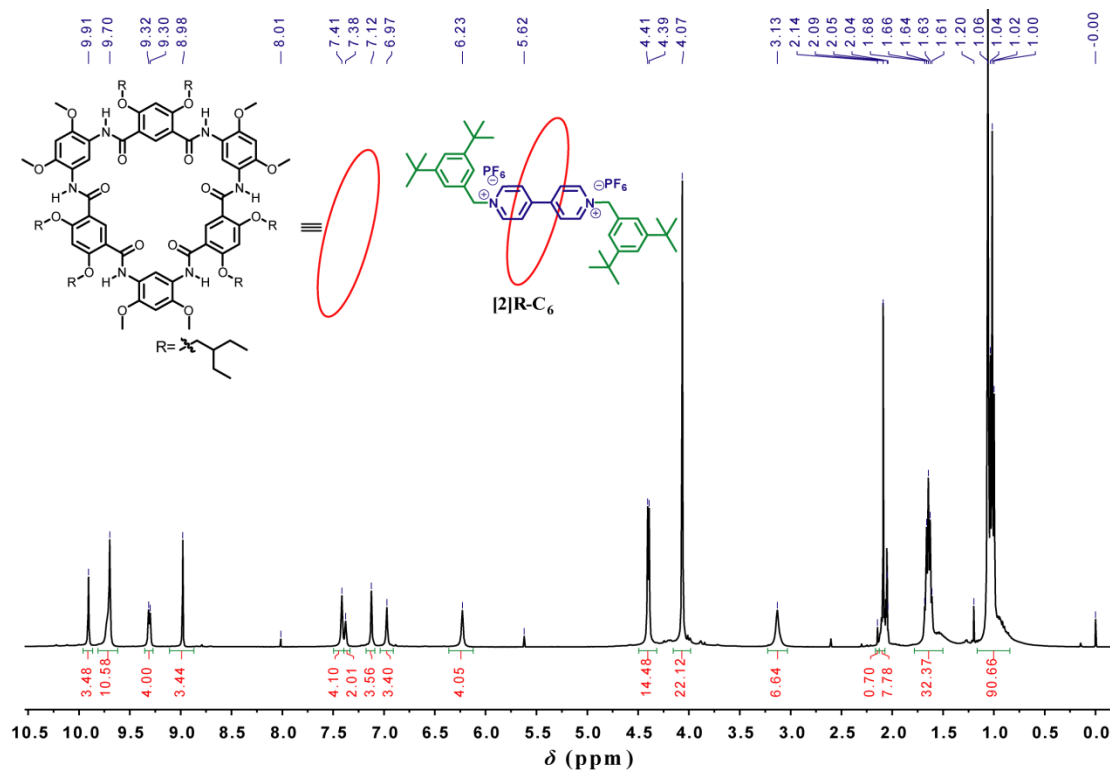

Figure S31  $^1\text{H}$  NMR spectrum of compound  $[2]\text{R-C}_6$  (400 MHz,  $\text{CD}_3\text{COCD}_3$ , 298 K).

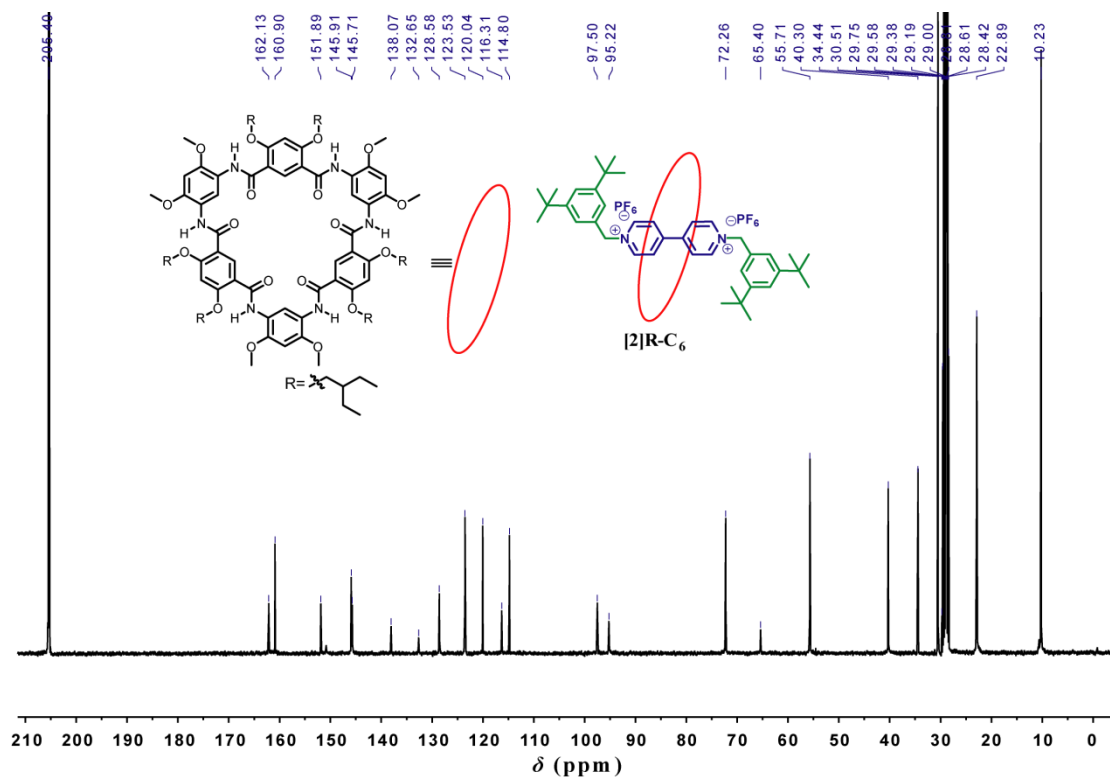

Figure S32  $^{13}\text{C}$  NMR spectrum of compound  $[2]\text{R-C}_6$  (100 MHz,  $\text{CD}_3\text{COCD}_3$ , 298 K).

### 3.2 MALDI-TOF-MS or HRESI-MS Spectra of Novel Compounds

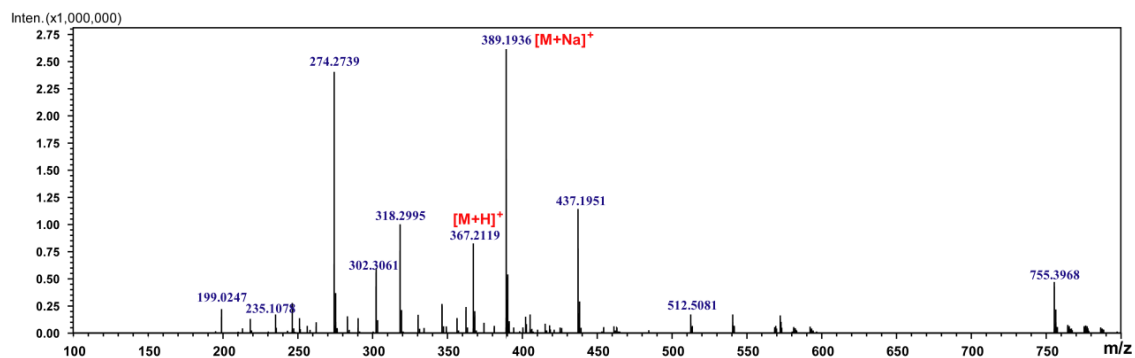

Figure S33 HRESI-MS spectrum of compound 5.

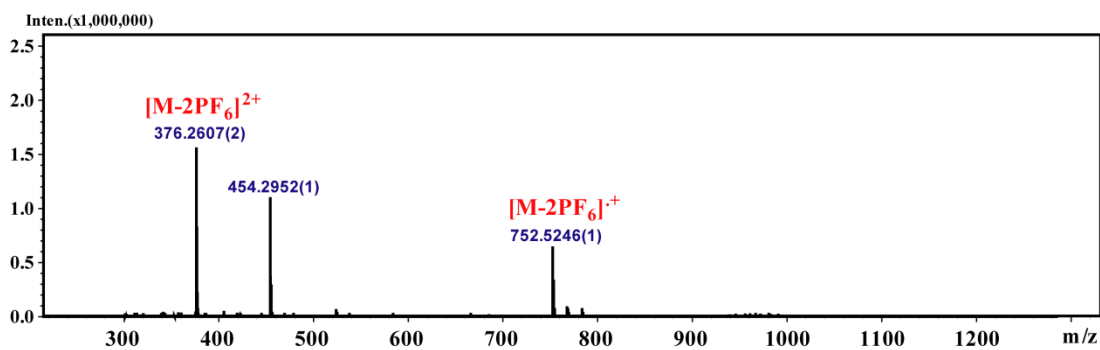

Figure S34 HRESI-MS spectrum of Axle-1.

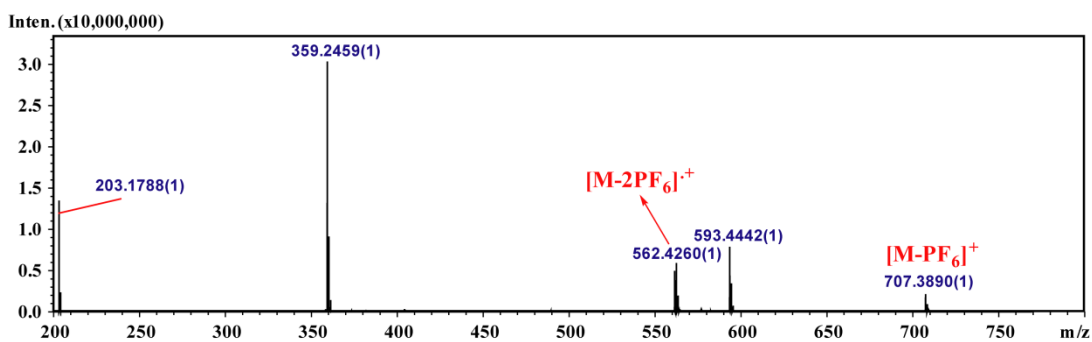

Figure S35 HRESI-MS spectrum of Axle-2.

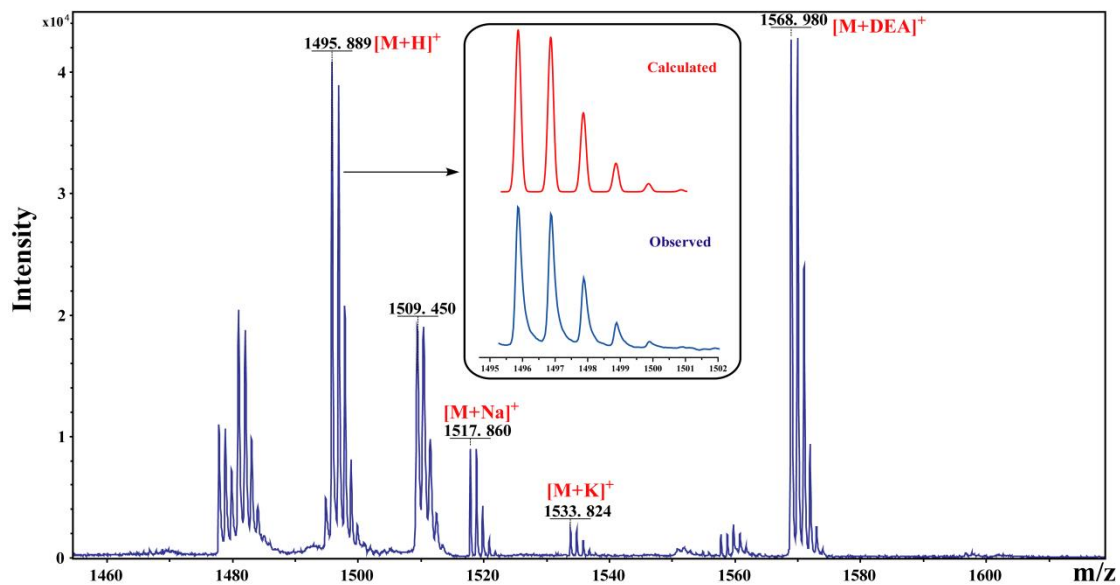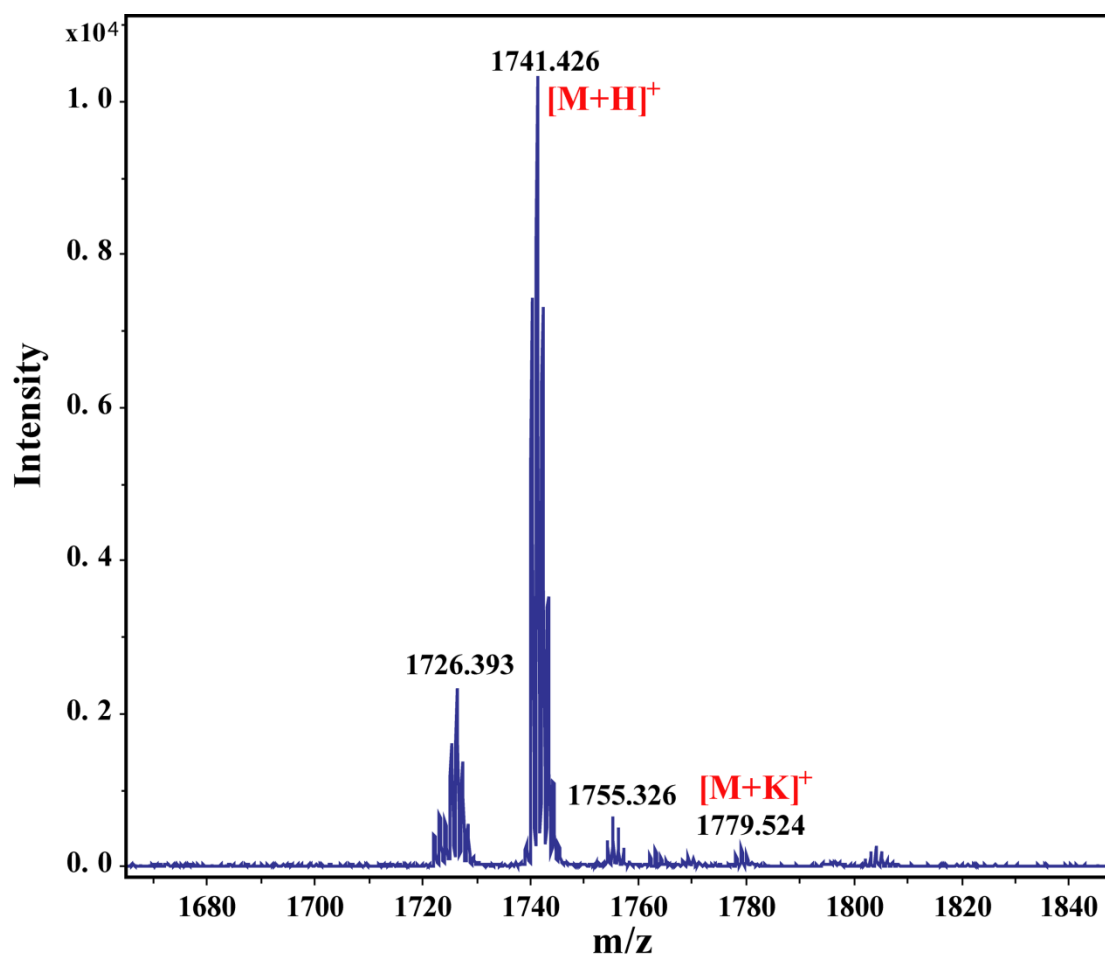

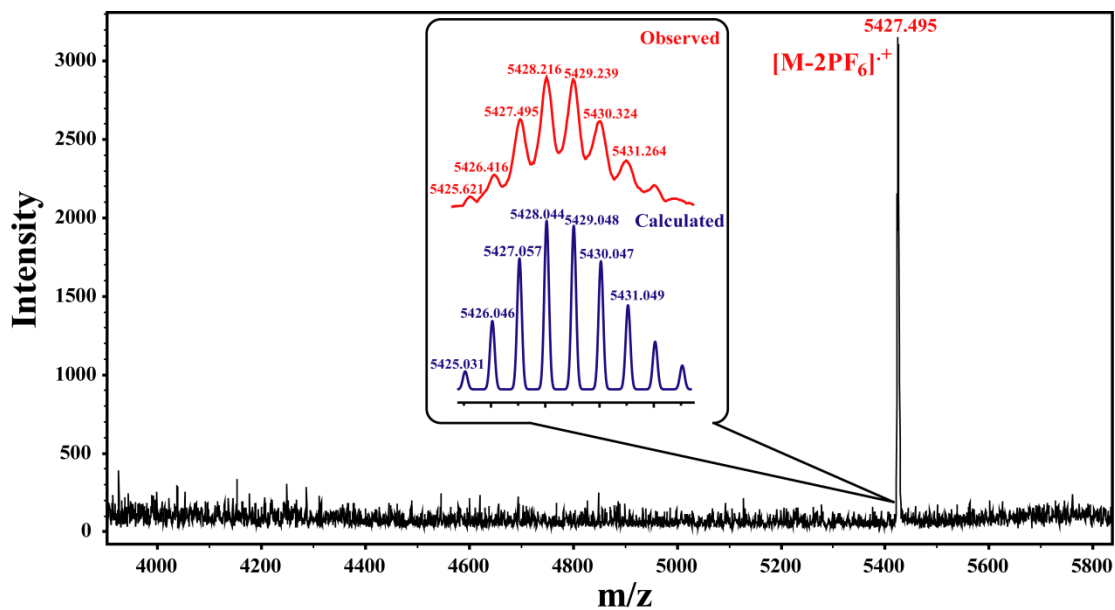

Figure S38 MALDI-TOF mass spectrum of [3]CR-C<sub>16</sub> (inset: experimental isotope distribution (red) and computer simulation (blue)).

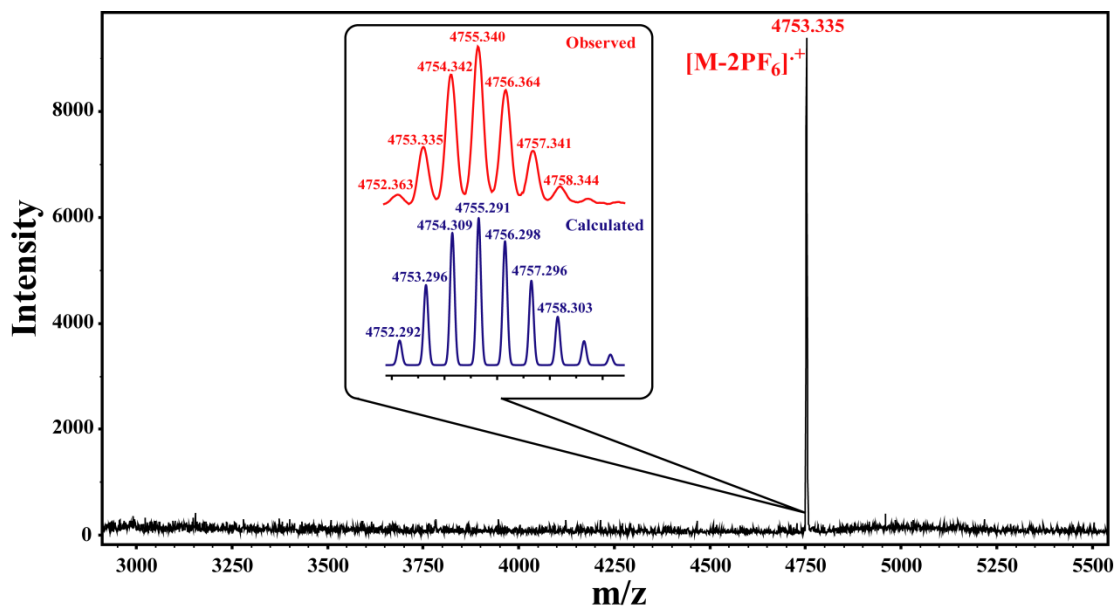

Figure S39 MALDI-TOF mass spectrum of [3]CR-C<sub>12</sub> (inset: experimental isotope distribution (red) and computer simulation (blue)).

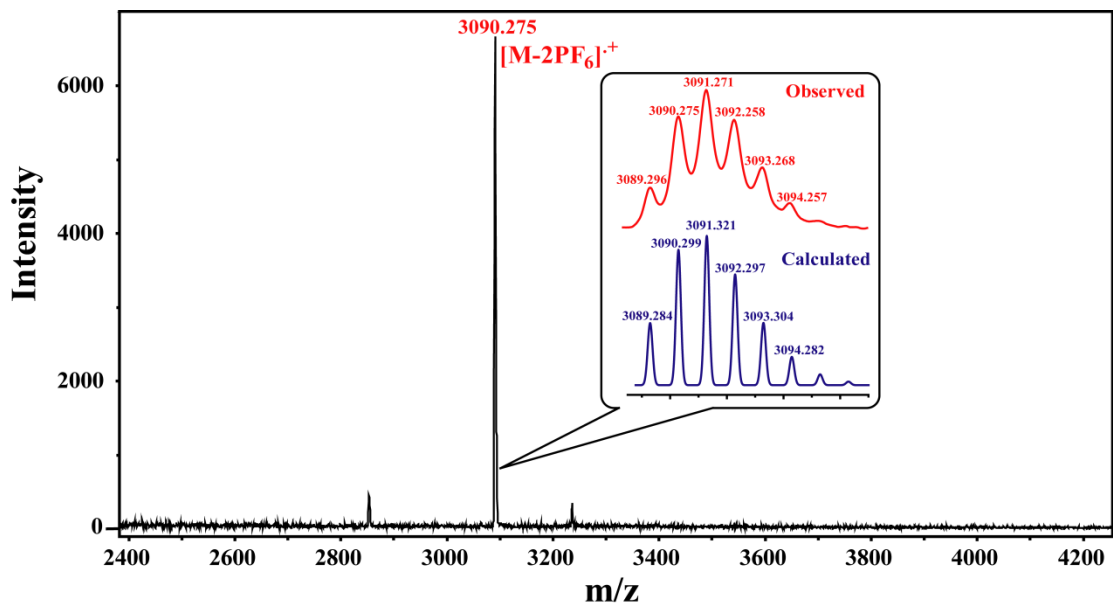

Figure S40 MALDI-TOF mass spectrum of [2]CR-C<sub>16</sub> (inset: experimental isotope distribution (red) and computer simulation (blue)).

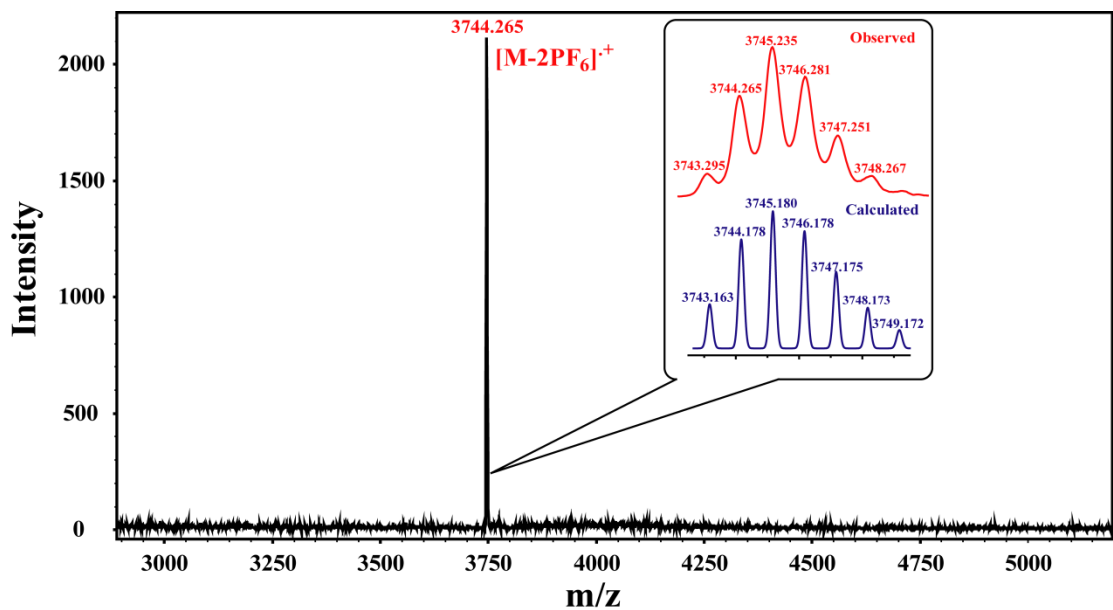

Figure S41 MALDI-TOF mass spectrum of [3]CR-C<sub>6</sub> (inset: experimental isotope distribution (red) and computer simulation (blue)).

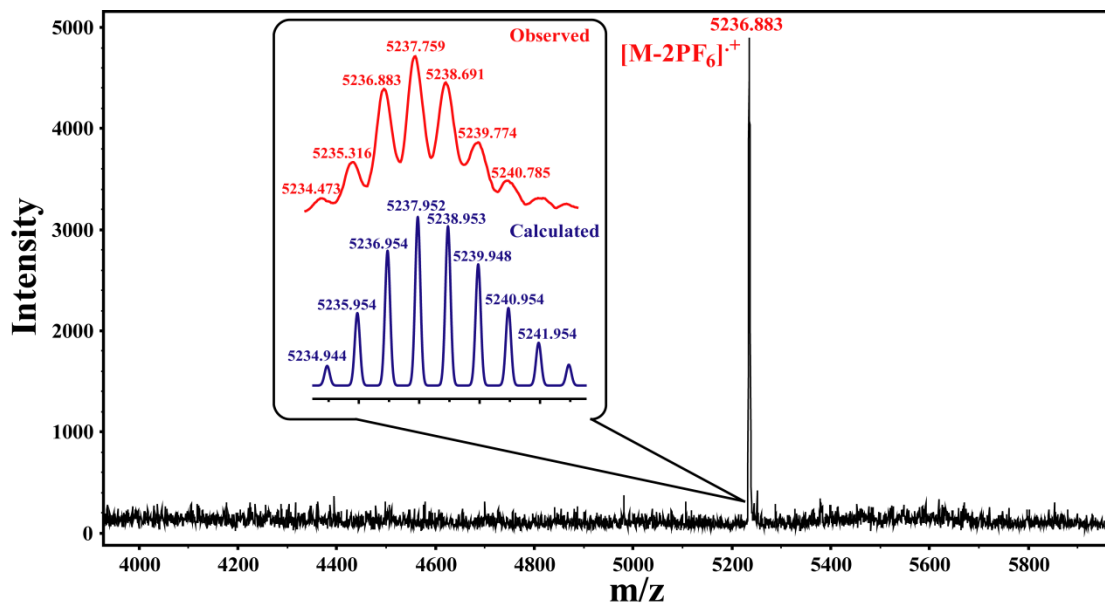

Figure S42 MALDI-TOF mass spectrum of **[3]R-C<sub>16</sub>** (inset: experimental isotope distribution (red) and computer simulation (blue)).

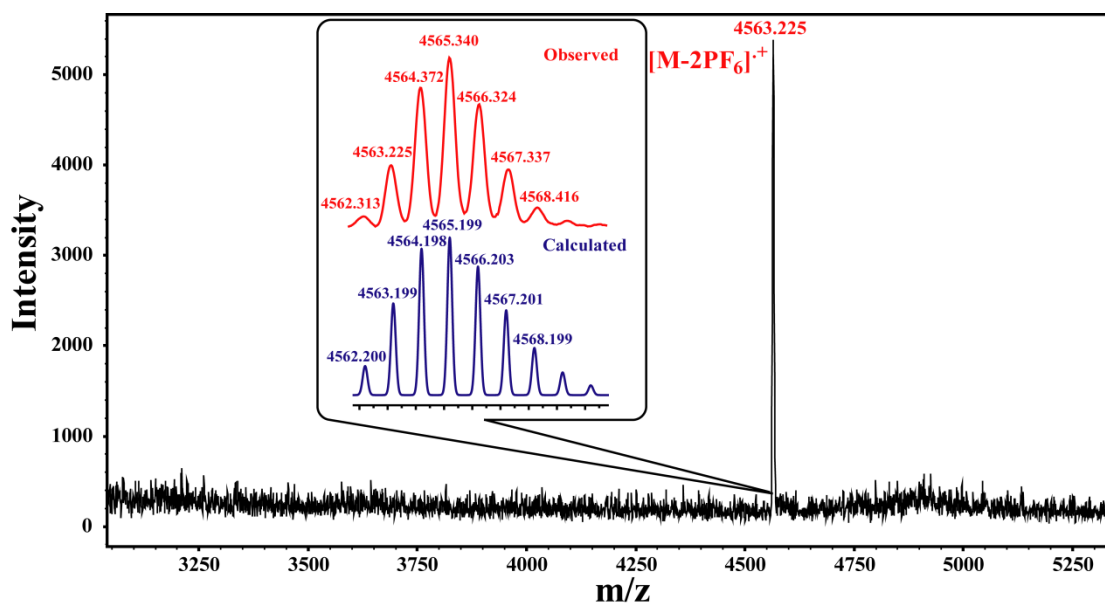

Figure S43 MALDI-TOF mass spectrum of **[3]R-C<sub>12</sub>** (inset: experimental isotope distribution (red) and computer simulation (blue)).

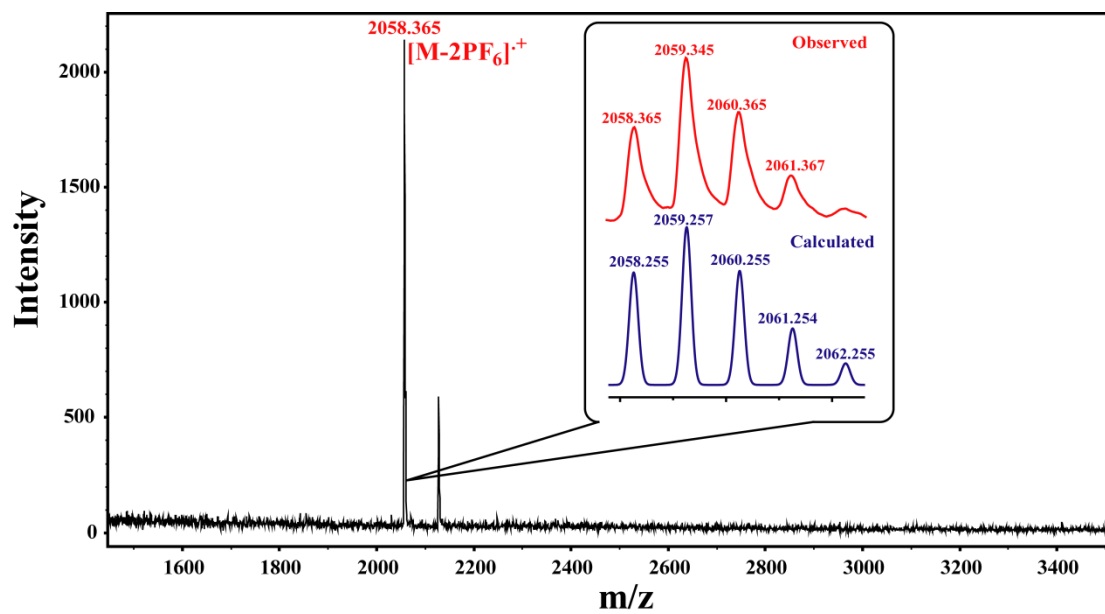

**Figure S44** MALDI-TOF mass spectrum of **[2]R-C<sub>6</sub>** (inset: experimental isotope distribution (red) and computer simulation (blue)).

## 4. Host-Guest Complexation of **1** and G1-G4

### 4.1 NMR Spectra of Complexation

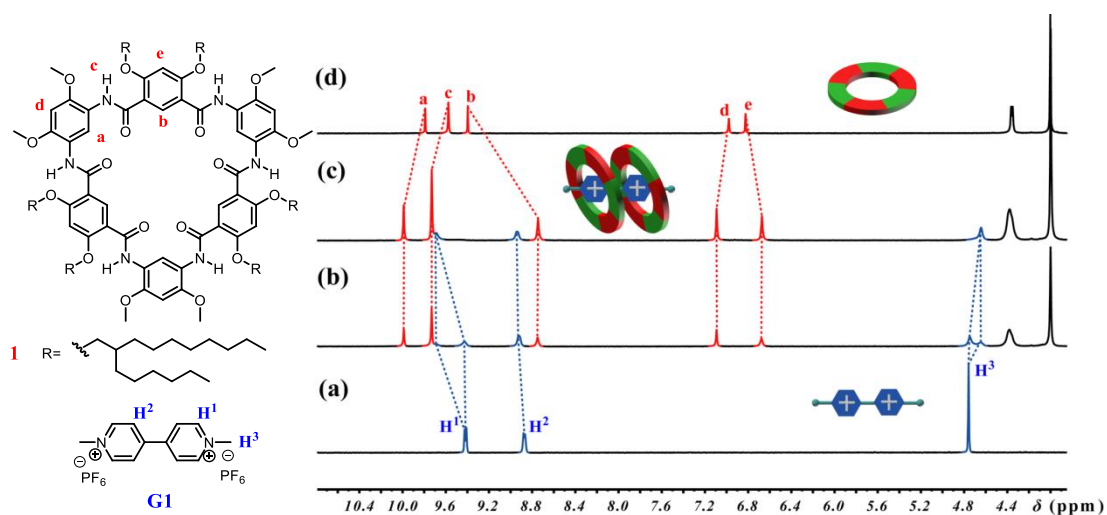

**Figure S45** Partial  $^1\text{H}$  NMR spectra (400 MHz, acetone- $d_6$ , 298 K) of (a) 2.0 mM **G1**, (b) 2.0 mM **1** and **G1**, (c) 4.0 mM **1** and 2.0 mM **G1**, (d) 2.0 mM **1**.

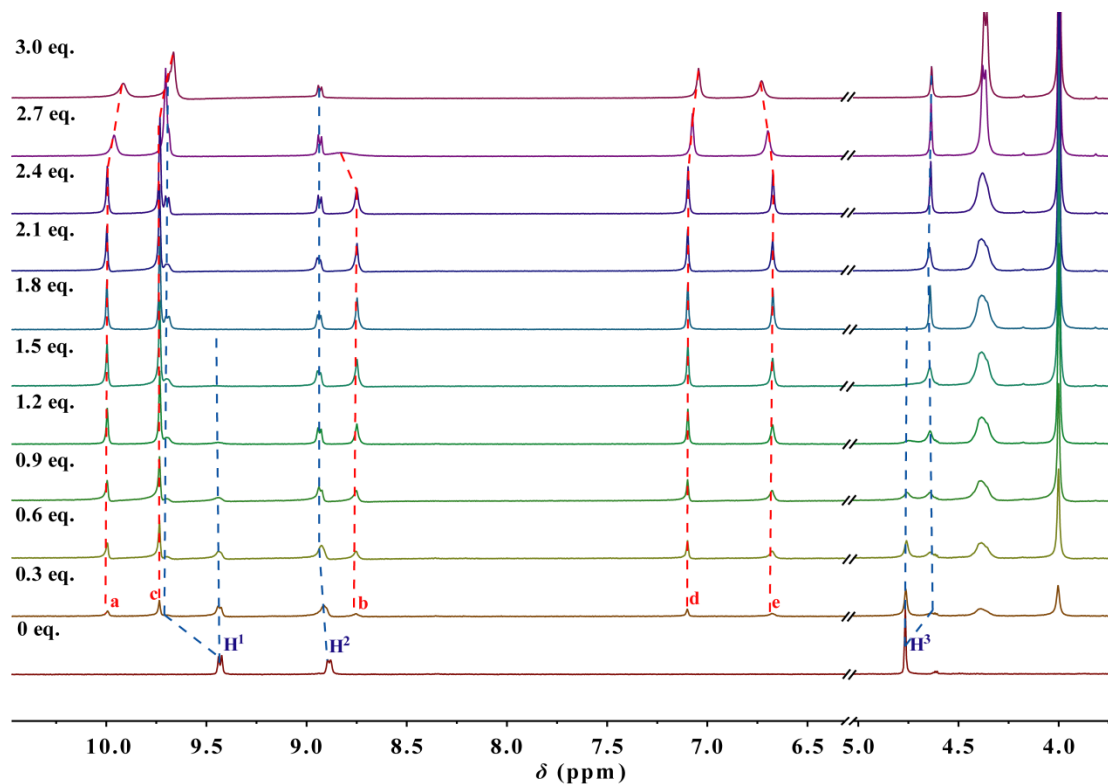

**Figure S46** Stacked plots of  $^1\text{H}$  NMR spectra of **G1** (1 mM) titrated with **1** (0-3.0 mM) in acetone- $d_6$  (400 MHz, 298 K).



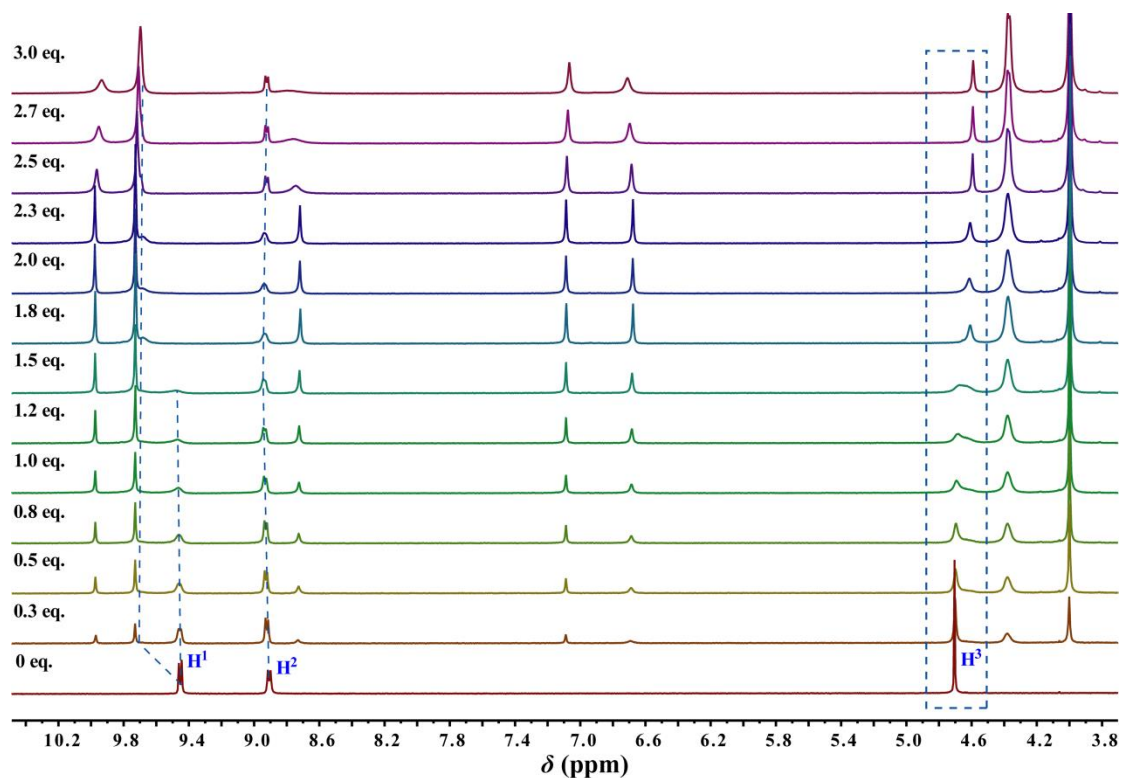

**Figure S47** Stacked plots of  $^1\text{H}$  NMR spectra of **G1** (1 mM) titrated with **1** (0-3.0 mM) in acetone- $\text{d}_6$ /DMSO- $\text{d}_6$  (9/1, v/v) (400 MHz, 298 K).

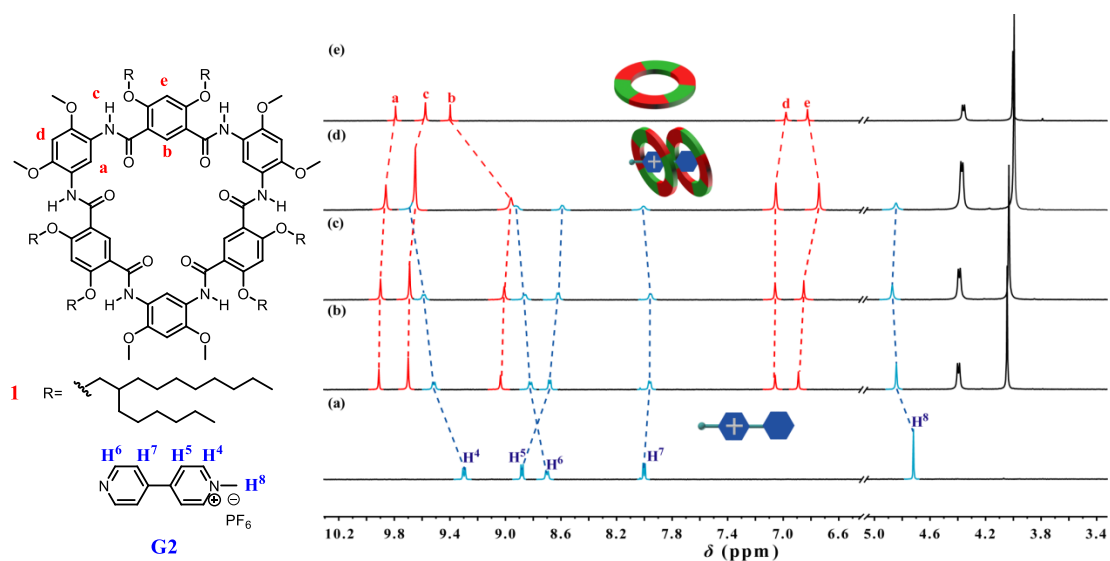

**Figure S48** Partial  $^1\text{H}$  NMR spectra (400 MHz, acetone- $\text{d}_6$ , 298 K) of (a) 1.0 mM **G2**, (b) 0.5 mM **1** and 1.0 mM **G2**, (c) 1.0 mM **1** and 1.0 mM **G2**, (d) 2.0 mM **1** and 1.0 mM **G2**, (e) 1.0 mM **1**.

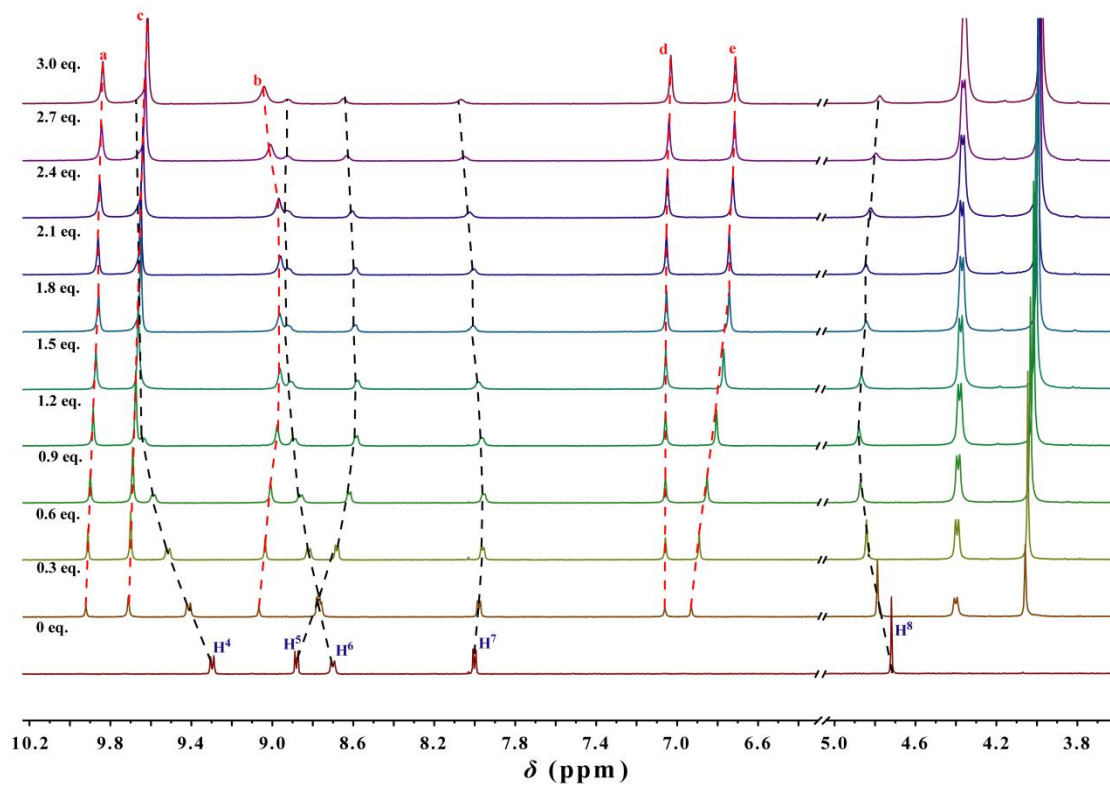

**Figure S49** Stacked plots of  $^1\text{H}$  NMR spectra of **G2** (1 mM) titrated with **1** (0-3.0 mM) in acetone- $\text{d}_6$  (400 MHz, 298 K).

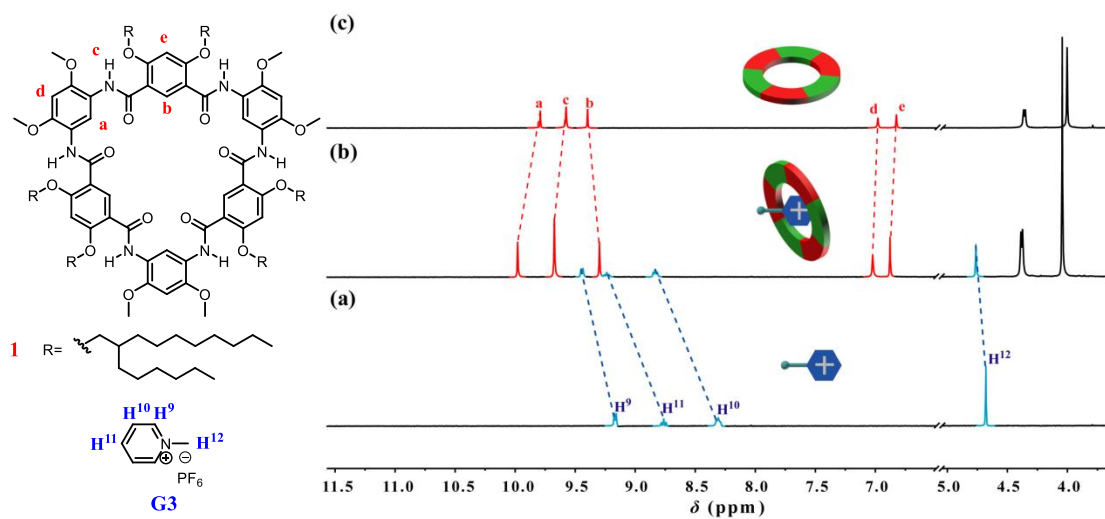

**Figure S50** Partial  $^1\text{H}$  NMR spectra (400 MHz, acetone- $\text{d}_6$ , 298 K) of (a) 1.0 mM **G3**, (b) 1.0 mM **1** and 1.0 mM **G3**, (c) 1.0 mM **1**.

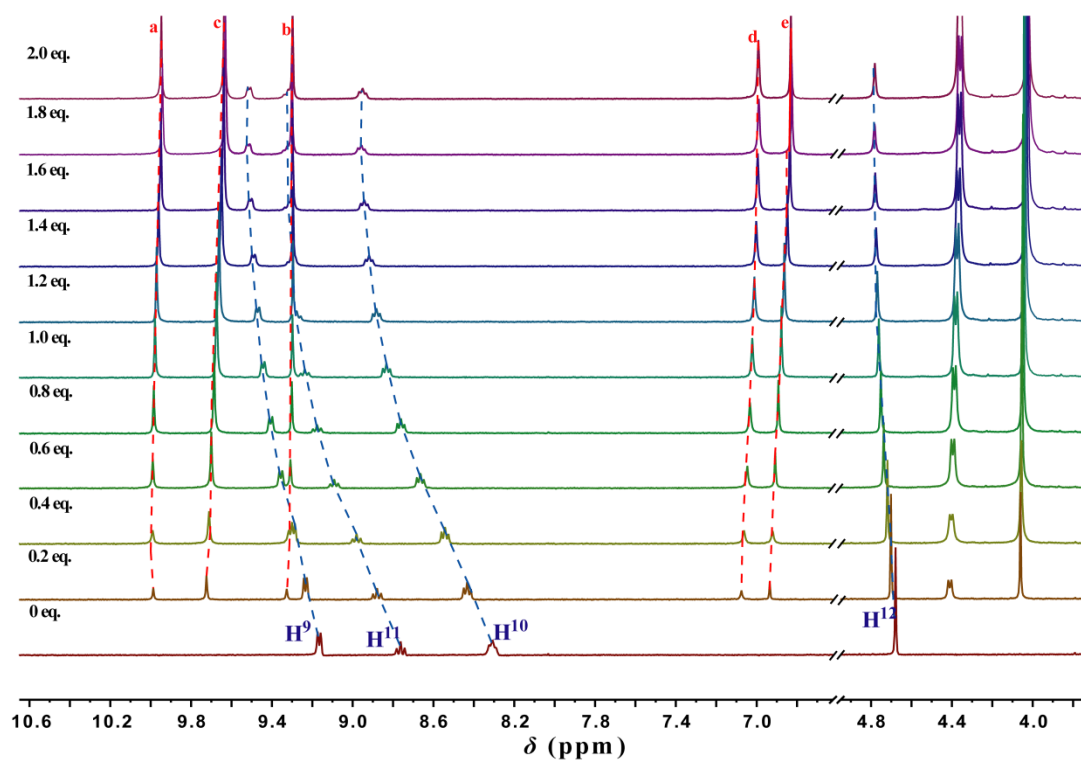

**Figure S51** Stacked plots of  $^1\text{H}$  NMR spectra of **G3** (1 mM) titrated with **1** (0-2.0 mM) in acetone- $\text{d}_6$  (400 MHz, 298 K).

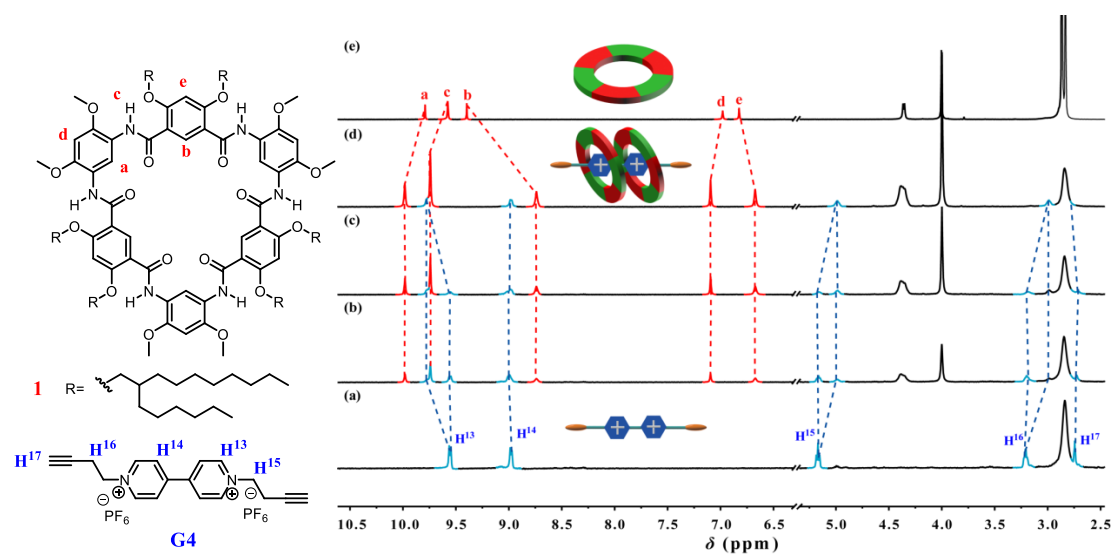

**Figure S52** Partial  $^1\text{H}$  NMR spectra (400 MHz, acetone- $\text{d}_6$ , 298 K) of (a) 1.0 mM **G4**, (b) 0.5 mM **1** and 1.0 mM **G4**, (c) 1.0 mM **1** and 1.0 mM **G4**, (d) 2.0 mM **1** and 1.0 mM **G4**, (e) 1.0 mM **1**.

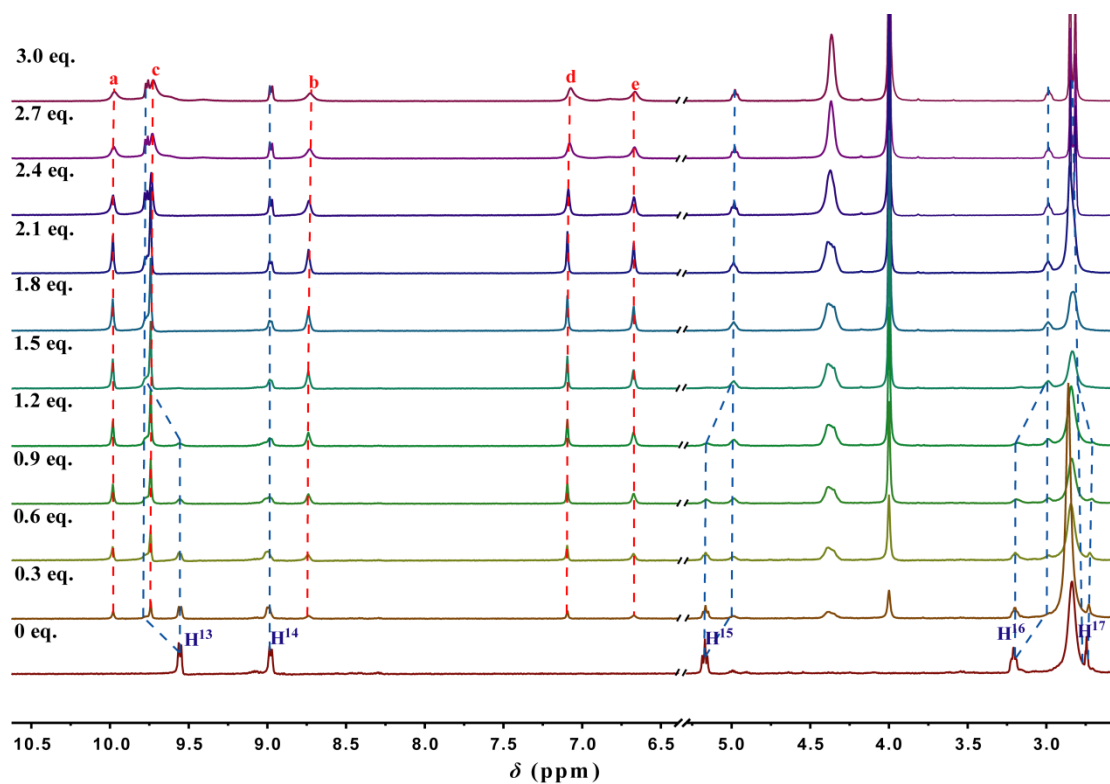

**Figure S53** Stacked plots of  $^1\text{H}$  NMR spectra of **G4** (1 mM) titrated with **1** (0-3.0 mM) in acetone- $\text{d}_6$  (400 MHz, 298 K).

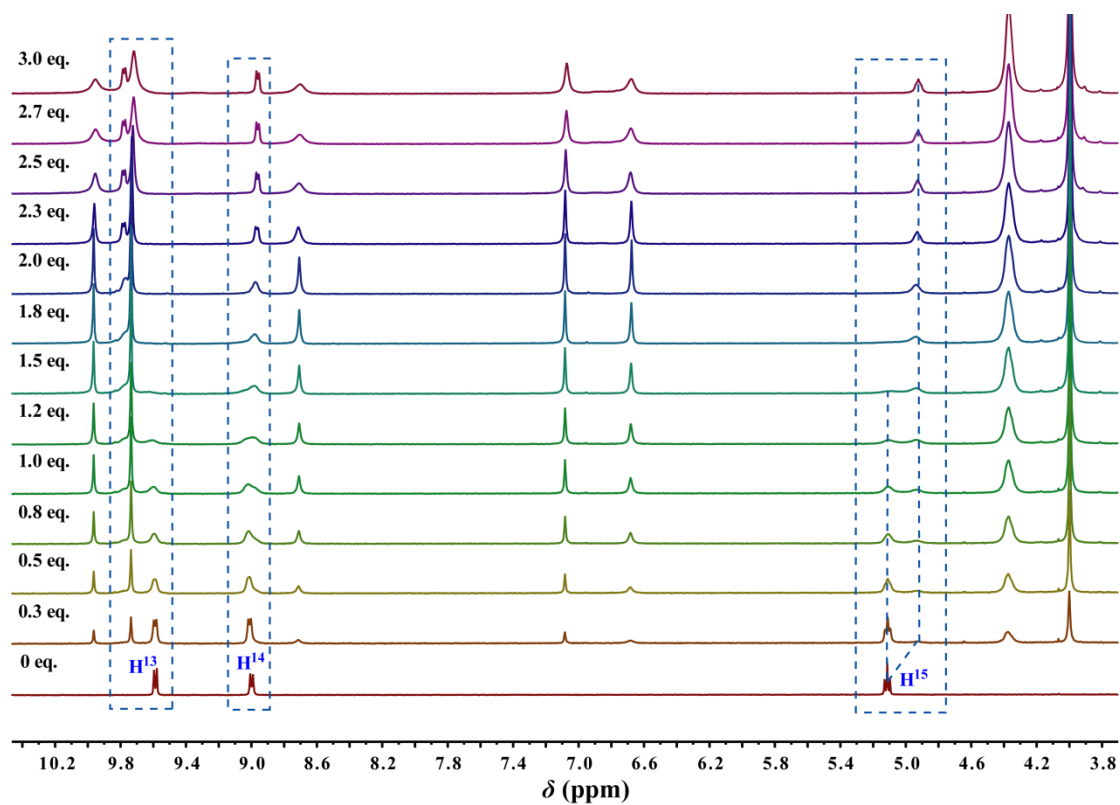

**Figure S54** Stacked plots of  $^1\text{H}$  NMR spectra of **G4** (1 mM) titrated with **1** (0-3.0 mM) in acetone- $\text{d}_6$ /DMSO- $\text{d}_6$  (9/1, v/v) (400 MHz, 298 K).

## 4.2 2D NMR Spectra of Host-Guest Complexes

### 4.2.1 2D-NOESY Spectra of Host-Guest Complexes

NOESY NMR spectroscopic studies were carried out in an effort to elucidate the nature of the host-guest interactions between cyclo[6]aramide **1** and pyridinium guests **G1-G4** in  $\text{CD}_3\text{COCD}_3$  solution. In the resulting spectra of  $\mathbf{1}_2 \supset \mathbf{G1}$ , correlations between ( $\text{H}^a, \text{H}^b$ ) and  $\text{H}^2$ , ( $\text{H}^a, \text{H}^b$ ) and  $\text{H}^3$  were observed. In the resulting spectra of  $\mathbf{1} \supset \mathbf{G4}$ , correlations between  $\text{H}^a$  and ( $\text{H}^{13}, \text{H}^{14}, \text{H}^{15}$ ),  $\text{H}^b$  and ( $\text{H}^{13}, \text{H}^{14}, \text{H}^{15}$ ), were observed. These spectra are consistent with the guests complexed in the cavities of cyclo[6]aramides and the threaded binding mode shown in **Scheme 1** of the main text. Also, in the resulting spectra of  $\mathbf{1}_2 \supset \mathbf{G2}$ , correlations between  $\text{H}^a$  and ( $\text{H}^5, \text{H}^6, \text{H}^7, \text{H}^8$ ),  $\text{H}^b$  and ( $\text{H}^6, \text{H}^8$ ) were observed. In the resulting spectra of  $\mathbf{1} \supset \mathbf{G3}$ , correlations between  $\text{H}^a$  and ( $\text{H}^9, \text{H}^{10}, \text{H}^{12}$ ),  $\text{H}^b$  and  $\text{H}^{12}$  were observed.

#### 2D-NOESY Spectra of $\mathbf{1}_2 \supset \mathbf{G1}$

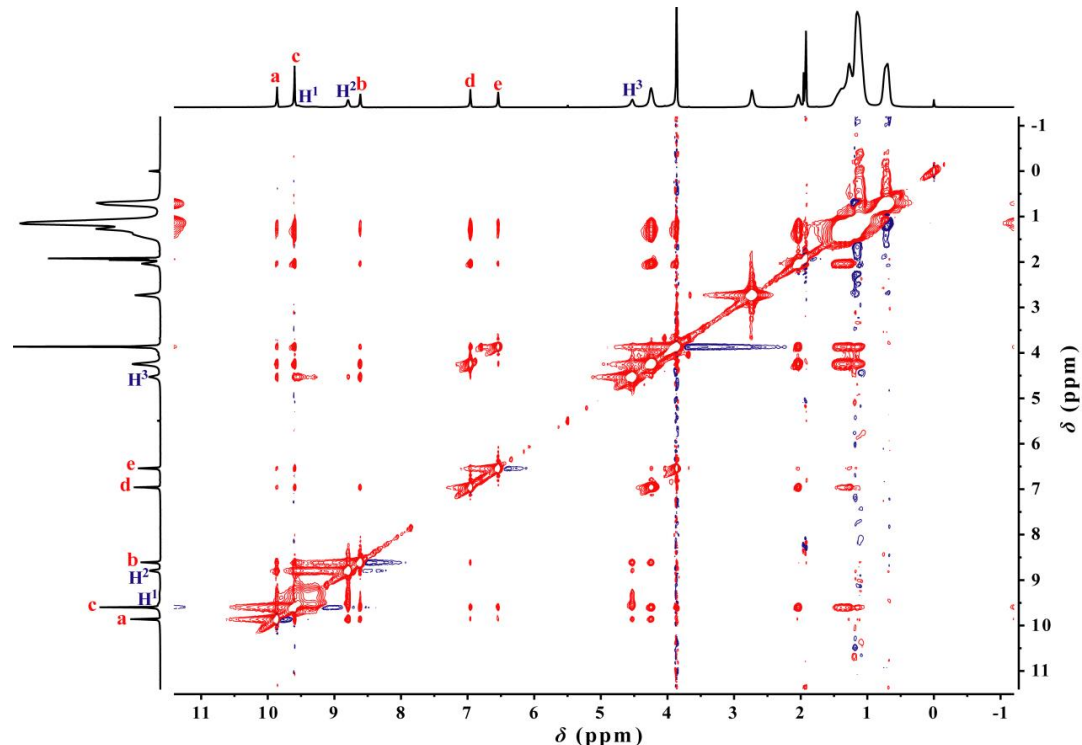

**Figure S55** 2D-NOESY spectra of  $\mathbf{1}_2 \supset \mathbf{G1}$  ( $[\mathbf{1}] = 10 \text{ mM}$ ,  $[\mathbf{G1}] = 5 \text{ mM}$ ,  $\mathbf{1} : \mathbf{G1} = 2 : 1$ ) ( $\text{CD}_3\text{COCD}_3$ , 400 MHz, 298 K, mixing time = 0.4 s).

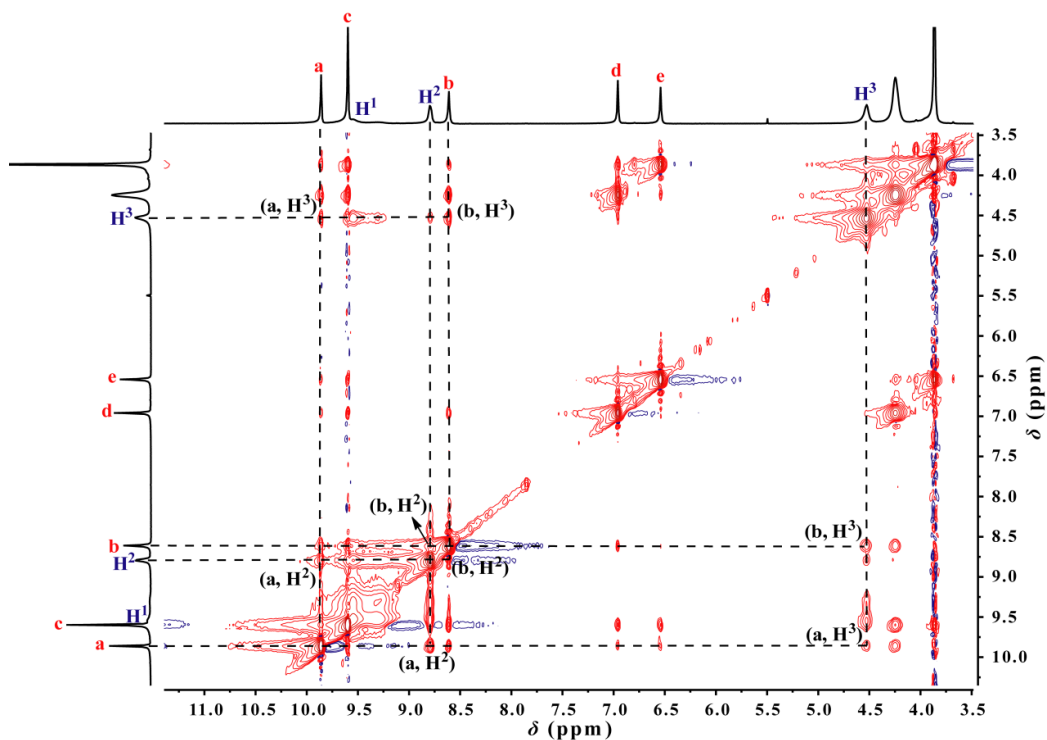

**Figure S56** Expanded 2D-NOESY spectra of  $\mathbf{1}_2 \supset \mathbf{G1}$  ( $[\mathbf{1}] = 10 \text{ mM}$ ,  $[\mathbf{G1}] = 5 \text{ mM}$ ,  $\mathbf{1} : \mathbf{G1} = 2 : 1$ ) ( $\text{CD}_3\text{COCD}_3$ , 400 MHz, 298 K, mixing time = 0.4 s).

### 2D-NOESY Spectra of $\mathbf{1}_2 \supset \mathbf{G2}$

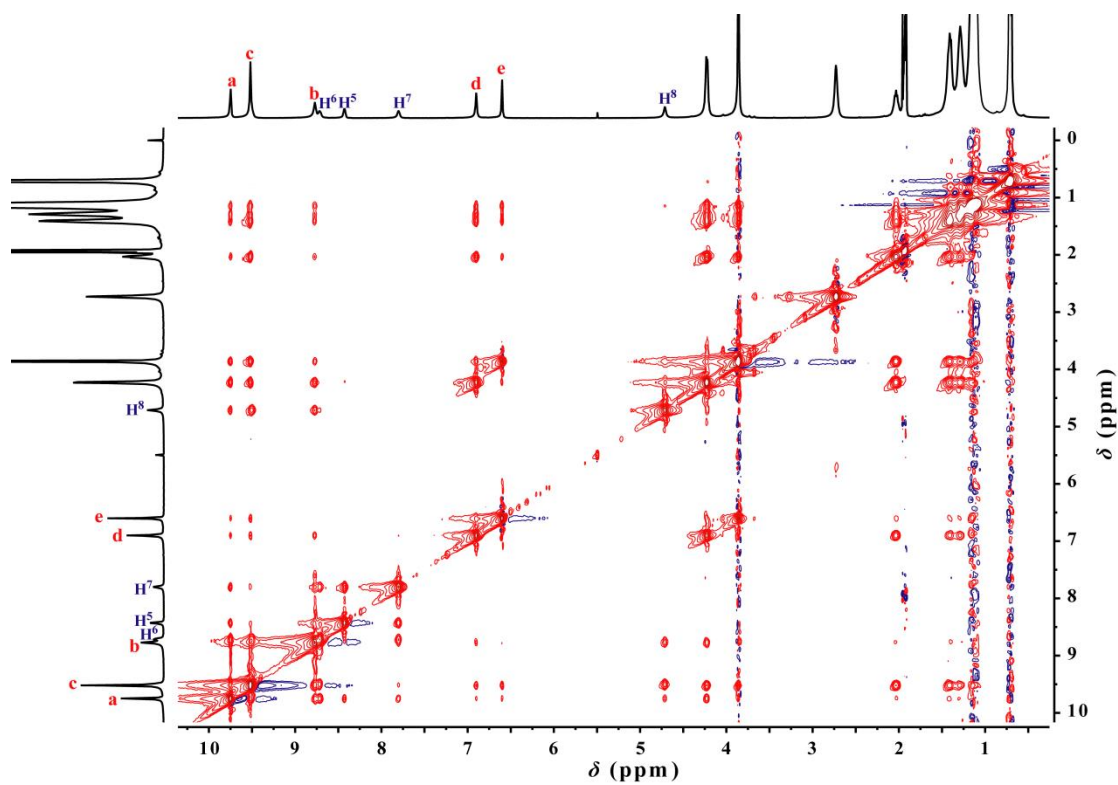

**Figure S57** 2D-NOESY spectra of  $\mathbf{1}_2 \supset \mathbf{G2}$  ( $[\mathbf{1}] = 10 \text{ mM}$ ,  $[\mathbf{G2}] = 5 \text{ mM}$ ,  $\mathbf{1} : \mathbf{G2} = 2 : 1$ ) ( $\text{CD}_3\text{COCD}_3$ , 400 MHz, 298 K, mixing time = 0.4 s).

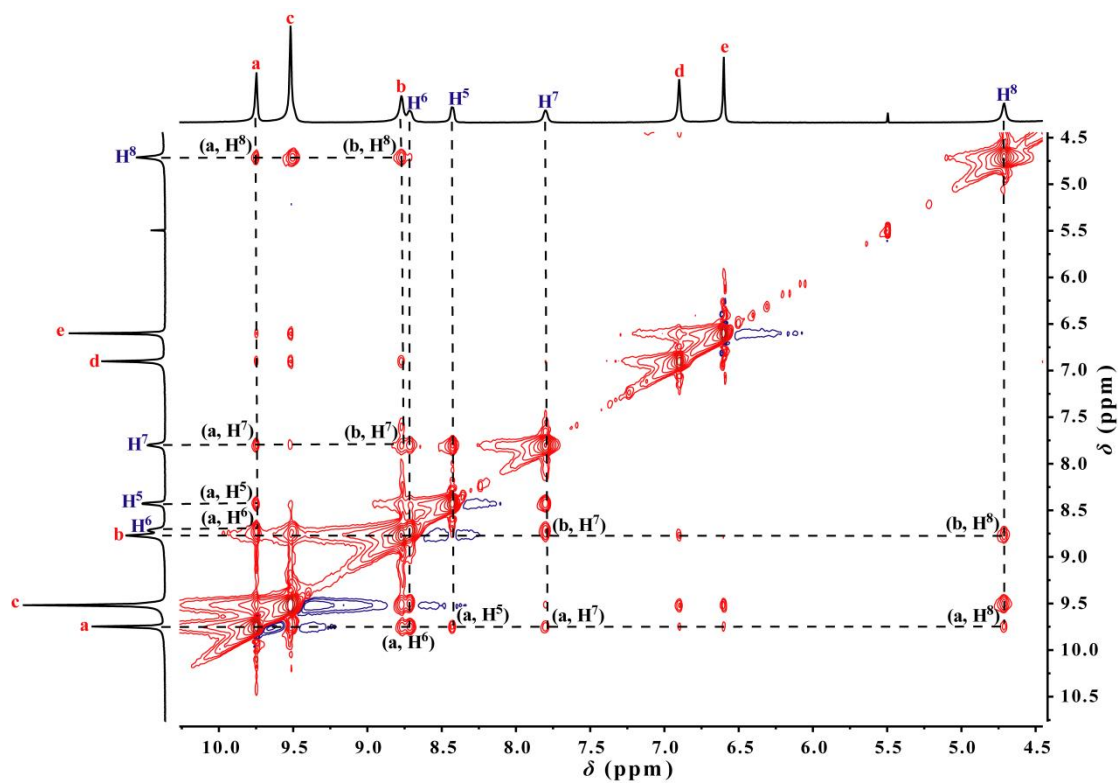

**Figure S58** Expanded 2D-NOESY spectra of  $1_2 \supset \text{G2}$  ( $[1] = 10 \text{ mM}$ ,  $[\text{G2}] = 5 \text{ mM}$ ,  $1 : \text{G2} = 2 : 1$ ) ( $\text{CD}_3\text{COCD}_3$ , 400 MHz, 298 K, mixing time = 0.4 s).

### 2D-NOESY Spectra of $1 \supset \text{G3}$

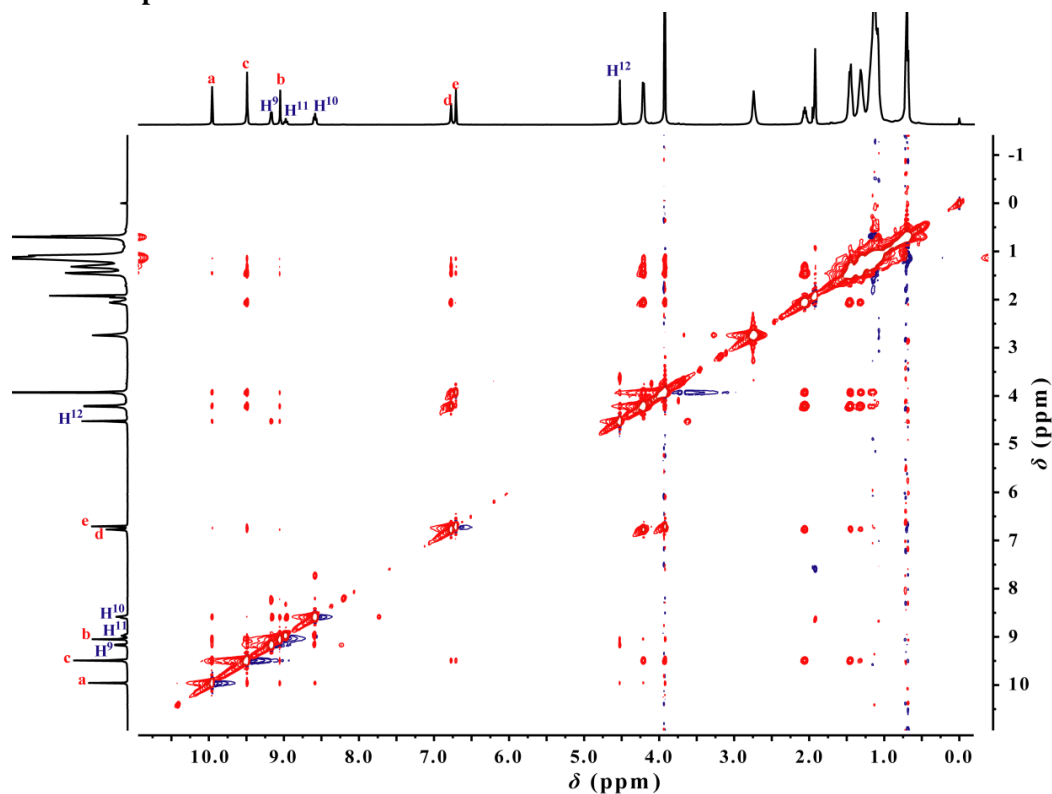

**Figure S59** 2D-NOESY spectra of  $1 \supset \text{G3}$  ( $[1] = 10 \text{ mM}$ ,  $[\text{G3}] = 5 \text{ mM}$ ,  $1 : \text{G3} = 2 : 1$ ) ( $\text{CD}_3\text{COCD}_3$ , 400 MHz, 298 K, mixing time = 0.4 s).

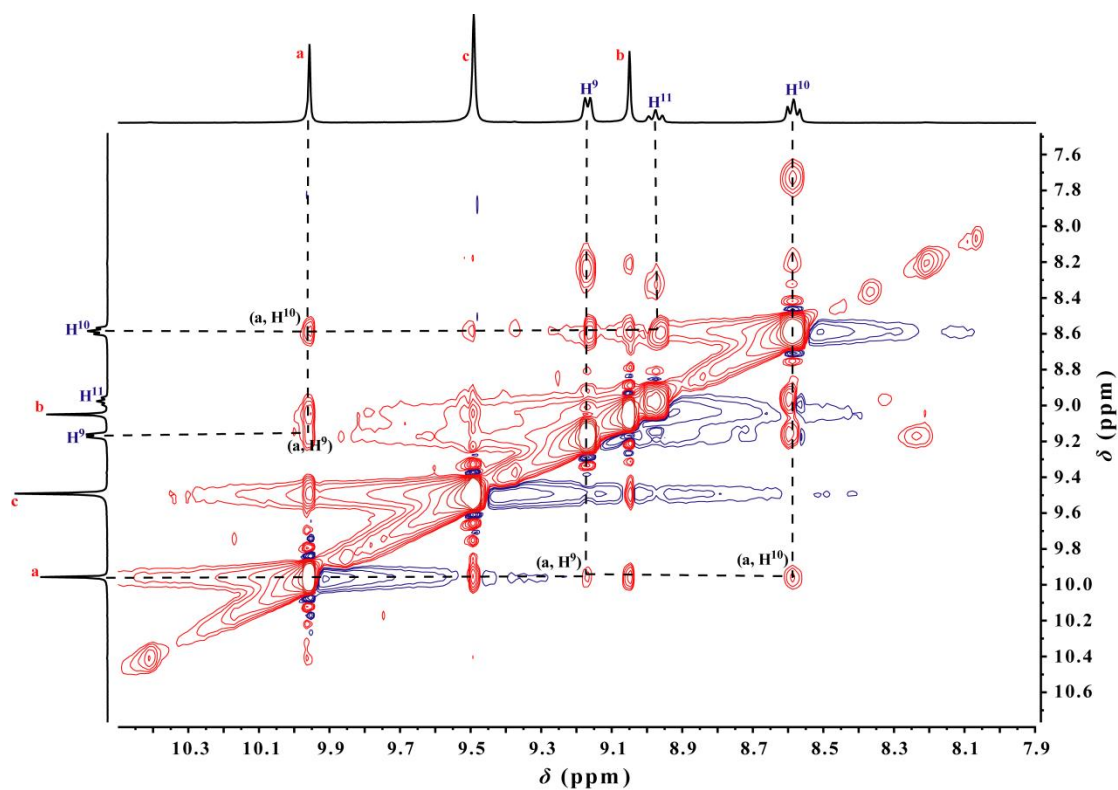

**Figure S60** Expanded 2D-NOESY spectra of **1**  $\supset$  **G3** (**[1]** = 10 mM, **[G3]** = 5 mM, **1** : **G3** = 2 : 1) ( $\text{CD}_3\text{COCD}_3$ , 400 MHz, 298 K, mixing time = 0.4 s).

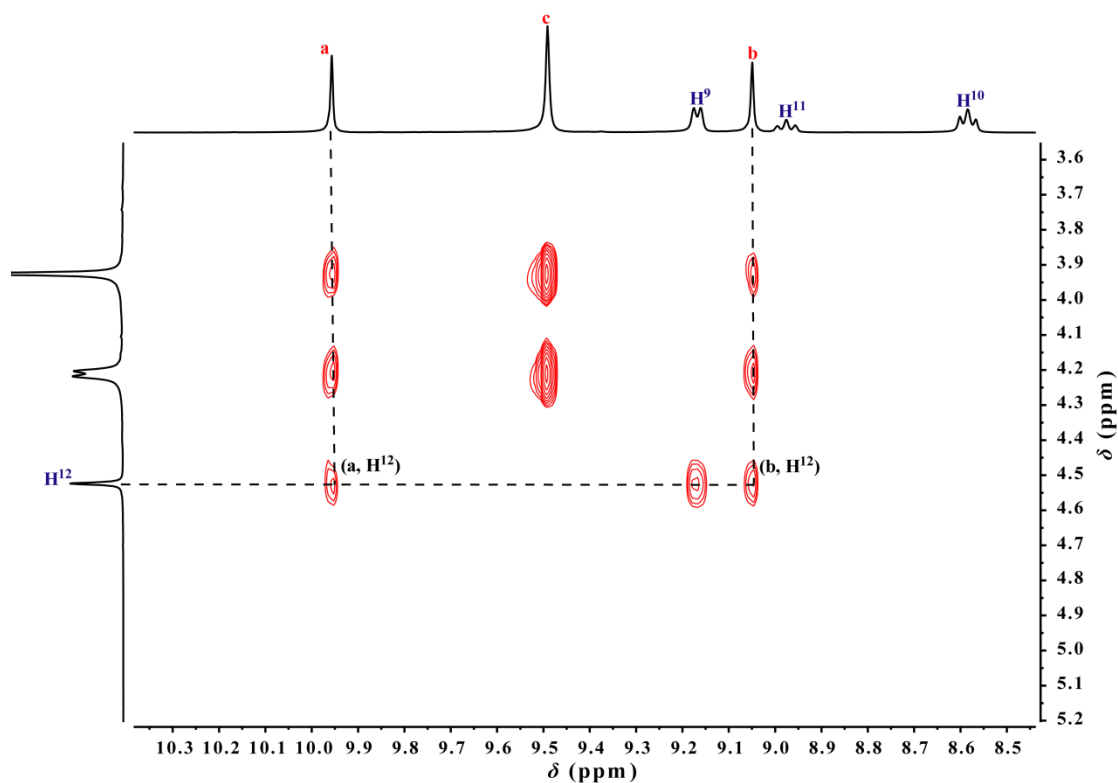

**Figure S61** Expanded 2D-NOESY spectra of **1**  $\supset$  **G3** (**[1]** = 10 mM, **[G3]** = 5 mM, **1** : **G3** = 2 : 1) ( $\text{CD}_3\text{COCD}_3$ , 400 MHz, 298 K, mixing time = 0.4 s).



## 2D-NOESY Spectra of $\mathbf{1}_2 \supset \mathbf{G4}$

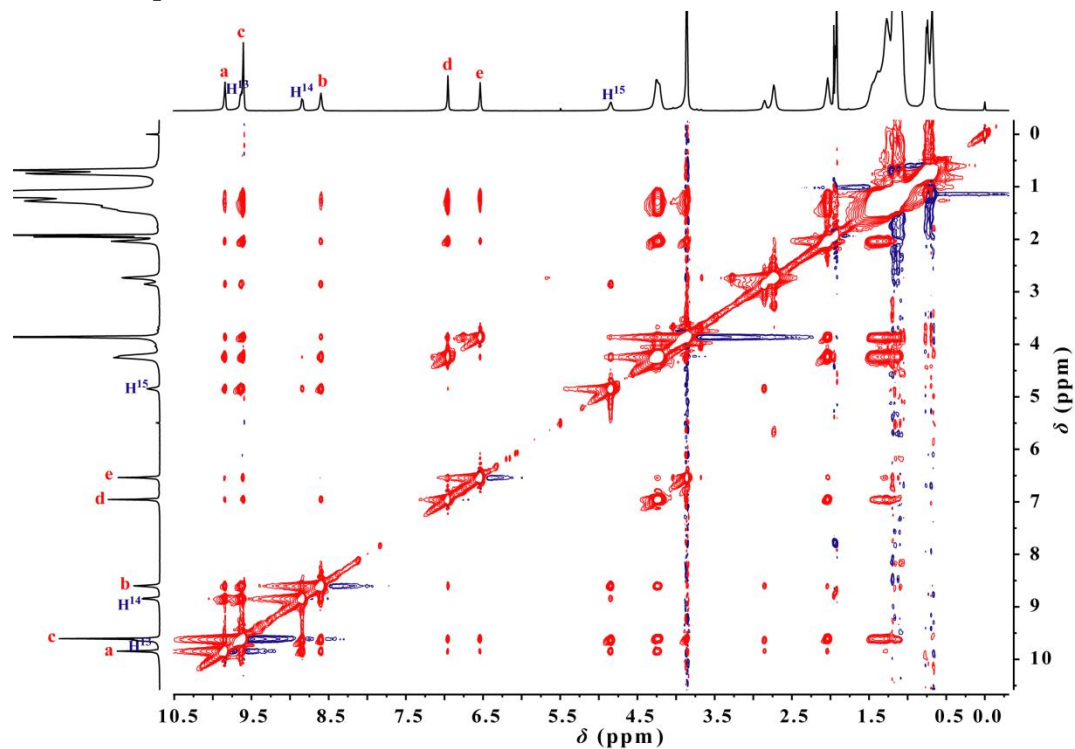

**Figure S62** 2D-NOESY spectra of  $\mathbf{1}_2 \supset \mathbf{G4}$  ( $[\mathbf{1}] = 10 \text{ mM}$ ,  $[\mathbf{G4}] = 5 \text{ mM}$ ,  $\mathbf{1} : \mathbf{G4} = 2 : 1$ ) ( $\text{CD}_3\text{COCD}_3$ , 400 MHz, 298 K, mixing time = 0.4 s).

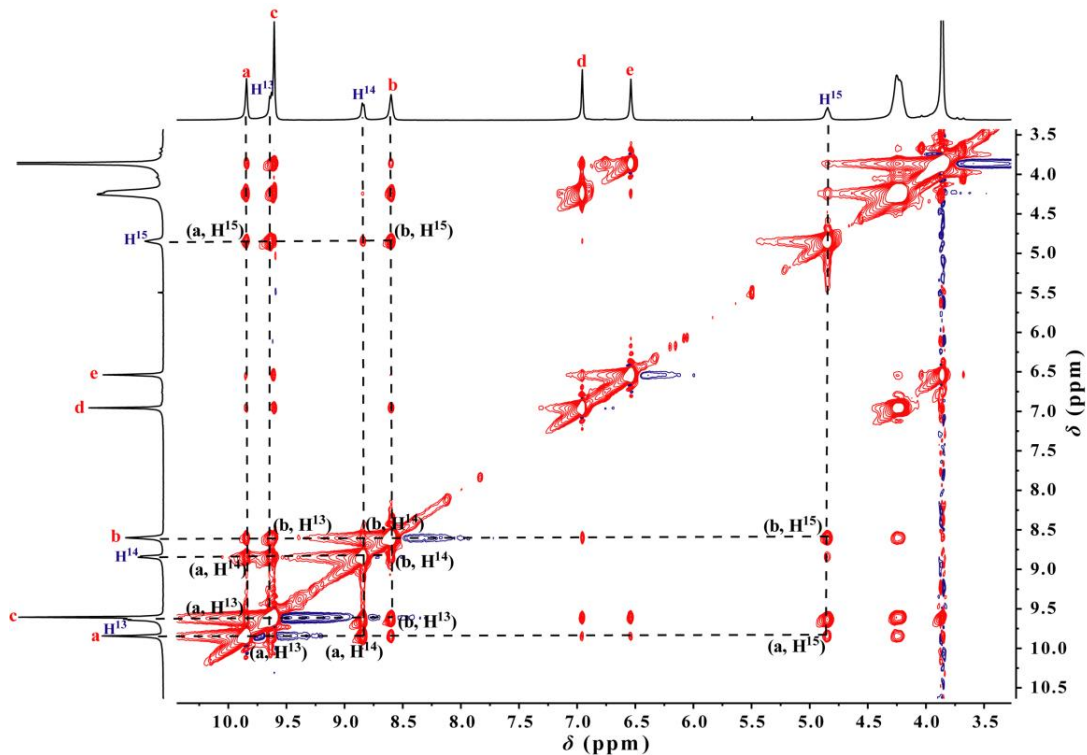

**Figure S63** Expanded 2D-NOESY spectra of  $\mathbf{1}_2 \supset \mathbf{G4}$  ( $[\mathbf{1}] = 10 \text{ mM}$ ,  $[\mathbf{G4}] = 5 \text{ mM}$ ,  $\mathbf{1} : \mathbf{G4} = 2 : 1$ ) ( $\text{CD}_3\text{COCD}_3$ , 400 MHz, 298 K, mixing time = 0.4 s).

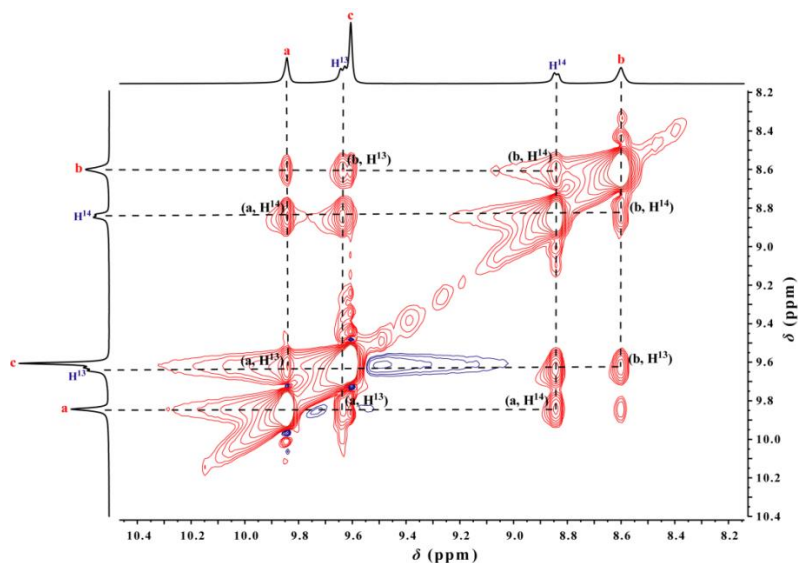

**Figure S64** Expanded 2D-NOESY spectra of  $\mathbf{1}_2 \supset \mathbf{G4}$  ( $[\mathbf{1}] = 10 \text{ mM}$ ,  $[\mathbf{G4}] = 5 \text{ mM}$ ,  $\mathbf{1} : \mathbf{G4} = 2 : 1$ ) ( $\text{CD}_3\text{COCD}_3$ , 400 MHz, 298 K, mixing time = 0.4 s).

#### 4.2.2 2D-DOSY Spectra of Host-Guest Complexes

2D-DOSY spectroscopic analyses provided evidence that a stable complex was formed between host cyclo[6]aramide  $\mathbf{1}$  and pyridinium guests  $\mathbf{G1-G4}$ . For the complexes  $\mathbf{1}_2 \supset \mathbf{G1}$ ,  $\mathbf{1}_2 \supset \mathbf{G2}$  and  $\mathbf{1}_2 \supset \mathbf{G4}$ , all of the protons except the solvent, including those located on  $\mathbf{1}$  and guests ( $\mathbf{G1}$ ,  $\mathbf{G2}$  and  $\mathbf{G4}$ ), showed the same diffusion constants in the representative solution state mixtures. For the complex of  $\mathbf{1} \supset \mathbf{G3}$ , all of the protons, including those located on  $\mathbf{1}$  and  $\mathbf{G3}$  showed the very similar diffusion constants in the representative solution state mixtures.

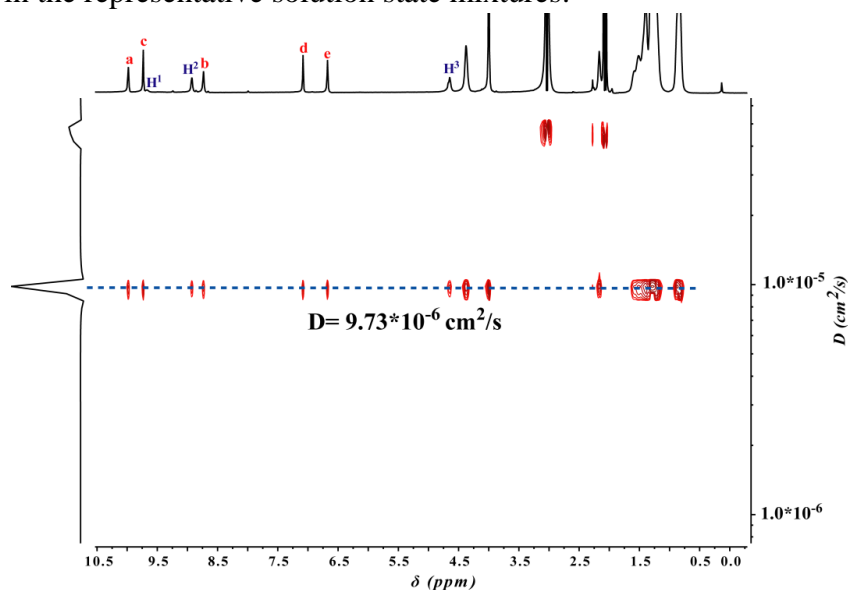

**Figure S65** Expanded view of the 600 MHz 2D-DOSY NMR spectrum of  $\mathbf{1}$  (10.0 mM) recorded in the presence of 1 molar equiv. of  $\mathbf{G1}$  (5.0 mM) in  $\text{CD}_3\text{COCD}_3$  at 298 K.

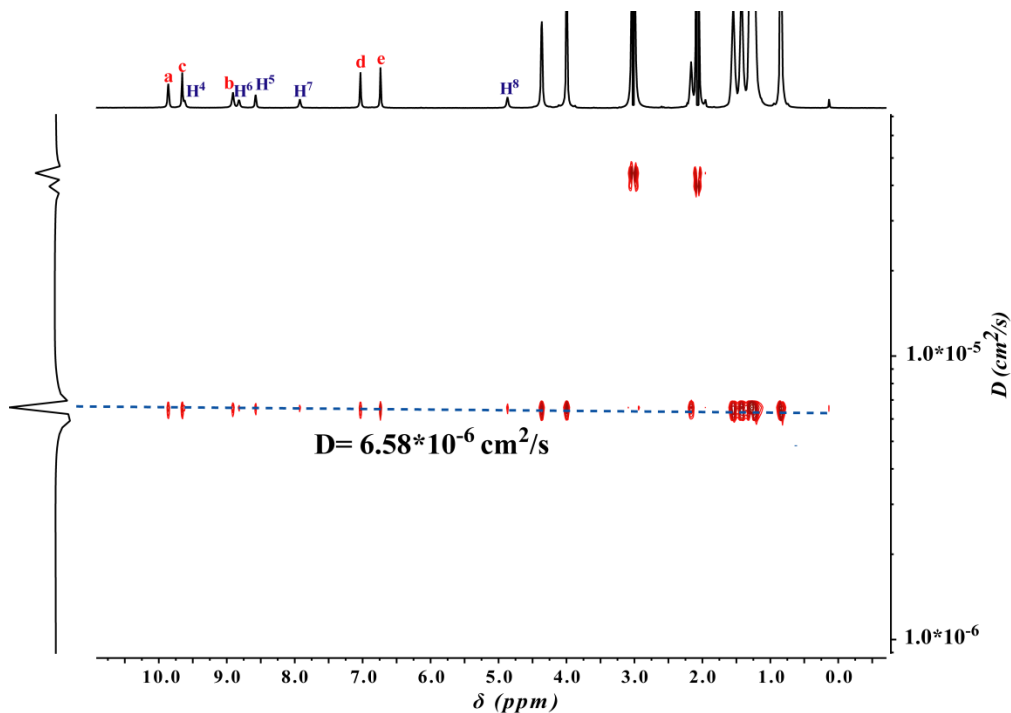

**Figure S66** Expanded view of the 600 MHz 2D-DOSY NMR spectrum of **1** (10.0 mM) recorded in the presence of 1 molar equiv. of **G2** (5.0 mM) in CD<sub>3</sub>COCD<sub>3</sub> at 298 K.

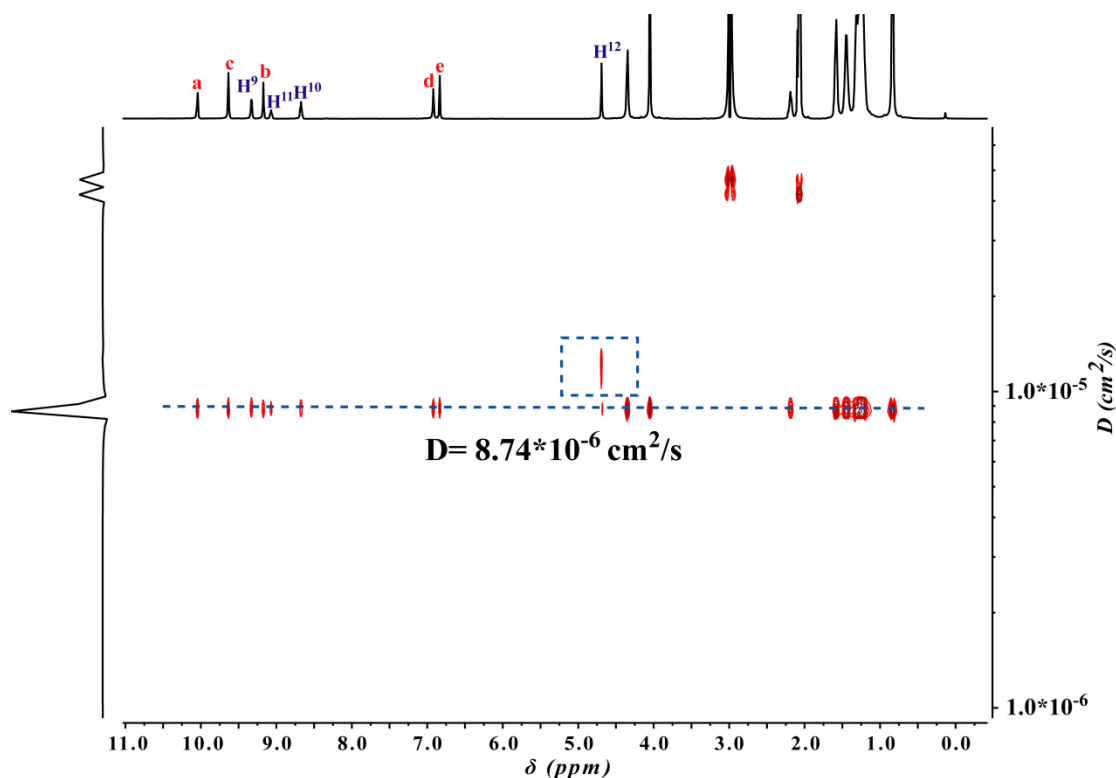

**Figure S67** Expanded view of the 600 MHz 2D-DOSY NMR spectrum of **1** (10.0 mM) recorded in the presence of 1 molar equiv. of **G3** (10.0 mM) in CD<sub>3</sub>COCD<sub>3</sub> at 298 K.

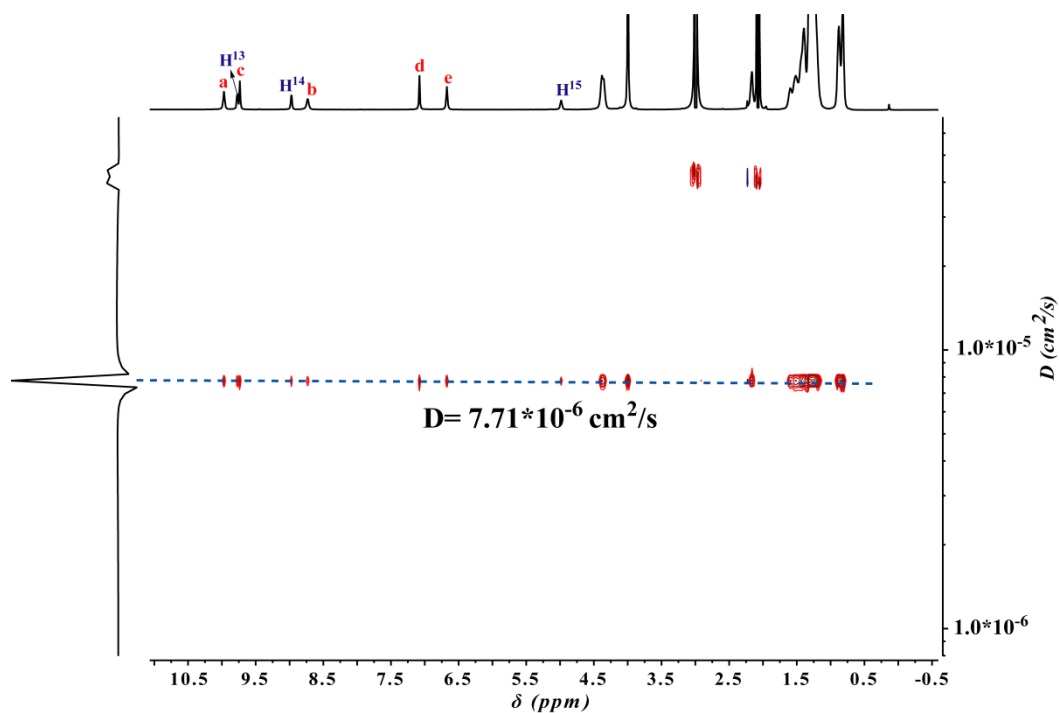

**Figure S68** Expanded view of the 600 MHz 2D-DOSY NMR spectrum of **1** (10.0 mM) recorded in the presence of 1 molar equiv. of **G4** (5.0 mM) in  $\text{CD}_3\text{COCD}_3$  at 298 K.

### 4.3 UV-vis Spectra of $\mathbf{1}_2 \supset \mathbf{G1}$ and $\mathbf{1}_2 \supset \mathbf{G4}$

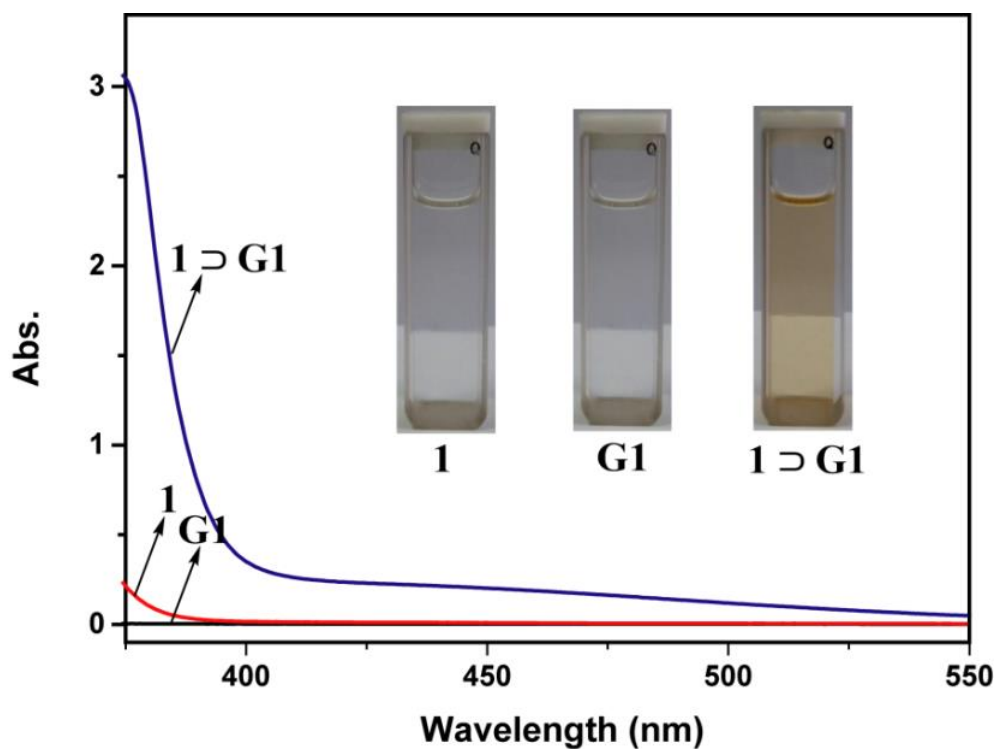

**Figure S69** UV-vis spectra of **1**, **G1** and  $\mathbf{1}_2 \supset \mathbf{G1}$  (1 mM for each) in acetone. Inserted images show the color change.

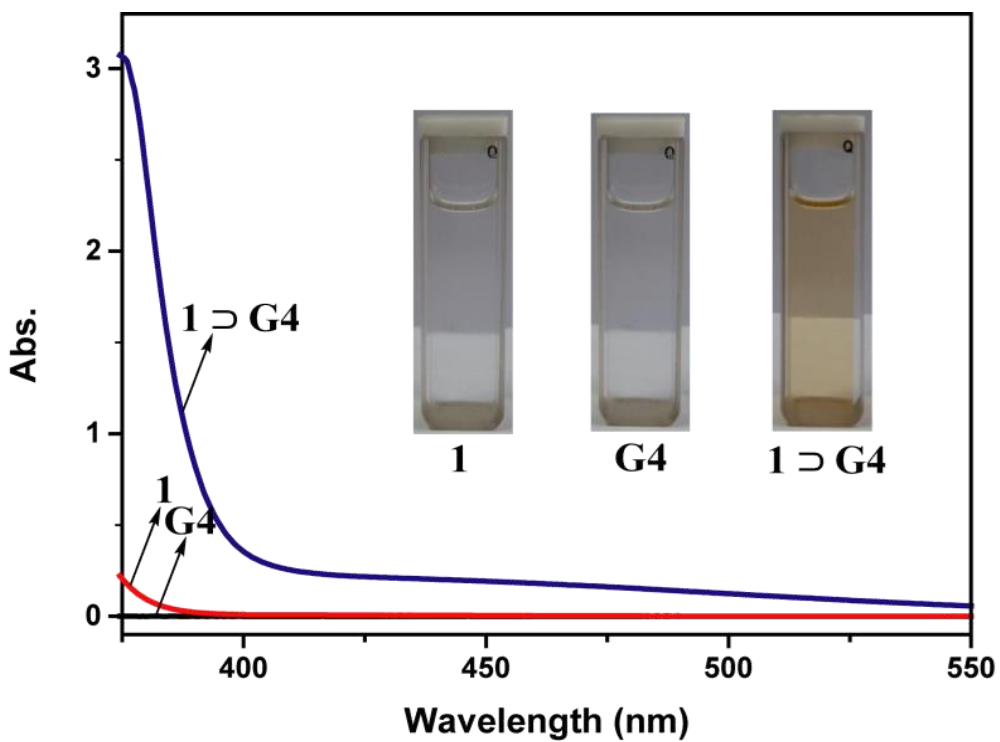

**Figure S70** UV-vis spectra of **1**, **G4** and **1<sub>2</sub> ⊃ G4** (1 mM for each) in acetone. Inserted images show the color change.

#### 4.4 Job Plots of Host-Guest Complexes

##### Job plots of **1<sub>2</sub> ⊃ G1**

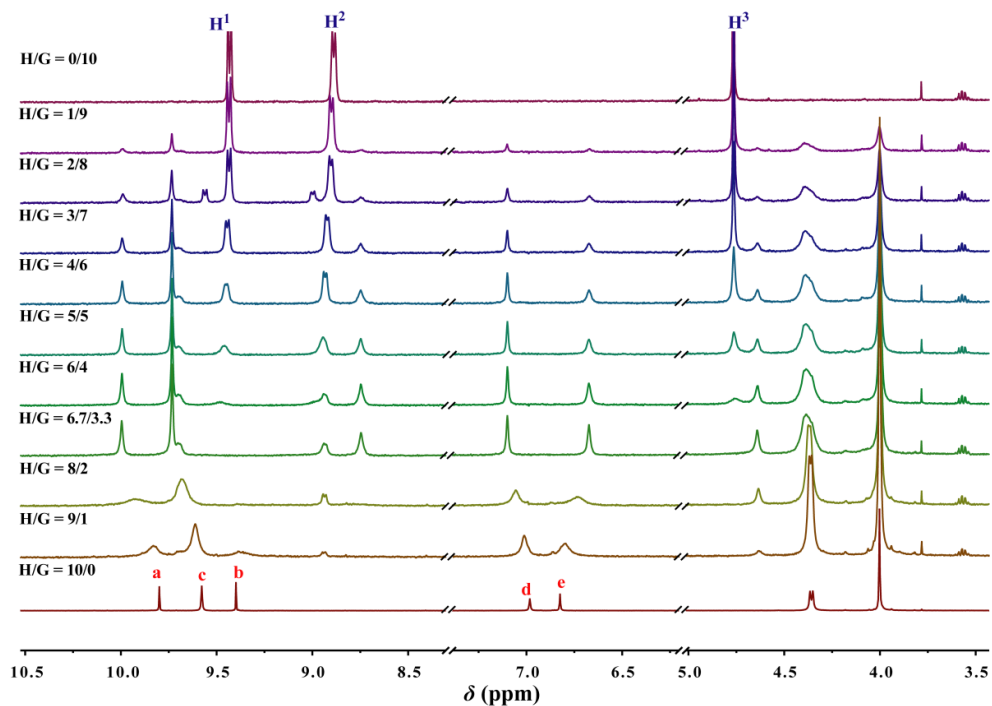

**Figure S71** Partial stacked <sup>1</sup>H NMR spectra (400 MHz, 298 K, CD<sub>3</sub>COCD<sub>3</sub>) of **1<sub>2</sub> ⊃ G1** in the presence of the different ratio of **1** and **G1** at a fixed total concentration 1.0 mM.

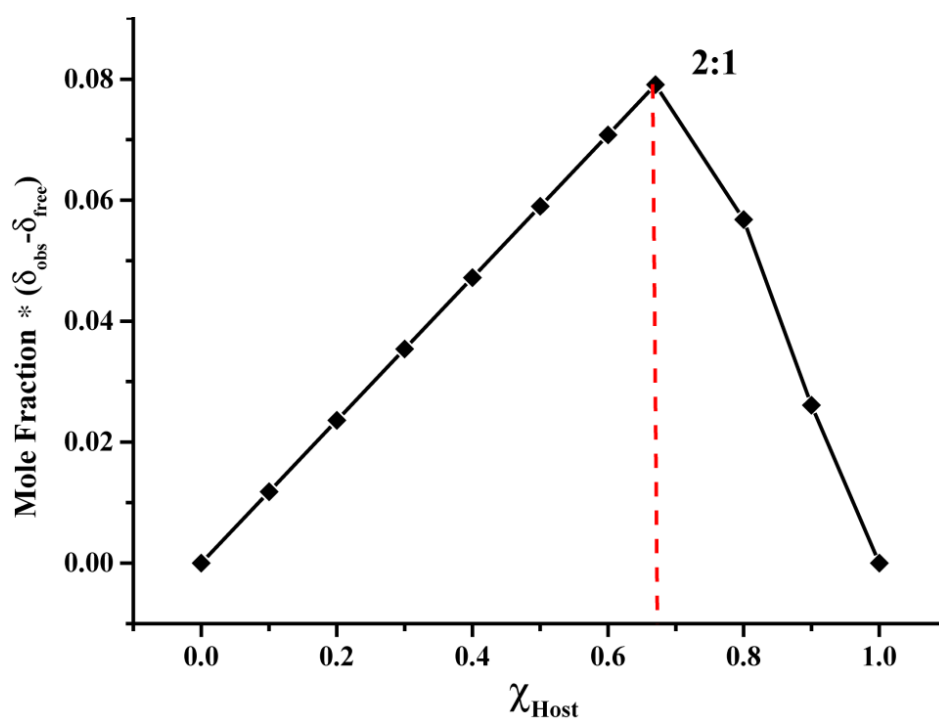

**Figure S72** Job plots between  $\mathbf{1}_2 \supset \mathbf{G1}$  were obtained by plotting the chemical shift changes of the proton **a** (low-field signal) on cyclo[6]aramide **1** indicating a 2:1 stoichiometry.

### Job plots of $\mathbf{1}_2 \supset \mathbf{G2}$

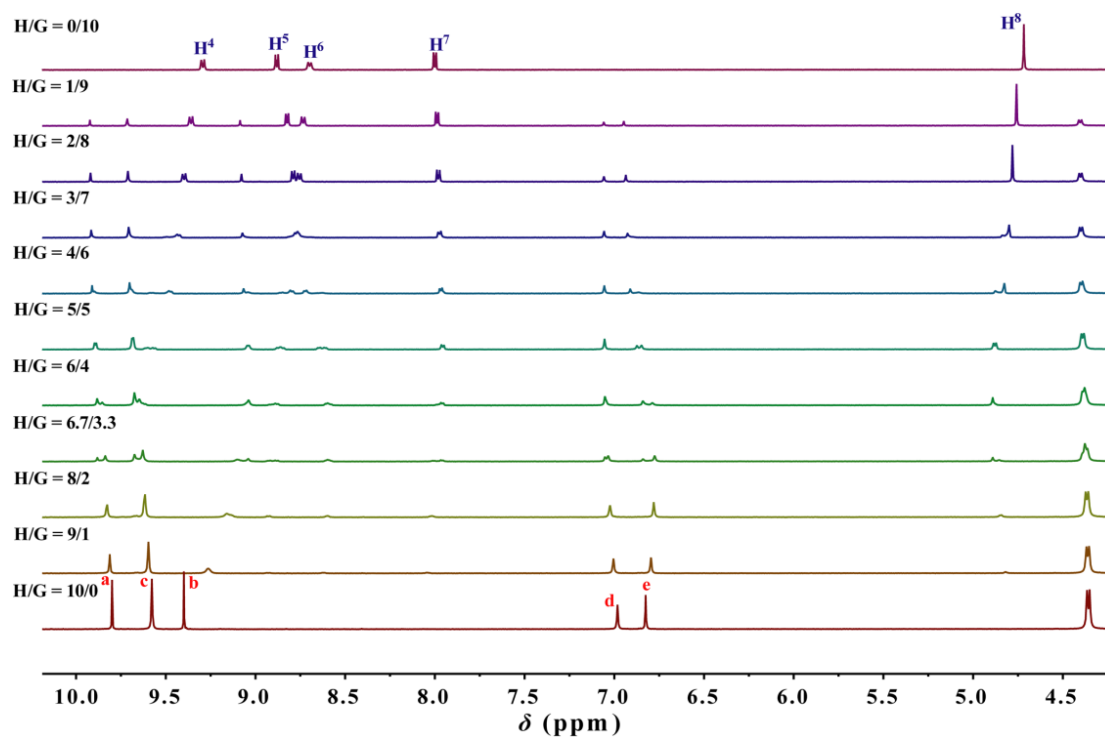

**Figure S73** Partial stacked  $^1\text{H}$  NMR spectra (400 MHz, 298 K,  $\text{CD}_3\text{COCD}_3$ ) of  $\mathbf{1}_2 \supset \mathbf{G2}$  in the presence of the different ratio of **1** and **G2** at a fixed total concentration 1.0 mM.

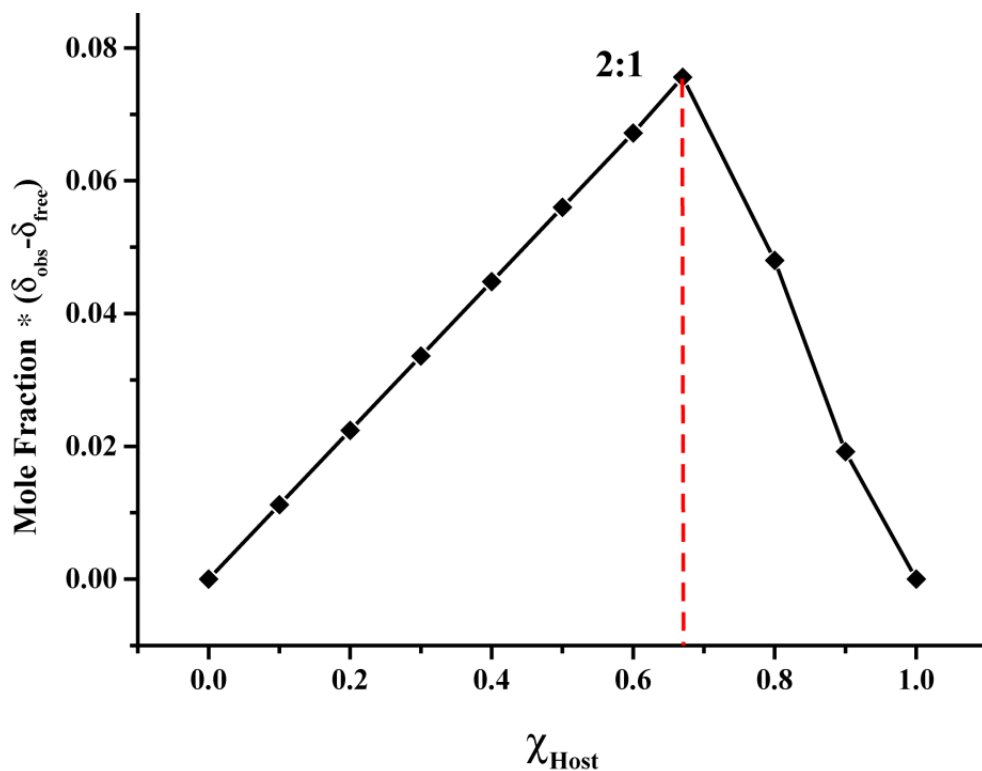

**Figure S74** Job plots between **1**  $\supset$  **G2** were obtained by plotting the chemical shift changes of the proton **d** (low-field signal) on cyclo[6]aramide **1** indicating a 2:1 stoichiometry.

### Job plots of **1** $\supset$ **G3**

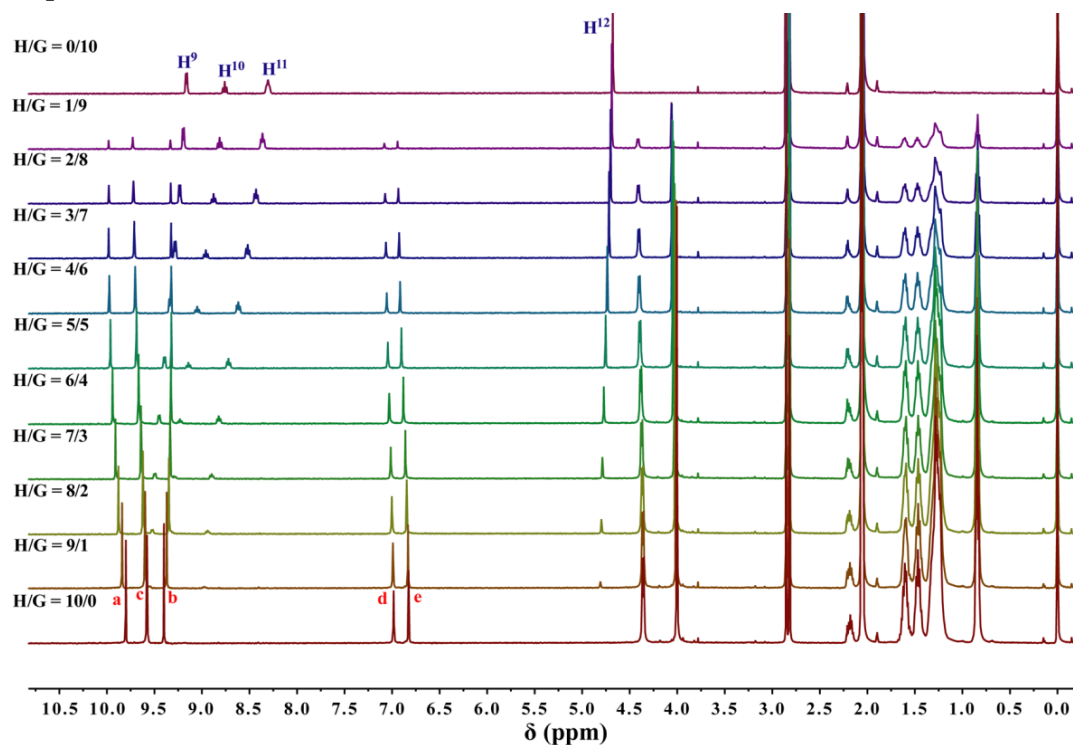

**Figure S75** Partial stacked  $^1\text{H}$  NMR spectra (400 MHz, 298 K,  $\text{CD}_3\text{COCD}_3$ ) of **1**  $\supset$  **G3** in the presence of the different ratio of **1** and **G3** at a fixed total concentration 1.0 mM.

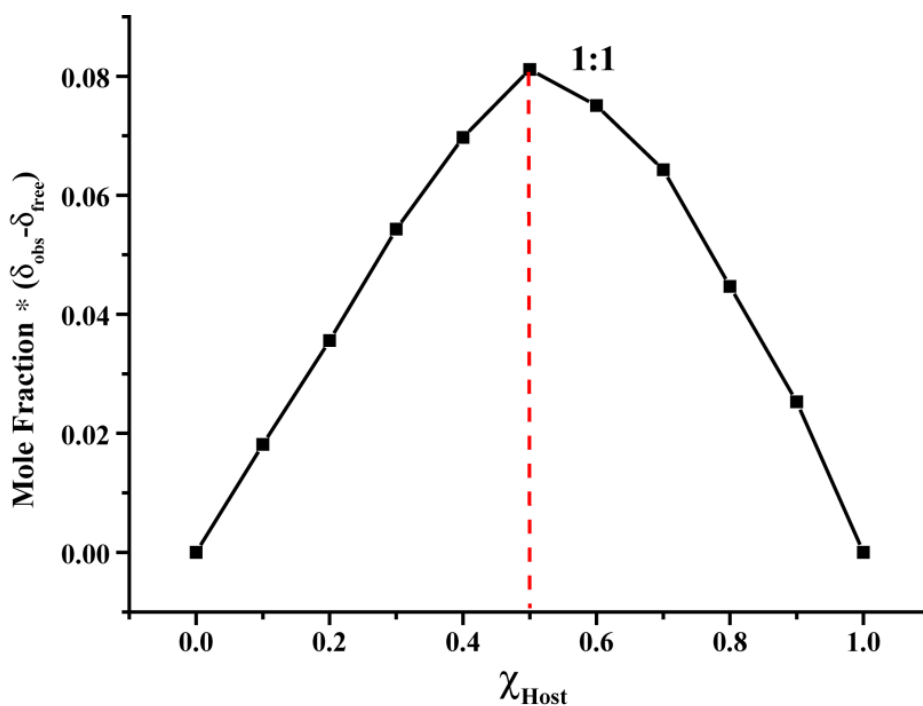

**Figure S76** Job plots between **1**  $\supset$  **G3** were obtained by plotting the chemical shift changes of the proton **a** on cyclo[6]aramide **1** indicating a 1:1 stoichiometry.

#### Job plots of **1**<sub>2</sub> $\supset$ **G4**

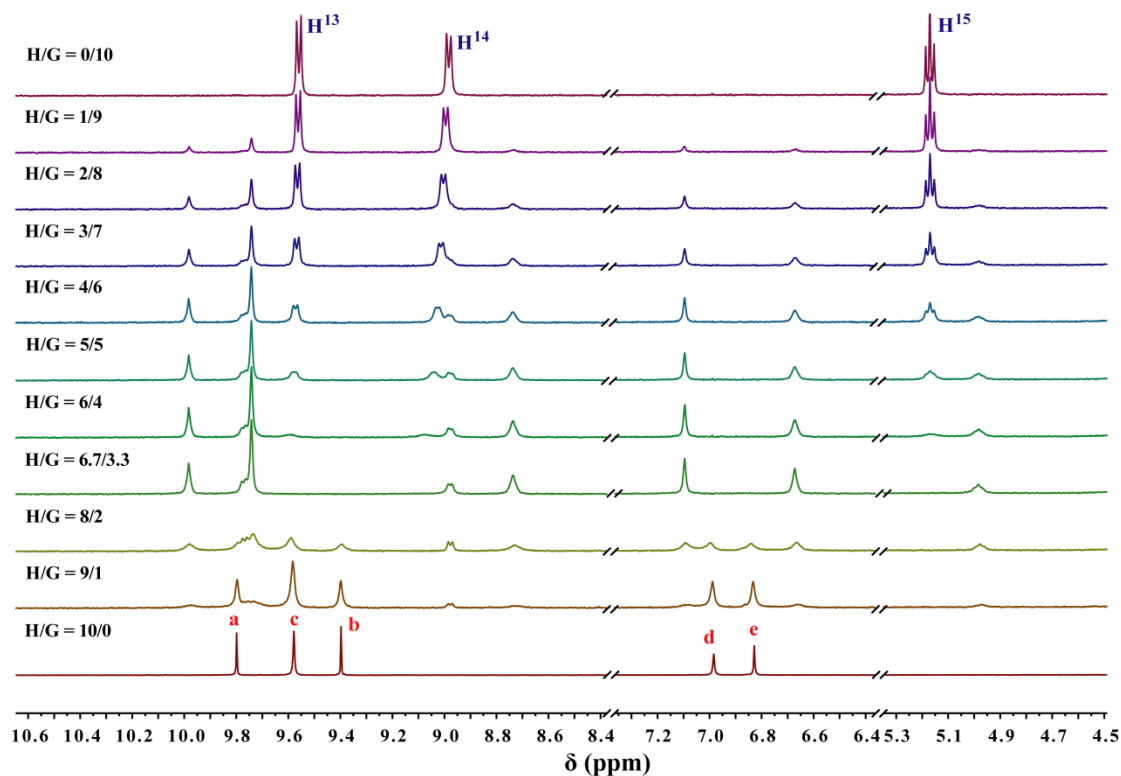

**Figure S77** Partial stacked <sup>1</sup>H NMR spectra (400 MHz, 298 K, CD<sub>3</sub>COCD<sub>3</sub>) of **1**<sub>2</sub>  $\supset$  **G4** in the presence of the different ratio of **1** and **G4** at a fixed total concentration 1.0 mM.



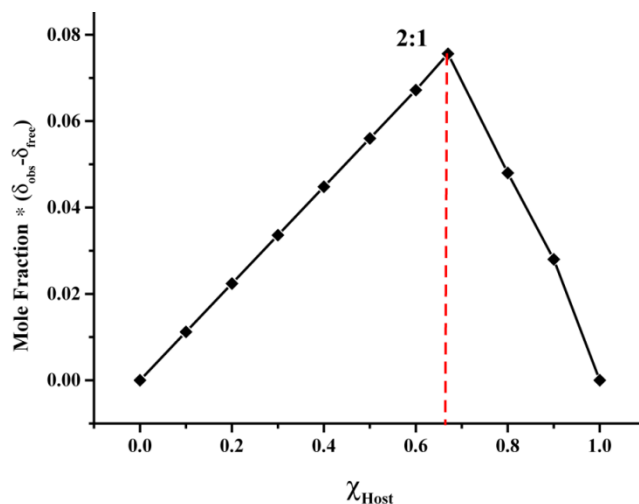

**Figure S78** Job plots between  $1_2 \supset G4$  were obtained by plotting the chemical shift changes of the proton **d** on cyclo[6]aramide **1** indicating a 2:1 stoichiometry.

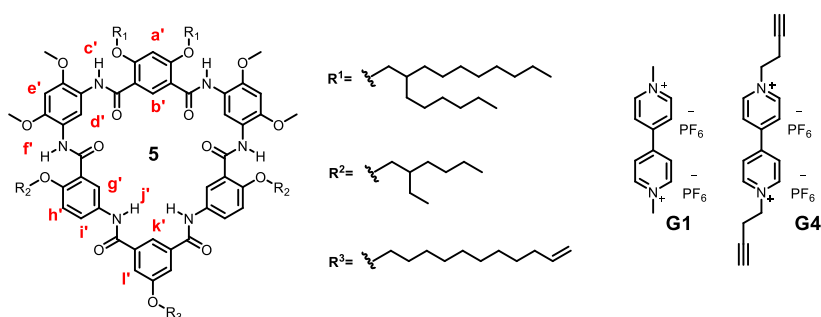

### Job plots of $5_2 \supset G1$

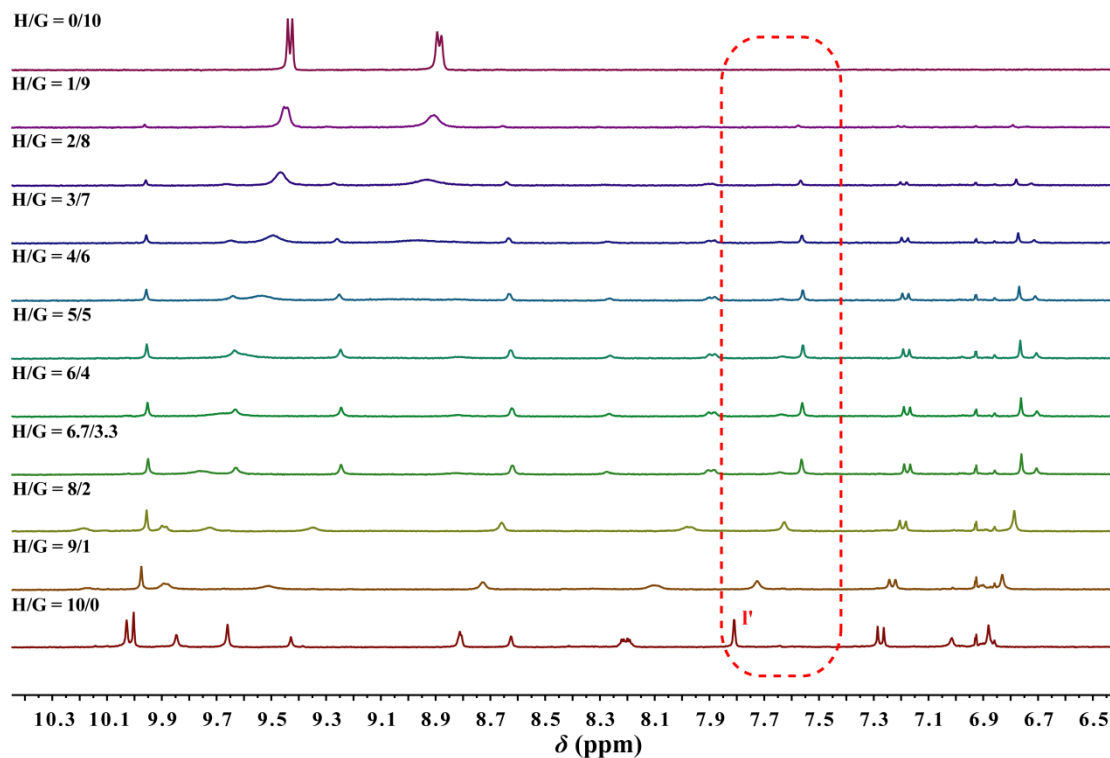

**Figure S79** Partial stacked  $^1\text{H}$  NMR spectra (400 MHz, 298 K,  $\text{CD}_3\text{COCD}_3$ ) of  $5_2 \supset G1$  in the

presence of the different ratio of **5** and **G1** at a fixed total concentration 1.0 mM.

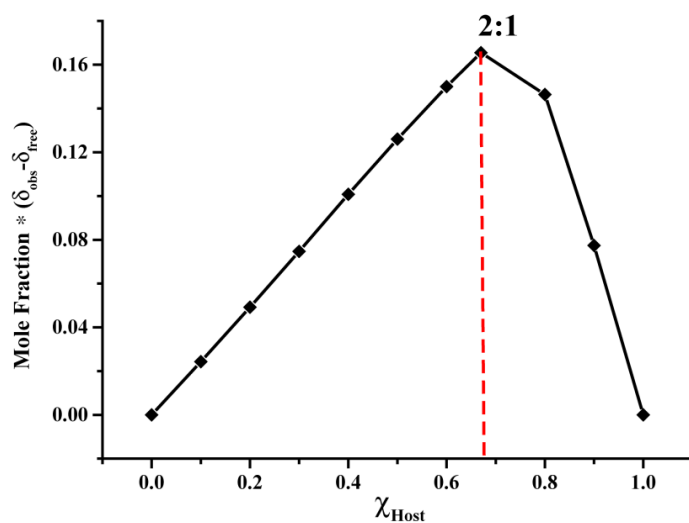

**Figure S80** Job plots between **5**  $\supset$  **G1** were obtained by plotting the chemical shift changes of the proton **I'** on heteroditopic cyclo[6]aramide **5** indicating a 2:1 stoichiometry.

#### Job plots of **5** $\supset$ **G4**

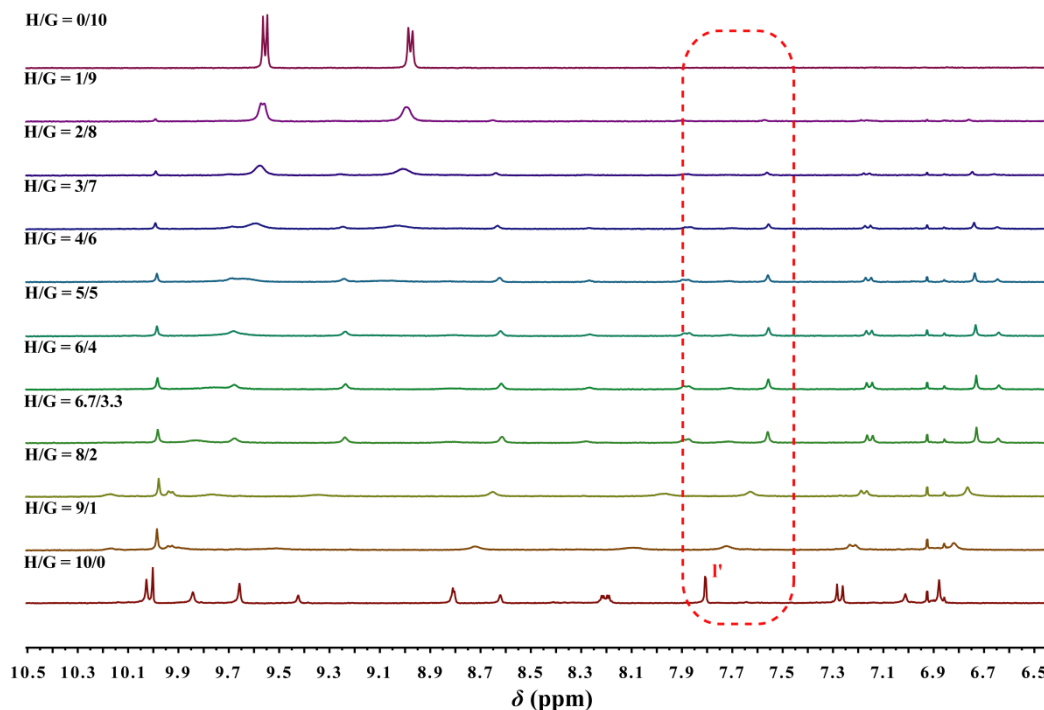

**Figure S81** Partial stacked  $^1\text{H}$  NMR spectra (400 MHz, 298 K,  $\text{CD}_3\text{COCD}_3$ ) of **5**  $\supset$  **G4** in the presence of the different ratio of **5** and **G4** at a fixed total concentration 1.0 mM.

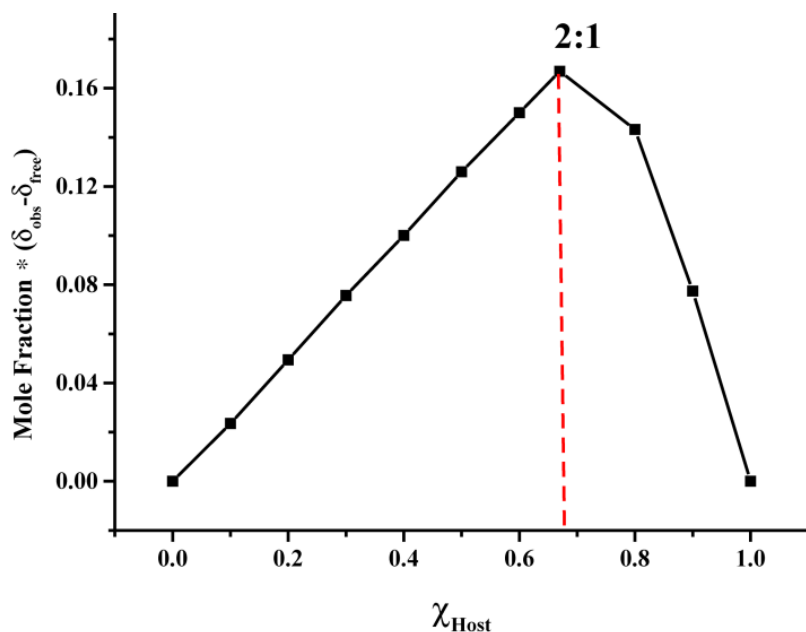

**Figure S82** Job plots between **5**<sub>2</sub> ⊃ **G4** were obtained by plotting the chemical shift changes of the proton P' on heteroditopic cyclo[6]aramide **5** indicating a 2:1 stoichiometry.

#### 4.5 Determination of the Stoichiometries and Binding Constants

To determine the binding constants ( $K_a$ ) for cyclo[6]aramide **1** binding with guests **G1-G4**, UV-vis titration experiments were done with  $\text{CH}_3\text{COCH}_3$  solutions which had a constant concentration of cyclo[6]aramide **1** and varying concentration of guests **G1-G4**. For each titration, at least 30 data points were collected. Typically wavelength was monitored around the absorption maxima for the complex formed. This gave data sets from which the binding constants were obtained using a custom written global nonlinear regression analysis program within the Matlab 8.1 by Thordarson<sup>[1]</sup>.

From the job plot and molar ratio plot, 2:1 stoichiometries were obtained for **1**<sub>2</sub> ⊃ **G1**, **1**<sub>2</sub> ⊃ **G2** and **1**<sub>2</sub> ⊃ **G4**. The binding constants ( $K_1$  and  $K_2$ ) were estimated by a non-linear curve-fitting method with the equation S-1:<sup>[1]</sup>

$$\Delta A = \frac{[G]_0 (\epsilon_{\Delta HG} K_1 [H] + 2\epsilon_{\Delta H_2G} K_1 K_2 [H]^2)}{1 + K_1 [H] + K_1 K_2 [H]^2} \quad \text{S-1}$$

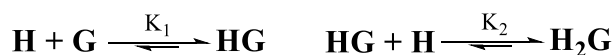

$$K_1 = \frac{[HG]}{[H][G]} \quad K_2 = \frac{[H_2G]}{[HG][H]} = \frac{[H_2G]}{K_1[H]^2[G]}$$

$$[H]_0 = [H] + [HG] + 2[H_2G] \quad [G]_0 = [G] + [HG] + [H_2G]$$

$$K_1 K_2 [H]^3 + (K_1 + 2K_1 K_2 [G]_0 - K_1 K_2 [H]_0) [H]^2 + (K_1 [G]_0 - K_1 [H]_0 + 1) [H] - [H]_0 = 0$$

(S-2)

This cubic equation S-2 is solved directly in Matlab3 and the results put into equation S-1.

Where  $[G]_0$  is the concentration of guests (G1, G2 and G4),  $[H]_0$  is the concentration of cyclo[6]aramide 1,  $\Delta A$  is the absorption change of the complex formed,  $\epsilon_{\Delta HG}$  is the molar extinction coefficient of 1 to 1 host-guest complex,  $\epsilon_{\Delta H_2G}$  is the molar extinction coefficient of 2 to 1 host-guest complex.

#### UV-vis titration experiments of 1<sub>2</sub> ⊃ G1

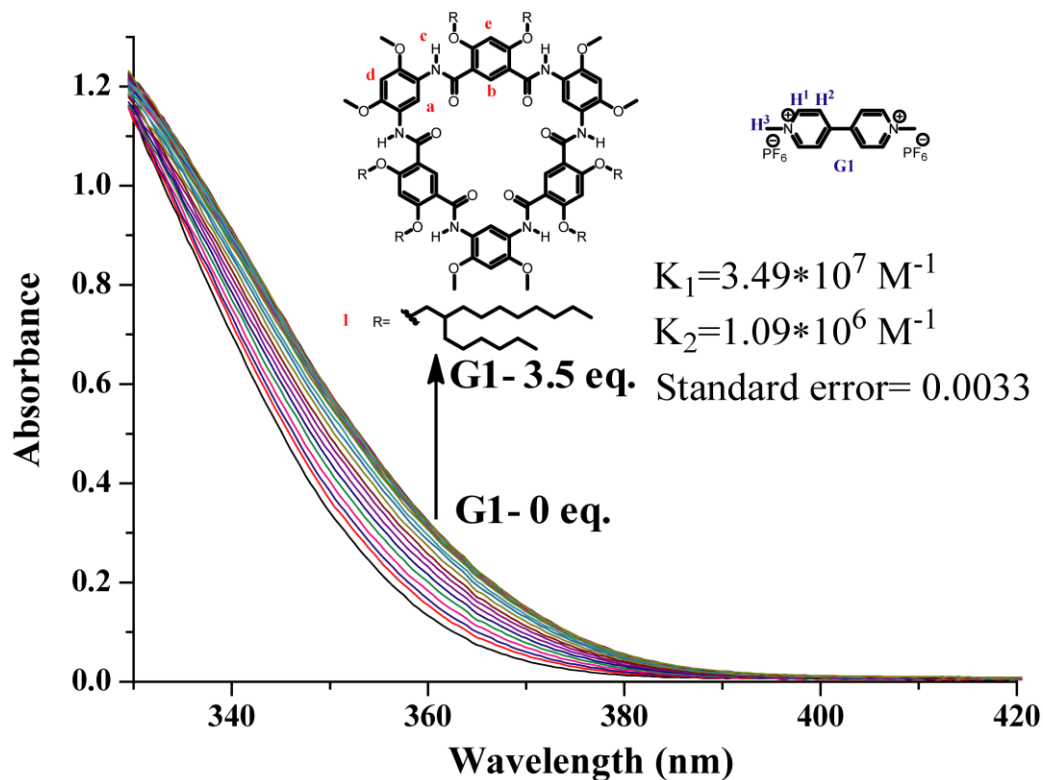

Figure S83 Stacked UV-vis spectra of 1 (20  $\mu\text{M}$ ) titrated with G1 in acetone from 0 equiv. to 3.5 equiv. at 298 K.

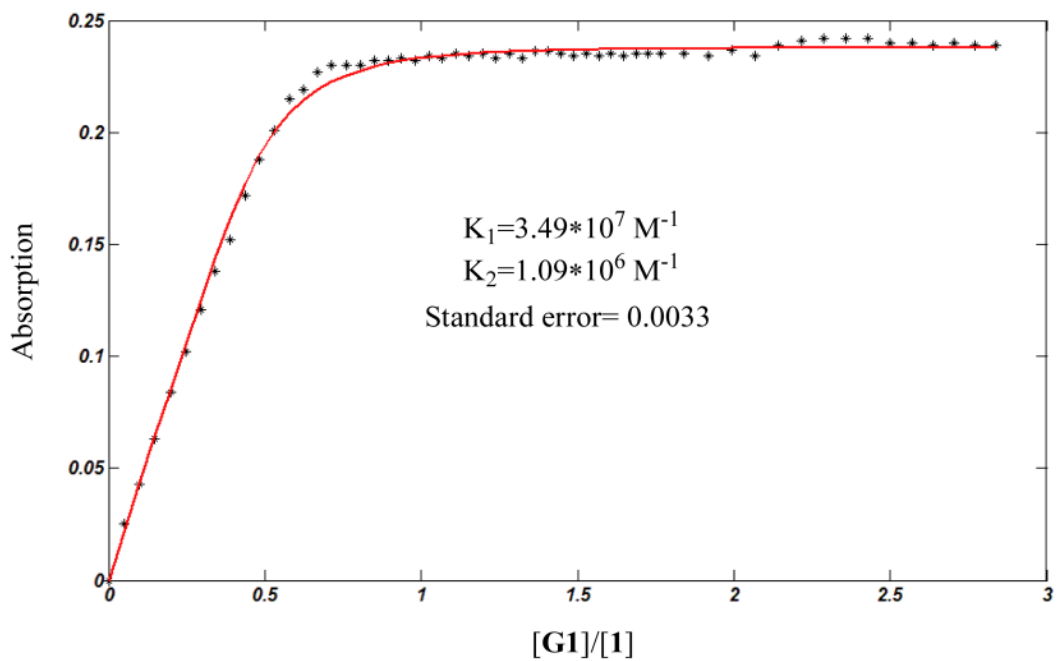

**Figure S84** The change of absorption of **1** titrated with **G1** at 352 nm in acetone. The red solid line was obtained from the non-linear curve-fitting with Eq. S-1.

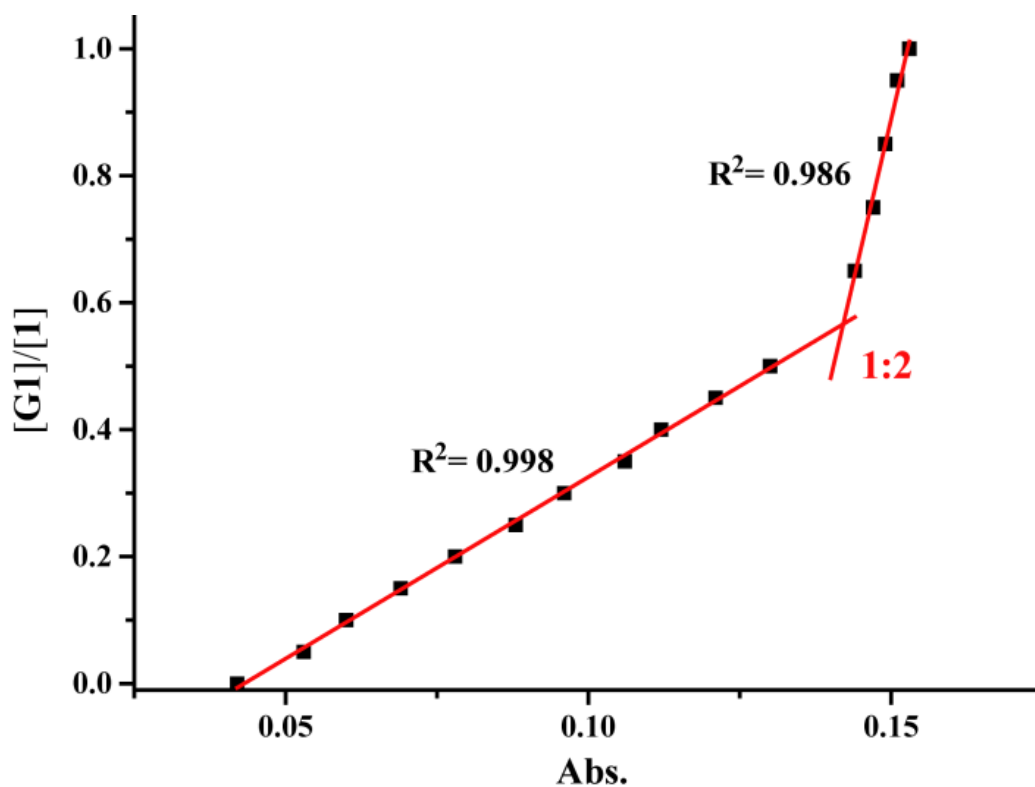

**Figure S85** Mole ratio plot for the complexation of **1** and **G1** in acetone indicating a 2:1 stoichiometry at 352 nm in acetone.

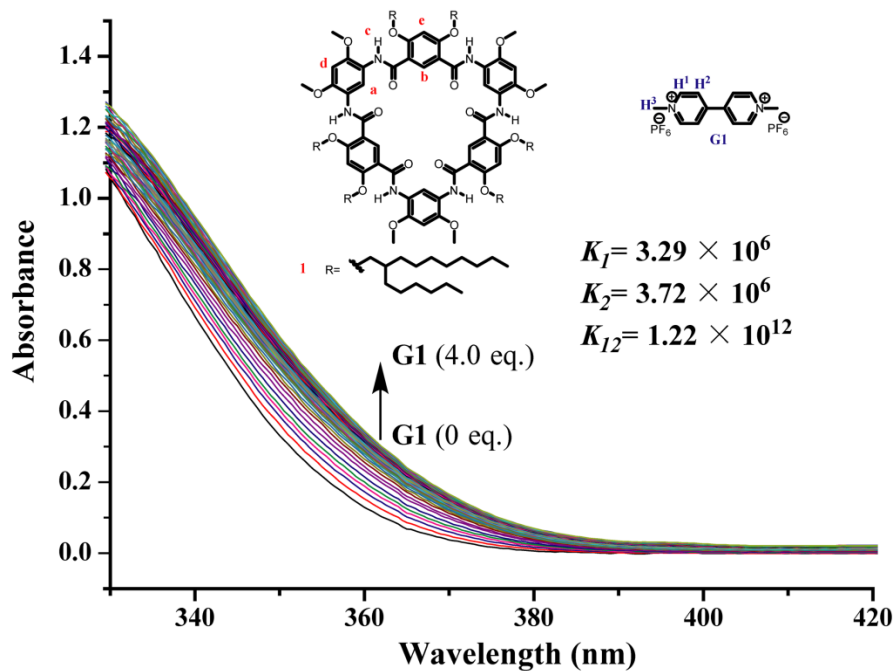

**Figure S86** Stacked UV-vis spectra of **1** (20  $\mu$ M) titrated with **G1** in acetone/DMSO (9/1, v/v) from 0 equiv. to 4.0 equiv. at 298 K.

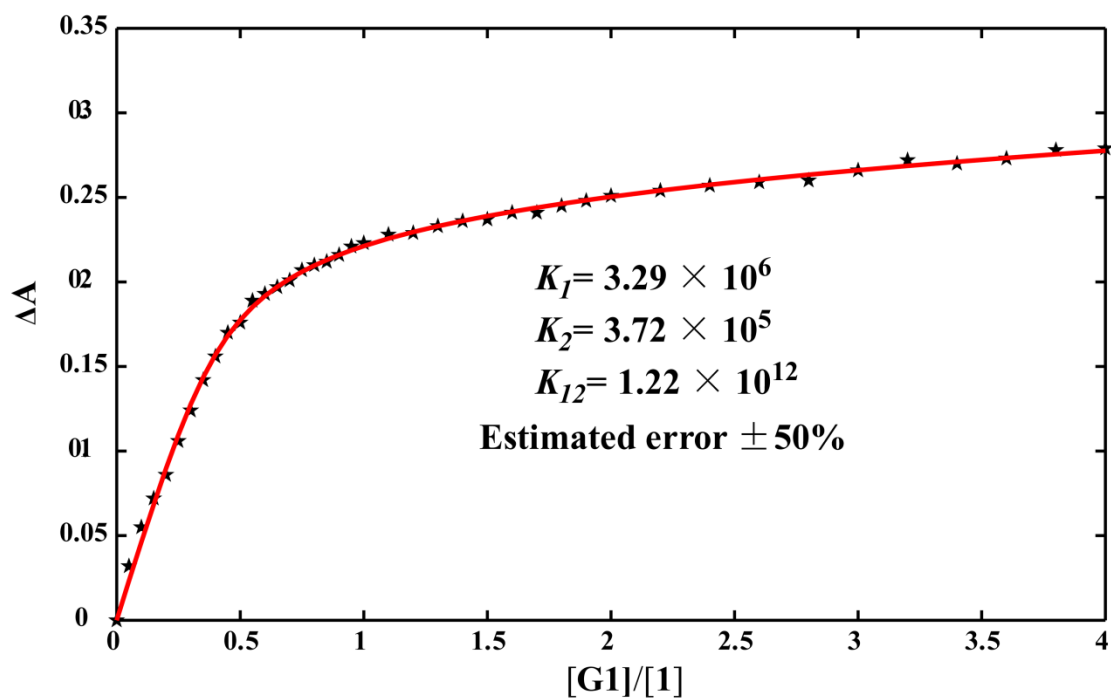

**Figure S87** The change of absorption of **1** titrated with **G1** at 353 nm in acetone/DMSO (9/1, v/v). The red solid line was obtained from the non-linear curve-fitting with Eq. S-1.

UV-vis titration experiments of  $1_2 \supset G2$

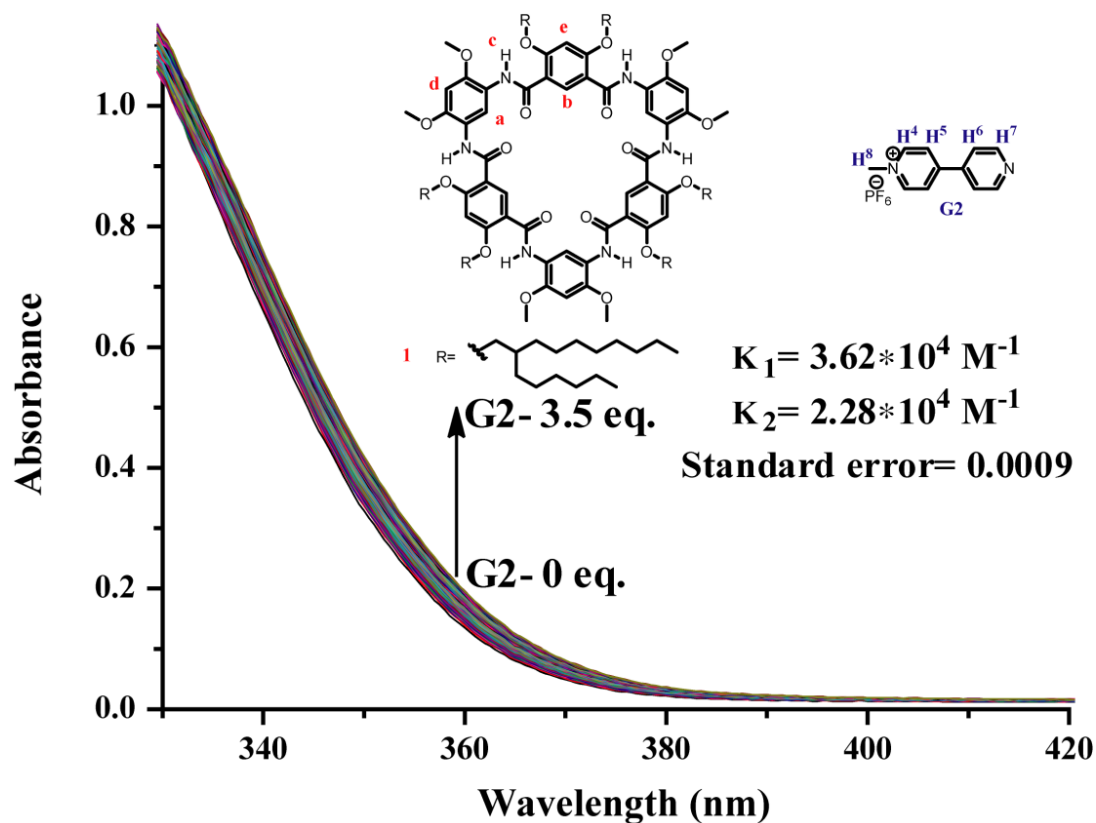

Figure S88 Stacked UV-vis spectra of  $1$  ( $20 \mu\text{M}$ ) titrated with  $G2$  in acetone from 0 equiv. to 3.5 equiv. at 298 K.

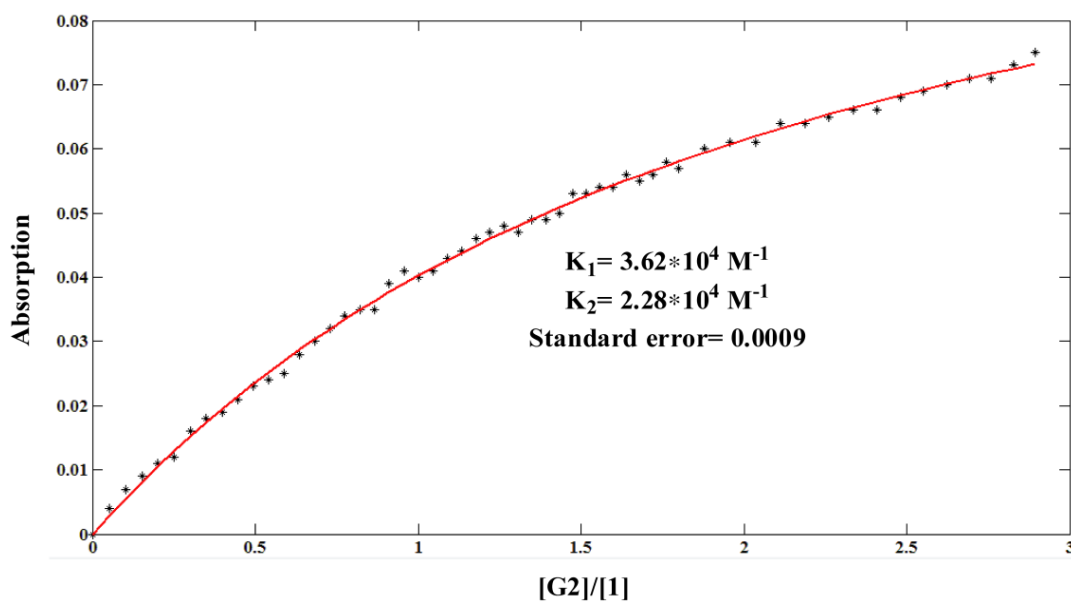

Figure S89 The change of absorption of  $1$  titrated with  $G2$  at 355 nm in acetone. The red solid line was obtained from the non-linear curve-fitting with Eq. S-1.

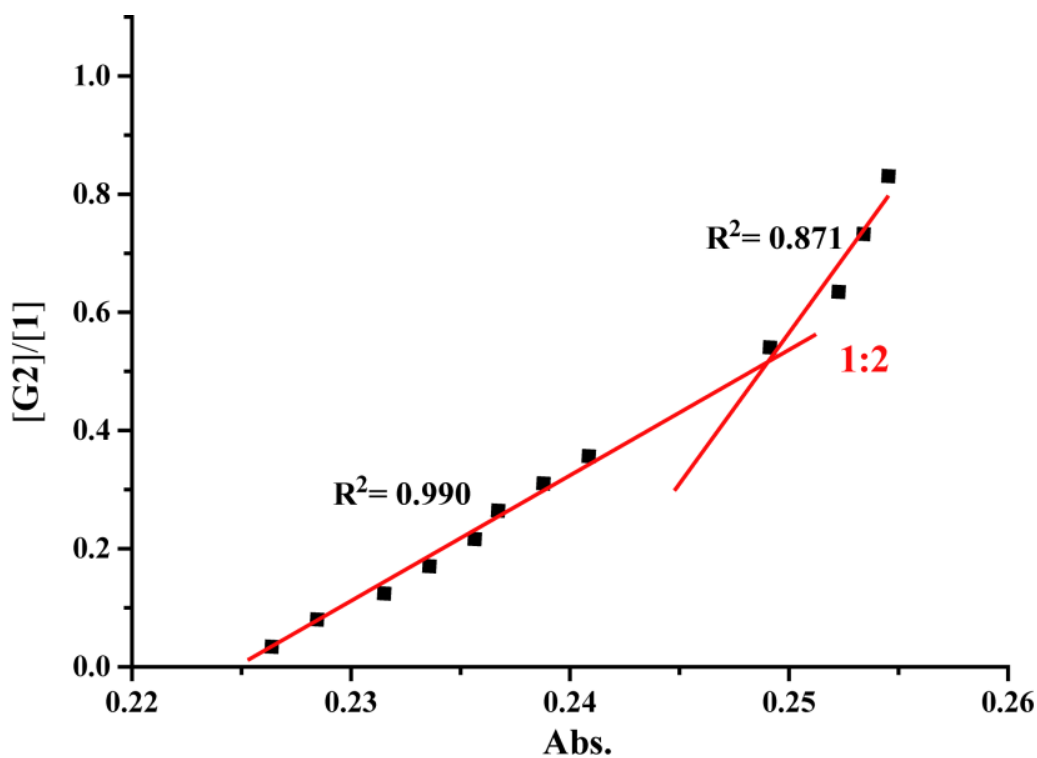

Figure S90 Mole ratio plot for the complexation of **1** and **G2** in acetone indicating a 2:1 stoichiometry at 355 nm in acetone.

UV-vis titration experiments of  $1_2 \supset G4$

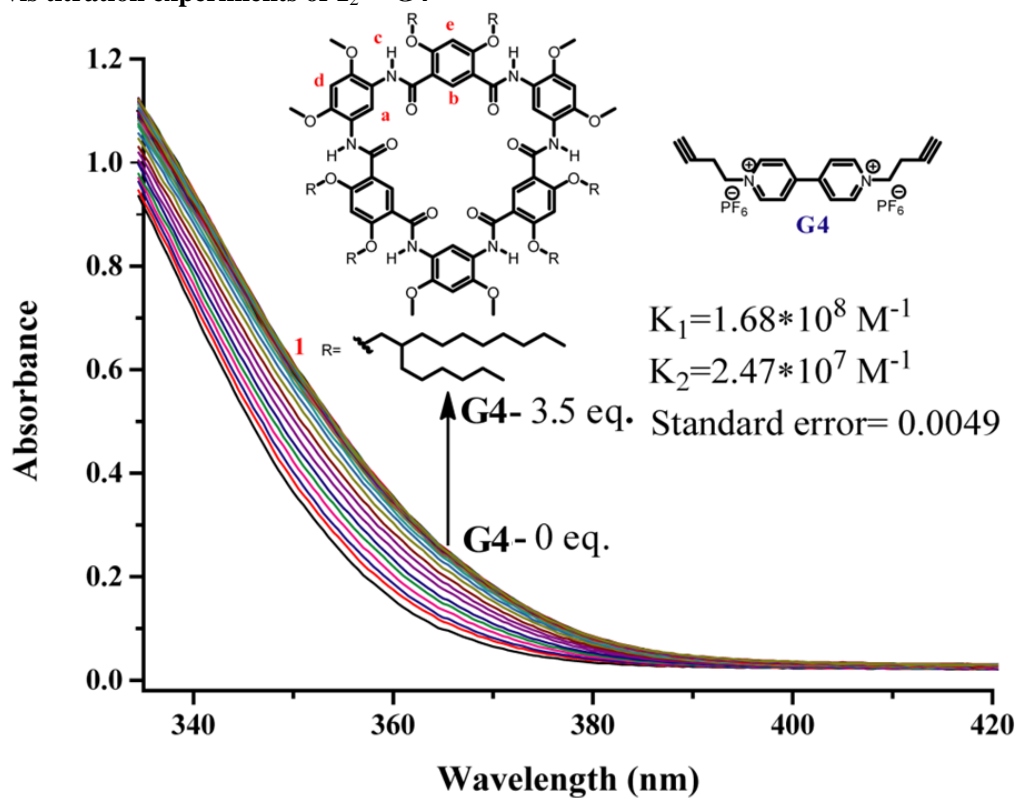

Figure S91 Stacked UV-vis spectra of **1** (20  $\mu\text{M}$ ) titrated with **G4** in acetone from 0 equiv. to 3.0 equiv. at 298 K.



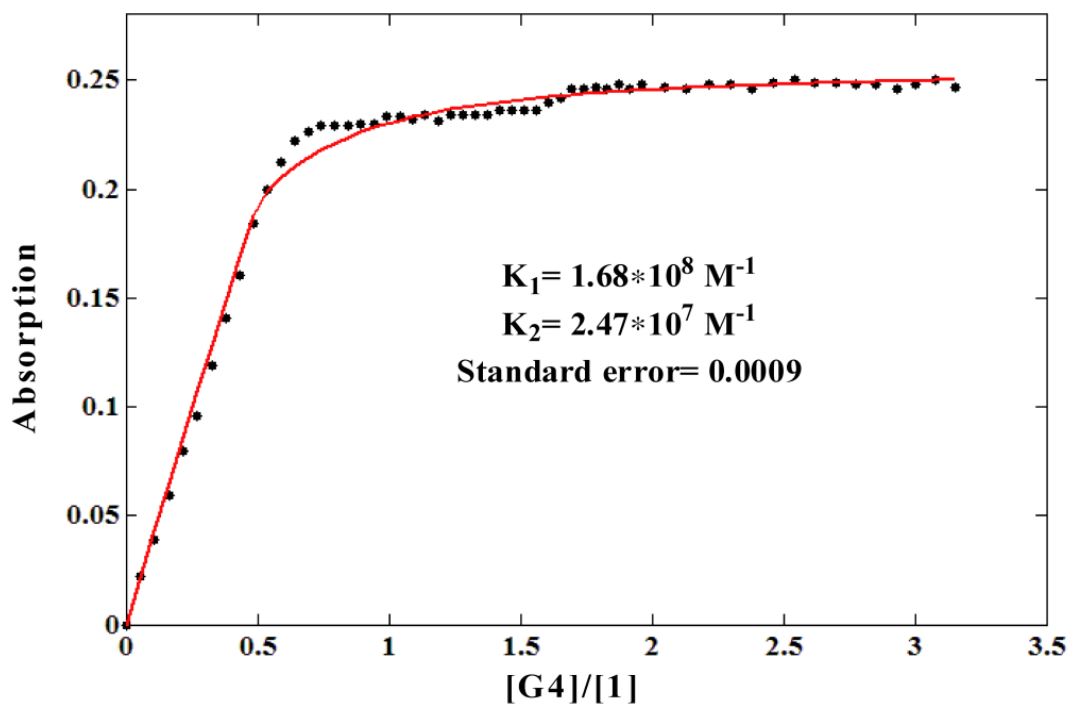

**Figure S92** The change of absorption of **1** titrated with **G4** at 350 nm in acetone. The red solid line was obtained from the non-linear curve-fitting with Eq. S-1.

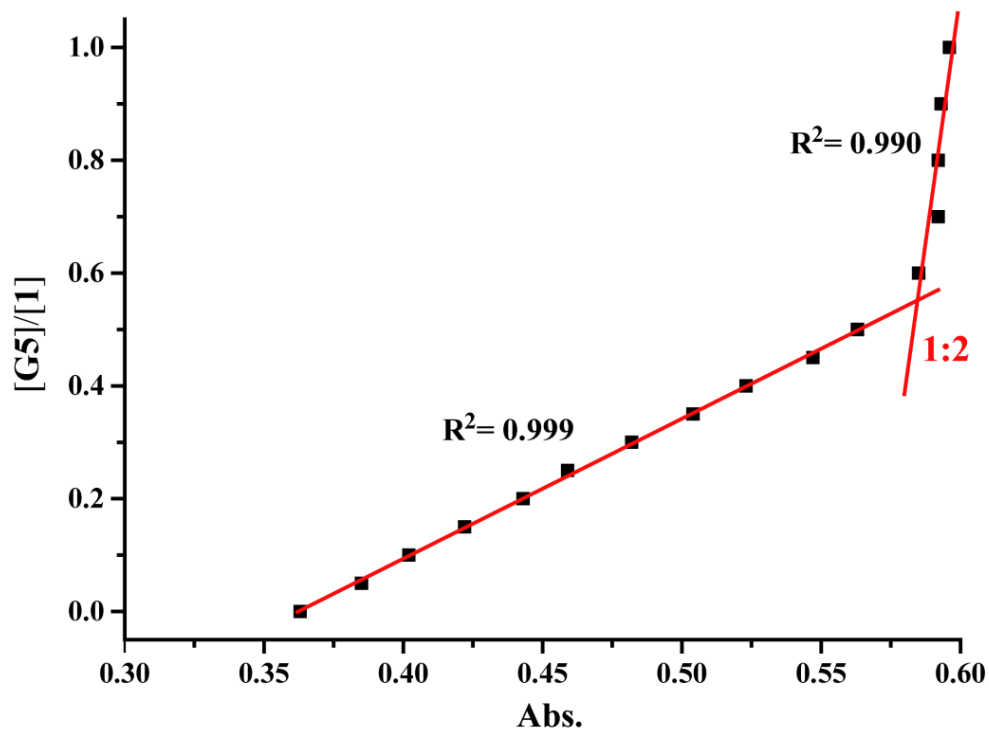

**Figure S93** Mole ratio plot for the complexation of **1** and **G4** in acetone indicating a 2:1 stoichiometry at 350 nm in acetone.

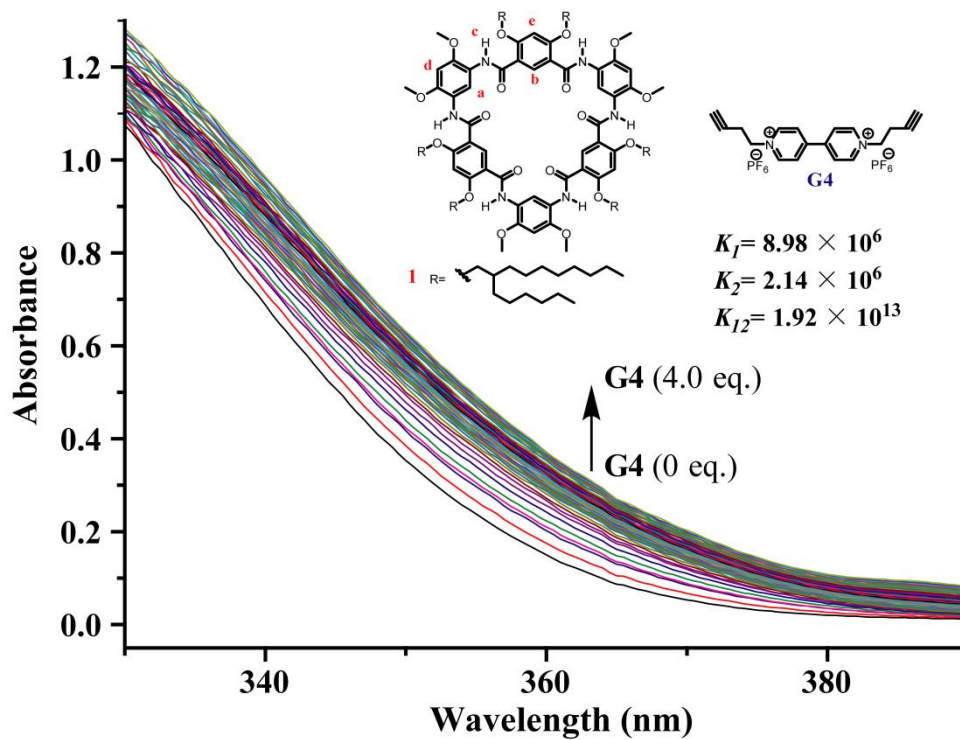

**Figure S94** Stacked UV-vis spectra of **1** (20  $\mu\text{M}$ ) titrated with **G4** in acetone/DMSO (9/1, v/v) from 0 equiv. to 4.0 equiv. at 298 K.

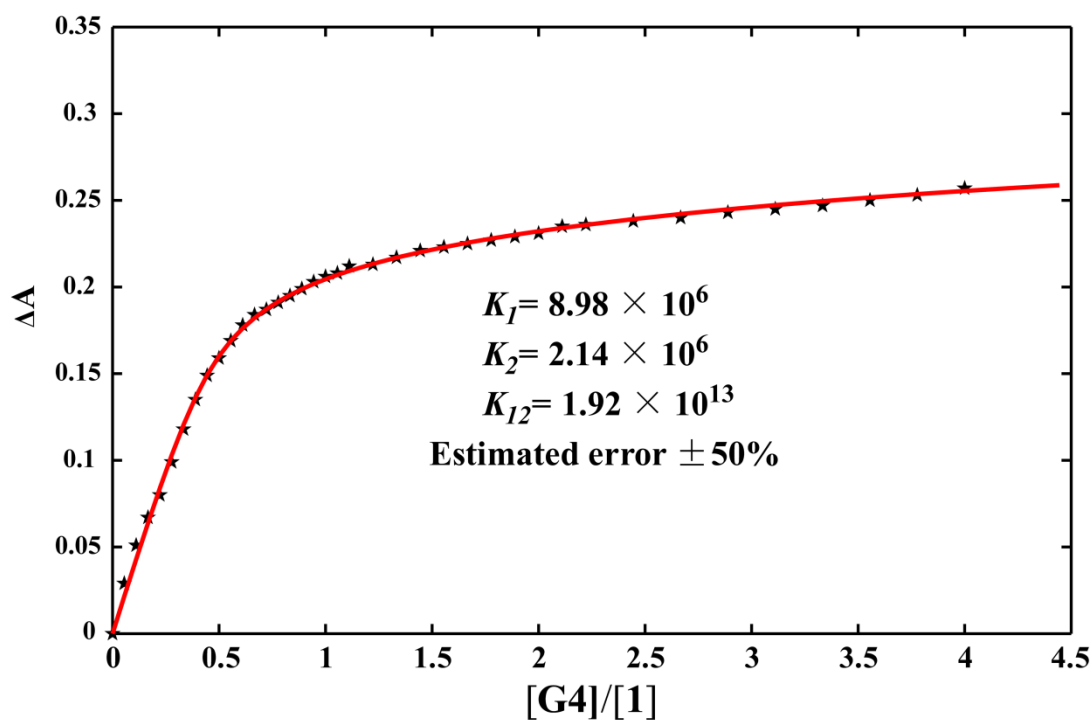

**Figure S95** The change of absorption of **1** titrated with **G4** at 354 nm in acetone. The red solid line was obtained from the non-linear curve-fitting with Eq. S-1.

From the job plot and molar ratio plot, a 1:1 stoichiometry was obtained for **1**  $\supset$  **G3**.

The binding constant ( $K_a$ ) was estimated by a non-linear curve-fitting method with the equation **S-3** by UV-vis titration experiments:<sup>[1]</sup>

$$\Delta A = \varepsilon_{\Delta HG} (0.5 \{ ([G]_0 + [H]_0 + 1/K_a) - \{ ([G]_0 + [H]_0 + 1/K_a)^2 + 4[H]_0[G]_0 \}^{0.5} \}) \quad \text{Eq. S-3}$$

Where  $[G]_0$  is the concentration of **G3**,  $[H]_0$  is the concentration of cyclo[6]aramide **1**,  $\Delta A$  is the absorption change of the complex formed,  $\varepsilon_{\Delta HG}$  is the molar extinction coefficient of 1 to 1 host-guest complex.

### UV-vis titration experiments of **1** $\supset$ **G3**

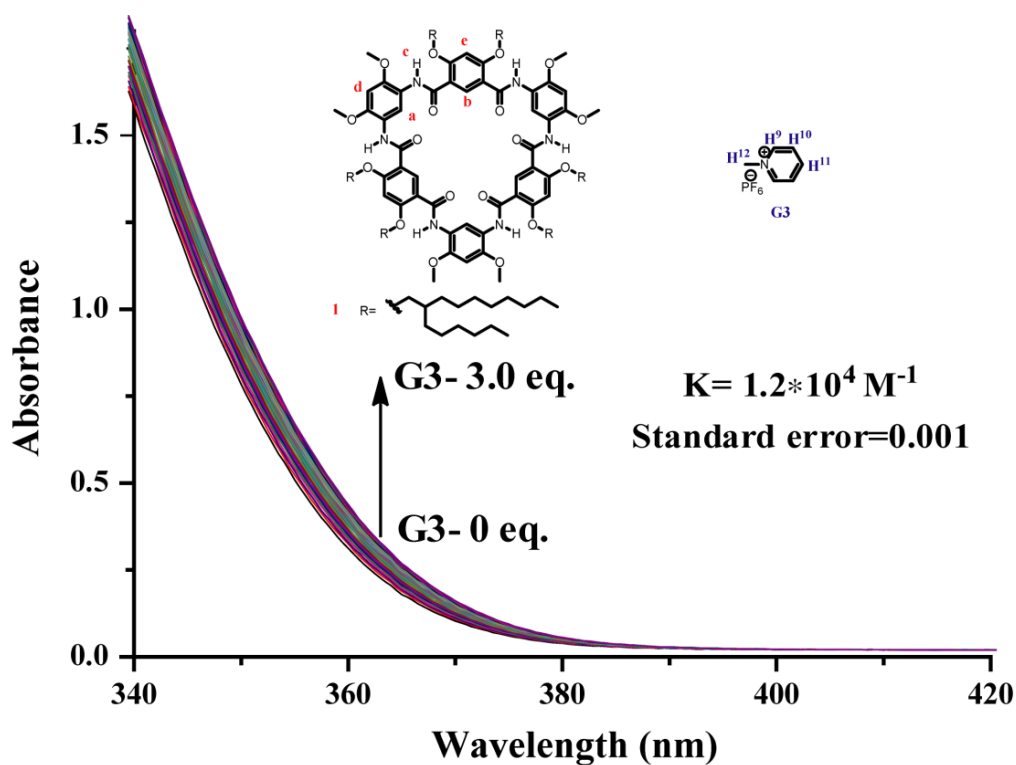

**Figure S96** Stacked UV-vis spectra of **1** (50  $\mu$ M) titrated with **G3** in acetone from 0 to 3.0 equiv. at 298 K.

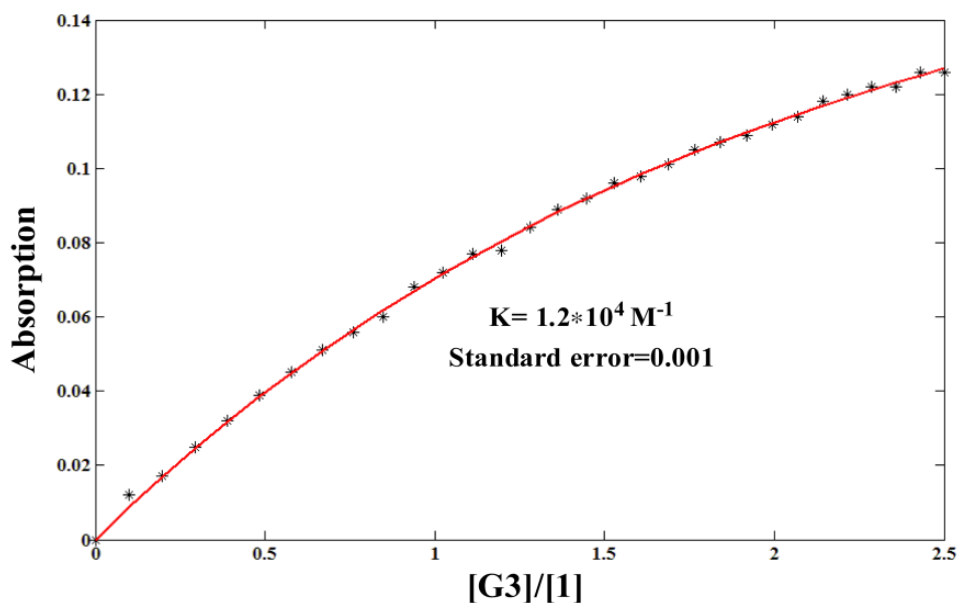

**Figure S97** The change of absorption of **1** titrated with **G3** at 360 nm in acetone. The red solid line was obtained from the non-linear curve-fitting with Eq. S-3.

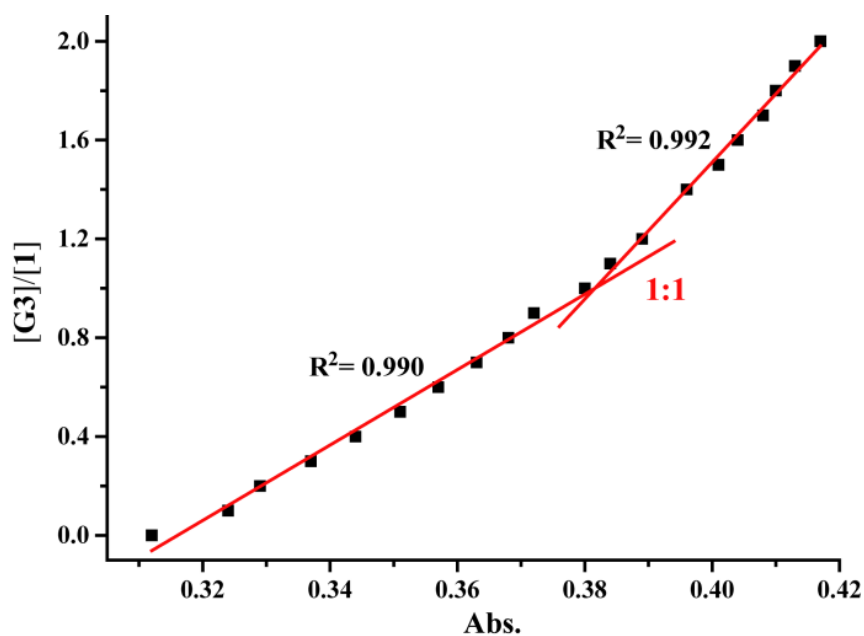

**Figure S98** Mole ratio plot for the complexation of **1** and **G3** in acetone indicating a 1:1 stoichiometry at 355 nm in acetone.

The binding constant of complex **1**  $\rightarrow$  **G3** in  $\text{CD}_3\text{COCD}_3$  was determined by NMR titration experiments with keeping the concentration of **G3** as a constant (1.0 mM) and varying the concentration of **1** (0-2.0 mM). The binding constant was determined by plotting the chemical shift of proton  $\text{H}^{10}$  on **G3** versus the concentration of **1** based on

the following equation <sup>[2]</sup>:

$$\delta_{obs} = \delta_f + \frac{\delta_b - \delta_f}{2[H]_0} \left\{ \frac{1}{K_a} + [G]_0 + [H]_0 - \sqrt{\left( \frac{1}{K_a} + [G]_0 + [H]_0 \right)^2 - 4[H]_0[G]_0} \right\} \quad \text{Eq. S-4}$$

where  $\delta_{obs}$  is the observed chemical shift of proton H<sup>10</sup>;  $\delta_b$  is the chemical shift of proton H<sup>10</sup> in complex;  $\delta_f$  is the chemical shift of proton H<sup>10</sup> in free **G3**;  $[H]_0$  is the total concentration of **1**;  $[G]_0$  is the total concentration of **G3**;  $K_a$  is the binding constant.

The binding constants for **5**<sub>2</sub>  $\supset$  **G4** ( $K_1$  and  $K_2$ ) were estimated by a non-linear curve-fitting method with the equation **S-5** and **S-6**:<sup>[1]</sup>

$$\Delta\delta = (\delta_{\Delta HG} K_1 [G]_0 [H] + 2\delta_{\Delta H_2G} K_1 K_2 [G]_0 [H]^2) / ([H]_0 (1 + K_1 [H] + K_1 K_2 [H]^2)) \quad \text{Eq. S-5}$$

$$[H]^3 (K_1 K_2) + [H]^2 \{ K_1 (2K_2 [G]_0 - K_2 [H]_0 + 1) \} + [H] \{ K_1 ([G]_0 - [H]_0 + 1) \} - [H]_0 = 0 \quad \text{Eq. S-6}$$

Where  $[G]_0$  is the concentration of guest **G4**,  $[H]_0$  is the concentration of cyclo[6]aramide **5**,  $\Delta\delta$  is the chemical shift changes of the complex formed,  $\delta_{\Delta HG}$  is the molar extinction coefficient of 1 to 1 host-guest complex,  $\delta_{\Delta H_2G}$  is the molar extinction coefficient of 2 to 1 host-guest complex.

### <sup>1</sup>H NMR titration experiments for **1** $\supset$ **G3**

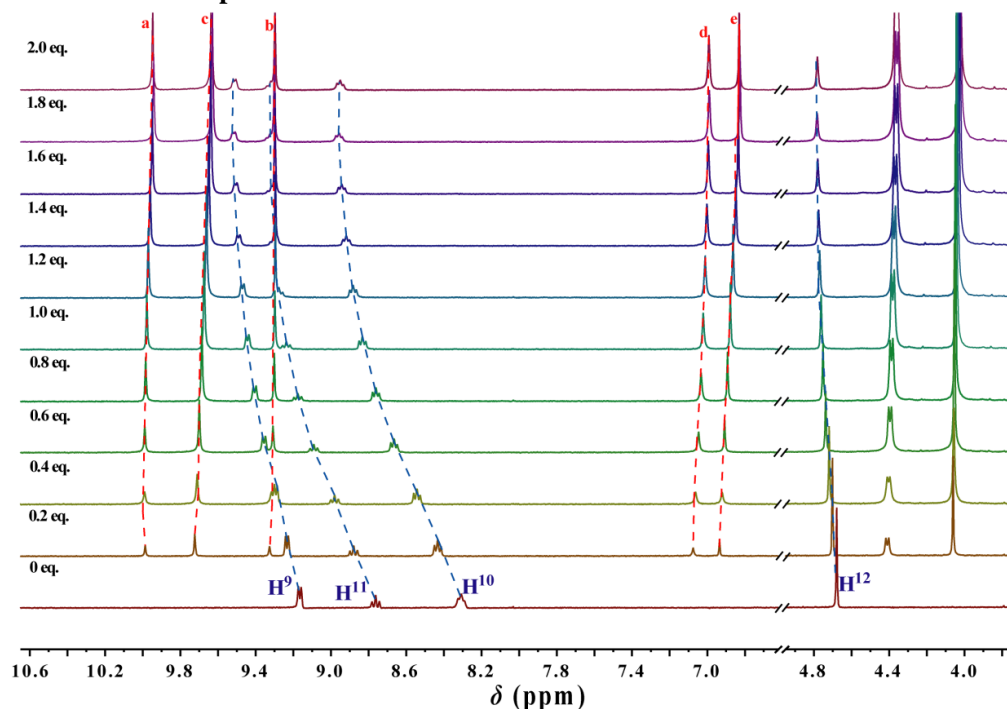

**Figure S99** Stacked plots of <sup>1</sup>H NMR spectra of **G3** (1 mM) titrated with **1** (0-2.0 mM) in acetone-d<sub>6</sub> (400 MHz, 298 K).

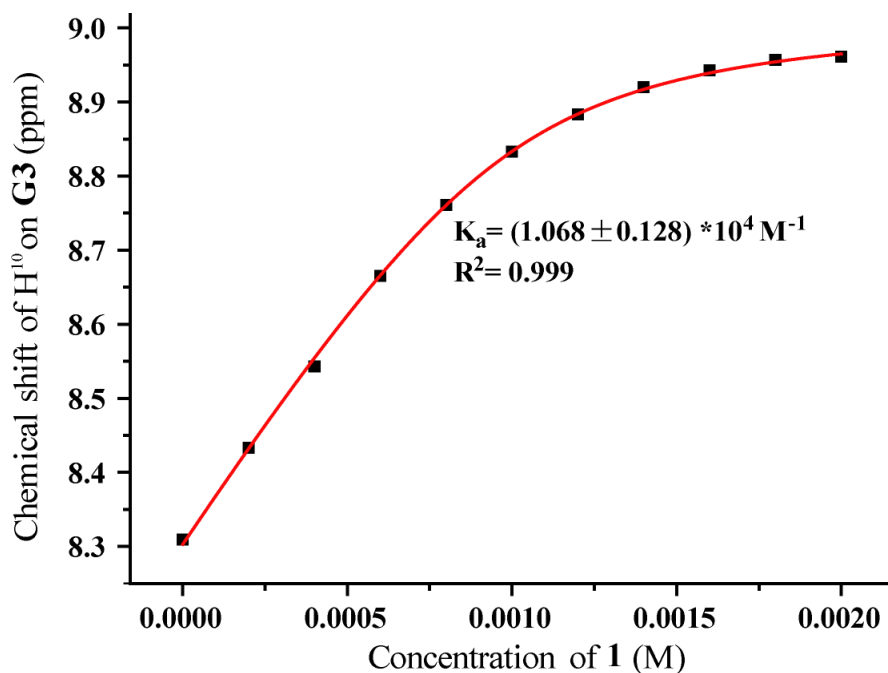

**Figure S100** Determination of the binding constant of **1**  $\rightarrow$  **G3** in acetone at 298 K. Fitting result based on H<sup>10</sup>. **Figure 8** Changes of the chemical shift changes of proton I' on **4** with addition of **G4** (The red solid line was obtained from the non-linear curve-fitting using above equations)

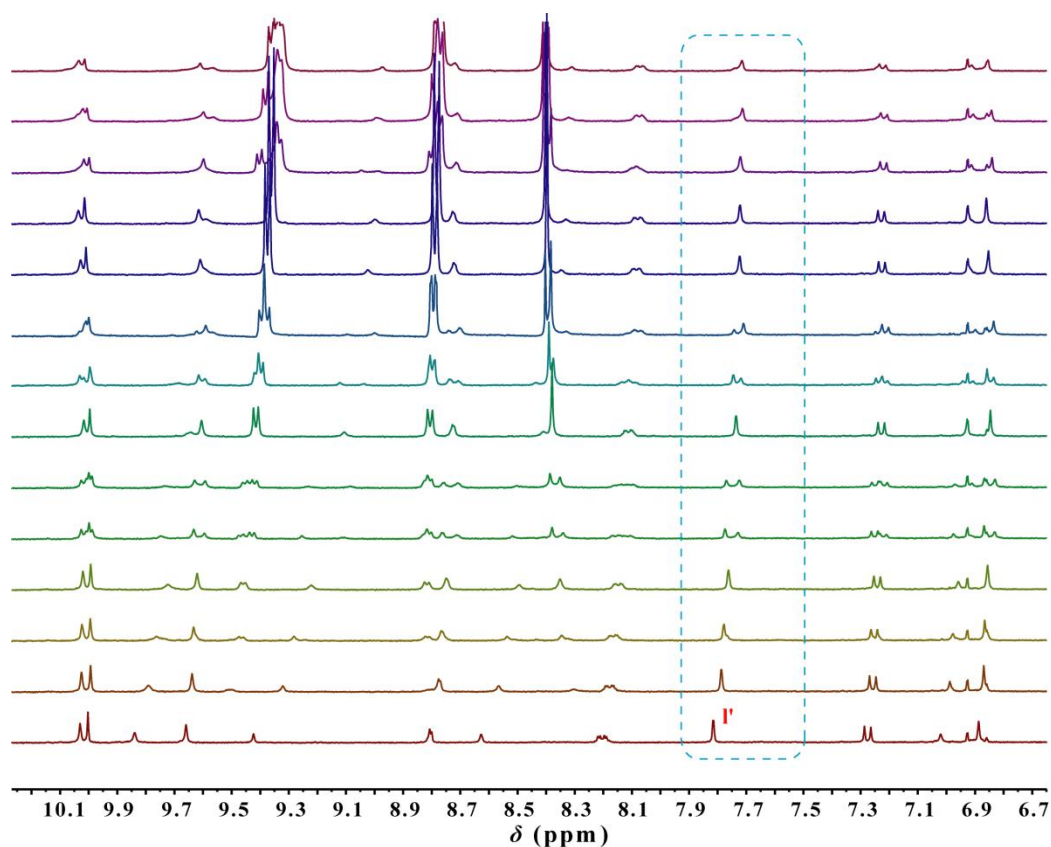

**Figure S101** Partial stacked <sup>1</sup>H NMR spectra (400 MHz, 298 K, CD<sub>3</sub>COCD<sub>3</sub>, 1 mM) of **5<sub>2</sub>**  $\rightarrow$  **G4** in the presence of the different concentration of **G4** (0-6.0 eq.).

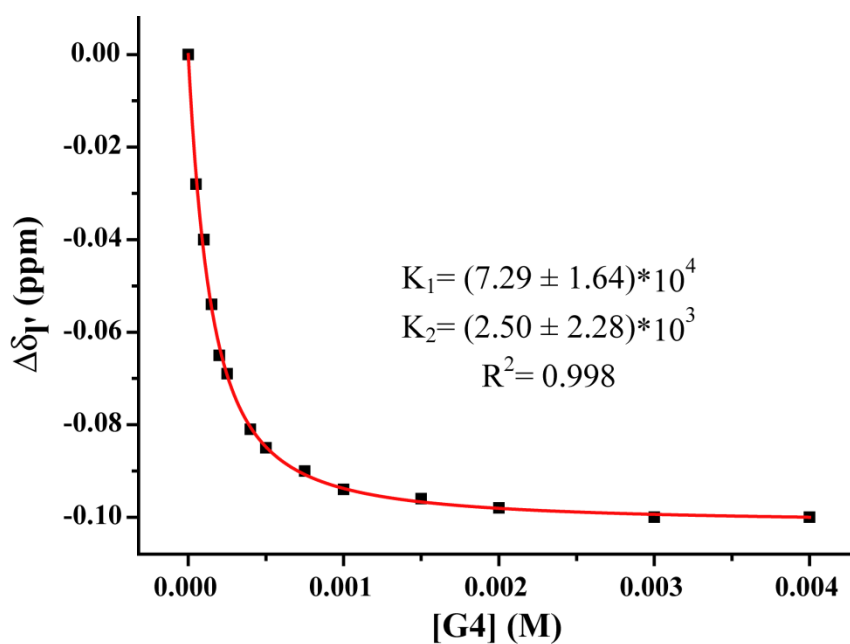

**Figure S102** Changes of the chemical shift changes of proton I' on **5** with addition of **G4** (The red solid line was obtained from the non-linear curve-fitting using above equations **S-5** and **S-6**).

We can quantify the extent of this cooperativity with the interaction parameter  $\alpha$  according to **Eq. S-5**.<sup>[1]</sup> If  $\alpha > 1$  the system displays positive cooperativity, if  $\alpha < 1$  it displays negative cooperativity and if  $\alpha = 1$ , the system displays non-cooperative binding.

$$\alpha = \frac{4K_2}{K_1} \quad \text{Eq. S-5}$$

## References

- [1] Thordarson, P., *Chem. Soc. Rev.* **2011**, *40*, 1305-1323.  
 [2] Bisson, A. P.; Carver, F. J.; Eggleston, D. S.; Haltiwanger, R. C.; Hunter, C. A.; Livingstone, D. L.; McCabe, J. F.; Rotger, C.; Rowan, A. E., *J. Am. Chem. Soc.*, **2000**, *122*, 8856.

## 4.6 MALDI-TOF-MS Spectra of Complexes

Matrix-assisted laser ionization time of flight mass spectrometry (MALDI-TOF-MS) analyses of cyclo[6]aramide **1** carried in the presence of each of the guests **G1-G4** produced several ions consistent with the formation of host-guest complexes.

### MALDI-TOF-MS Spectra of $1_2 \supset G1$

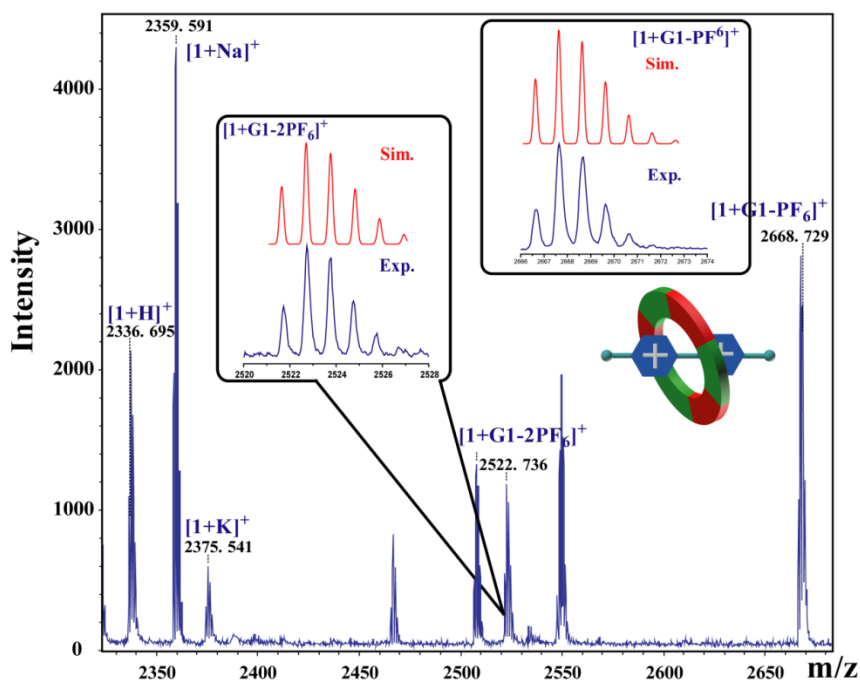

**Figure S103** Partial MALDI-TOF mass spectrum of a mixture of  $1_2 \supset G1$  (1:1) (inset: experimental isotope distribution (blue) and computer simulation (red)).



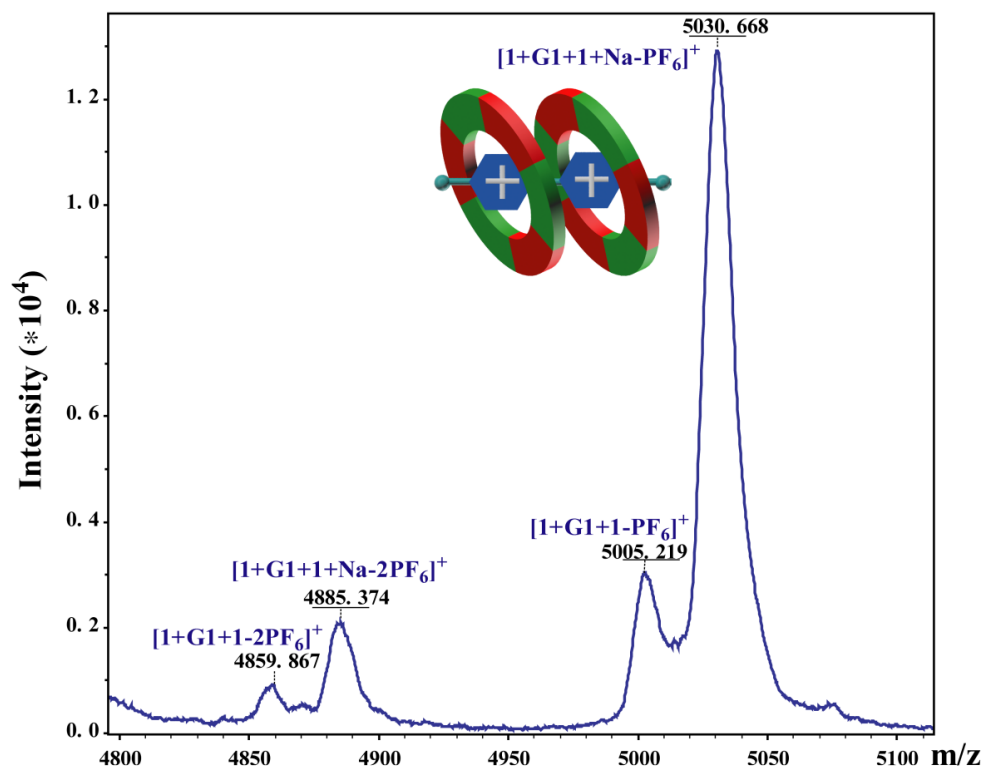

Figure S104 Partial MALDI-TOF mass spectrum of a mixture of  $1_2 \supset G1$  (2:1).

#### MALDI-TOF-MS Spectra of $1_2 \supset G2$

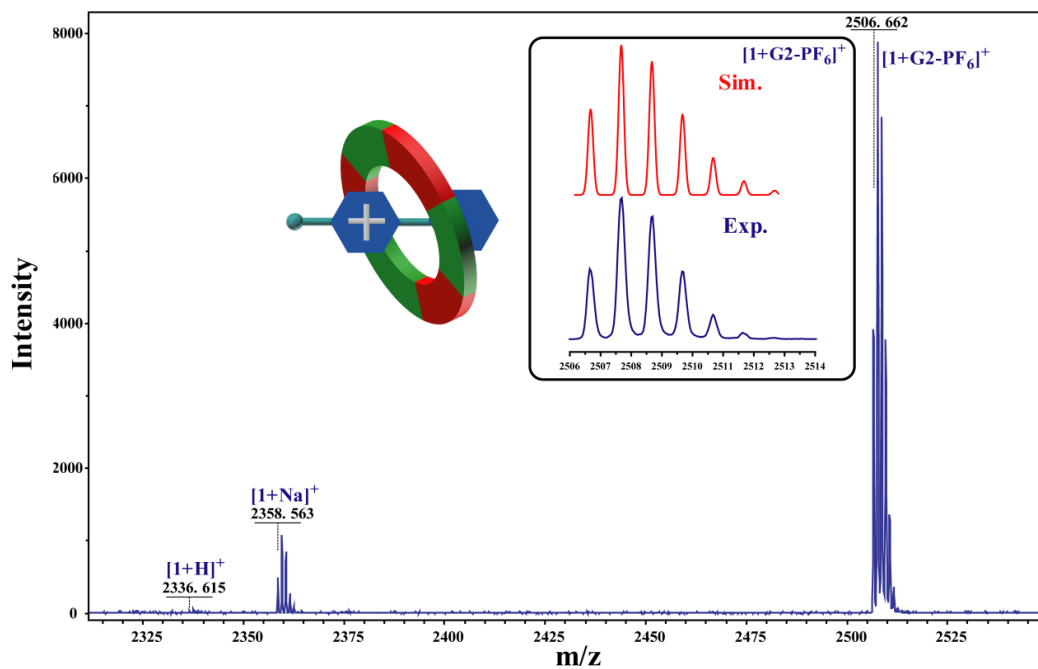

Figure S105 Partial MALDI-TOF mass spectrum of a mixture of  $1_2 \supset G2$  (1:1) (inset: experimental isotope distribution (blue) and computer simulation (red)).

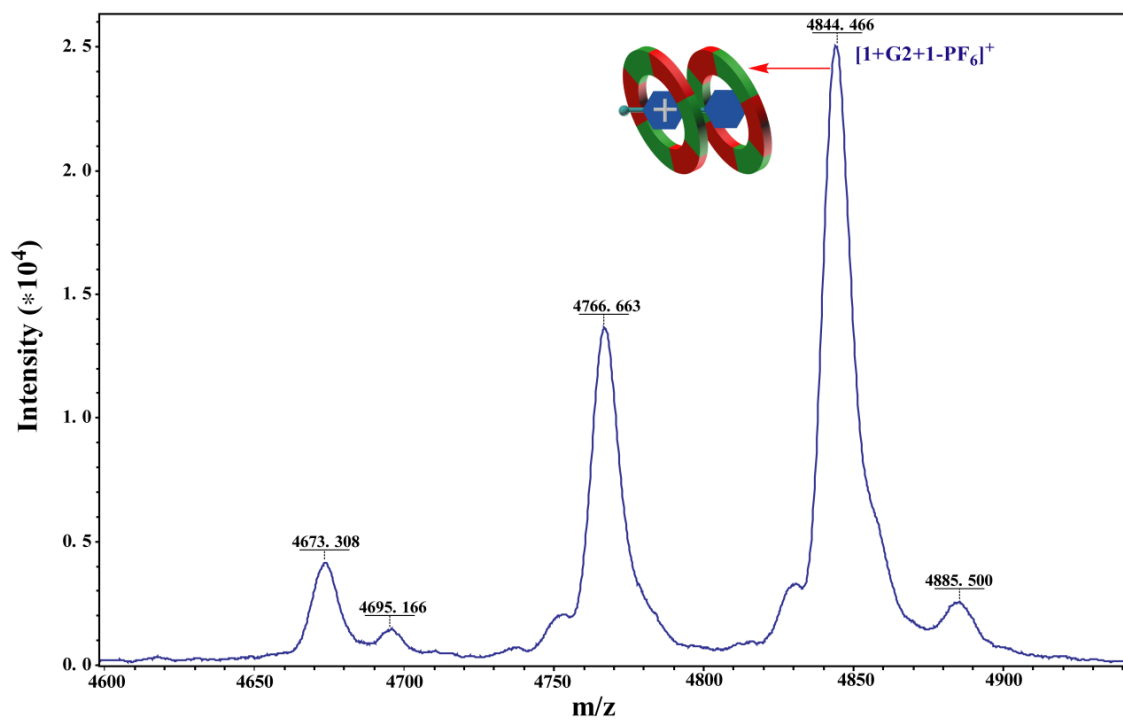

**Figure S106** Partial MALDI-TOF mass spectrum of a mixture of  $\mathbf{1}_2 \supset \mathbf{G2}$  (2:1).

#### MALDI-TOF-MS Spectra of $\mathbf{1} \supset \mathbf{G3}$

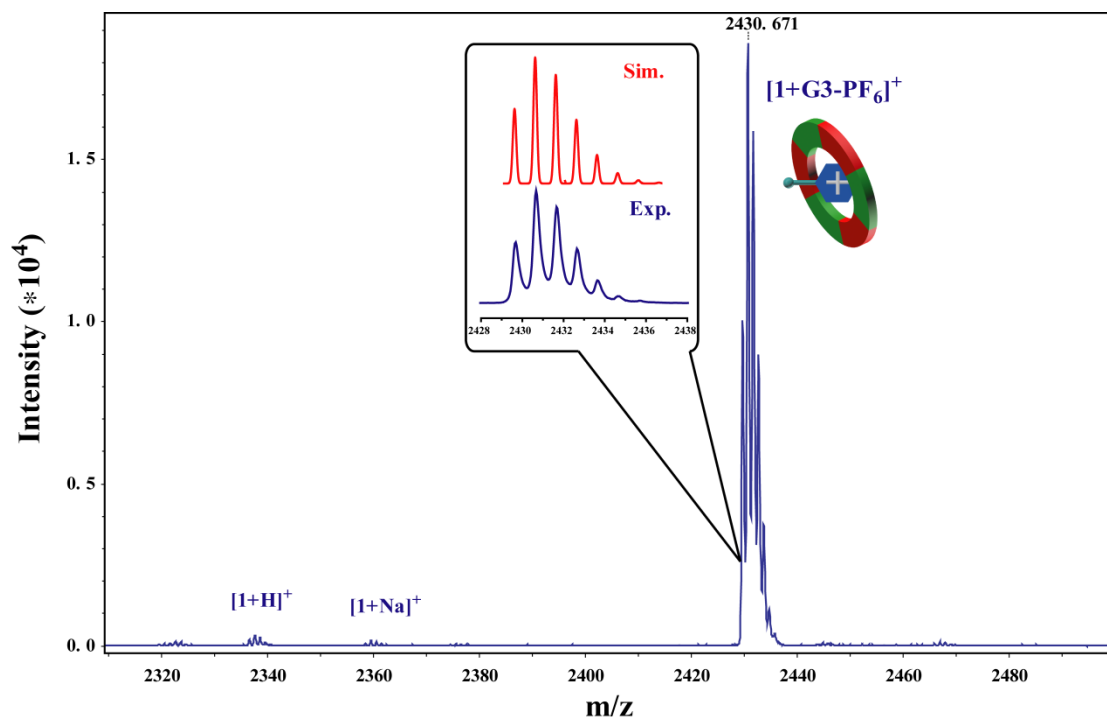

**Figure S107** Partial MALDI-TOF mass spectrum of a mixture of  $\mathbf{1} \supset \mathbf{G3}$  (1:1) (inset: experimental isotope distribution (blue) and computer simulation (red)).

### MALDI-TOF-MS Spectra of $1_2 \supset G4$

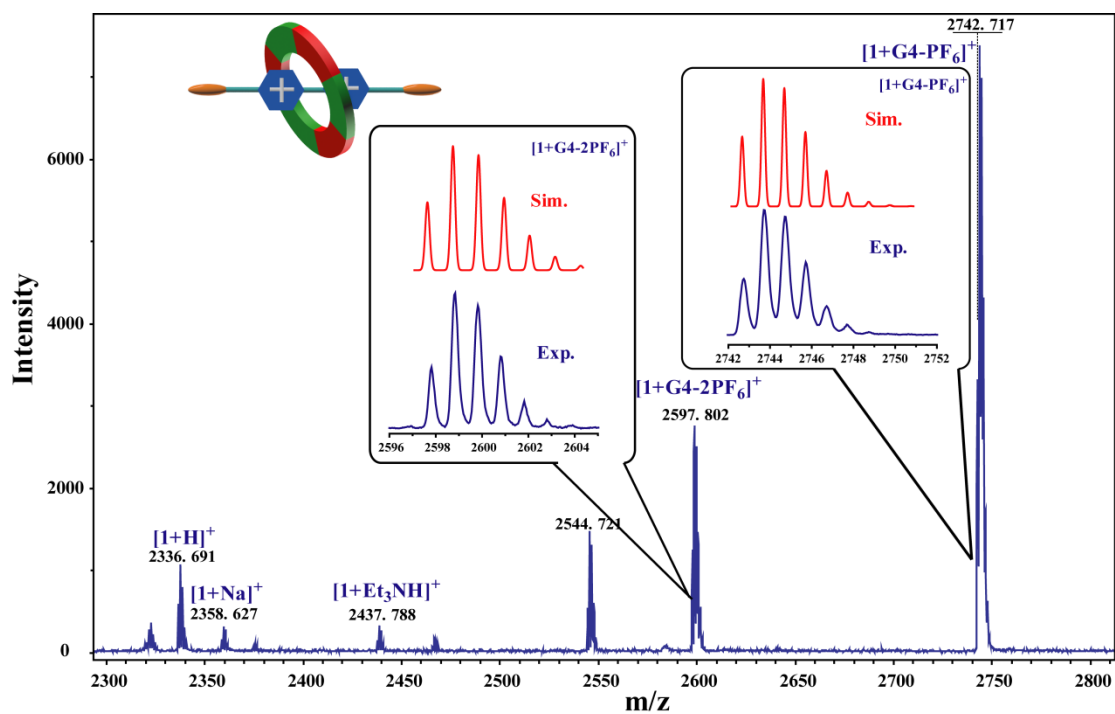

**Figure S108** Partial MALDI-TOF mass spectrum of a mixture of  $1_2 \supset G4$  (1:1) (inset: experimental isotope distribution (blue) and computer simulation (red)).

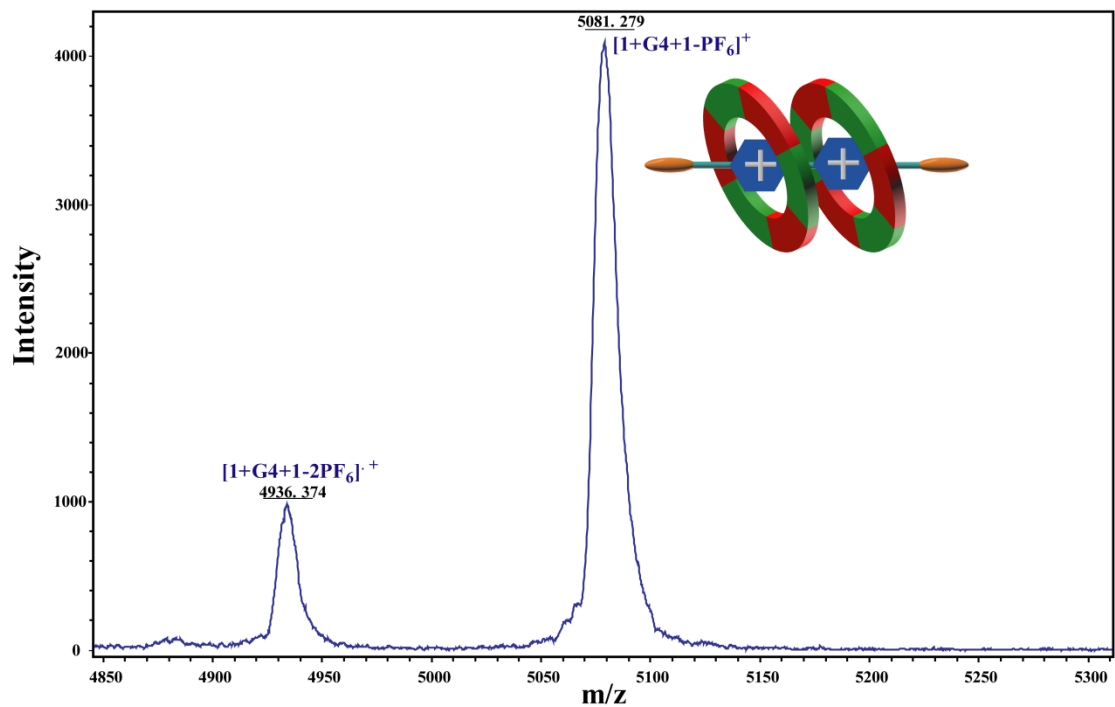

**Figure S109** Partial MALDI-TOF mass spectrum of a mixture of  $1_2 \supset G4$  (2:1).

## 4.7 FT-IR Spectra of Complexes

Fourier transform infrared spectrometry (FT-IR) analyses of cyclo[6]aramide **1** carried in the presence of each of the guest **G1-G4** produced  $\nu_{\text{C=O}}$  shifts consistent with the formation of solid phase host-guest complexes.

FT-IR spectra of **1**<sub>2</sub>  $\supset$  **G1**

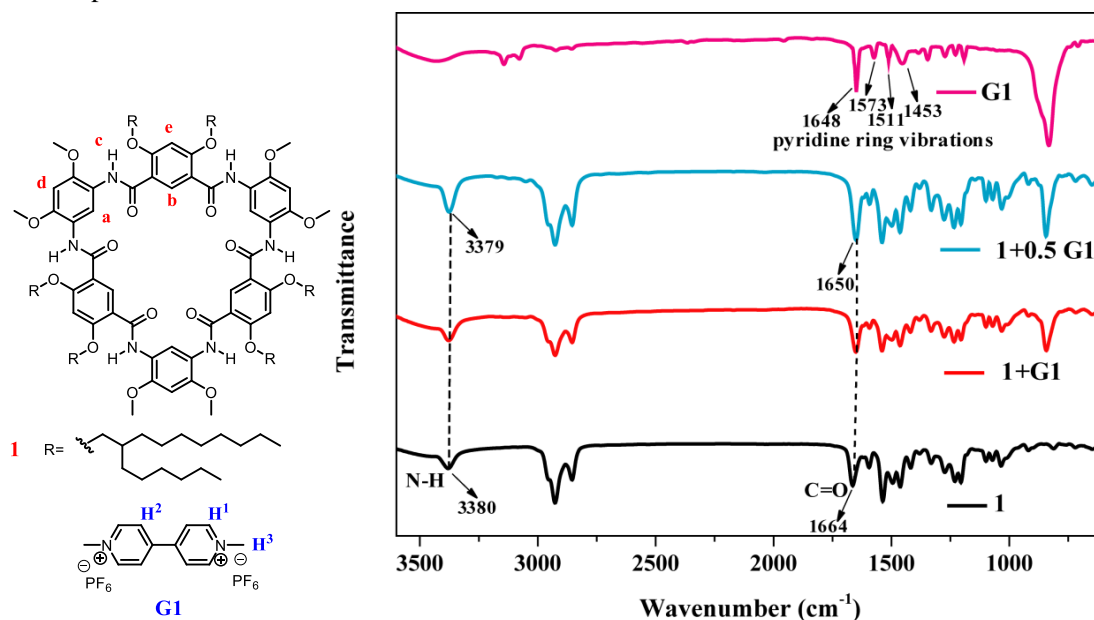

Figure S110 FT-IR spectra of **1** in the different equivalent of **G1**

FT-IR spectra of **1**<sub>2</sub>  $\supset$  **G2**

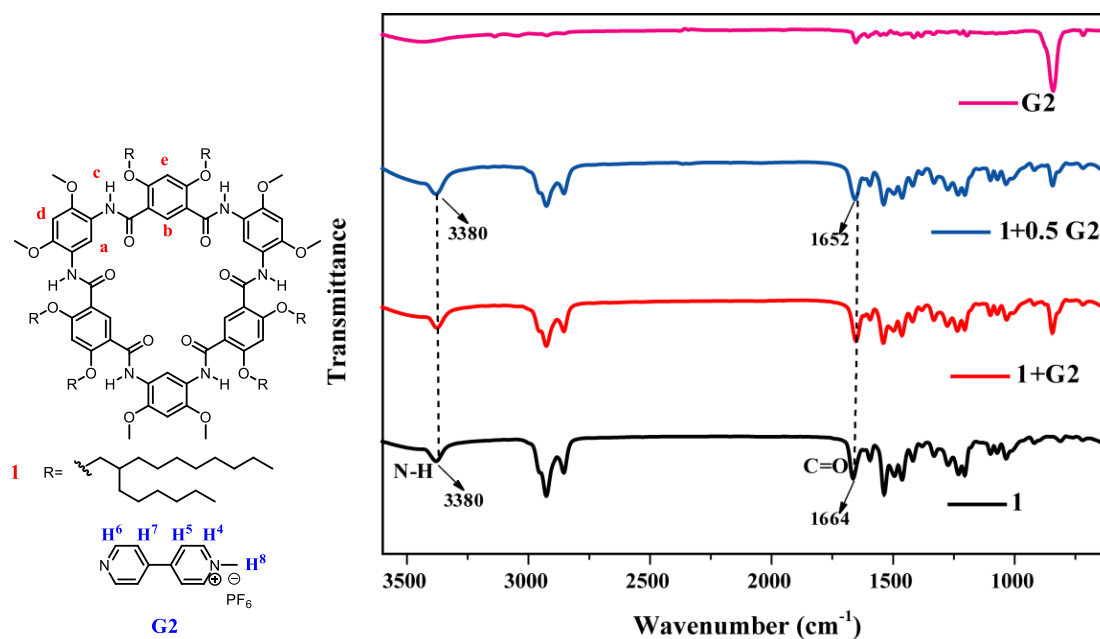

Figure S111 FT-IR spectra of **1** in the different equivalent of **G2**

FT-IR spectra of **1**  $\supset$  **G3**

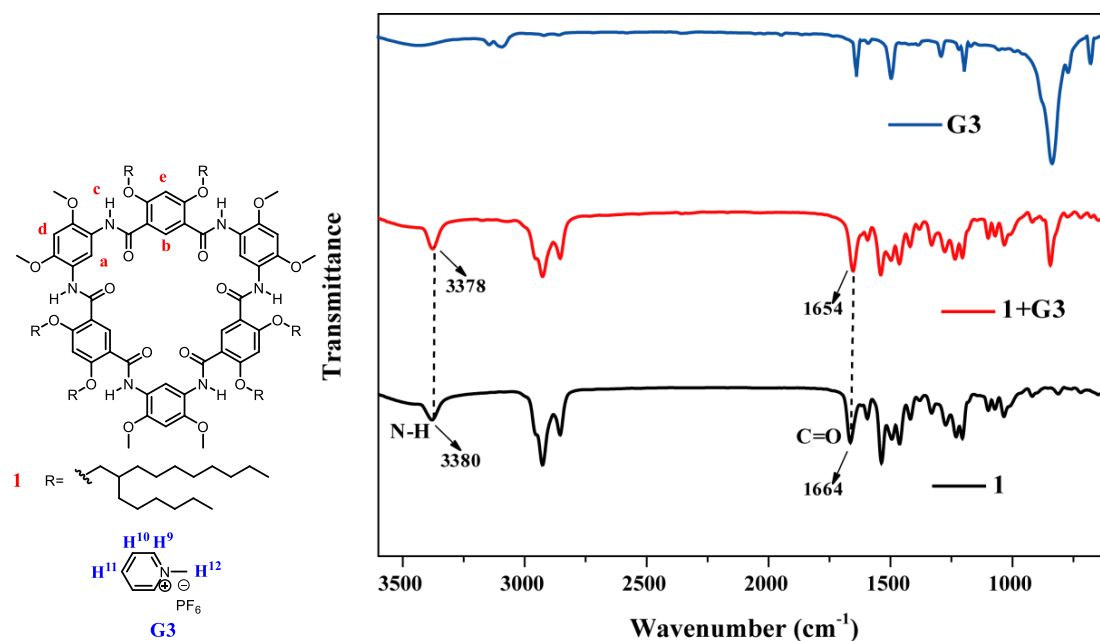

Figure S112 FT-IR spectra of **1** in the different equivalent of **G3**

FT-IR spectra of **1**<sub>2</sub>  $\supset$  **G4**

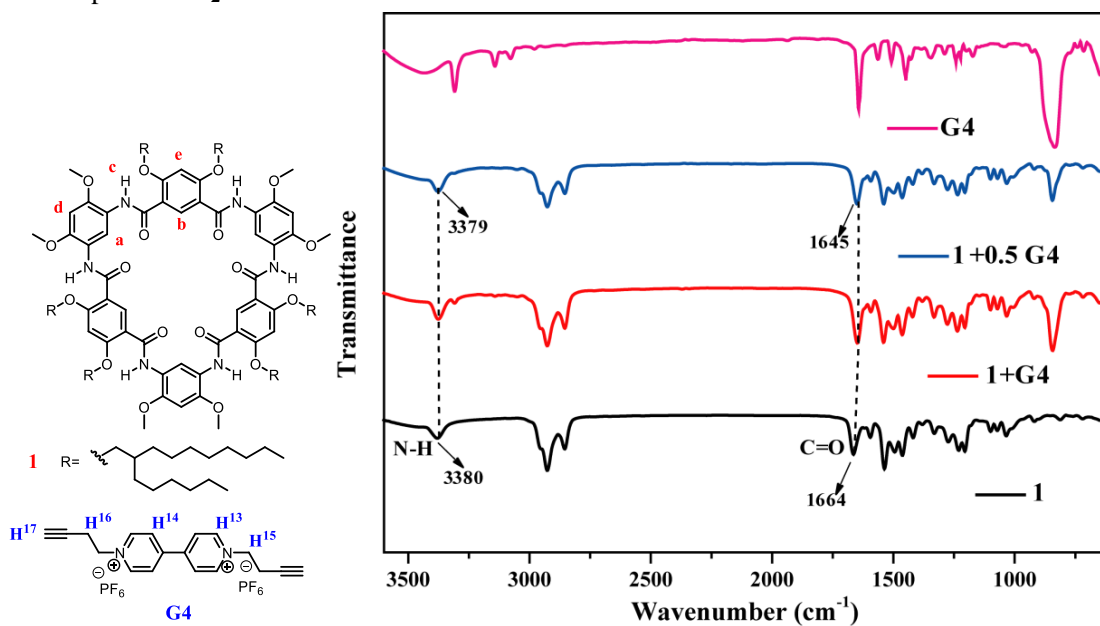

Figure S113 FT-IR spectra of **1** in the different equivalent of **G4**

Table S1 The infrared wave numbers of (C=O) shifts  $\nu$  (cm<sup>-1</sup>) on cyclo[6]aramides **1** for the 2:1 or 1:1 solution of the complexes **1**  $\supset$  **G** in solid state

| Complexes                    | $\nu_{free}$ of <b>1</b> (cm <sup>-1</sup> ) | $\nu_{complex}$ (cm <sup>-1</sup> ) | $\Delta\nu = \nu_{complex} - \nu_{free}$ |
|------------------------------|----------------------------------------------|-------------------------------------|------------------------------------------|
| <b>1</b> $\supset$ <b>G1</b> | 1664                                         | 1650                                | 14                                       |
| <b>1</b> $\supset$ <b>G2</b> | 1664                                         | 1652                                | 12                                       |
| <b>1</b> $\supset$ <b>G3</b> | 1664                                         | 1654                                | 10                                       |
| <b>1</b> $\supset$ <b>G4</b> | 1664                                         | 1645                                | 19                                       |

## 5. Optimization for Synthesis of Rotaxanes

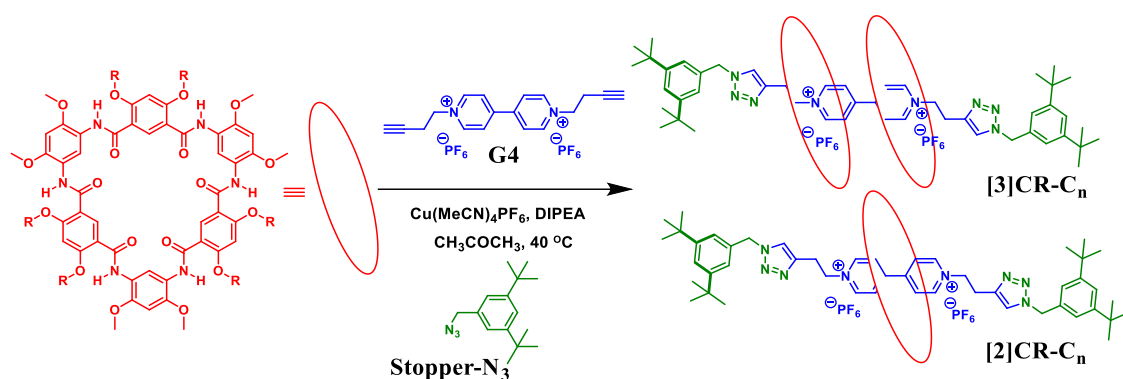

**Table S2 “Click-capping” approach for the synthesis of [3]rotaxanes or [2]rotaxanes**

| Entry          | Macrocycle | Conditions                                                                                     | Product Isolated yield (%) <sup>c</sup> |                    |
|----------------|------------|------------------------------------------------------------------------------------------------|-----------------------------------------|--------------------|
|                |            |                                                                                                | [3]Rotaxanes                            | [2]Rotaxanes       |
| 1 <sup>a</sup> | <b>1</b>   | CH <sub>3</sub> COCH <sub>3</sub> , 40 °C, 24 h                                                | 86                                      | n.d.               |
| 2 <sup>a</sup> | <b>2</b>   | CH <sub>3</sub> COCH <sub>3</sub> , 40 °C, 24 h                                                | <b>91</b>                               | n.d.               |
| 3 <sup>a</sup> | <b>3</b>   | CH <sub>3</sub> COCH <sub>3</sub> , 40 °C, 24 h                                                | 64                                      | Trace <sup>d</sup> |
| 4              | <b>1</b>   | CH <sub>3</sub> COCH <sub>3</sub> / CH <sub>3</sub> CN =<br>1:1(V/V), 40 °C, 24 h <sup>a</sup> | 60                                      | 18                 |
| 5 <sup>b</sup> | <b>1</b>   | CH <sub>3</sub> COCH <sub>3</sub> , 40 °C, 24 h                                                | 36                                      | <b>34</b>          |
| 6              | <b>1</b>   | CH <sub>3</sub> COCH <sub>3</sub> / CHCl <sub>3</sub> =<br>1:1(V/V), 40 °C, 48 h <sup>a</sup>  | 79                                      | n.d.               |

<sup>a</sup> 2.0 equiv. of macrocycle, 2.5 equiv. of Stopper-N<sub>3</sub>, 1.0 equiv. of G4, 1.2 equiv. of iPr<sub>2</sub>EtN and 0.3 equiv. CuPF<sub>6</sub>(MeCN)<sub>4</sub>. <sup>b</sup> 1.0 equiv. of macrocycle was used. <sup>c</sup> Isolated yield of pure material after chromatography. <sup>d</sup> Observed by MALDI-TOF-MS.

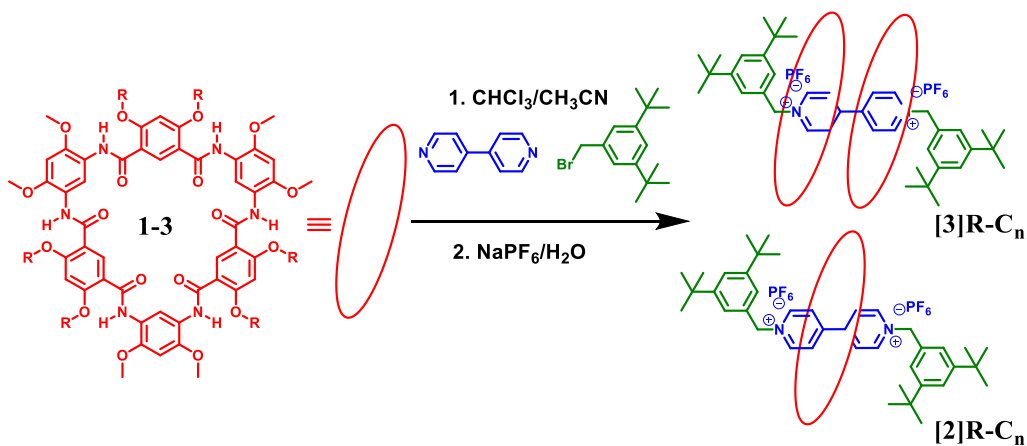

**Table S3 “Facile one-pot” approach for the synthesis of [3]rotaxanes or [2]rotaxanes**

| Entry | Macrocycle | Conditions <sup>a</sup>                                          | Product Isolated yield (%) <sup>b</sup> |              |
|-------|------------|------------------------------------------------------------------|-----------------------------------------|--------------|
|       |            |                                                                  | [3]Rotaxane                             | [2]Rotaxanes |
| 1     | <b>1</b>   | CH <sub>3</sub> CN / CHCl <sub>3</sub> = 1:1(V/V),<br>40°C, 48 h | 85                                      | n.d.         |
| 2     | <b>2</b>   | CH <sub>3</sub> CN / CHCl <sub>3</sub> = 1:1(V/V),<br>40°C, 48 h | 85                                      | n.d.         |
| 3     | <b>3</b>   | CH <sub>3</sub> CN / CHCl <sub>3</sub> = 1:1(V/V),<br>40°C, 48 h | n.d.                                    | 71           |
| 4     | <b>1</b>   | CHCl <sub>3</sub> , 40°C, 7 days                                 | 77                                      | Not observed |

<sup>a</sup> 2.0 equiv. of macrocycle, 2.5 equiv. of **Stopper-Br**, 1.0 equiv. of **4,4'-Bipyridine**. <sup>b</sup> Isolated yield over two steps of pure material after chromatography.

## 6. Stacked NMR Spectra of Rotaxanes

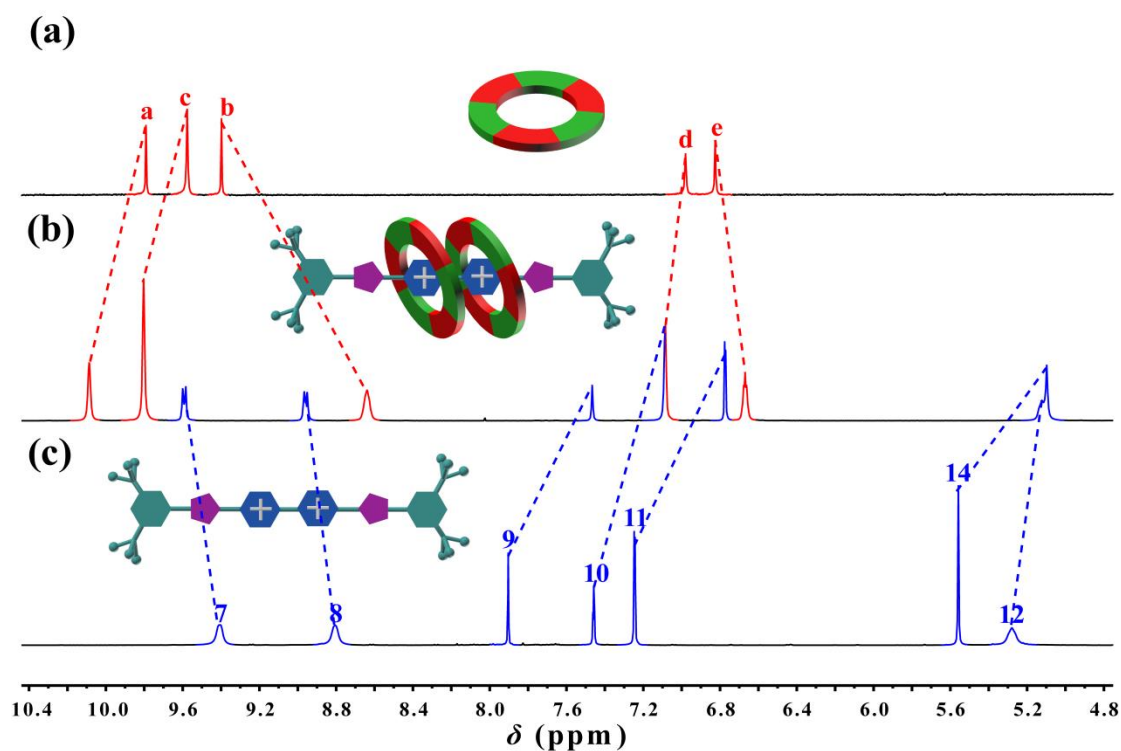

**Figure S114** Partial <sup>1</sup>H NMR spectrum of (a) **1**, (b) **[3]CR-C<sub>16</sub>** and (c) **Alxe-1** (400 MHz, CD<sub>3</sub>COCD<sub>3</sub>, 298 K). The assignments correspond to the lettering shown in main text.

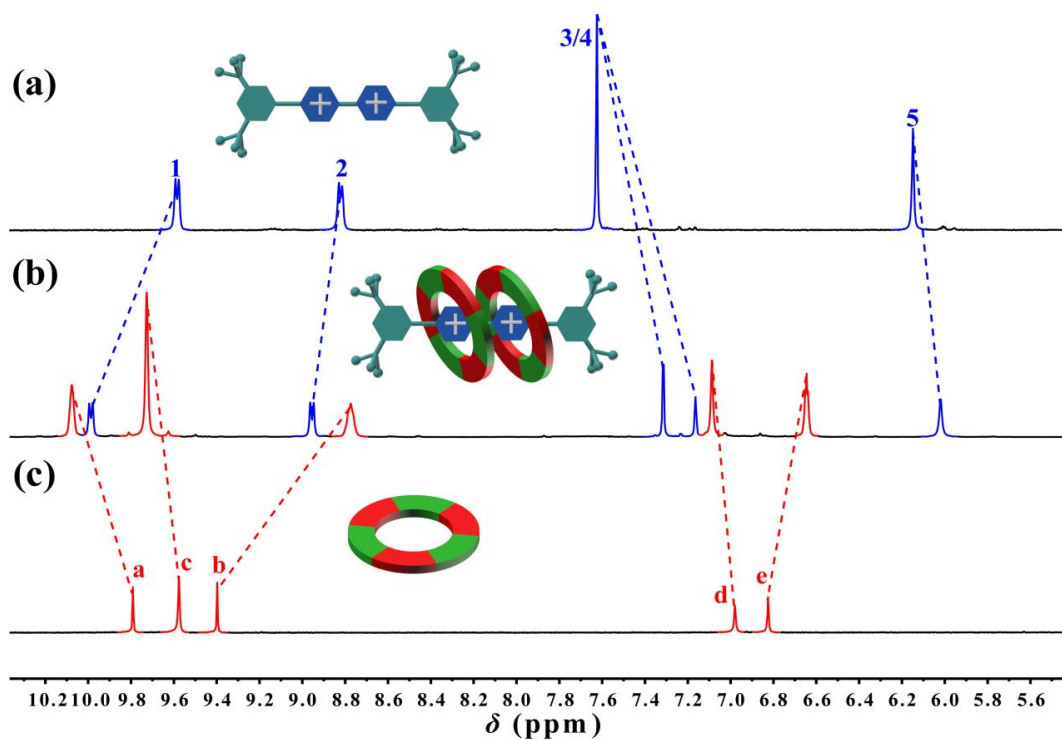

**Figure S115** Partial  $^1\text{H}$  NMR spectrum of (a) Alxe-2, (b)  $[3]\text{R-C}_{16}$  and (c) **1** (400 MHz,  $\text{CD}_3\text{COCD}_3$ , 298 K). The assignments correspond to the lettering shown in main text.

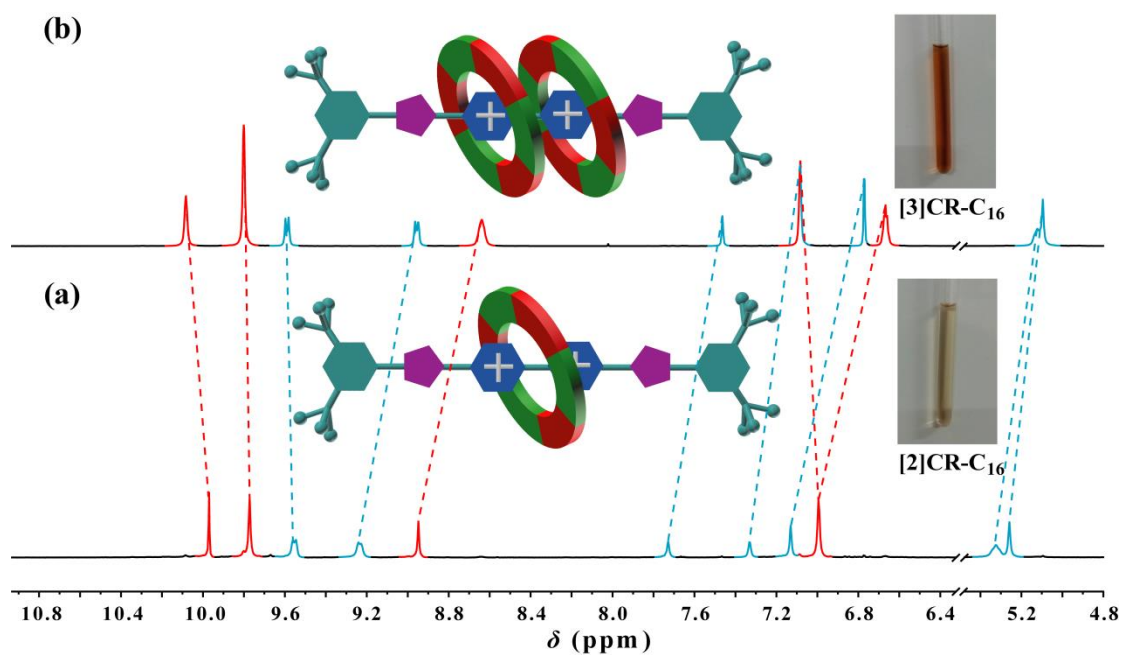

**Figure S116** Partial  $^1\text{H}$  NMR spectra and image of solutions of (a)  $[2]$ rotaxane  $[2]\text{CR-C}_{16}$  and (b)  $[3]$ rotaxane  $[3]\text{CR-C}_{16}$  (400 MHz,  $\text{CD}_3\text{COCD}_3$ , 298 K).



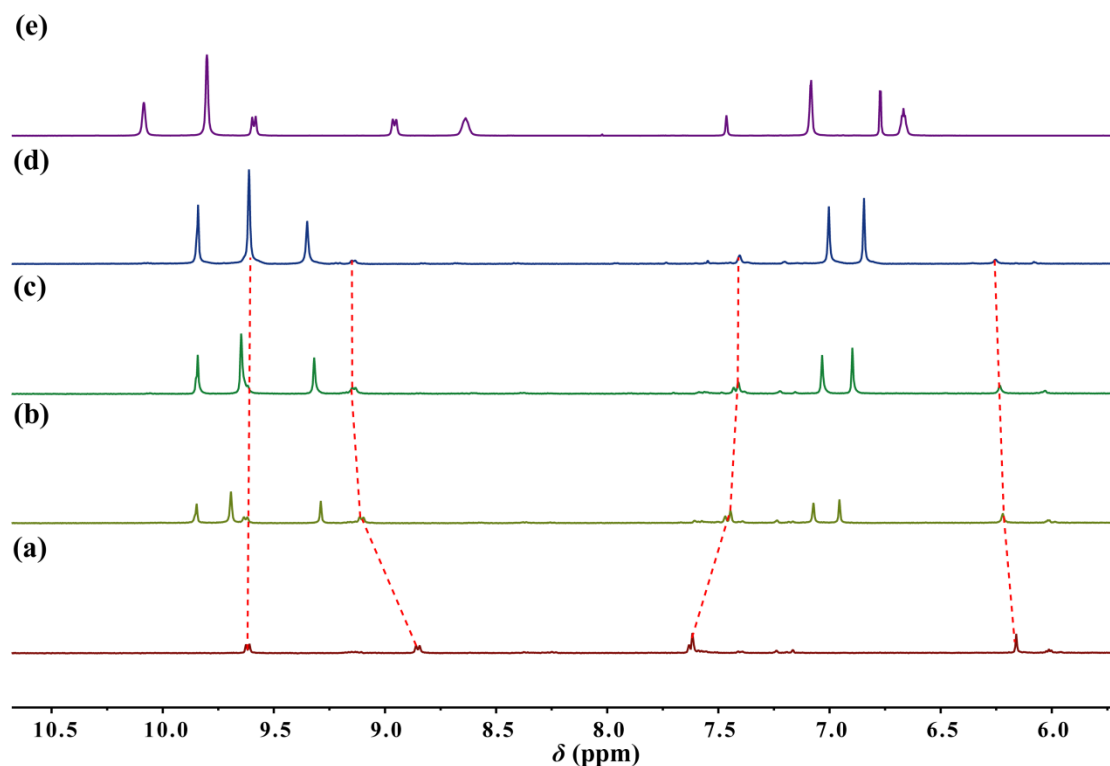

**Figure S117** Partial  $^1\text{H}$  NMR spectra of (a) 1.0 mM **Axle-1**, (b) 1.0 mM **Axle-1** and 2.0 mM macrocycle **1**, (c) 1.0 mM **Axle-1** and 4.0 mM macrocycle **1**, (d) 1.0 mM **Axle-1** and 6.0 mM macrocycle **1** after reflux in  $\text{CD}_3\text{COCD}_3/\text{DMSO-d}_6$ , v/v=9:1 for 3 hours, (e) 2.0 mM [3]rotaxane [3]CR-C<sub>16</sub> (400 MHz,  $\text{CD}_3\text{COCD}_3/\text{DMSO-d}_6$ , v/v=9:1, 298 K).

## 6.1 2D NOESY, HSQC and HMBC Spectra of Rotaxanes

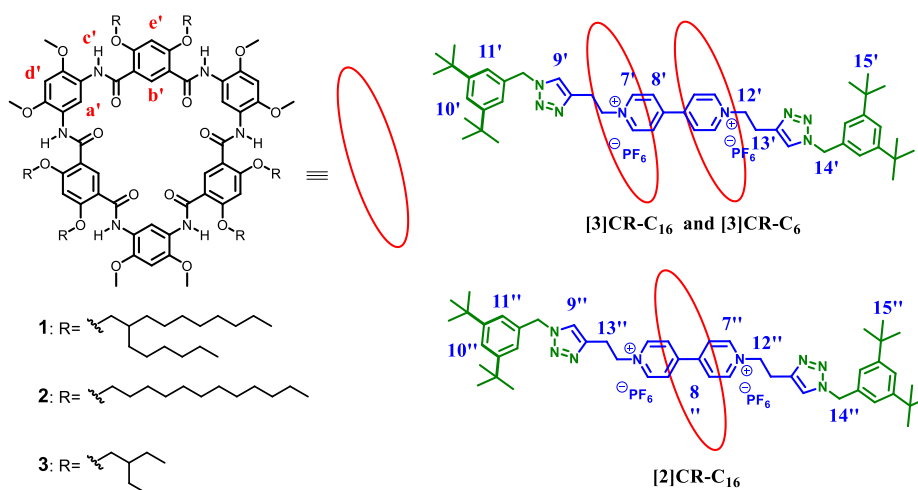

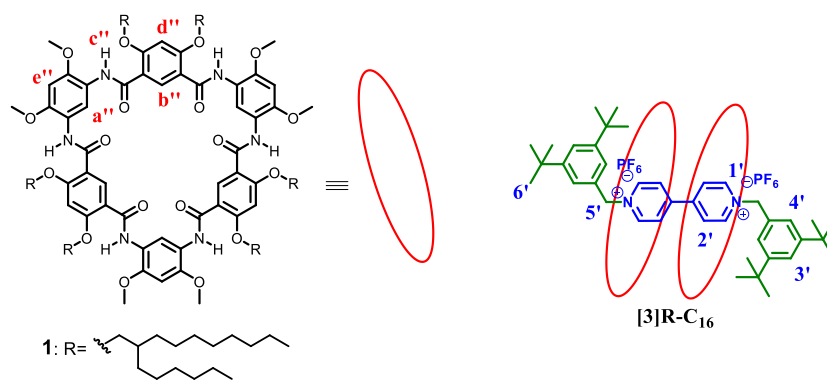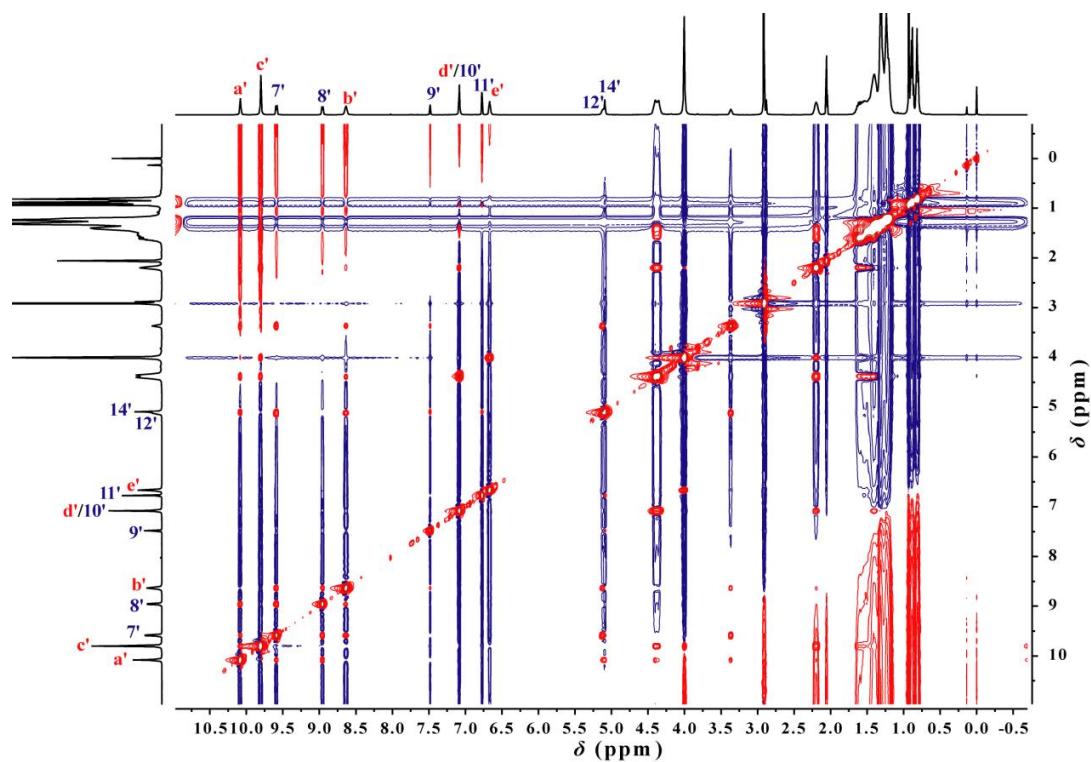

Figure S118 <sup>1</sup>H-<sup>1</sup>H NOESY spectrum of [3]CR-C<sub>16</sub> (CD<sub>3</sub>COCD<sub>3</sub>, 400 MHz, 298K).

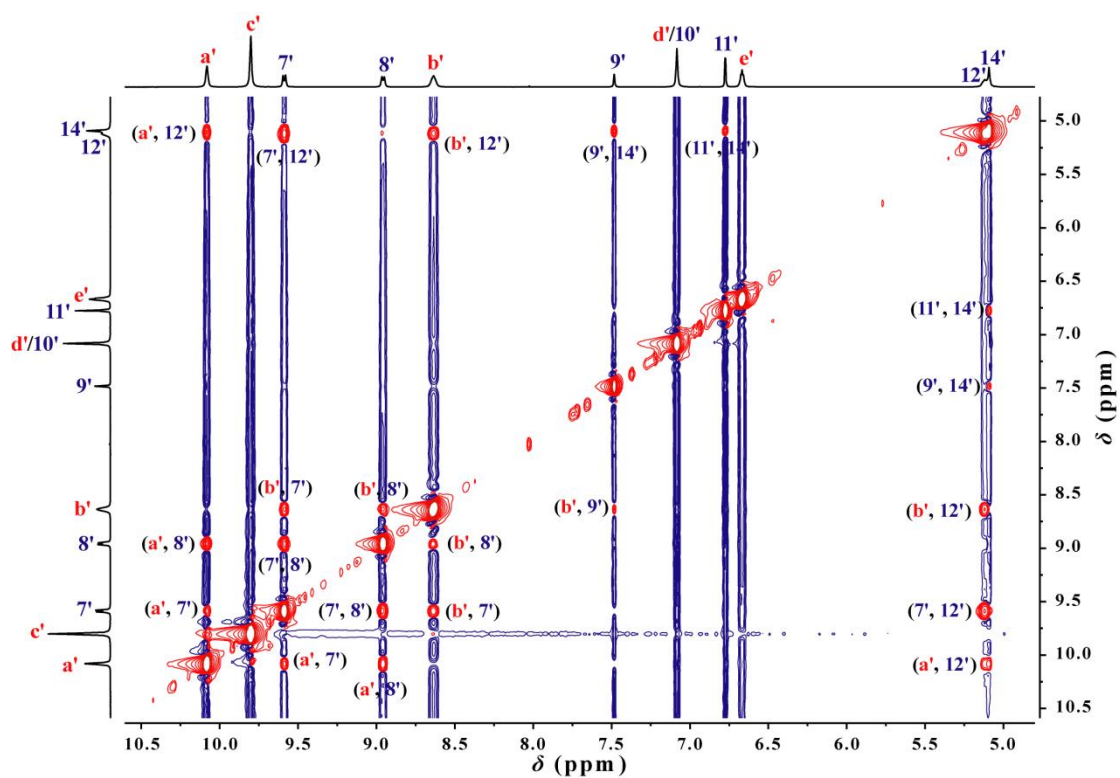

**Figure S119** Expanded  $^1\text{H}$ - $^1\text{H}$  NOESY spectrum of [3]CR-C<sub>16</sub> (CD<sub>3</sub>COCD<sub>3</sub>, 400 MHz, 298K).

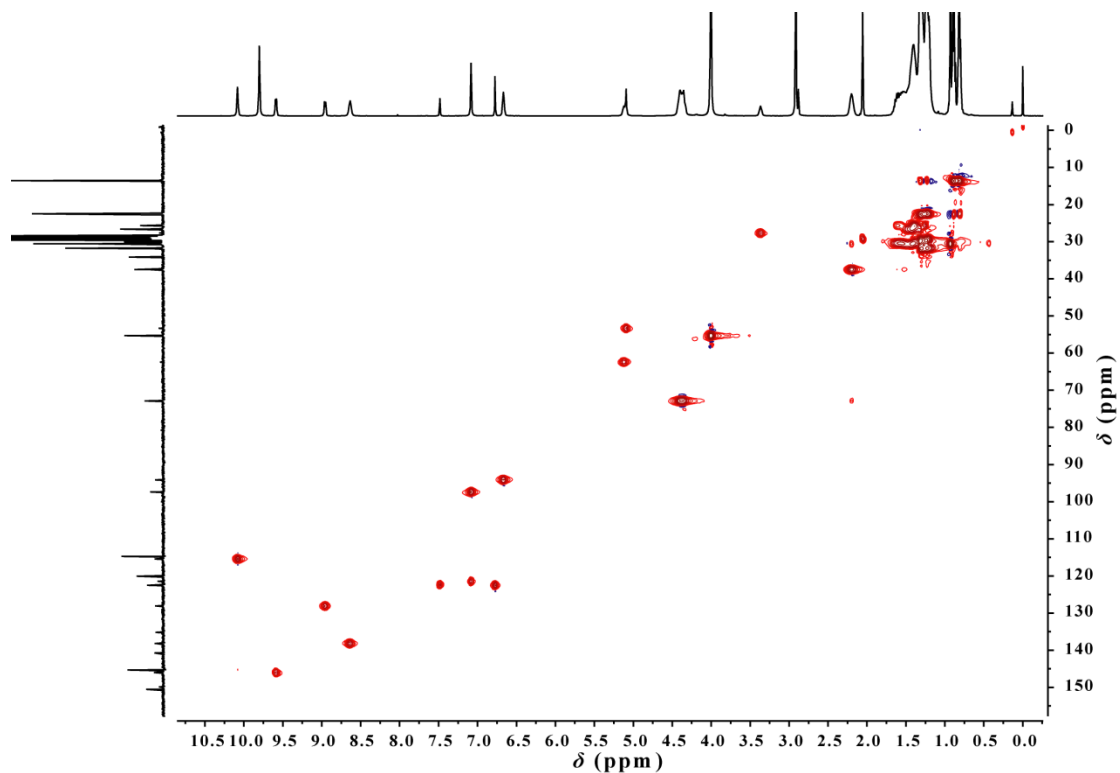

**Figure S120** Expanded  $^1\text{H}$ - $^{13}\text{C}$  HSQC spectrum of [3]CR-C<sub>16</sub> (CD<sub>3</sub>COCD<sub>3</sub>, 400 MHz, 298K).

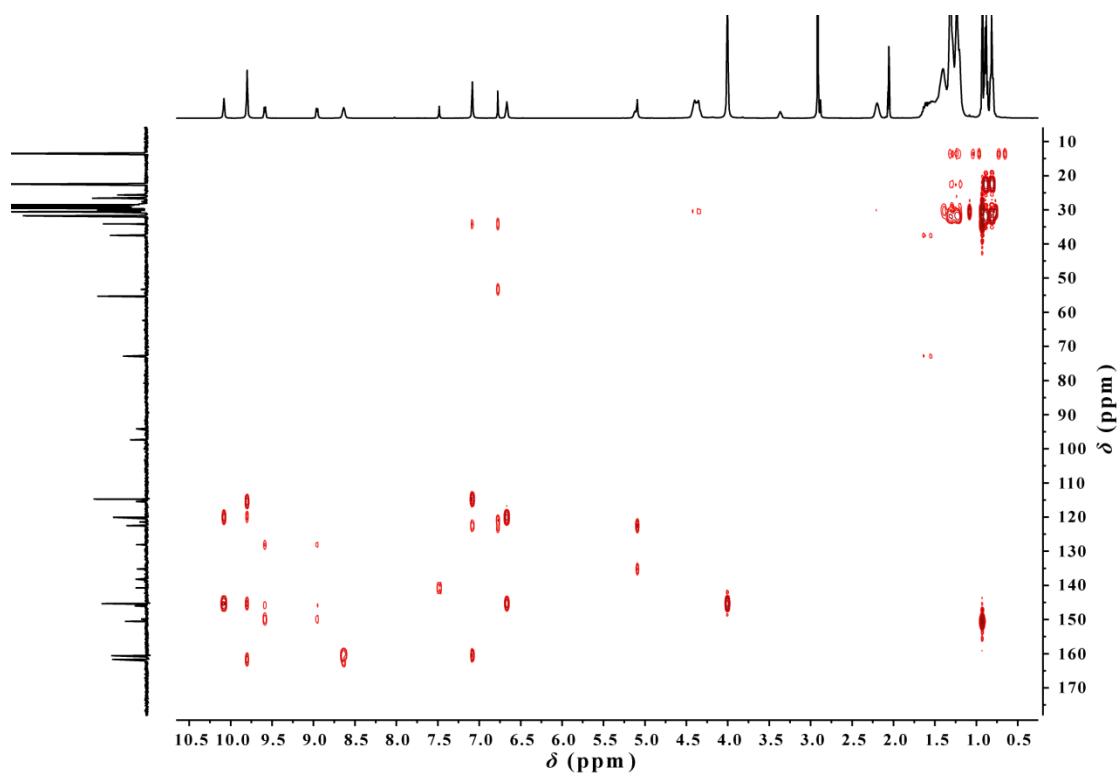

Figure S121  $^1\text{H}$ - $^{13}\text{C}$  HMBC spectrum of [3]CR-C<sub>16</sub> (CD<sub>3</sub>COCD<sub>3</sub>, 400 MHz, 298K).

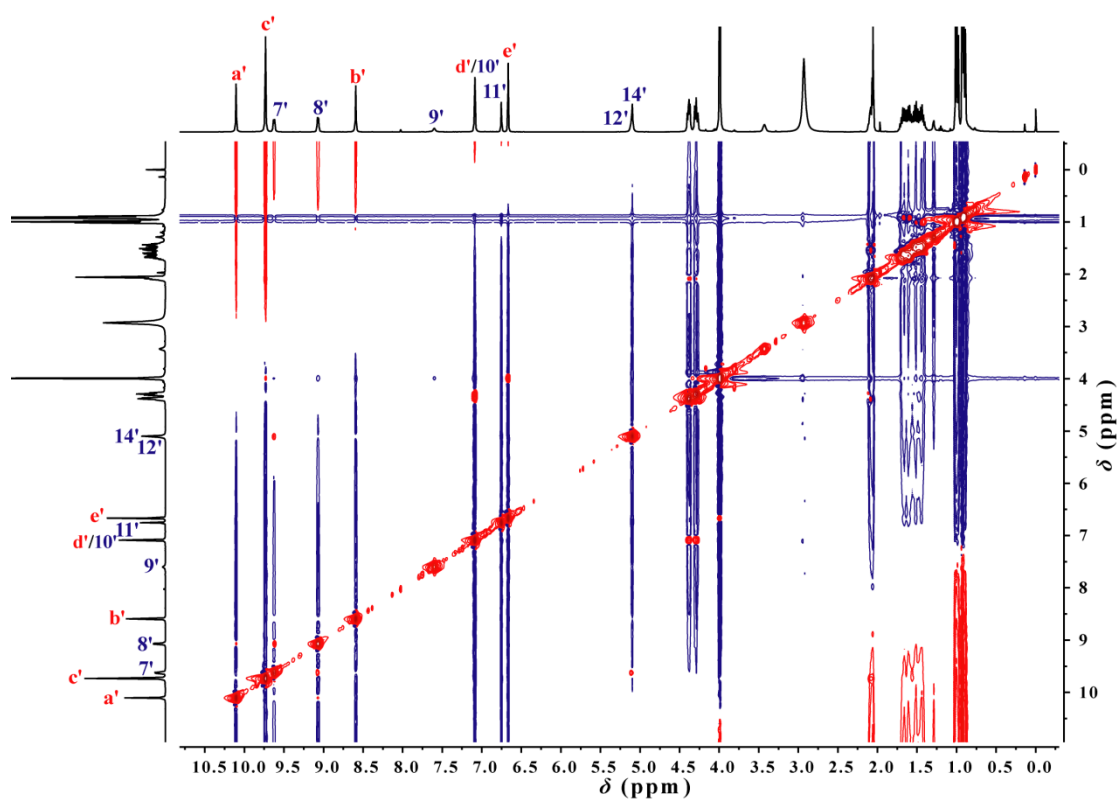

Figure S122  $^1\text{H}$ - $^1\text{H}$  NOESY spectrum of [3]CR-C<sub>6</sub> (CD<sub>3</sub>COCD<sub>3</sub>, 400 MHz, 298K).

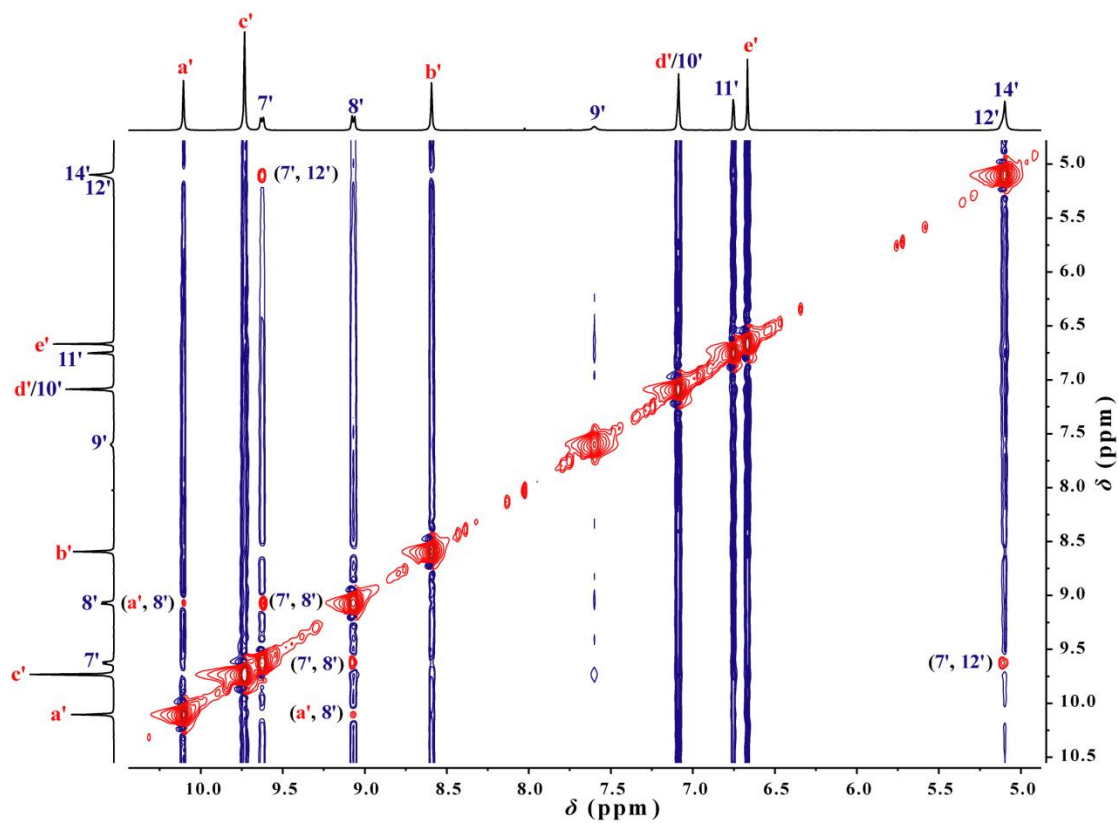

Figure S123 Expanded  $^1\text{H}$ - $^1\text{H}$  NOESY spectrum of [3]CR- $\text{C}_6$  ( $\text{CD}_3\text{COCD}_3$ , 400 MHz, 298K).

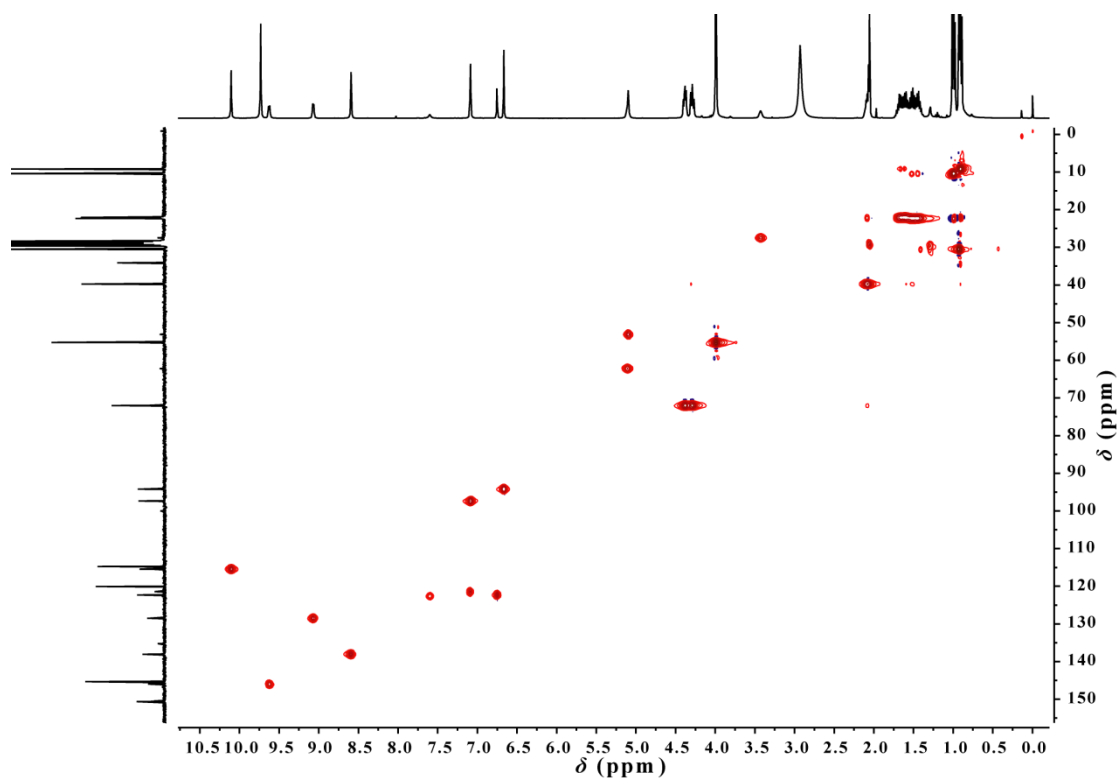

Figure S124 Expanded  $^1\text{H}$ - $^{13}\text{C}$  HSQC spectrum of [3]CR- $\text{C}_6$  ( $\text{CD}_3\text{COCD}_3$ , 400 MHz, 298K).

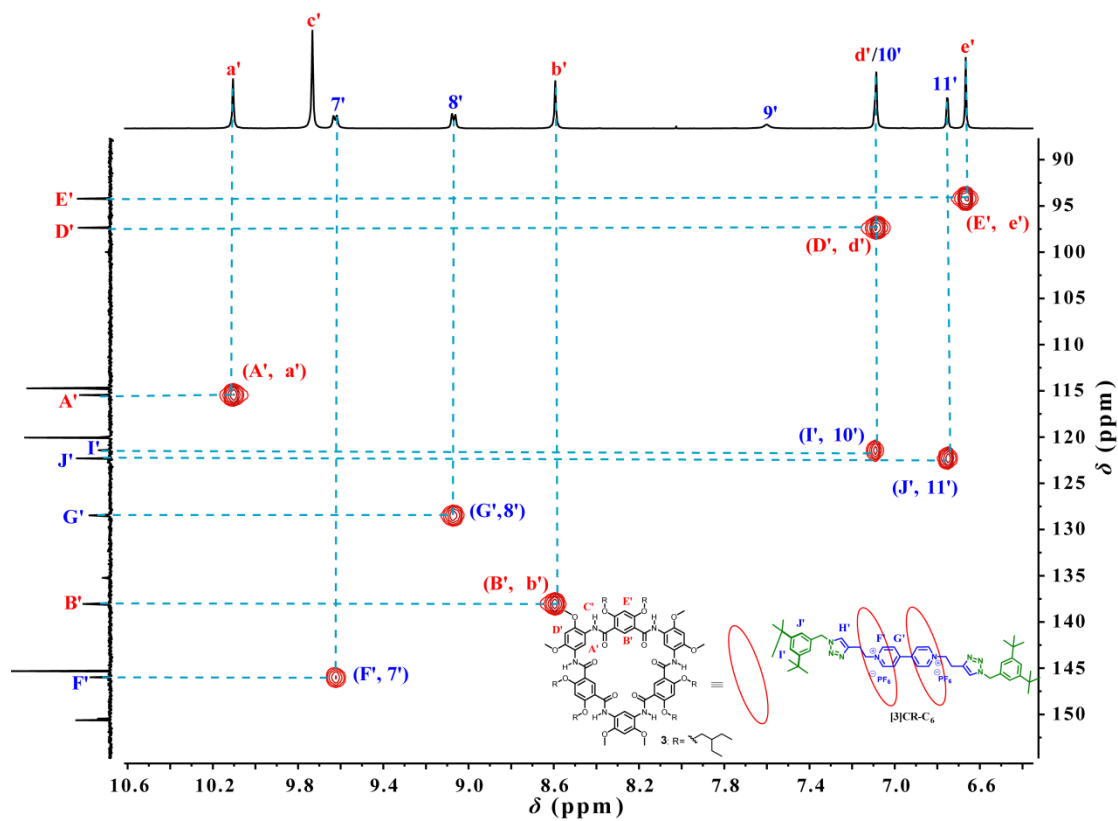

Figure S125 Expanded  $^1\text{H}$ - $^{13}\text{C}$  HSQC spectrum of [3]CR- $\text{C}_6$  ( $\text{CD}_3\text{COCD}_3$ , 400 MHz, 298K).

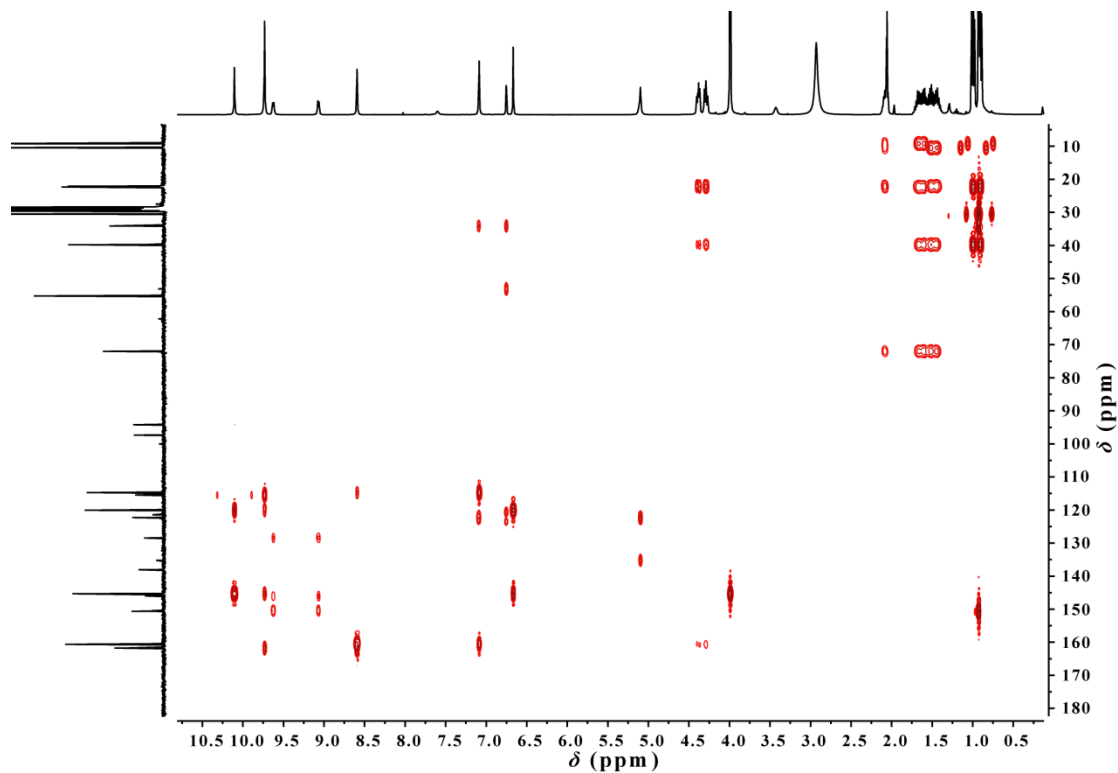

Figure S126  $^1\text{H}$ - $^{13}\text{C}$  HMBC spectrum of [3]CR- $\text{C}_6$  ( $\text{CD}_3\text{COCD}_3$ , 400 MHz, 298K).

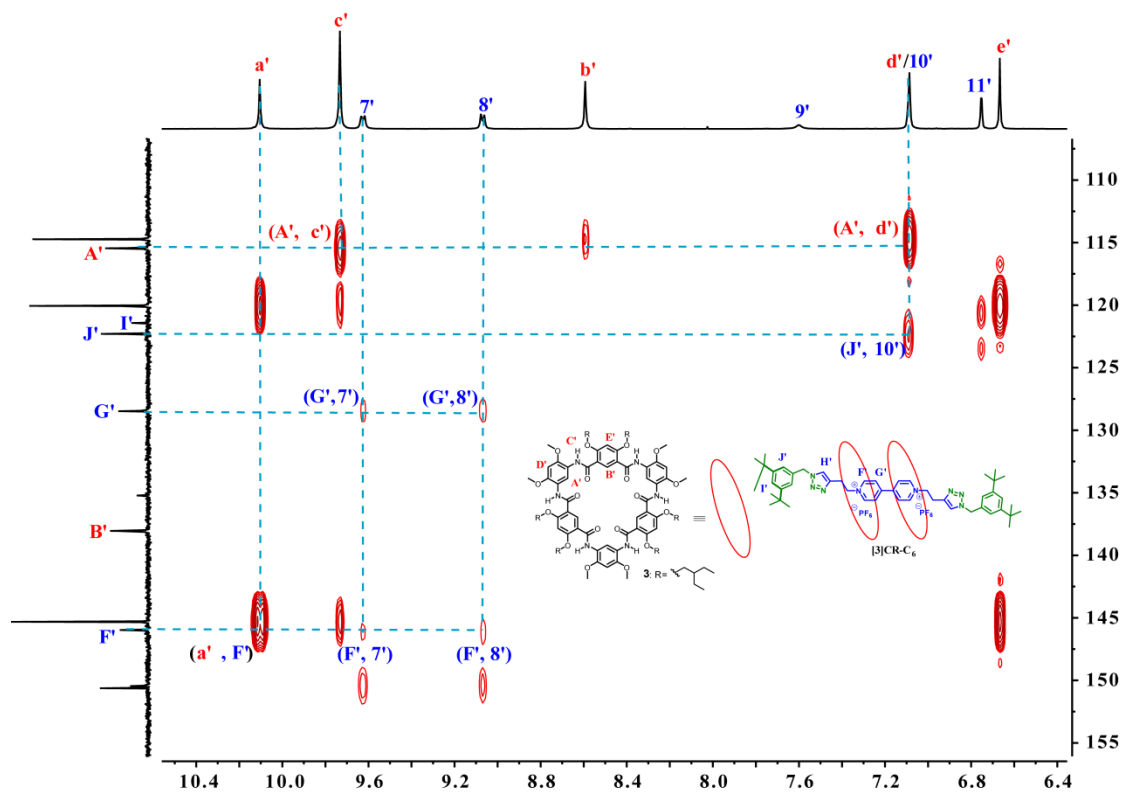

Figure S127 Expanded  $^1\text{H}$ - $^{13}\text{C}$  HMBC spectrum of  $[3]\text{CR-C}_6$  ( $\text{CD}_3\text{COCD}_3$ , 400 MHz, 298K).

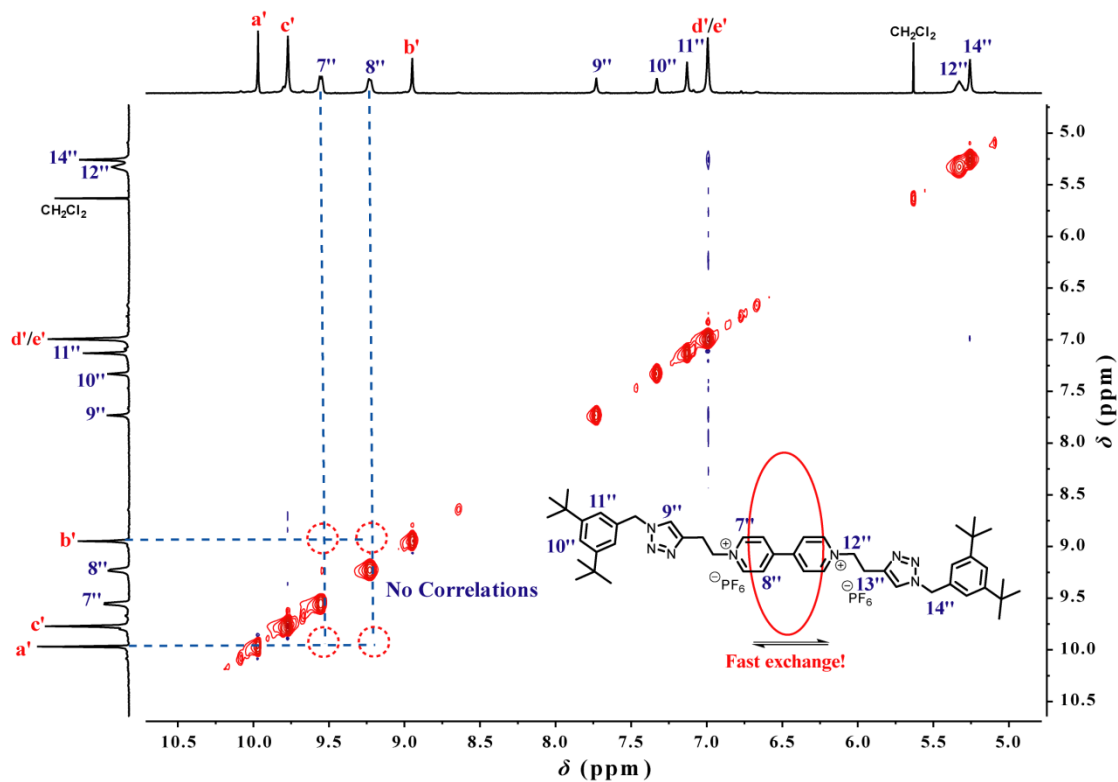

Figure S128 Expanded  $^1\text{H}$ - $^1\text{H}$  NOESY spectrum of  $[2]\text{CR-C}_{16}$  ( $\text{CD}_3\text{COCD}_3$ , 400 MHz, 298K).

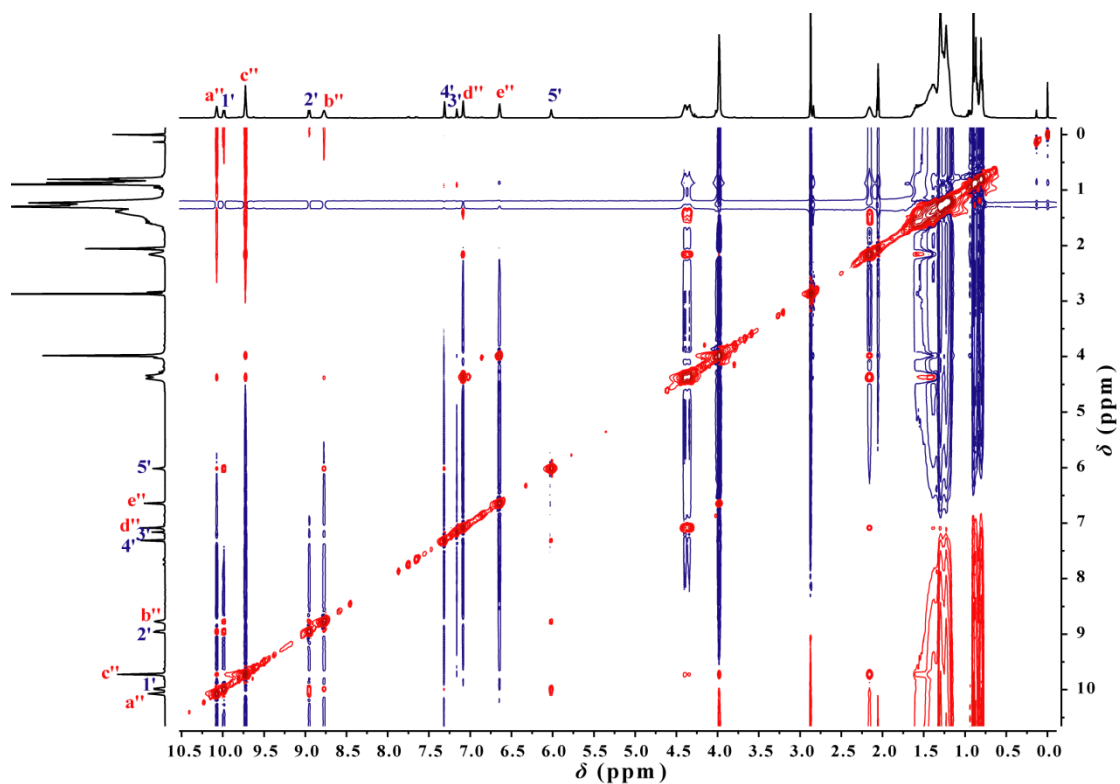

Figure S129  $^1\text{H}$ - $^1\text{H}$  NOESY spectrum of  $[3]\text{R-C}_{16}$  ( $\text{CD}_3\text{COCD}_3$ , 400 MHz, 298K).

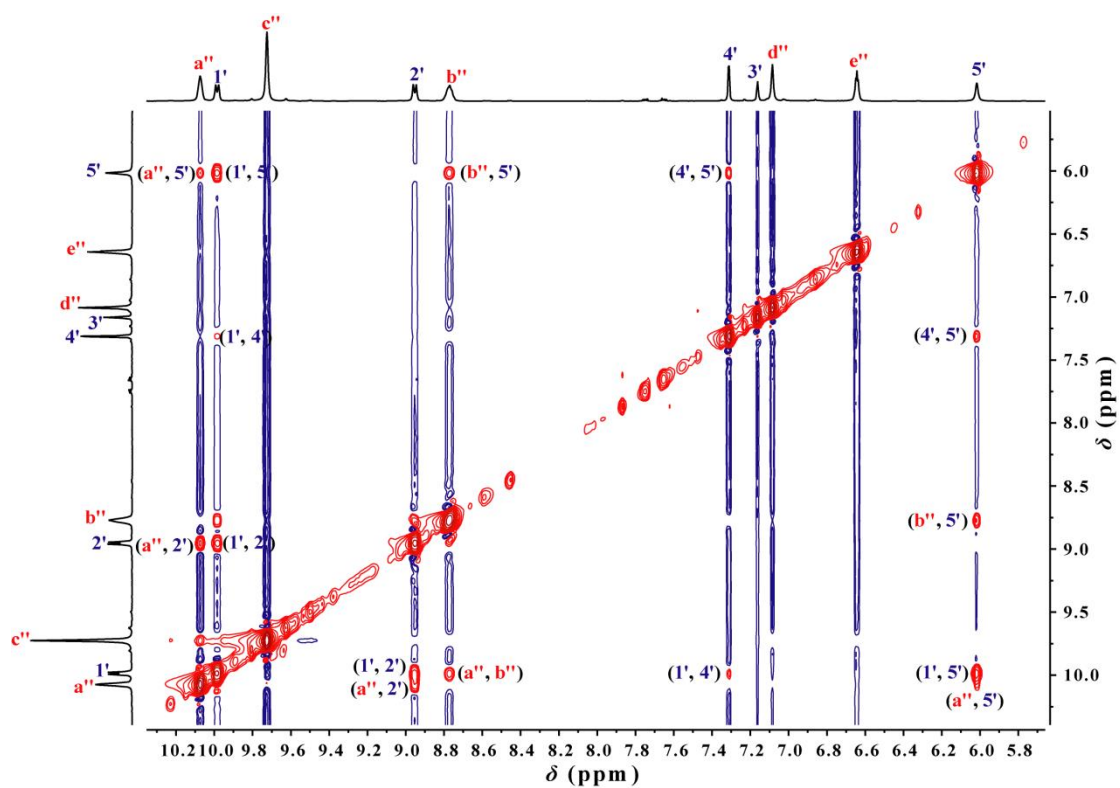

Figure S130 Expanded  $^1\text{H}$ - $^1\text{H}$  NOESY spectrum of  $[3]\text{R-C}_{16}$  ( $\text{CD}_3\text{COCD}_3$ , 400 MHz, 298K).



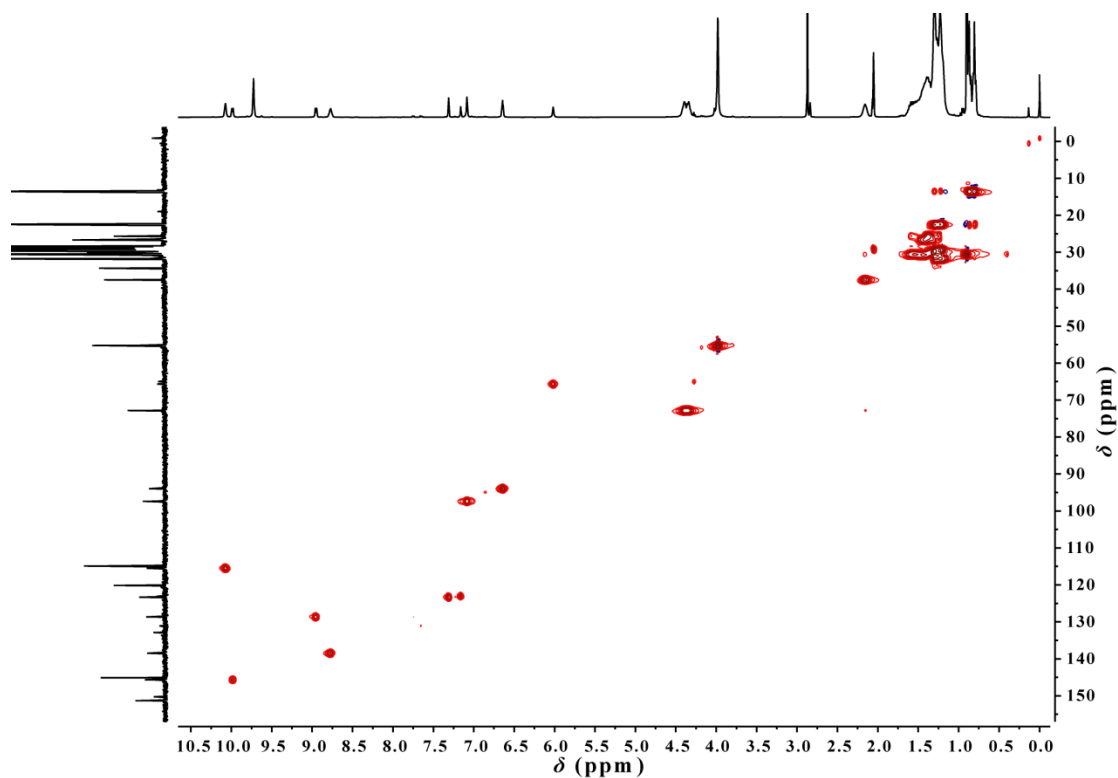

Figure S131 Expanded  $^1\text{H}$ - $^{13}\text{C}$  HSQC spectrum of [3]R-C<sub>16</sub> (CD<sub>3</sub>COCD<sub>3</sub>, 400 MHz, 298K).

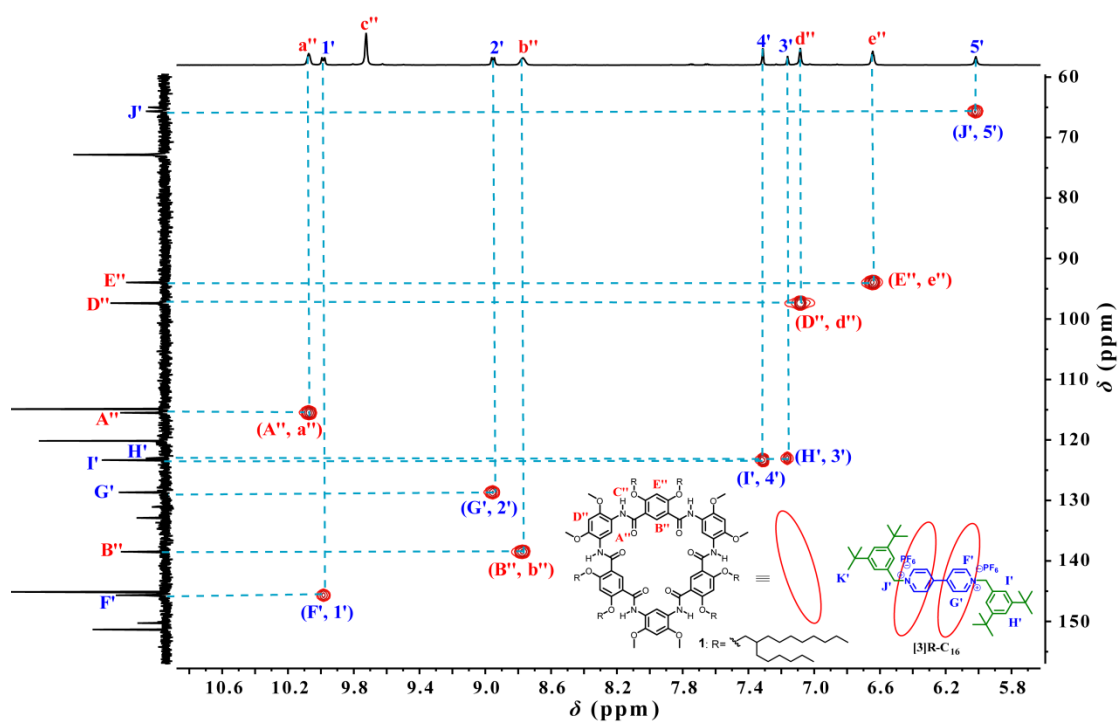

Figure S132 Expanded  $^1\text{H}$ - $^{13}\text{C}$  HSQC spectrum of [3]R-C<sub>16</sub> (CD<sub>3</sub>COCD<sub>3</sub>, 400 MHz, 298K).

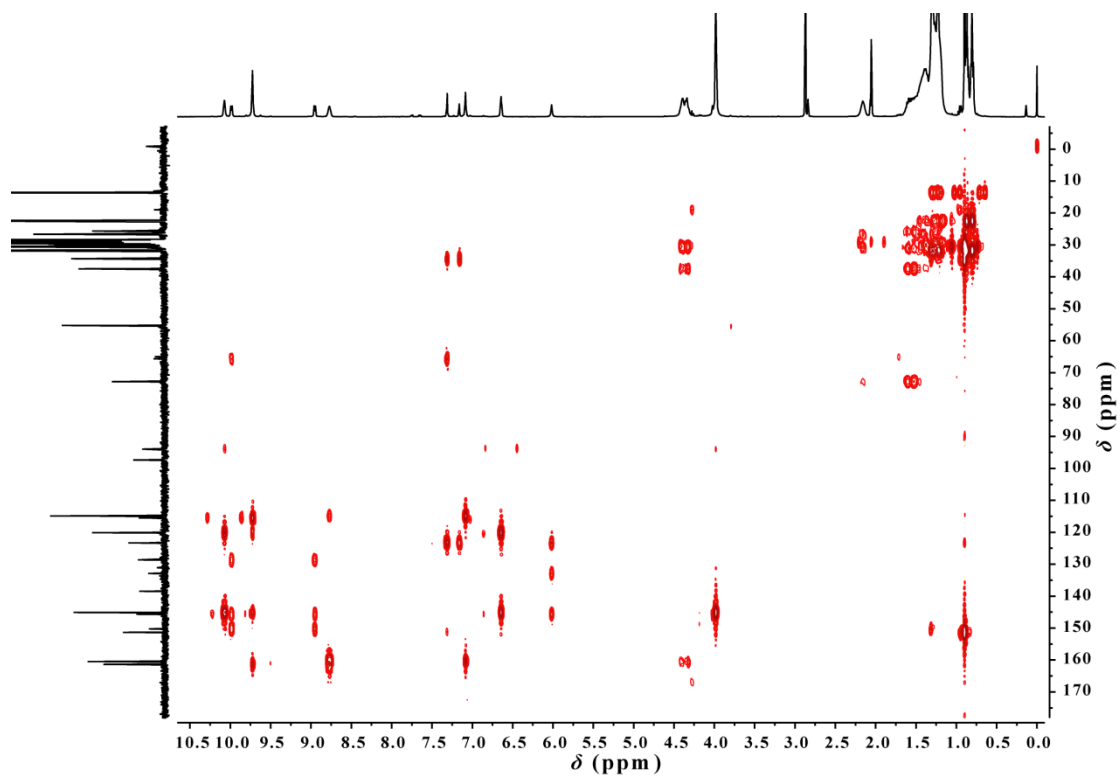

Figure S133  $^1\text{H}$ - $^{13}\text{C}$  HMBC spectrum of [3]R-C<sub>16</sub> (CD<sub>3</sub>COCD<sub>3</sub>, 400 MHz, 298K).

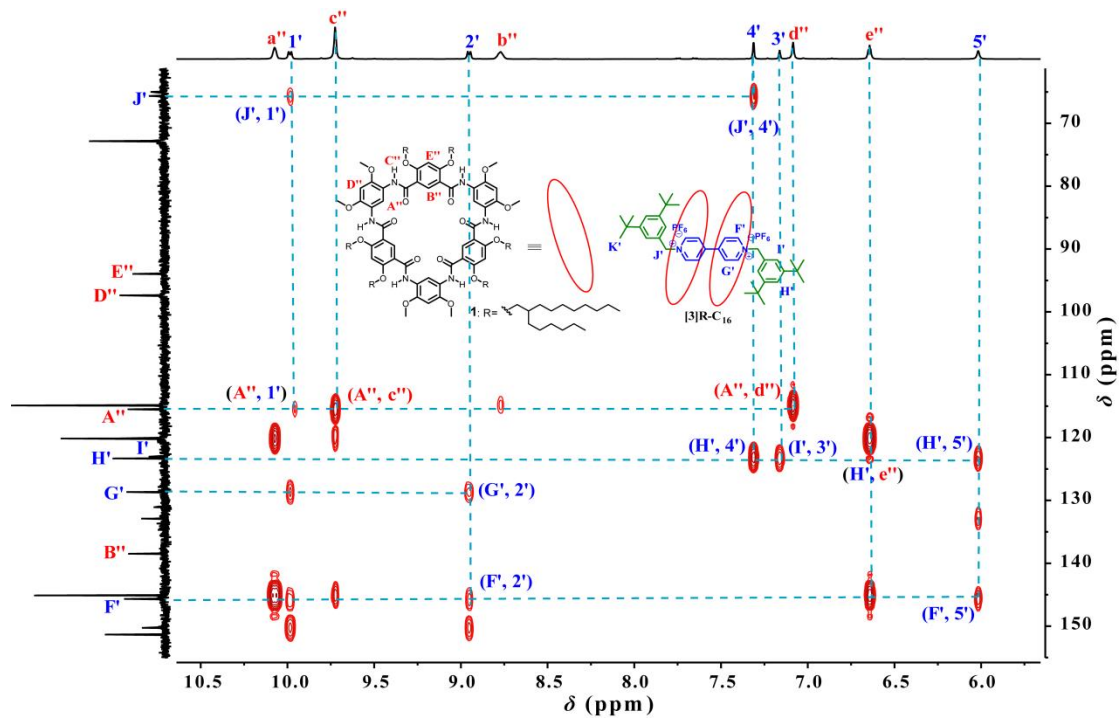

Figure S134 Expanded  $^1\text{H}$ - $^{13}\text{C}$  HMBC spectrum of [3]R-C<sub>16</sub> (CD<sub>3</sub>COCD<sub>3</sub>, 400 MHz, 298K).

## 6.2 2D DOSY Spectra of Rotaxanes

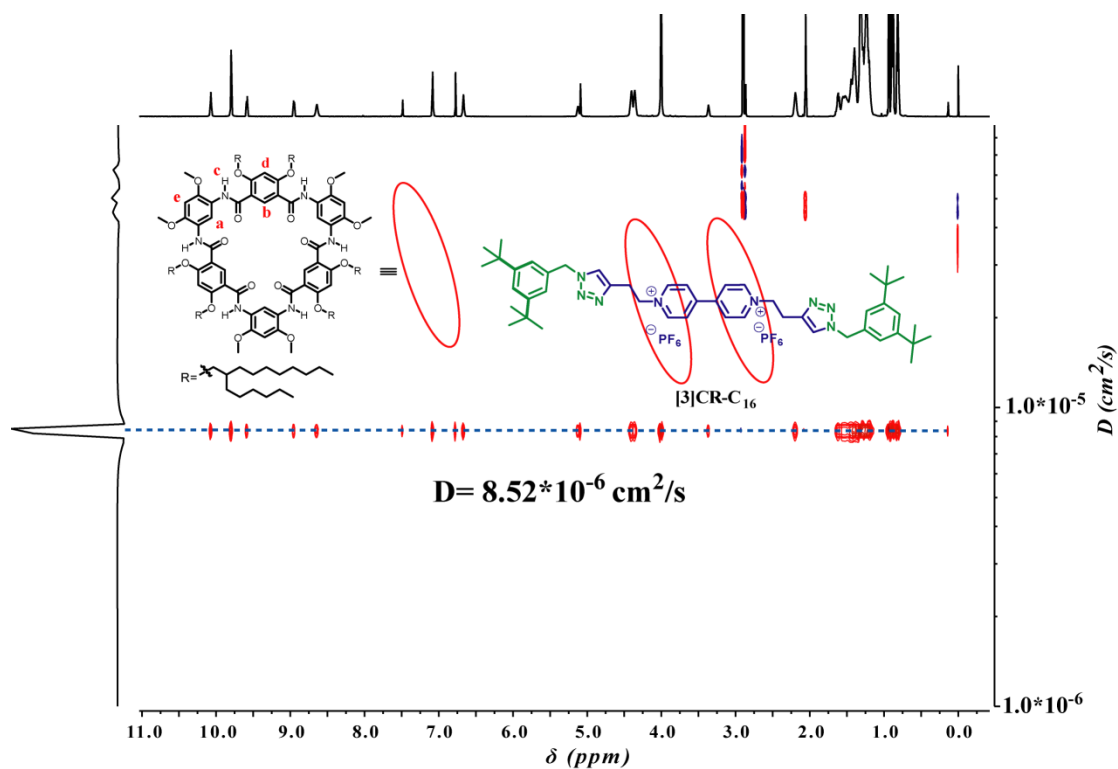

Figure S135 2D-DOSY NMR spectrum of [3]CR-C<sub>16</sub> (CD<sub>3</sub>COCD<sub>3</sub>, 600 MHz, 298K).

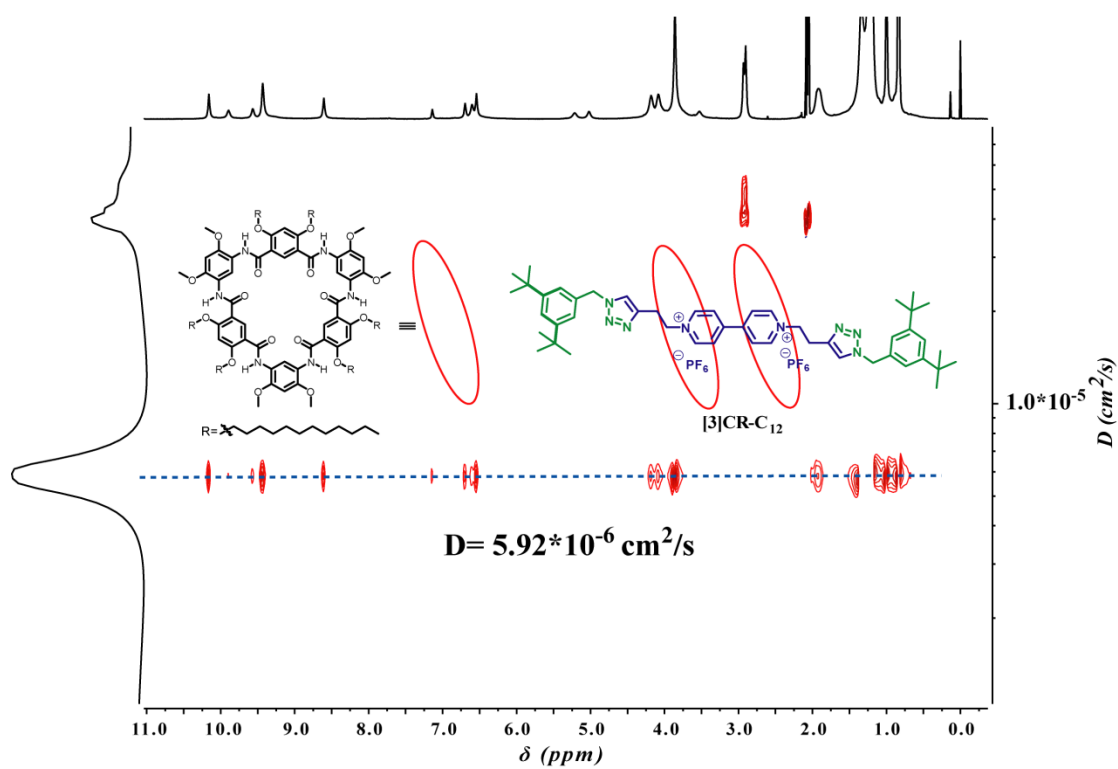

Figure S136 2D-DOSY NMR spectrum of [3]CR-C<sub>12</sub> (CD<sub>3</sub>COCD<sub>3</sub>, 600 MHz, 298K).

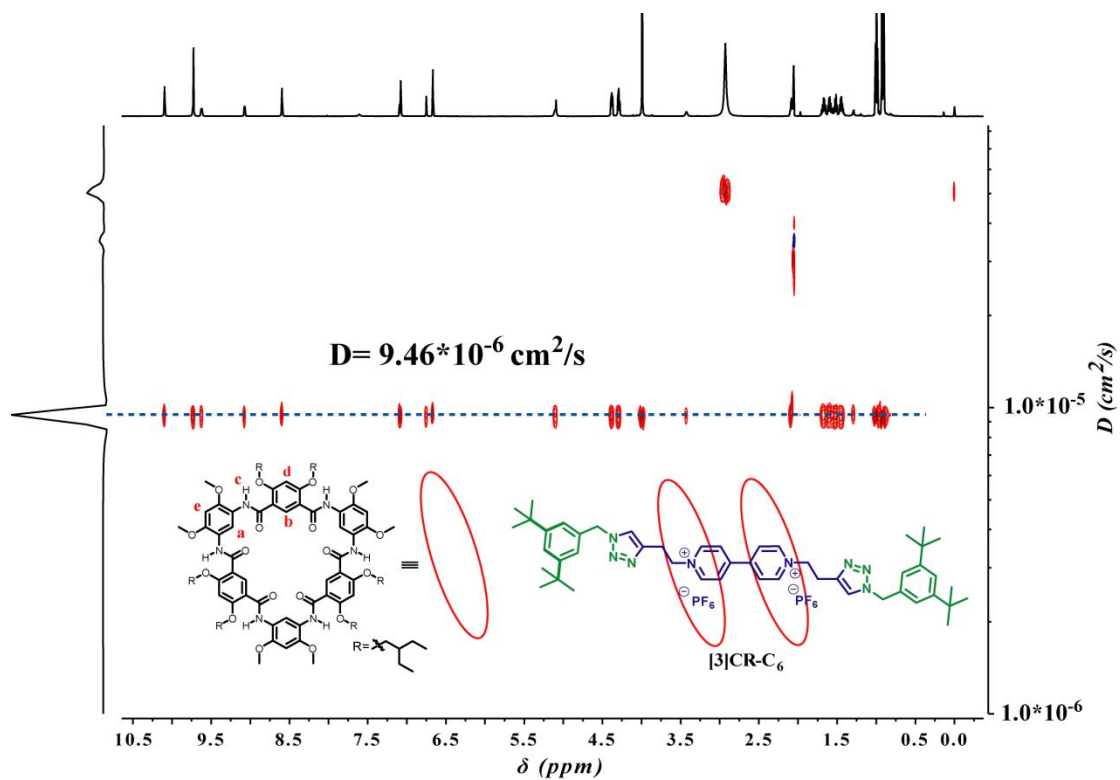

Figure S137 2D-DOSY NMR spectrum of **[3]CR-C<sub>6</sub>** (CD<sub>3</sub>COCD<sub>3</sub>, 600 MHz, 298K).

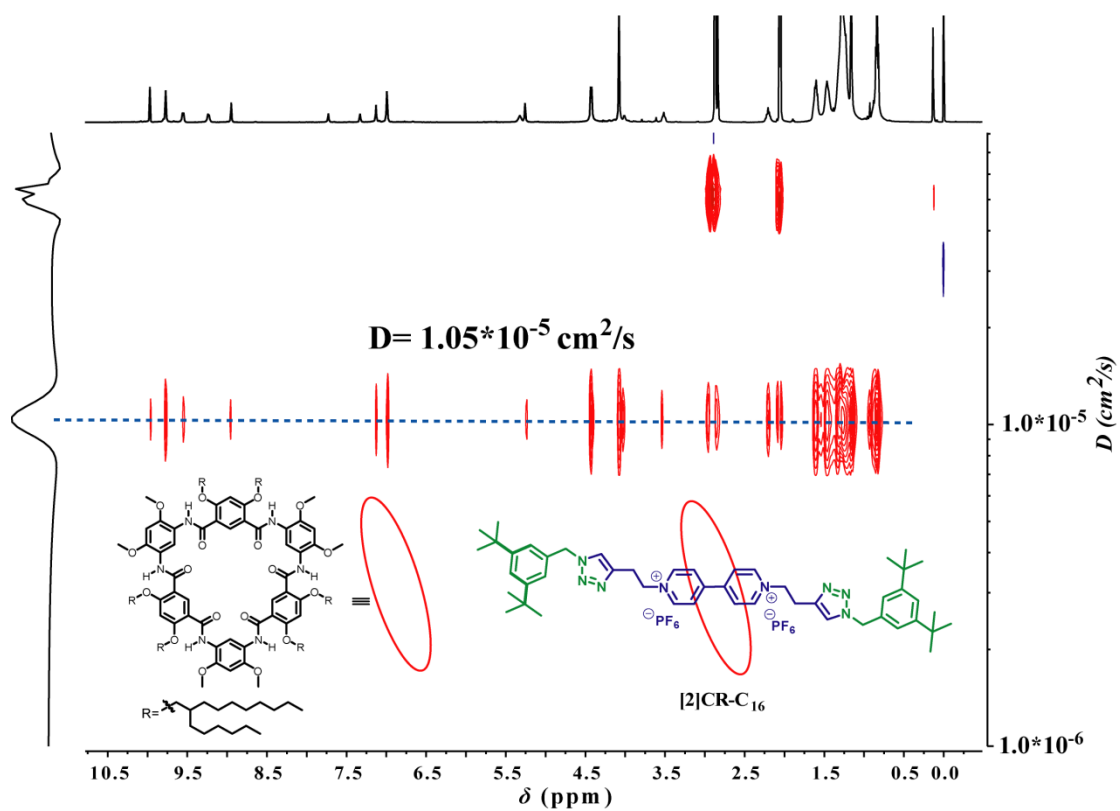

Figure S138 2D-DOSY NMR spectrum of **[2]CR-C<sub>16</sub>** (CD<sub>3</sub>COCD<sub>3</sub>, 600 MHz, 298K).

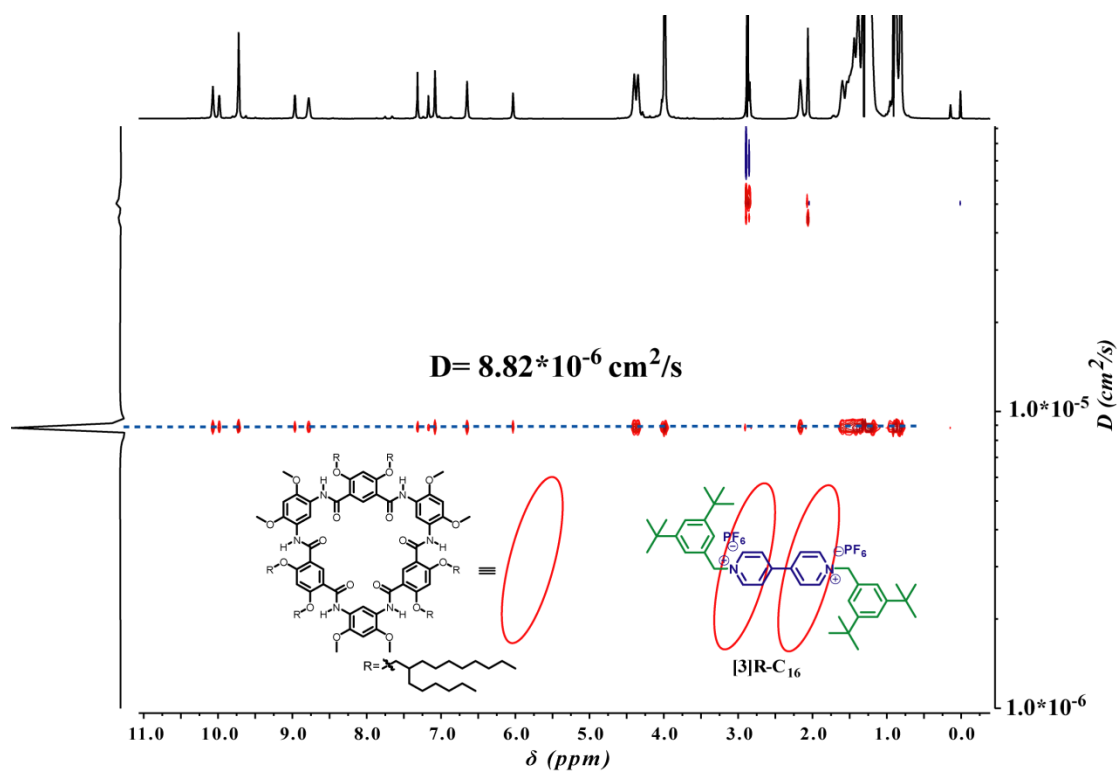

Figure S139 2D-DOSY NMR spectrum of  $[3]R-C_{16}$  ( $CD_3COCD_3$ , 600 MHz, 298K).

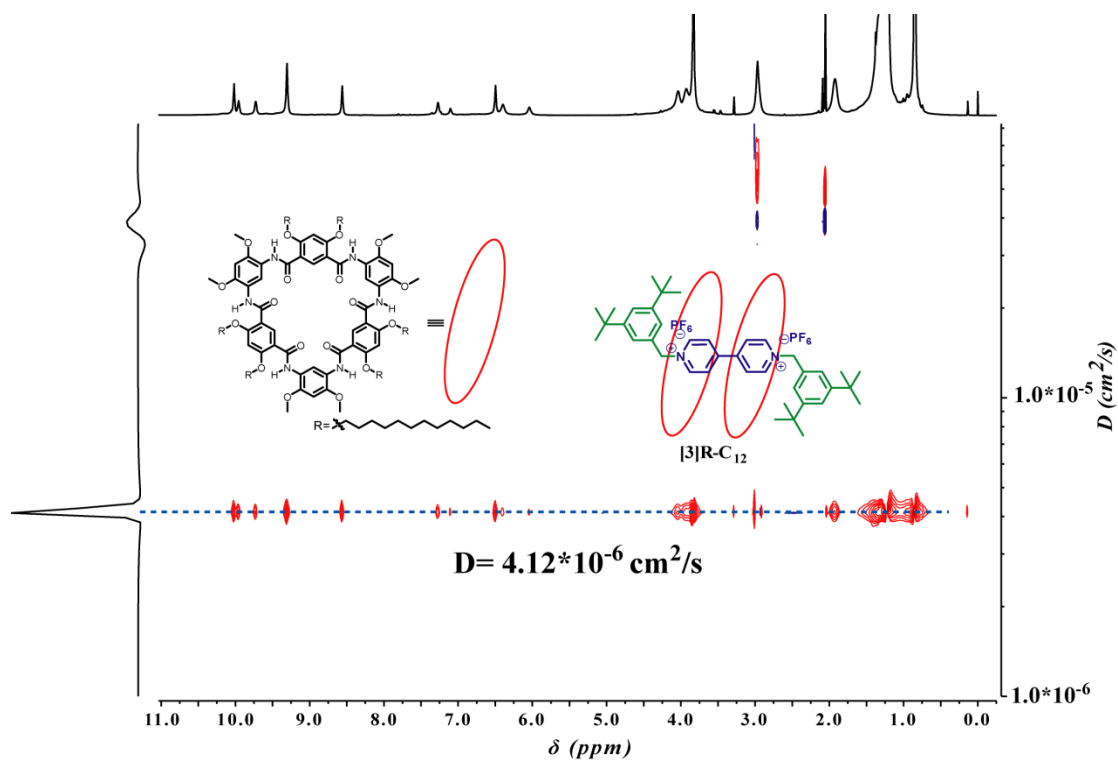

Figure S140 2D-DOSY NMR spectrum of  $[3]R-C_{12}$  ( $CD_3COCD_3$ , 600 MHz, 298K).

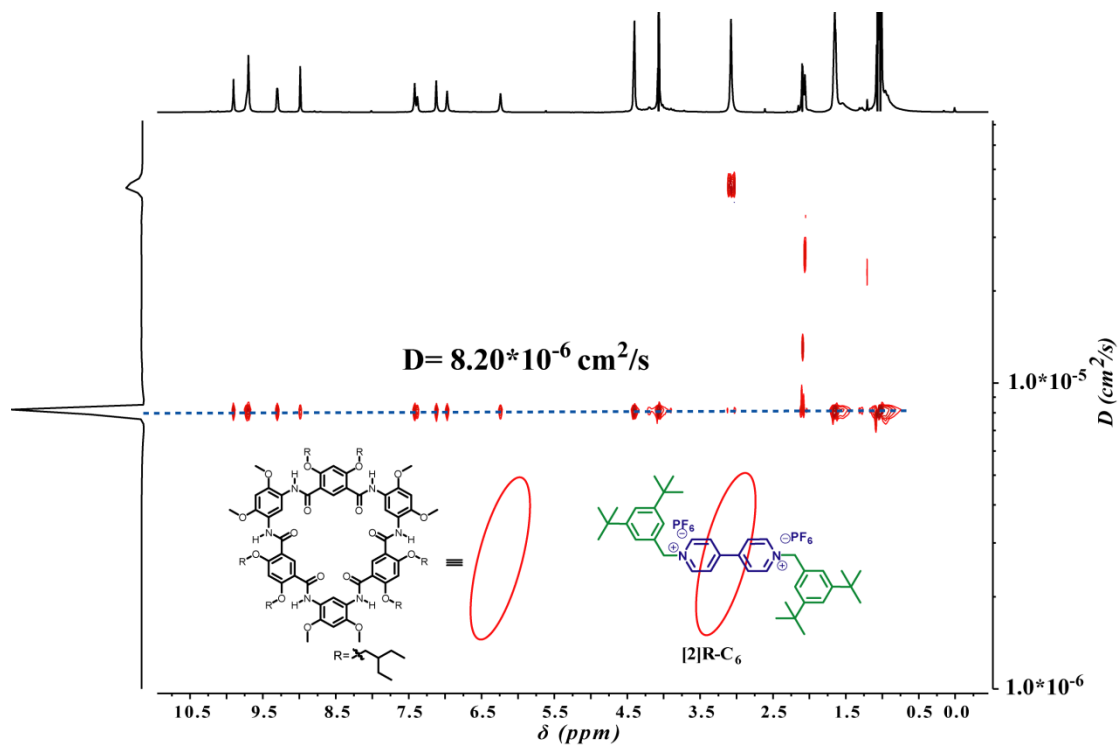

Figure S141 2D-DOSY NMR spectrum of  $[2]R-C_6$  ( $CD_3COCD_3$ , 600 MHz, 298K).

## 7. UV-vis Spectra of Rotaxanes

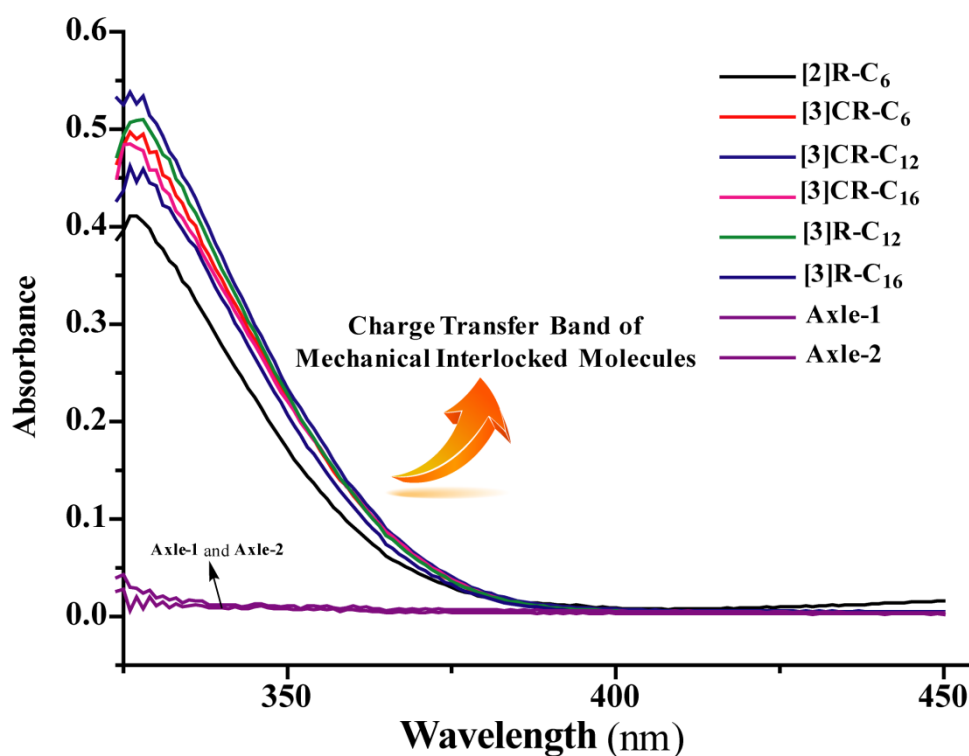

Figure S142 UV-vis spectrum of rotaxanes [2]R-C<sub>6</sub>, [3]CR-C<sub>6</sub>, [3]R-C<sub>12</sub>, [3]CR-C<sub>12</sub>, [3]R-C<sub>16</sub>, [3]CR-C<sub>16</sub>, Axle-1 and Axle-1 in acetone (concentration of the compound is  $5 \times 10^{-5}$  mol/L).

## 8. Redox-Responsive of Host-Guest Complexes and Rotaxanes

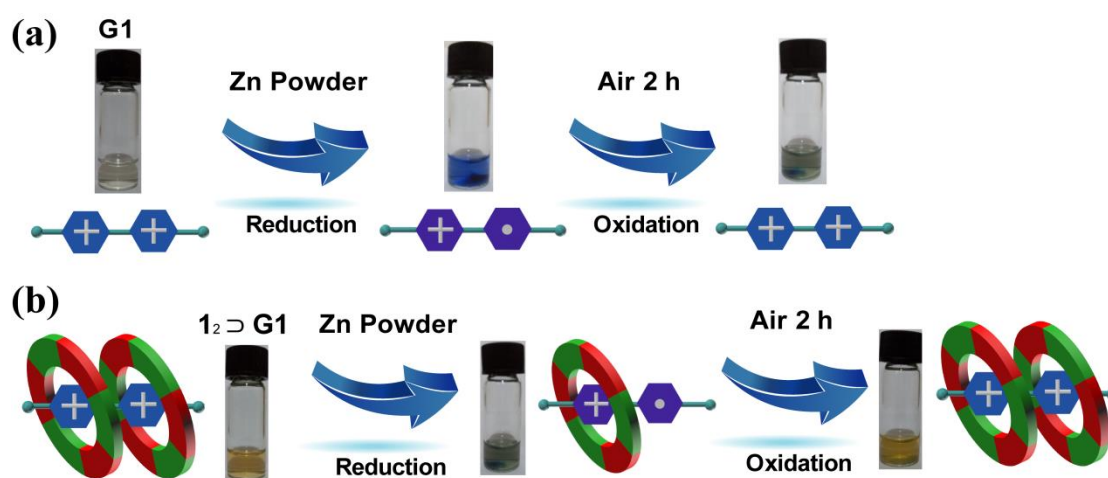

Figure S143 Graphical cartoon representation of redox control of (a) guest G1 and (b) complex  $1_2 \supset G1$  and photo showing color changes of redox-responsive complexation, solvent is argon-purged acetone.

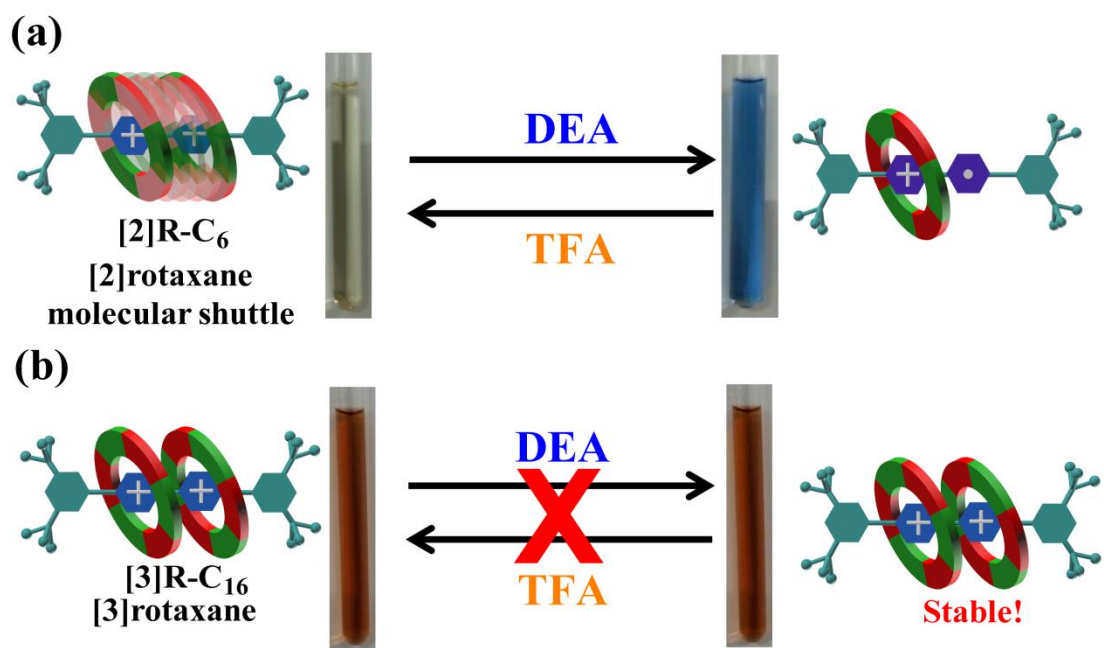

**Figure S144** Graphical cartoon representation of redox control of (a) molecular shuttle **[2]R-C<sub>6</sub>** and (b) [3]rotaxane **[3]R-C<sub>16</sub>** and photo showing color changes of redox-responsive complexation, solvent is argon-purged acetone.



## 9. X-Ray Single Crystal Structures of $3_2 \supset G1$ and [3]CR-C<sub>6</sub>

Crystallographic data (excluding structure factors) for the structures  $3_2 \supset G1$  and [3]CR-C<sub>6</sub> reported in this communication have been deposited with the Cambridge Crystallographic Data Centre as supplementary publication no. [CCDC-1475246](https://www.ccdc.cam.ac.uk/data_request/cif) and [CCDC-1475247](https://www.ccdc.cam.ac.uk/data_request/cif). Data collection and structure refinement details can be found in the CIF files or obtained free of charge via [www.ccdc.cam.ac.uk/data\\_request/cif](https://www.ccdc.cam.ac.uk/data_request/cif).

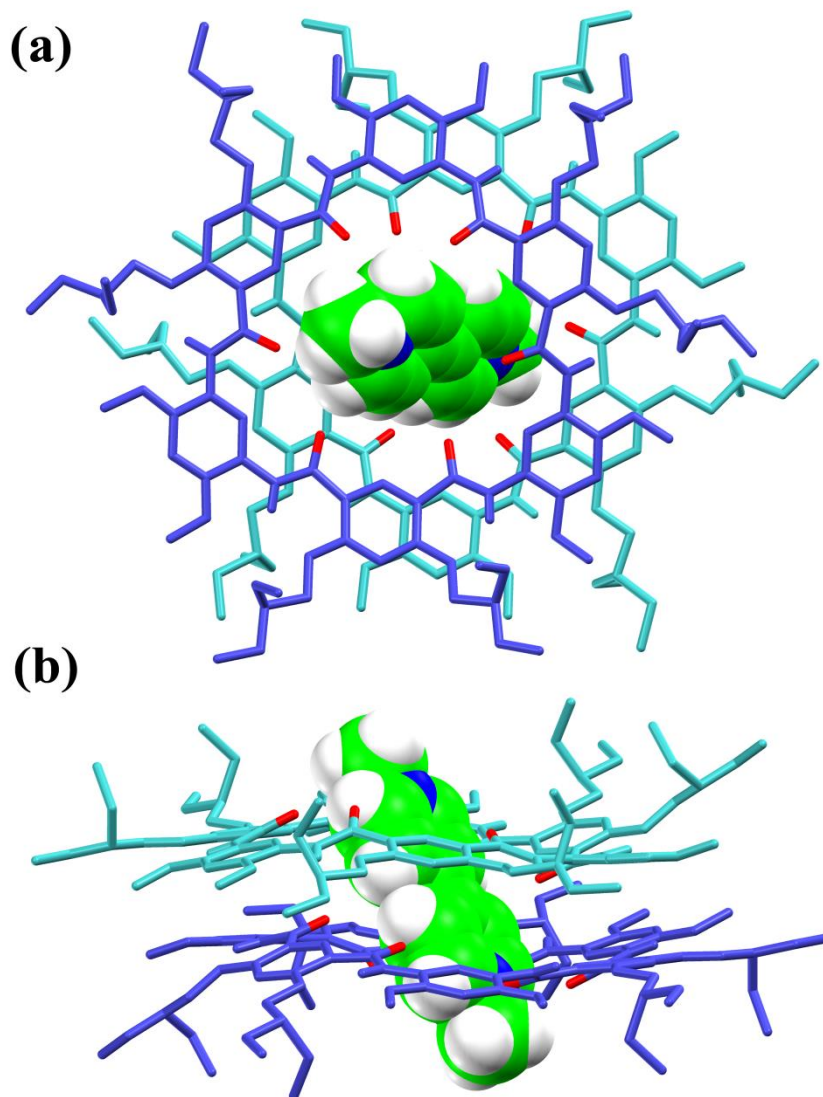

**Figure S145** X-ray structure of [3]pseudorotaxane  $3_2 \supset G1$ : (a) top view and (b) side view; cyclo[6]aramide **3** is shown in wire framing representations in cyan and purple, the oxygens in the cavity of macro cycles are shown in red. **G1** is shown in space filling representations. PF<sub>6</sub><sup>-</sup> counterions and hydrogens except the ones involved in hydrogen bonding were omitted for clarity.

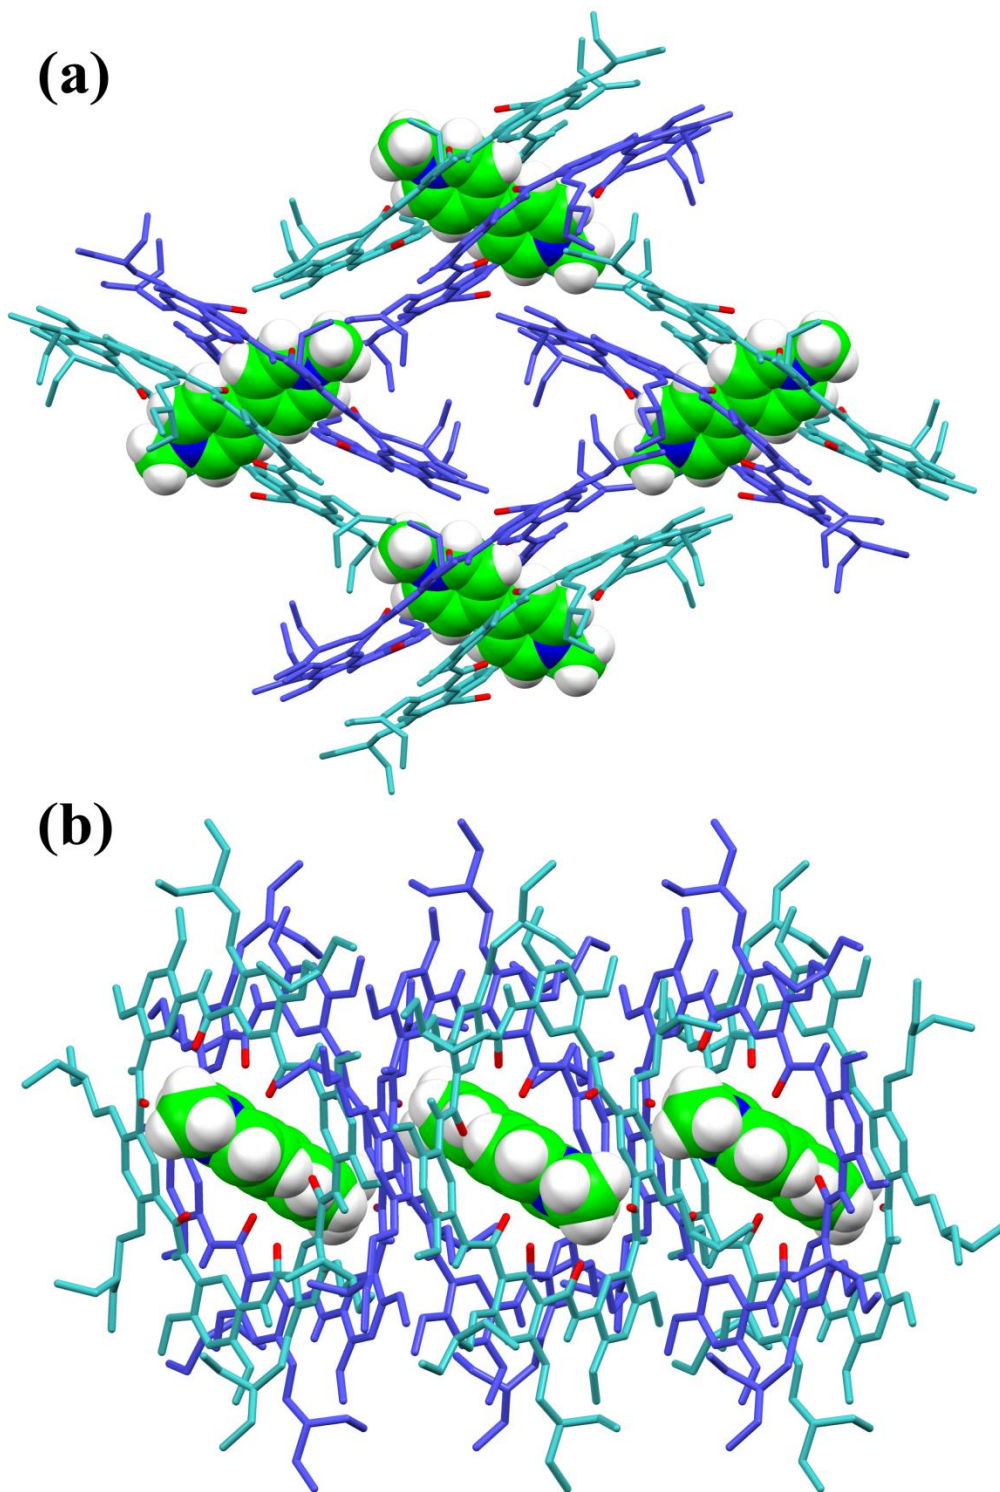

**Figure S146** X-ray structure packing of [3]pseudorotaxane  $3_2 \supset G1$ , cyclo[6]aramide **3** is shown in wire framing representations in cyan and purple, the oxygens in the cavity of macro cycles are shown in red. **G1** is shown in space filling representations.

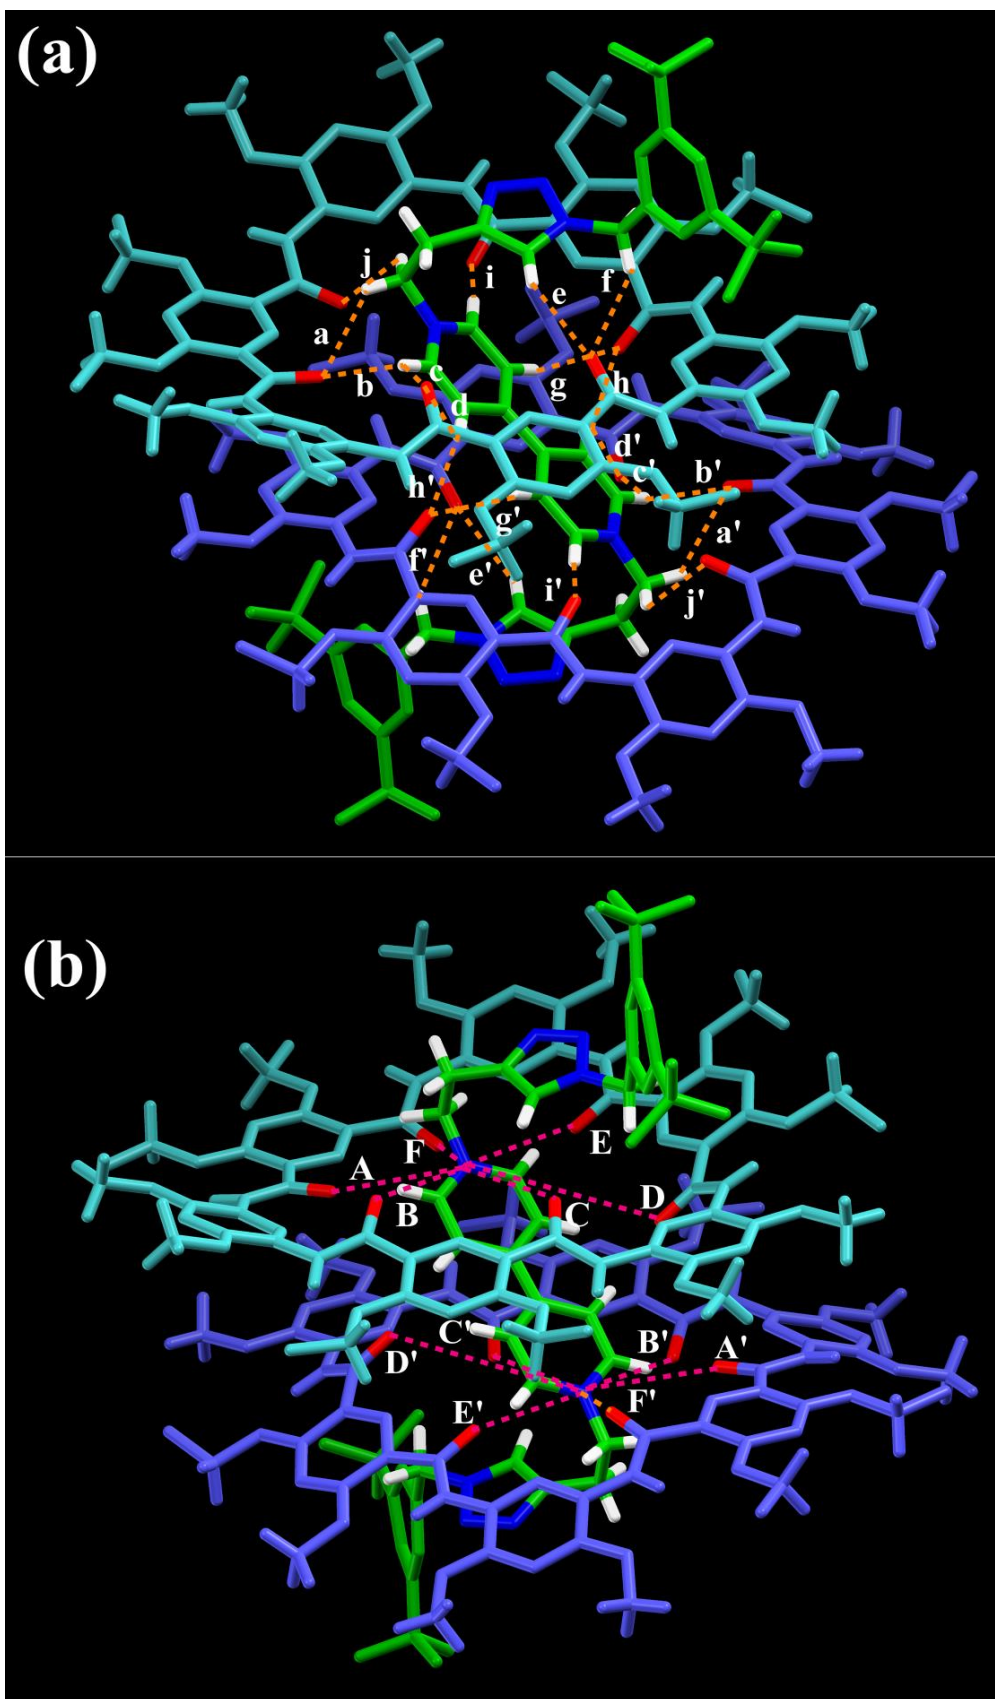

**Figure S147** X-ray crystal structure of rotaxane [3]CR-C<sub>6</sub> (a) side and (b) top views. PF<sub>6</sub><sup>-</sup> counterions and hydrogens except the ones involved in hydrogen bonding were omitted for clarity.

**Table S4** C-H...O hydrogen bonds in the crystal structure of rotaxane [3]CR-C<sub>6</sub>

| No. of C-H ...O hydrogen bonds | H ...O / Å<br>C-H...O angles | No. of C-H ...O hydrogen bonds | H ...O / Å<br>(C-H...O angles) |
|--------------------------------|------------------------------|--------------------------------|--------------------------------|
| a                              | 2.721 (136.02 °)             | a'                             | 2.721 (136.02 °)               |
| b                              | 2.174 (132.31 °)             | b'                             | 2.174 (132.31 °)               |
| c                              | 2.429 (117.87 °)             | c'                             | 2.429 (117.87 °)               |
| d                              | 2.789 (104.60 °)             | d'                             | 2.789 (104.60 °)               |
| e                              | 2.457 (141.76 °)             | e'                             | 2.457 (141.76 °)               |
| f                              | 2.854 (134.66 °)             | f'                             | 2.854 (134.66 °)               |
| g                              | 2.310 (144.34 °)             | g'                             | 2.310 (144.34 °)               |
| h                              | 2.233 (152.01 °)             | h'                             | 2.233 (152.01 °)               |
| i                              | 2.173 (160.49 °)             | i'                             | 2.173 (160.49 °)               |
| j                              | 2.683 (115.24 °)             | j'                             | 2.683 (160.49 °)               |

**Table S5** N<sup>+</sup> ...O interaction in the crystal structure of rotaxane [3]CR-C<sub>6</sub>

| No. of N <sup>+</sup> ...O interaction | N <sup>+</sup> ...O / Å | No. of N <sup>+</sup> ...O interaction | N <sup>+</sup> ...O / Å |
|----------------------------------------|-------------------------|----------------------------------------|-------------------------|
| A                                      | 3.515                   | A'                                     | 3.515                   |
| B                                      | 4.125                   | B'                                     | 4.125                   |
| C                                      | 4.576                   | C'                                     | 4.576                   |
| D                                      | 5.181                   | D'                                     | 5.181                   |
| E                                      | 4.014                   | E'                                     | 4.014                   |
| F                                      | 3.563                   | F'                                     | 3.563                   |

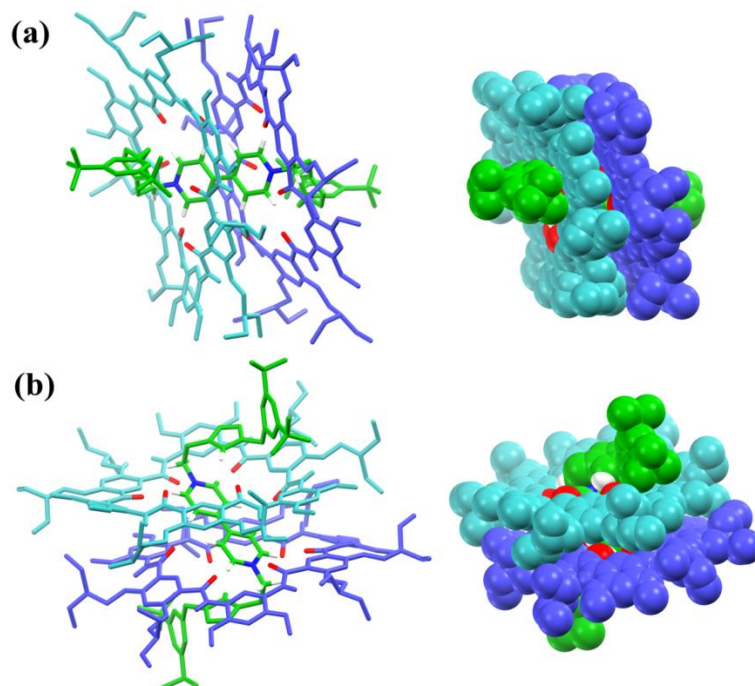**Figure S148** X-ray Crystal structure of rotaxane [3]CR-C<sub>6</sub> (a) side and (b) top views. Insets are the space filling models. PF<sub>6</sub><sup>-</sup> counterions and hydrogens except the ones involved in hydrogen bonding were omitted for clarity.

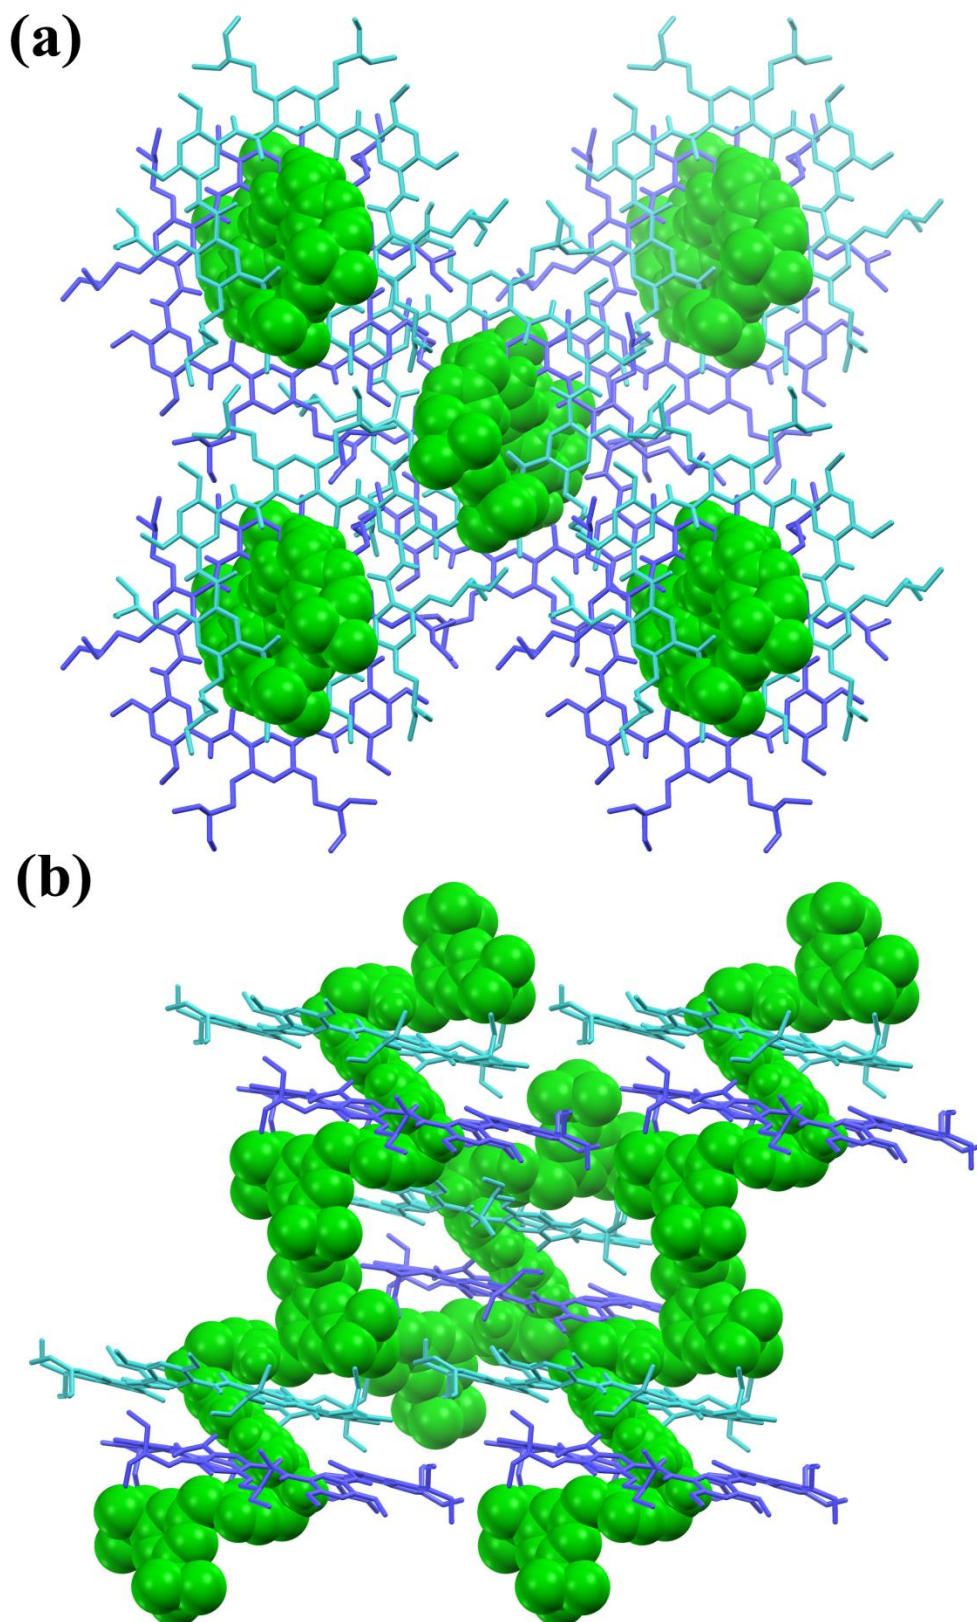

**Figure S149** X-ray structure packing of [3] rotaxane [3]CR-C<sub>6</sub>. (a) from the a axle and (b) from the b axle. Cyclo[6]aramide **3** is shown in wire framing representations in cyan and purple and **Axle-1** is shown in space filling representations in green. PF<sub>6</sub><sup>-</sup> counterions and hydrogens except the ones involved in hydrogen bonding were omitted for clarity.

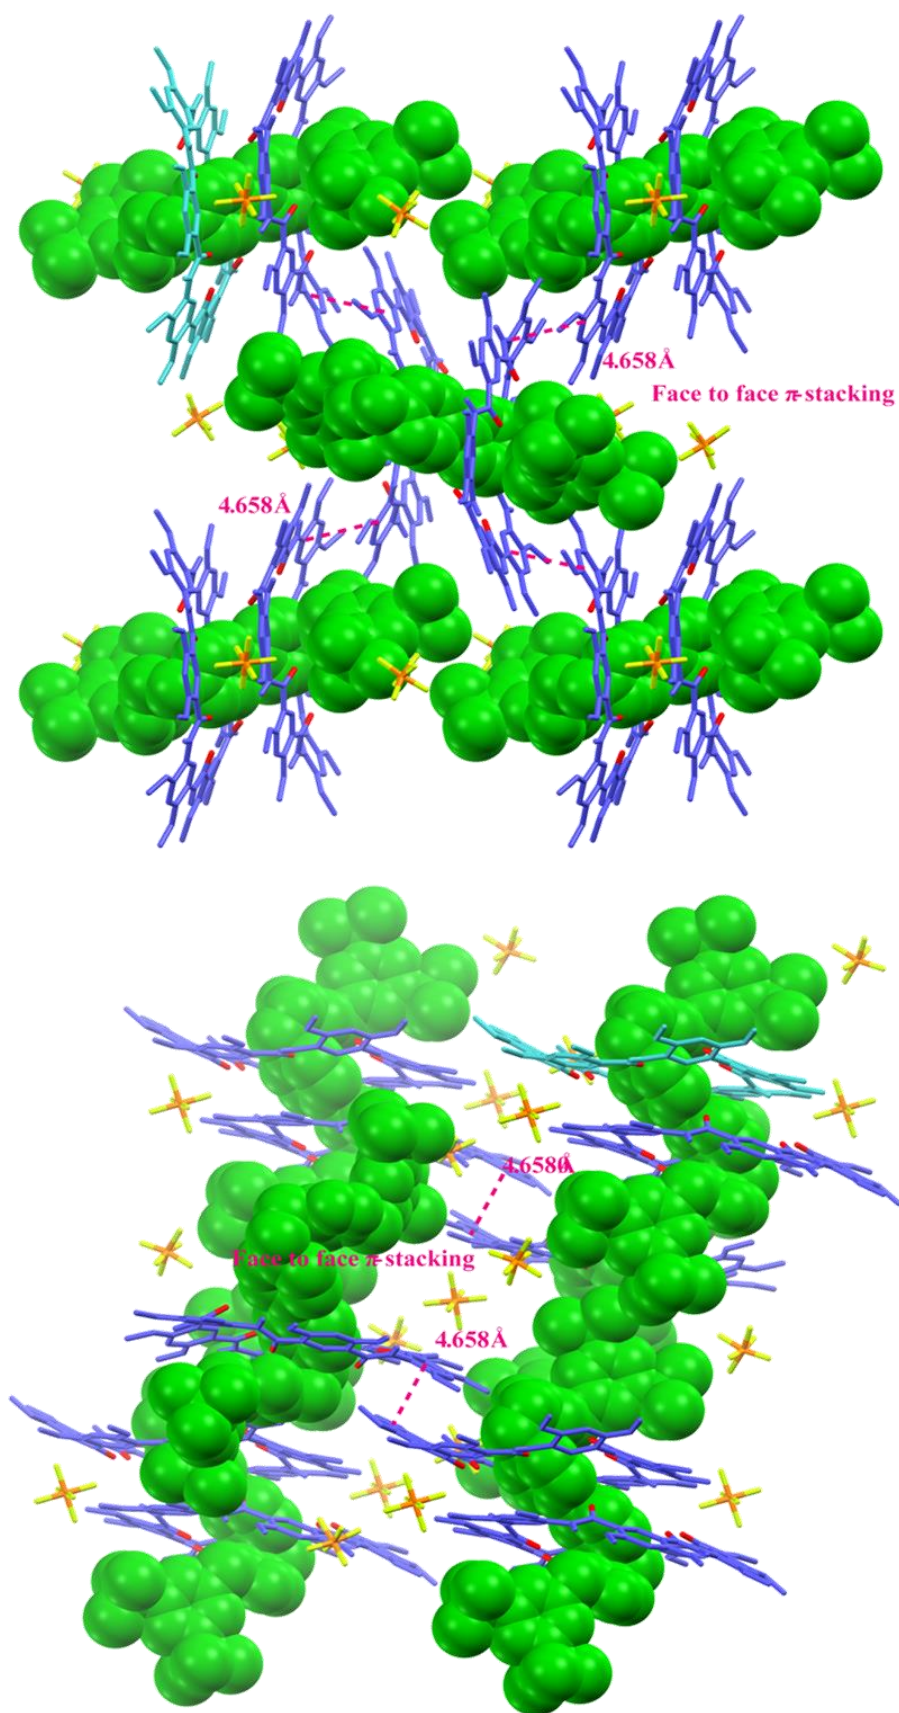

**Figure S150** X-ray structure packing of [3] rotaxane [3]CR-C<sub>6</sub>, (a) from the c\* axle and (b) from the b\* axle. Cyclo[6]aramide **3** is shown in wire framing representations in cyan and purple and

**Axle-1** is shown in space filling representations in green and oxygens in cavities are showing in red, hydrogens were omitted for clarity. The dashed white lines indicate the weak  $\pi$ -stacking parameters: centroid-centroid distance (Å), 4.658; ring plane-ring plane inclination (°), 2.96.

**Table S6** Crystallographic data for [3]pseudorotaxane **3<sub>2</sub> ⊃ G1** and [3] rotaxane **[3]CR-C<sub>6</sub>**

| Identification code                         | <b>3<sub>2</sub> ⊃ G1</b>                                                       | <b>[3]CR-C<sub>6</sub></b>                                                                       |
|---------------------------------------------|---------------------------------------------------------------------------------|--------------------------------------------------------------------------------------------------|
| CCDC                                        | 1475246                                                                         | 1475247                                                                                          |
| Empirical formula                           | C <sub>90</sub> H <sub>121</sub> N <sub>7</sub> O <sub>18</sub> PF <sub>6</sub> | C <sub>216</sub> H <sub>292</sub> N <sub>20</sub> O <sub>36</sub> P <sub>2</sub> F <sub>12</sub> |
| Formula weight                              | 1733.91                                                                         | 4034.64                                                                                          |
| Temperature/K                               | 123 (2) K                                                                       | 150 (2) K                                                                                        |
| Wavelength                                  | 0.71073 Å                                                                       | 0.71073 Å                                                                                        |
| Crystal system                              | Monoclinic                                                                      | Monoclinic                                                                                       |
| Space group                                 | P2 <sub>1</sub> /c                                                              | P2 <sub>1</sub> /n                                                                               |
| a/Å                                         | 22.630 (8)                                                                      | 22.928 (2)                                                                                       |
| b/Å                                         | 23.529 (9)                                                                      | 25.6042 (12)                                                                                     |
| c/Å                                         | 19.425 (7)                                                                      | 23.2131 (15)                                                                                     |
| $\alpha$ /°                                 | 90                                                                              | 90                                                                                               |
| $\beta$ /°                                  | 112.979 (5)                                                                     | 111.030 (9)                                                                                      |
| $\gamma$ /°                                 | 90                                                                              | 90                                                                                               |
| Volume/Å <sup>3</sup>                       | 9522 (6)                                                                        | 12719.6 (17)                                                                                     |
| Z                                           | 4                                                                               | 2                                                                                                |
| $\rho_{\text{calc}}$ mg/mm <sup>3</sup>     | 1.209                                                                           | 1.053                                                                                            |
| $\mu$ (Mo K $\alpha$ ) /mm <sup>-1</sup>    | 0.107                                                                           | 0.089                                                                                            |
| F(000)                                      | 3692                                                                            | 4308                                                                                             |
| Crystal size/mm <sup>3</sup>                | 0.31 × 0.18 × 0.18                                                              | 0.28 × 0.21 × 0.18                                                                               |
| 2 $\theta$ range for data collection        | 0.98 to 25.60 °                                                                 | 2.89 to 25.51 °                                                                                  |
| Index ranges                                | -27 ≤ h ≤ 27, -19 ≤ k ≤ 28,<br>-23 ≤ l ≤ 23                                     | -27 ≤ h ≤ 23, -30 ≤ k ≤ 31,<br>-28 ≤ l ≤ 26                                                      |
| Reflections collected                       | 54751                                                                           | 52517                                                                                            |
| Independent reflections                     | 17399 [R(int) = 0.0938]                                                         | 23345 [R(int) = 0.0624]                                                                          |
| Completeness to theta                       | 98.4 % (25.51 °)                                                                | 97.0 % (25.60 °)                                                                                 |
| Max. and min. transmission                  | 0.9810 and 0.9675                                                               | 0.9841 and 0.9755                                                                                |
| Data/restraints/parameters                  | 17399 / 288 / 1170                                                              | 23345 / 465 / 1400                                                                               |
| Goodness-of-fit on F <sup>2</sup>           | 1.262                                                                           | 1.051                                                                                            |
| Final R indices [I > 2sigma (I)]            | R <sup>1</sup> = 0.0896, wR <sup>2</sup> = 0.2339                               | R <sup>1</sup> = 0.1198, wR <sup>2</sup> = 0.3108                                                |
| R indices (all data)                        | R <sup>1</sup> = 0.1534, wR <sup>2</sup> = 0.2667                               | R <sup>1</sup> = 0.1758, wR <sup>2</sup> = 0.3386                                                |
| Largest diff. peak/hole / e Å <sup>-3</sup> | 0.728 / -0.558                                                                  | 1.055 / -0.622                                                                                   |

## 10. Molecular Modeling

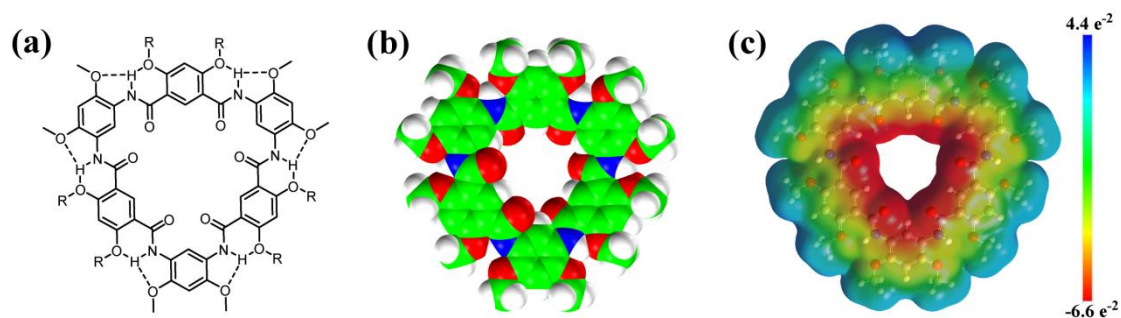

The structure of compact [3]rotaxane **[3]R-C<sub>1</sub>** based on cyclo[6]aramide **4** were optimized by the density functional theory (DFT) method at the B3PW91/6-31G (d, p) level by employing the Gaussian09 program.<sup>[1]</sup> Corresponding atomic coordinates were listed in **Table S7** and optimized geometry structures of **[3]R-C<sub>1</sub>** were displayed in **Figure S152**.

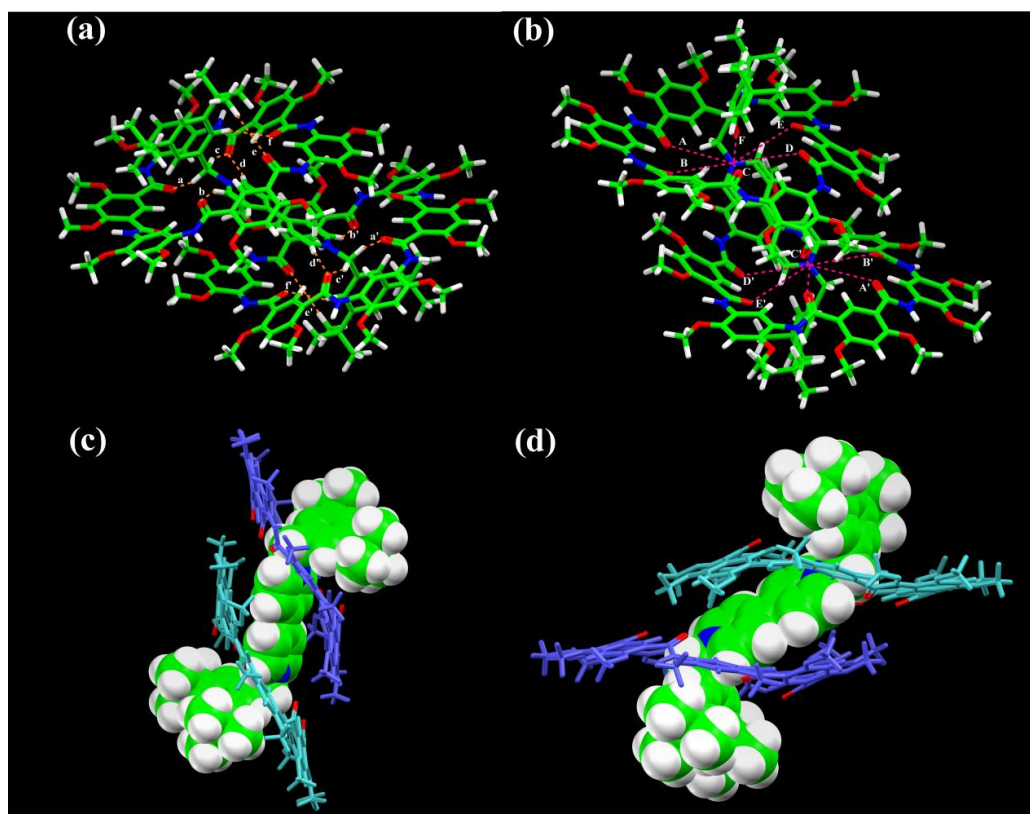



**Figure S152** Two Side view (a) and (b) of optimized geometry of [3]R-C<sub>1</sub> at the B3PW91/6-31G (d, p) level (green = carbon, white = hydrogen, red = oxygen and blue = nitrogen) and two side view (c) and (d) of optimized geometry of [3]R-C<sub>1</sub> at the B3PW91/6-31G (d, p) level (green = C, white = H, blue = N for axle molecule in space filling models, red = O in the cavity of cyclo[6]aramides, cyclo[6]aramides are shown in cyan or light blue). All side chains are replaced by methyl groups for simplicity and the PF<sub>6</sub><sup>-</sup> counterions are omitted. The dashed orange lines indicate intermolecular H-bonds a-f and a'-f' (a = 2.677 Å (120.42 °), b = 2.280 Å (144.02 °), c = 2.515 Å (155.49 °), d = 2.309 Å (162.90 °), e = 2.872 Å (169.83 °), f = 2.540 Å (156.44 °), a' = 2.677 Å (117.58 °), b' = 2.280 Å (144.02 °), c' = 2.515 Å (155.49 °), d' = 2.309 Å (162.90 °), e' = 2.872 Å (169.83 °), f' = 2.540 Å (156.44 °)) the dashed pink lines indicate the N<sup>+</sup> ···O interaction A-F and A'-F' (A = 4.365 Å, B = 4.808 Å, C = 4.373 Å, D = 4.574 Å, E = 3.675 Å, F = 3.924 Å, A' = 4.365 Å, B' = 4.808 Å, C' = 4.373 Å, D' = 4.574 Å, E' = 3.675 Å, F' = 3.924 Å).

**Table S7** Atomic coordinates for the optimized structure of the rotaxane [3]R-C<sub>1</sub>

| Center Number | Atomic Number | Atomic Type | Coordinates (Angstroms) |          |          |
|---------------|---------------|-------------|-------------------------|----------|----------|
|               |               |             | X                       | Y        | Z        |
| 1             | 6             | 0           | 2.84135                 | -0.66588 | -1.01377 |
| 2             | 1             | 0           | 3.45211                 | -1.408   | -1.51551 |
| 3             | 6             | 0           | 1.5256                  | -0.89311 | -0.72944 |
| 4             | 1             | 0           | 1.13164                 | -1.861   | -1.00849 |
| 5             | 6             | 0           | 0.69927                 | 0.09487  | -0.11314 |
| 6             | 6             | 0           | 1.39421                 | 1.28648  | 0.25863  |
| 7             | 1             | 0           | 0.88929                 | 2.09315  | 0.77559  |
| 8             | 6             | 0           | 2.71831                 | 1.46192  | -0.02583 |
| 9             | 1             | 0           | 3.26432                 | 2.35487  | 0.25882  |
| 10            | 6             | 0           | 4.87711                 | 0.74098  | -0.98038 |
| 11            | 1             | 0           | 5.05649                 | 1.8047   | -0.80791 |
| 12            | 1             | 0           | 5.4656                  | 0.19992  | -0.23339 |
| 13            | 7             | 0           | 3.44324                 | 0.51523  | -0.69064 |
| 14            | 6             | 0           | -2.84136                | 0.66588  | 1.01384  |
| 15            | 1             | 0           | -3.45211                | 1.40799  | 1.51557  |
| 16            | 6             | 0           | -1.52561                | 0.89311  | 0.7295   |
| 17            | 1             | 0           | -1.13165                | 1.861    | 1.00854  |
| 18            | 6             | 0           | -0.69927                | -0.09487 | 0.1132   |
| 19            | 6             | 0           | -1.39422                | -1.28649 | -0.25856 |
| 20            | 1             | 0           | -0.88931                | -2.09315 | -0.77553 |
| 21            | 6             | 0           | -2.71832                | -1.46192 | 0.02591  |
| 22            | 1             | 0           | -3.26433                | -2.35488 | -0.25875 |
| 23            | 6             | 0           | -4.87712                | -0.74099 | 0.98046  |
| 24            | 1             | 0           | -5.0565                 | -1.80472 | 0.80801  |
| 25            | 1             | 0           | -5.46561                | -0.19995 | 0.23346  |
| 26            | 7             | 0           | -3.44325                | -0.51524 | 0.69071  |

|    |   |   |          |          |          |
|----|---|---|----------|----------|----------|
| 27 | 6 | 0 | 8.23025  | 0.92981  | 1.77006  |
| 28 | 6 | 0 | 5.15675  | 5.10111  | -0.00354 |
| 29 | 6 | 0 | 8.87867  | 3.31427  | 1.53755  |
| 30 | 6 | 0 | 9.95925  | 4.19898  | 1.71753  |
| 31 | 6 | 0 | 9.80908  | 5.5579   | 1.44119  |
| 32 | 1 | 0 | 10.64273 | 6.23228  | 1.58114  |
| 33 | 6 | 0 | 8.58971  | 6.04678  | 0.97399  |
| 34 | 6 | 0 | 7.50251  | 5.17353  | 0.78935  |
| 35 | 6 | 0 | 7.65661  | 3.81732  | 1.0876   |
| 36 | 1 | 0 | 6.82215  | 3.14632  | 0.96929  |
| 37 | 6 | 0 | 12.24911 | 4.46521  | 2.33469  |
| 38 | 1 | 0 | 12.55375 | 4.94268  | 1.3952   |
| 39 | 1 | 0 | 13.05352 | 3.81694  | 2.68363  |
| 40 | 1 | 0 | 12.05868 | 5.23574  | 3.0917   |
| 41 | 6 | 0 | 9.43663  | 8.26628  | 0.73819  |
| 42 | 1 | 0 | 9.79876  | 8.3613   | 1.7692   |
| 43 | 1 | 0 | 9.04637  | 9.22995  | 0.40905  |
| 44 | 1 | 0 | 10.267   | 7.9722   | 0.08469  |
| 45 | 6 | 0 | 4.15925  | 5.77244  | -0.90425 |
| 46 | 6 | 0 | 3.26114  | 4.90262  | -1.51033 |
| 47 | 1 | 0 | 3.37018  | 3.84468  | -1.31945 |
| 48 | 6 | 0 | 2.23388  | 5.29068  | -2.36241 |
| 49 | 6 | 0 | 2.0886   | 6.66886  | -2.61073 |
| 50 | 6 | 0 | 2.99475  | 7.58026  | -2.05266 |
| 51 | 1 | 0 | 2.89556  | 8.63442  | -2.27161 |
| 52 | 6 | 0 | 4.03171  | 7.14079  | -1.21924 |
| 53 | 6 | 0 | 4.89012  | 9.36794  | -0.98072 |
| 54 | 1 | 0 | 3.95223  | 9.81987  | -0.63836 |
| 55 | 1 | 0 | 5.01216  | 9.53618  | -2.05651 |
| 56 | 6 | 0 | 0.91893  | 8.40822  | -3.77562 |
| 57 | 1 | 0 | 1.80512  | 8.76421  | -4.31216 |
| 58 | 1 | 0 | 0.73452  | 9.04167  | -2.90013 |
| 59 | 6 | 0 | 1.44634  | 4.14543  | -2.92295 |
| 60 | 6 | 0 | -0.13015 | -0.89694 | -4.19552 |
| 61 | 6 | 0 | -0.79146 | 3.41681  | -3.64432 |
| 62 | 6 | 0 | -2.15046 | 3.84761  | -3.62896 |
| 63 | 6 | 0 | -3.18236 | 2.93262  | -3.80678 |
| 64 | 1 | 0 | -4.21092 | 3.25793  | -3.75112 |
| 65 | 6 | 0 | -2.88659 | 1.5832   | -3.98094 |
| 66 | 6 | 0 | -1.53066 | 1.13931  | -4.02739 |
| 67 | 6 | 0 | -0.50173 | 2.073    | -3.87649 |
| 68 | 1 | 0 | 0.52077  | 1.73581  | -3.88895 |
| 69 | 6 | 0 | -3.66603 | 5.64536  | -3.23325 |
| 70 | 1 | 0 | -4.23264 | 5.55266  | -4.16685 |

|     |   |   |          |           |          |
|-----|---|---|----------|-----------|----------|
| 71  | 1 | 0 | -3.56886 | 6.69903   | -2.97285 |
| 72  | 1 | 0 | -4.17773 | 5.10813   | -2.42801 |
| 73  | 6 | 0 | -5.18687 | 0.95419   | -3.92835 |
| 74  | 1 | 0 | -5.33075 | 1.57672   | -3.04084 |
| 75  | 1 | 0 | -5.71864 | 0.01333   | -3.79587 |
| 76  | 1 | 0 | -5.55407 | 1.4775    | -4.81871 |
| 77  | 6 | 0 | -0.14966 | -2.36101  | -3.86598 |
| 78  | 6 | 0 | 1.08402  | -2.88727  | -3.48633 |
| 79  | 1 | 0 | 1.94563  | -2.23079  | -3.52961 |
| 80  | 6 | 0 | 1.27433  | -4.17772  | -2.99402 |
| 81  | 6 | 0 | 0.14179  | -5.02159  | -2.96854 |
| 82  | 6 | 0 | -1.11122 | -4.54022  | -3.36155 |
| 83  | 1 | 0 | -1.9733  | -5.19082  | -3.32254 |
| 84  | 6 | 0 | -1.2702  | -3.21635  | -3.78314 |
| 85  | 6 | 0 | -3.65465 | -3.48826  | -3.97219 |
| 86  | 1 | 0 | -3.80661 | -3.77293  | -2.92609 |
| 87  | 1 | 0 | -3.62297 | -4.37583  | -4.61335 |
| 88  | 6 | 0 | -0.78784 | -7.18343  | -2.49595 |
| 89  | 1 | 0 | -1.22089 | -7.32941  | -3.49186 |
| 90  | 1 | 0 | -1.5573  | -6.82246  | -1.8045  |
| 91  | 6 | 0 | 2.64711  | -4.44708  | -2.43583 |
| 92  | 6 | 0 | 6.89373  | -3.67963  | 1.02875  |
| 93  | 6 | 0 | 4.12447  | -6.12432  | -1.38574 |
| 94  | 6 | 0 | 4.42902  | -7.49778  | -1.43975 |
| 95  | 6 | 0 | 5.60541  | -7.98235  | -0.86782 |
| 96  | 1 | 0 | 5.84016  | -9.03636  | -0.92749 |
| 97  | 6 | 0 | 6.48543  | -7.10735  | -0.22775 |
| 98  | 6 | 0 | 6.17783  | -5.73871  | -0.1387  |
| 99  | 6 | 0 | 5.00022  | -5.26389  | -0.72105 |
| 100 | 1 | 0 | 4.77007  | -4.2119   | -0.67196 |
| 101 | 6 | 0 | 3.79447  | -9.65281  | -2.2466  |
| 102 | 1 | 0 | 4.71789  | -9.79795  | -2.82013 |
| 103 | 1 | 0 | 2.95762  | -10.06914 | -2.80858 |
| 104 | 1 | 0 | 3.8773   | -10.1751  | -1.28487 |
| 105 | 6 | 0 | 8.0751   | -8.83407  | 0.19677  |
| 106 | 1 | 0 | 7.37544  | -9.51256  | 0.70068  |
| 107 | 1 | 0 | 9.04965  | -8.90939  | 0.68039  |
| 108 | 1 | 0 | 8.1708   | -9.12619  | -0.85626 |
| 109 | 6 | 0 | 8.08235  | -2.82062  | 1.36009  |
| 110 | 6 | 0 | 7.81083  | -1.46156  | 1.49578  |
| 111 | 1 | 0 | 6.78576  | -1.13627  | 1.37313  |
| 112 | 6 | 0 | 8.76451  | -0.47887  | 1.75068  |
| 113 | 6 | 0 | 10.09759 | -0.91453  | 1.90605  |
| 114 | 6 | 0 | 10.41597 | -2.27191  | 1.7898   |

|     |   |   |           |          |          |
|-----|---|---|-----------|----------|----------|
| 115 | 1 | 0 | 11.44044  | -2.59227 | 1.91691  |
| 116 | 6 | 0 | 9.42771   | -3.2189  | 1.50426  |
| 117 | 6 | 0 | 11.04334  | -4.99495 | 1.49515  |
| 118 | 1 | 0 | 11.43411  | -4.79356 | 2.49858  |
| 119 | 1 | 0 | 11.69361  | -4.53641 | 0.74187  |
| 120 | 6 | 0 | 12.39425  | -0.35377 | 2.33443  |
| 121 | 1 | 0 | 12.78887  | -0.81622 | 1.42287  |
| 122 | 1 | 0 | 12.51527  | -1.03634 | 3.18274  |
| 123 | 7 | 0 | 9.1351    | 1.94828  | 1.75054  |
| 124 | 1 | 0 | 10.11135  | 1.70083  | 1.86384  |
| 125 | 7 | 0 | 6.33877   | 5.72853  | 0.22101  |
| 126 | 1 | 0 | 6.4302    | 6.68187  | -0.11006 |
| 127 | 7 | 0 | 0.16587   | 4.38829  | -3.3574  |
| 128 | 1 | 0 | -0.16952  | 5.34305  | -3.30991 |
| 129 | 7 | 0 | -1.33875  | -0.22784 | -4.13322 |
| 130 | 1 | 0 | -2.17622  | -0.79912 | -4.06824 |
| 131 | 7 | 0 | 2.92488   | -5.70632 | -1.98931 |
| 132 | 1 | 0 | 2.24681   | -6.43128 | -2.18613 |
| 133 | 7 | 0 | 7.13383   | -4.89254 | 0.45739  |
| 134 | 1 | 0 | 8.08651   | -5.23611 | 0.48178  |
| 135 | 8 | 0 | 7.0109    | 1.11292  | 1.75257  |
| 136 | 8 | 0 | 4.89488   | 3.97893  | 0.44603  |
| 137 | 8 | 0 | 11.12054  | 3.63104  | 2.15144  |
| 138 | 8 | 0 | 8.35913   | 7.35268  | 0.65013  |
| 139 | 8 | 0 | 4.93854   | 7.98358  | -0.66683 |
| 140 | 8 | 0 | 1.0583    | 7.04358  | -3.40684 |
| 141 | 8 | 0 | 1.93404   | 3.02097  | -2.91498 |
| 142 | 8 | 0 | 0.92645   | -0.32329 | -4.41683 |
| 143 | 8 | 0 | -2.33464  | 5.16432  | -3.40224 |
| 144 | 8 | 0 | -3.80971  | 0.61332  | -4.09126 |
| 145 | 8 | 0 | -2.47292  | -2.70586 | -4.13309 |
| 146 | 8 | 0 | 0.31976   | -6.29695 | -2.54171 |
| 147 | 8 | 0 | 3.46028   | -3.52603 | -2.36017 |
| 148 | 8 | 0 | 5.75337   | -3.24481 | 1.21757  |
| 149 | 8 | 0 | 3.50606   | -8.27909 | -2.0707  |
| 150 | 8 | 0 | 7.67308   | -7.48356 | 0.3271   |
| 151 | 8 | 0 | 9.7038    | -4.53936 | 1.36652  |
| 152 | 8 | 0 | 11.03527  | 0.02682  | 2.17312  |
| 153 | 6 | 0 | -8.23021  | -0.9298  | -1.77007 |
| 154 | 6 | 0 | -5.15671  | -5.10109 | 0.00353  |
| 155 | 6 | 0 | -8.87862  | -3.31427 | -1.5376  |
| 156 | 6 | 0 | -9.95919  | -4.19898 | -1.71761 |
| 157 | 6 | 0 | -9.80902  | -5.55791 | -1.44128 |
| 158 | 1 | 0 | -10.64266 | -6.23229 | -1.58125 |

|     |   |   |           |          |          |
|-----|---|---|-----------|----------|----------|
| 159 | 6 | 0 | -8.58965  | -6.04678 | -0.97406 |
| 160 | 6 | 0 | -7.50246  | -5.17353 | -0.78941 |
| 161 | 6 | 0 | -7.65656  | -3.81731 | -1.08764 |
| 162 | 1 | 0 | -6.82211  | -3.14631 | -0.96931 |
| 163 | 6 | 0 | -12.24904 | -4.46522 | -2.33481 |
| 164 | 1 | 0 | -12.55369 | -4.9427  | -1.39532 |
| 165 | 1 | 0 | -13.05345 | -3.81695 | -2.68374 |
| 166 | 1 | 0 | -12.0586  | -5.23574 | -3.09182 |
| 167 | 6 | 0 | -9.43656  | -8.26629 | -0.73831 |
| 168 | 1 | 0 | -9.79868  | -8.3613  | -1.76933 |
| 169 | 1 | 0 | -9.0463   | -9.22996 | -0.40917 |
| 170 | 1 | 0 | -10.26694 | -7.97222 | -0.08481 |
| 171 | 6 | 0 | -4.15921  | -5.77244 | 0.90422  |
| 172 | 6 | 0 | -3.26112  | -4.90262 | 1.51034  |
| 173 | 1 | 0 | -3.37018  | -3.84468 | 1.31949  |
| 174 | 6 | 0 | -2.23386  | -5.29069 | 2.36241  |
| 175 | 6 | 0 | -2.08856  | -6.66887 | 2.61069  |
| 176 | 6 | 0 | -2.99469  | -7.58027 | 2.0526   |
| 177 | 1 | 0 | -2.89549  | -8.63443 | 2.27152  |
| 178 | 6 | 0 | -4.03165  | -7.14079 | 1.21918  |
| 179 | 6 | 0 | -4.89004  | -9.36795 | 0.9806   |
| 180 | 1 | 0 | -3.95214  | -9.81986 | 0.63824  |
| 181 | 1 | 0 | -5.01208  | -9.53621 | 2.05639  |
| 182 | 6 | 0 | -0.91887  | -8.40824 | 3.77556  |
| 183 | 1 | 0 | -1.80505  | -8.76426 | 4.31208  |
| 184 | 1 | 0 | -0.73444  | -9.04167 | 2.90005  |
| 185 | 6 | 0 | -1.44635  | -4.14544 | 2.923    |
| 186 | 6 | 0 | 0.13013   | 0.89695  | 4.19554  |
| 187 | 6 | 0 | 0.79145   | -3.4168  | 3.64436  |
| 188 | 6 | 0 | 2.15046   | -3.84759 | 3.62899  |
| 189 | 6 | 0 | 3.18235   | -2.93259 | 3.80679  |
| 190 | 1 | 0 | 4.21092   | -3.2579  | 3.75111  |
| 191 | 6 | 0 | 2.88658   | -1.58318 | 3.98095  |
| 192 | 6 | 0 | 1.53065   | -1.1393  | 4.02742  |
| 193 | 6 | 0 | 0.50171   | -2.07299 | 3.87654  |
| 194 | 1 | 0 | -0.52079  | -1.7358  | 3.88901  |
| 195 | 6 | 0 | 3.66603   | -5.64533 | 3.23324  |
| 196 | 1 | 0 | 4.23266   | -5.55262 | 4.16682  |
| 197 | 1 | 0 | 3.56886   | -6.699   | 2.97284  |
| 198 | 1 | 0 | 4.17769   | -5.1081  | 2.42798  |
| 199 | 6 | 0 | 5.18685   | -0.95416 | 3.92831  |
| 200 | 1 | 0 | 5.33071   | -1.57667 | 3.04079  |
| 201 | 1 | 0 | 5.71862   | -0.01329 | 3.79584  |
| 202 | 1 | 0 | 5.55407   | -1.47748 | 4.81866  |

|     |   |   |           |          |          |
|-----|---|---|-----------|----------|----------|
| 203 | 6 | 0 | 0.14965   | 2.36102  | 3.86601  |
| 204 | 6 | 0 | -1.08404  | 2.88729  | 3.48636  |
| 205 | 1 | 0 | -1.94565  | 2.23082  | 3.52964  |
| 206 | 6 | 0 | -1.27434  | 4.17774  | 2.99403  |
| 207 | 6 | 0 | -0.1418   | 5.0216   | 2.96856  |
| 208 | 6 | 0 | 1.11121   | 4.54023  | 3.36157  |
| 209 | 1 | 0 | 1.9733    | 5.19083  | 3.32255  |
| 210 | 6 | 0 | 1.27019   | 3.21636  | 3.78316  |
| 211 | 6 | 0 | 3.65464   | 3.48826  | 3.97221  |
| 212 | 1 | 0 | 3.80661   | 3.77289  | 2.92611  |
| 213 | 1 | 0 | 3.62296   | 4.37585  | 4.61334  |
| 214 | 6 | 0 | 0.78785   | 7.18343  | 2.49594  |
| 215 | 1 | 0 | 1.2209    | 7.32942  | 3.49185  |
| 216 | 1 | 0 | 1.5573    | 6.82246  | 1.80449  |
| 217 | 6 | 0 | -2.64711  | 4.4471   | 2.43583  |
| 218 | 6 | 0 | -6.8937   | 3.67964  | -1.02874 |
| 219 | 6 | 0 | -4.12447  | 6.12435  | 1.38576  |
| 220 | 6 | 0 | -4.42903  | 7.4978   | 1.43978  |
| 221 | 6 | 0 | -5.60542  | 7.98236  | 0.86784  |
| 222 | 1 | 0 | -5.84018  | 9.03637  | 0.92752  |
| 223 | 6 | 0 | -6.48543  | 7.10736  | 0.22775  |
| 224 | 6 | 0 | -6.17783  | 5.73873  | 0.1387   |
| 225 | 6 | 0 | -5.00021  | 5.26391  | 0.72105  |
| 226 | 1 | 0 | -4.77006  | 4.21192  | 0.67195  |
| 227 | 6 | 0 | -3.7945   | 9.65282  | 2.24664  |
| 228 | 1 | 0 | -4.71792  | 9.79795  | 2.82017  |
| 229 | 1 | 0 | -2.95765  | 10.06916 | 2.80863  |
| 230 | 1 | 0 | -3.87732  | 10.17512 | 1.28492  |
| 231 | 6 | 0 | -8.07512  | 8.83407  | -0.19675 |
| 231 | 1 | 0 | -7.37545  | 9.51258  | -0.70065 |
| 233 | 1 | 0 | -9.04966  | 8.90939  | -0.68037 |
| 234 | 1 | 0 | -8.17082  | 9.12618  | 0.85628  |
| 235 | 6 | 0 | -8.08232  | 2.82062  | -1.36011 |
| 236 | 6 | 0 | -7.81079  | 1.46156  | -1.49578 |
| 237 | 1 | 0 | -6.78572  | 1.13628  | -1.37311 |
| 238 | 6 | 0 | -8.76446  | 0.47888  | -1.75071 |
| 239 | 6 | 0 | -10.09754 | 0.91453  | -1.90611 |
| 240 | 6 | 0 | -10.41592 | 2.27192  | -1.78987 |
| 241 | 1 | 0 | -11.4404  | 2.59227  | -1.91701 |
| 242 | 6 | 0 | -9.42768  | 3.2189   | -1.50431 |
| 243 | 6 | 0 | -11.04331 | 4.99496  | -1.49524 |
| 244 | 1 | 0 | -11.43405 | 4.79357  | -2.49868 |
| 245 | 1 | 0 | -11.69359 | 4.53642  | -0.74198 |
| 246 | 6 | 0 | -12.39419 | 0.35377  | -2.33454 |

|     |   |   |           |          |          |
|-----|---|---|-----------|----------|----------|
| 247 | 1 | 0 | -12.78883 | 0.81622  | -1.42298 |
| 248 | 1 | 0 | -12.51519 | 1.03634  | -3.18285 |
| 249 | 7 | 0 | -9.13505  | -1.94828 | -1.75058 |
| 250 | 1 | 0 | -10.1113  | -1.70083 | -1.86391 |
| 251 | 7 | 0 | -6.33872  | -5.72852 | -0.22105 |
| 252 | 1 | 0 | -6.43013  | -6.68188 | 0.10999  |
| 253 | 7 | 0 | -0.16587  | -4.38829 | 3.35744  |
| 254 | 1 | 0 | 0.16953   | -5.34304 | 3.30994  |
| 255 | 7 | 0 | 1.33873   | 0.22786  | 4.13325  |
| 256 | 1 | 0 | 2.1762    | 0.79913  | 4.06826  |
| 257 | 7 | 0 | -2.92488  | 5.70634  | 1.98932  |
| 258 | 1 | 0 | -2.24682  | 6.4313   | 2.18615  |
| 259 | 7 | 0 | -7.13382  | 4.89255  | -0.4574  |
| 260 | 1 | 0 | -8.0865   | 5.23611  | -0.48179 |
| 261 | 8 | 0 | -7.01085  | -1.11291 | -1.75255 |
| 262 | 8 | 0 | -4.89486  | -3.97889 | -0.44601 |
| 263 | 8 | 0 | -11.12048 | -3.63104 | -2.15153 |
| 264 | 8 | 0 | -8.35906  | -7.35269 | -0.65022 |
| 265 | 8 | 0 | -4.93847  | -7.98358 | 0.66674  |
| 266 | 8 | 0 | -1.05826  | -7.04359 | 3.4068   |
| 267 | 8 | 0 | -1.93408  | -3.02099 | 2.91507  |
| 268 | 8 | 0 | -0.92646  | 0.3233   | 4.41686  |
| 269 | 8 | 0 | 2.33463   | -5.1643  | 3.40226  |
| 270 | 8 | 0 | 3.80969   | -0.61329 | 4.09126  |
| 271 | 8 | 0 | 2.4729    | 2.70587  | 4.13312  |
| 272 | 8 | 0 | -0.31976  | 6.29696  | 2.54171  |
| 273 | 8 | 0 | -3.46028  | 3.52605  | 2.36018  |
| 274 | 8 | 0 | -5.75334  | 3.24483  | -1.21756 |
| 275 | 8 | 0 | -3.50608  | 8.27911  | 2.07074  |
| 276 | 8 | 0 | -7.67309  | 7.48357  | -0.3271  |
| 277 | 8 | 0 | -9.70377  | 4.53936  | -1.36658 |
| 278 | 8 | 0 | -11.03522 | -0.02682 | -2.1732  |
| 279 | 6 | 0 | 5.29346   | 0.33709  | -2.37491 |
| 280 | 6 | 0 | 6.15227   | -0.74977 | -2.54625 |
| 281 | 6 | 0 | 4.85331   | 1.06232  | -3.48722 |
| 282 | 6 | 0 | 6.58202   | -1.13631 | -3.82008 |
| 283 | 1 | 0 | 6.47797   | -1.29777 | -1.66795 |
| 284 | 6 | 0 | 5.26659   | 0.71128  | -4.77557 |
| 285 | 1 | 0 | 4.17055   | 1.8925   | -3.33542 |
| 286 | 6 | 0 | 6.12333   | -0.38887 | -4.9076  |
| 287 | 1 | 0 | 6.44239   | -0.6781  | -5.90488 |
| 288 | 6 | 0 | -5.29348  | -0.3371  | 2.37498  |
| 289 | 6 | 0 | -6.15231  | 0.74975  | 2.54631  |
| 290 | 6 | 0 | -4.85335  | -1.06232 | 3.4873   |

|     |   |   |          |          |          |
|-----|---|---|----------|----------|----------|
| 291 | 6 | 0 | -6.58209 | 1.13629  | 3.82013  |
| 292 | 1 | 0 | -6.47802 | 1.29774  | 1.668    |
| 293 | 6 | 0 | -5.26666 | -0.71129 | 4.77564  |
| 294 | 1 | 0 | -4.17059 | -1.8925  | 3.33551  |
| 295 | 6 | 0 | -6.12341 | 0.38885  | 4.90766  |
| 296 | 1 | 0 | -6.44251 | 0.67806  | 5.90493  |
| 297 | 6 | 0 | -4.80654 | -1.4612  | 6.03395  |
| 298 | 6 | 0 | -7.50237 | 2.34059  | 4.06143  |
| 299 | 6 | 0 | -6.0284  | -1.88629 | 6.87101  |
| 300 | 1 | 0 | -5.70048 | -2.42813 | 7.76507  |
| 301 | 1 | 0 | -6.62076 | -1.03054 | 7.20808  |
| 302 | 1 | 0 | -6.68848 | -2.5457  | 6.29758  |
| 303 | 6 | 0 | -4.00528 | -2.72373 | 5.69431  |
| 304 | 1 | 0 | -4.59812 | -3.42995 | 5.10225  |
| 305 | 1 | 0 | -3.09444 | -2.49313 | 5.13625  |
| 306 | 1 | 0 | -3.71197 | -3.23018 | 6.62015  |
| 307 | 6 | 0 | -3.90969 | -0.52573 | 6.86921  |
| 308 | 1 | 0 | -3.56922 | -1.03681 | 7.77735  |
| 309 | 1 | 0 | -3.02995 | -0.21646 | 6.29691  |
| 310 | 1 | 0 | -4.44679 | 0.37705  | 7.1773   |
| 311 | 6 | 0 | -8.75987 | 1.89192  | 4.83038  |
| 312 | 1 | 0 | -8.51348 | 1.45484  | 5.80235  |
| 313 | 1 | 0 | -9.4191  | 2.74834  | 5.01219  |
| 314 | 1 | 0 | -9.3226  | 1.14394  | 4.26178  |
| 315 | 6 | 0 | -6.73828 | 3.39471  | 4.88701  |
| 316 | 1 | 0 | -5.83912 | 3.72114  | 4.35552  |
| 317 | 1 | 0 | -7.37184 | 4.27085  | 5.06843  |
| 318 | 1 | 0 | -6.42984 | 3.00013  | 5.85992  |
| 319 | 6 | 0 | -7.95332 | 2.9964   | 2.75096  |
| 320 | 1 | 0 | -7.10447 | 3.39285  | 2.18595  |
| 321 | 1 | 0 | -8.5012  | 2.29526  | 2.11204  |
| 322 | 1 | 0 | -8.62113 | 3.83589  | 2.97214  |
| 323 | 6 | 0 | 7.50224  | -2.34066 | -4.0614  |
| 324 | 6 | 0 | 4.80646  | 1.46119  | -6.03387 |
| 325 | 6 | 0 | 8.75981  | -1.89204 | -4.83026 |
| 326 | 1 | 0 | 9.41901  | -2.74849 | -5.01205 |
| 327 | 1 | 0 | 8.5135   | -1.45491 | -5.80223 |
| 328 | 1 | 0 | 9.32255  | -1.14411 | -4.2616  |
| 329 | 6 | 0 | 6.02832  | 1.88629  | -6.87093 |
| 330 | 1 | 0 | 6.62069  | 1.03055  | -7.20799 |
| 331 | 1 | 0 | 5.70038  | 2.42811  | -7.76501 |
| 332 | 1 | 0 | 6.68838  | 2.54572  | -6.29751 |
| 333 | 6 | 0 | 3.90962  | 0.52572  | -6.86913 |
| 334 | 1 | 0 | 3.02987  | 0.21644  | -6.29683 |



|     |   |   |           |          |          |
|-----|---|---|-----------|----------|----------|
| 335 | 1 | 0 | 3.56914   | 1.0368   | -7.77727 |
| 336 | 1 | 0 | 4.44671   | -0.37706 | -7.17723 |
| 337 | 6 | 0 | 4.00519   | 2.7237   | -5.69422 |
| 338 | 1 | 0 | 3.09433   | 2.49309  | -5.13619 |
| 339 | 1 | 0 | 4.598     | 3.42992  | -5.10213 |
| 340 | 1 | 0 | 3.7119    | 3.23018  | -6.62006 |
| 341 | 6 | 0 | 6.73812   | -3.39468 | -4.88708 |
| 342 | 1 | 0 | 7.37163   | -4.27085 | -5.06852 |
| 343 | 1 | 0 | 5.83891   | -3.72109 | -4.35565 |
| 344 | 1 | 0 | 6.42974   | -3.00002 | -5.85997 |
| 345 | 6 | 0 | 7.95307   | -2.99658 | -2.75094 |
| 346 | 1 | 0 | 8.50094   | -2.29549 | -2.11194 |
| 347 | 1 | 0 | 7.10417   | -3.39302 | -2.186   |
| 348 | 1 | 0 | 8.62086   | -3.83608 | -2.97214 |
| 349 | 1 | 0 | 0.05589   | 8.44967  | -4.43971 |
| 350 | 1 | 0 | -11.00589 | 6.07174  | -1.33312 |
| 351 | 1 | 0 | -12.93664 | -0.56939 | -2.53529 |
| 352 | 1 | 0 | -4.47482  | -2.84558 | -4.28888 |
| 353 | 1 | 0 | -5.72326  | -9.82215 | 0.44522  |
| 354 | 1 | 0 | -0.3909   | -8.13187 | -2.13382 |
| 355 | 1 | 0 | 11.00593  | -6.07174 | 1.33303  |
| 356 | 1 | 0 | 12.9367   | 0.56939  | 2.53518  |
| 357 | 1 | 0 | 4.4748    | 2.84558  | 4.28892  |
| 358 | 1 | 0 | 0.39091   | 8.13187  | 2.13381  |
| 359 | 1 | 0 | 5.72335   | 9.82215  | -0.44536 |
| 360 | 1 | 0 | -0.05584  | -8.44969 | 4.43966  |

---

The total electronic energy is calculated to be -9208.29742799 a.u.

## References

[1] (S1) Gaussian 09, Revision B.01, Frisch, M.J.; Trucks, G.W.; Schlegel, H.B.; Scuseria, G.E.; Robb, M.A.; Cheeseman, J.R.; Scalmani, G.; Barone, V.; Mennucci, B.; Petersson, G.A.; Nakatsuji, H.; Caricato, M.; Li, X.; Hratchian, H. P.; Izmaylov, A. F.; Bloino, J.; Zheng, G.; Sonnenberg, J.L.; Hada, M.; Ehara, M.; Toyota, K.; Fukuda, R.; Hasegawa, J.; Ishida, M.; Nakajima, T.; Honda, Y.; Kitao, O.; Nakai, H.; Vreven, T.; Montgomery, J.A., Jr.; Peralta, J.E.; Ogliaro, F.; Bearpark, M.; Heyd, J. J.; Brothers, E.; Kudin, K. N.; Staroverov, V. N.; Keith, T.; Kobayashi, R.; Normand, J.; Raghavachari, K.; Rendell, A.; Burant, J. C.; Iyengar, S.S.; Tomasi, J.; Cossi, M.; Rega, N.; Millam, J.M.; Klene, M.; Knox, J.E.; Cross, J.B.; Bakken, V.; Adamo, C.; Jaramillo, J.; Gomperts, R.; Stratmann, R.E.; Yazyev, O.; Austin, A.J.; Cammi, R.; Pomelli, C.; Ochterski, J.W.; Martin, R.L.; Morokuma, K.; Zakrzewski, V.G.; Voth, G.A.; Salvador, P.; Dannenberg, J.J.; Dapprich, S.; Daniels, A.D.; Farkas, O.J.; Foresman, B.; Ortiz, J.V.; Cioslowski, J.; Fox, D. J. Gaussian, Inc., Wallingford CT, **2010**.
